# Supplementary material for: A chromosome-level genome assembly and multi-omics analyses provide insights into the biosynthesis of piperlongumine in Piper sarmentosum
Source: Research Square preprint supplement (doi:10.21203/rs.3.rs-6556353/v1), 2025-11-10
Supplement: Supplementary file 1 [file 234e24b278257ca6a4caa124.xlsx]

## Sheet: Supplementary data 1
Supplementary data 1: BUSCO analysis results of the genome and coding proteins.
Genome													Protein
# BUSCO version is: 5.4.7													# BUSCO version is: 5.4.7
# The lineage dataset is: embryophyta_odb10 (Creation date: 2024-01-08, number of genomes: 50, number of BUSCOs: 1614)													# The lineage dataset is: embryophyta_odb10 (Creation date: 2024-01-08, number of genomes: 50, number of BUSCOs: 1614)
# Summarized benchmarking in BUSCO notation for file /home/yjl/Luo/Geno/ass_anno/genome.fa													# Summarized benchmarking in BUSCO notation for file /home/yjl/Luo/Geno/ass_anno/Pbe.pep
# BUSCO was run in mode: euk_genome_met													# BUSCO was run in mode: proteins
# Gene predictor used: metaeuk
													***** Results: *****
***** Results: *****
													C:98.6%[S:65.4%,D:33.2%],F:0.2%,M:1.2%,n:1614
C:97.2%[S:75.9%,D:21.3%],F:1.2%,M:1.6%,n:1614													1592 Complete BUSCOs (C)
1569 Complete BUSCOs (C)													1056 Complete and single-copy BUSCOs (S)
1225 Complete and single-copy BUSCOs (S)													536 Complete and duplicated BUSCOs (D)
344 Complete and duplicated BUSCOs (D)													3 Fragmented BUSCOs (F)
20 Fragmented BUSCOs (F)													19 Missing BUSCOs (M)
25 Missing BUSCOs (M)													1614 Total BUSCO groups searched
1614 Total BUSCO groups searched
													Dependencies and versions:
Assembly Statistics:													hmmsearch: 3.1
													busco: 5.4.7
Dependencies and versions:
hmmsearch: 3.1
bbtools: 39.01
metaeuk: 6.a5d39d9
busco: 5.4.7

## Sheet: Supplementary data 2
Supplementary data 2: Repeat Sequence Prediction Score
==================================================
file name: genome.fa
sequences: 35
total length: 548451393 bp (548441193 bp excl N/X-runs)
GC level: 38.38 %
bases masked: 317459465 bp ( 57.88 %)
==================================================
number of length percentage
elements* occupied of sequence
--------------------------------------------------
Retroelements 165471 174498674 bp 31.82 %
SINEs: 939 204105 bp 0.04 %
Penelope: 0 0 bp 0.00 %
LINEs: 6394 2201250 bp 0.40 %
CRE/SLACS 0 0 bp 0.00 %
L2/CR1/Rex 1070 352852 bp 0.06 %
R1/LOA/Jockey 0 0 bp 0.00 %
R2/R4/NeSL 0 0 bp 0.00 %
RTE/Bov-B 3677 767718 bp 0.14 %
L1/CIN4 1529 961406 bp 0.18 %
LTR elements: 158138 172093319 bp 31.38 %
BEL/Pao 1634 356019 bp 0.06 %
Ty1/Copia 32322 28115423 bp 5.13 %
Gypsy/DIRS1 120059 140891837 bp 25.69 %
Retroviral 145 21293 bp 0.00 %
DNA transposons 49602 22496684 bp 4.10 %
hobo-Activator 25974 9683124 bp 1.77 %
Tc1-IS630-Pogo 1499 694011 bp 0.13 %
En-Spm 0 0 bp 0.00 %
MULE-MuDR 7519 3569118 bp 0.65 %
PiggyBac 0 0 bp 0.00 %
Tourist/Harbinger 20 5739 bp 0.00 %
Other (Mirage, 0 0 bp 0.00 %
P-element, Transib)
Rolling-circles 2925 1167983 bp 0.21 %
Unclassified: 270895 102980678 bp 18.78 %
Total interspersed repeats: 299976036 bp 54.70 %
Small RNA: 1138 2062008 bp 0.38 %
Satellites: 9101 7191739 bp 1.31 %
Simple repeats: 133666 6139959 bp 1.12 %
Low complexity: 17837 921740 bp 0.17 %
==================================================
* most repeats fragmented by insertions or deletions
have been counted as one element
RepeatMasker version 4.1.5 , rushjob mode
run with rmblastn version 2.14.1+
The query was compared to classified sequences in "sesame-families.fa"
FamDB:

## Sheet: Supplementary data 3
Supplementary data 3：GO Functional Enrichment Analysis of LTR Gene Family
id	num	pvalue	per	ratio	class	ID	Descrption	Pvalue	Qvalue	Up	Down	fg_num	bg_num
GO:0000943 retrotransposon nucleocapsid	16	2.71379e-13	1.232	0.5	Cellular Component	GO:0000943	retrotransposon nucleocapsid	2.71379e-13	1.54958e-10	0	0	16	32
GO:0032197 transposition, RNA-mediated	16	1.23323e-12	1.188	0.471	Biological Process	GO:0032197	transposition, RNA-mediated	1.23323e-12	4.43715e-09	0	0	16	34
GO:0047412 N-(long-chain-acyl)ethanolamine deacylase activity	13	3.31372e-12	1.039	0.591	Molecular Function	GO:0047412	N-(long-chain-acyl)ethanolamine deacylase activity	3.31372e-12	3.78758e-09	0	0	13	22
GO:0070291 N-acylethanolamine metabolic process	13	3.57442e-12	0.965	0.591	Biological Process	GO:0070291	N-acylethanolamine metabolic process	3.57442e-12	6.43039e-09	0	0	13	22
GO:0004523 RNA-DNA hybrid ribonuclease activity	16	9.40335e-12	1.279	0.421	Molecular Function	GO:0004523	RNA-DNA hybrid ribonuclease activity	9.40335e-12	5.37401e-09	0	0	16	38
GO:0004040 amidase activity	15	3.09196e-11	1.199	0.429	Molecular Function	GO:0004040	amidase activity	3.09196e-11	1.17803e-08	0	0	15	35
GO:0004190 aspartic-type endopeptidase activity	29	7.51087e-11	2.318	0.203	Molecular Function	GO:0004190	aspartic-type endopeptidase activity	7.51087e-11	1.71698e-08	0	0	29	143
GO:0070001 aspartic-type peptidase activity	29	7.51087e-11	2.318	0.203	Molecular Function	GO:0070001	aspartic-type peptidase activity	7.51087e-11	1.71698e-08	0	0	29	143
GO:0003964 RNA-directed DNA polymerase activity	17	1.20933e-10	1.359	0.34	Molecular Function	GO:0003964	RNA-directed DNA polymerase activity	1.20933e-10	2.30377e-08	0	0	17	50
GO:0032196 transposition	16	2.15079e-10	1.188	0.356	Biological Process	GO:0032196	transposition	2.15079e-10	2.57952e-07	0	0	16	45
GO:0015074 DNA integration	17	5.26348e-10	1.262	0.315	Biological Process	GO:0015074	DNA integration	5.26348e-10	4.7345e-07	0	0	17	54
GO:0051443 positive regulation of ubiquitin-protein transferase activity	13	9.73001e-10	0.965	0.419	Biological Process	GO:0051443	positive regulation of ubiquitin-protein transferase activity	9.73001e-10	7.00171e-07	0	0	13	31
GO:0051351 positive regulation of ligase activity	13	1.56396e-09	0.965	0.406	Biological Process	GO:0051351	positive regulation of ligase activity	1.56396e-09	9.37856e-07	0	0	13	32
GO:0034004 germacradienol synthase activity	15	4.08184e-09	1.199	0.319	Molecular Function	GO:0034004	germacradienol synthase activity	4.08184e-09	5.83194e-07	0	0	15	47
GO:0052577 germacrene-D synthase activity	15	4.08184e-09	1.199	0.319	Molecular Function	GO:0052577	germacrene-D synthase activity	4.08184e-09	5.83194e-07	0	0	15	47
GO:0006278 RNA-dependent DNA replication	21	4.45608e-09	1.559	0.226	Biological Process	GO:0006278	RNA-dependent DNA replication	4.45608e-09	2.29042e-06	0	0	21	93
GO:0004029 aldehyde dehydrogenase (NAD) activity	14	7.10346e-09	1.119	0.333	Molecular Function	GO:0004029	aldehyde dehydrogenase (NAD) activity	7.10346e-09	9.02139e-07	0	0	14	42
GO:0016838 carbon-oxygen lyase activity, acting on phosphates	20	8.29612e-09	1.599	0.227	Molecular Function	GO:0016838	carbon-oxygen lyase activity, acting on phosphates	8.29612e-09	9.48246e-07	0	0	20	88
GO:0051438 regulation of ubiquitin-protein transferase activity	16	1.09314e-08	1.188	0.281	Biological Process	GO:0051438	regulation of ubiquitin-protein transferase activity	1.09314e-08	4.9164e-06	0	0	16	57
GO:0010333 terpene synthase activity	19	1.11923e-08	1.519	0.235	Molecular Function	GO:0010333	terpene synthase activity	1.11923e-08	9.84173e-07	0	0	19	81
GO:0051340 regulation of ligase activity	16	1.44006e-08	1.188	0.276	Biological Process	GO:0051340	regulation of ligase activity	1.44006e-08	5.75704e-06	0	0	16	58
GO:0004031 aldehyde oxidase activity	8	1.46377e-08	0.639	0.667	Molecular Function	GO:0004031	aldehyde oxidase activity	1.46377e-08	9.84173e-07	0	0	8	12
GO:0010293 abscisic aldehyde oxidase activity	8	1.46377e-08	0.639	0.667	Molecular Function	GO:0010293	abscisic aldehyde oxidase activity	1.46377e-08	9.84173e-07	0	0	8	12
GO:0016623 oxidoreductase activity, acting on the aldehyde or oxo group of donors, oxygen as acceptor	8	1.46377e-08	0.639	0.667	Molecular Function	GO:0016623	oxidoreductase activity, acting on the aldehyde or oxo group of donors, oxygen as acceptor	1.46377e-08	9.84173e-07	0	0	8	12
GO:0018479 benzaldehyde dehydrogenase (NAD+) activity	8	1.46377e-08	0.639	0.667	Molecular Function	GO:0018479	benzaldehyde dehydrogenase (NAD+) activity	1.46377e-08	9.84173e-07	0	0	8	12
GO:0018488 aryl-aldehyde oxidase activity	8	1.46377e-08	0.639	0.667	Molecular Function	GO:0018488	aryl-aldehyde oxidase activity	1.46377e-08	9.84173e-07	0	0	8	12
GO:0050302 indole-3-acetaldehyde oxidase activity	8	1.46377e-08	0.639	0.667	Molecular Function	GO:0050302	indole-3-acetaldehyde oxidase activity	1.46377e-08	9.84173e-07	0	0	8	12
GO:0001678 cellular glucose homeostasis	17	4.1263e-08	1.262	0.243	Biological Process	GO:0001678	cellular glucose homeostasis	4.1263e-08	1.48464e-05	0	0	17	70
GO:0033597 mitotic checkpoint complex	7	6.84275e-08	0.539	0.7	Cellular Component	GO:0033597	mitotic checkpoint complex	6.84275e-08	1.9536e-05	0	0	7	10
GO:0071326 cellular response to monosaccharide stimulus	16	8.39263e-08	1.188	0.246	Biological Process	GO:0071326	cellular response to monosaccharide stimulus	8.39263e-08	2.18459e-05	0	0	16	65
GO:0071331 cellular response to hexose stimulus	16	8.39263e-08	1.188	0.246	Biological Process	GO:0071331	cellular response to hexose stimulus	8.39263e-08	2.18459e-05	0	0	16	65
GO:0071333 cellular response to glucose stimulus	16	8.39263e-08	1.188	0.246	Biological Process	GO:0071333	cellular response to glucose stimulus	8.39263e-08	2.18459e-05	0	0	16	65
GO:0071332 cellular response to fructose stimulus	8	8.50036e-08	0.594	0.571	Biological Process	GO:0071332	cellular response to fructose stimulus	8.50036e-08	2.18459e-05	0	0	8	14
GO:0042593 glucose homeostasis	17	1.84638e-07	1.262	0.221	Biological Process	GO:0042593	glucose homeostasis	1.84638e-07	4.42884e-05	0	0	17	77
GO:0047172 shikimate O-hydroxycinnamoyltransferase activity	7	1.9869e-07	0.56	0.636	Molecular Function	GO:0047172	shikimate O-hydroxycinnamoyltransferase activity	1.9869e-07	1.11419e-05	0	0	7	11
GO:0047205 quinate O-hydroxycinnamoyltransferase activity	7	1.9869e-07	0.56	0.636	Molecular Function	GO:0047205	quinate O-hydroxycinnamoyltransferase activity	1.9869e-07	1.11419e-05	0	0	7	11
GO:0050737 O-hydroxycinnamoyltransferase activity	7	1.9869e-07	0.56	0.636	Molecular Function	GO:0050737	O-hydroxycinnamoyltransferase activity	1.9869e-07	1.11419e-05	0	0	7	11
GO:0016620 oxidoreductase activity, acting on the aldehyde or oxo group of donors, NAD or NADP as acceptor	19	2.04707e-07	1.519	0.198	Molecular Function	GO:0016620	oxidoreductase activity, acting on the aldehyde or oxo group of donors, NAD or NADP as acceptor	2.04707e-07	1.11419e-05	0	0	19	96
GO:1904668 positive regulation of ubiquitin protein ligase activity	10	2.31604e-07	0.742	0.385	Biological Process	GO:1904668	positive regulation of ubiquitin protein ligase activity	2.31604e-07	5.20818e-05	0	0	10	26
GO:0010334 sesquiterpene synthase activity	16	4.32526e-07	1.279	0.219	Molecular Function	GO:0010334	sesquiterpene synthase activity	4.32526e-07	2.24717e-05	0	0	16	73
GO:0004306 ethanolamine-phosphate cytidylyltransferase activity	7	4.56363e-07	0.56	0.583	Molecular Function	GO:0004306	ethanolamine-phosphate cytidylyltransferase activity	4.56363e-07	2.26793e-05	0	0	7	12
GO:0016835 carbon-oxygen lyase activity	39	5.19908e-07	3.118	0.118	Molecular Function	GO:0016835	carbon-oxygen lyase activity	5.19908e-07	2.47606e-05	0	0	39	331
GO:0016114 terpenoid biosynthetic process	39	5.62692e-07	2.895	0.118	Biological Process	GO:0016114	terpenoid biosynthetic process	5.62692e-07	0.000114021	0	0	39	330
GO:0042439 ethanolamine-containing compound metabolic process	16	5.7042e-07	1.188	0.216	Biological Process	GO:0042439	ethanolamine-containing compound metabolic process	5.7042e-07	0.000114021	0	0	16	74
GO:0009627 systemic acquired resistance	25	7.6511e-07	1.856	0.151	Biological Process	GO:0009627	systemic acquired resistance	7.6511e-07	0.000144888	0	0	25	166
GO:0003844 1,4-alpha-glucan branching enzyme activity	8	9.90368e-07	0.639	0.444	Molecular Function	GO:0003844	1,4-alpha-glucan branching enzyme activity	9.90368e-07	4.52796e-05	0	0	8	18
GO:1904666 regulation of ubiquitin protein ligase activity	13	1.12625e-06	0.965	0.25	Biological Process	GO:1904666	regulation of ubiquitin protein ligase activity	1.12625e-06	0.000202612	0	0	13	52
GO:0044093 positive regulation of molecular function	59	1.24752e-06	4.38	0.096	Biological Process	GO:0044093	positive regulation of molecular function	1.24752e-06	0.000213741	0	0	59	615
GO:0034308 primary alcohol metabolic process	13	1.42455e-06	0.965	0.245	Biological Process	GO:0034308	primary alcohol metabolic process	1.42455e-06	0.000232979	0	0	13	53
GO:0008299 isoprenoid biosynthetic process	42	1.54646e-06	3.118	0.11	Biological Process	GO:0008299	isoprenoid biosynthetic process	1.54646e-06	0.00024192	0	0	42	383
GO:2000030 regulation of response to red or far red light	17	1.62063e-06	1.262	0.191	Biological Process	GO:2000030	regulation of response to red or far red light	1.62063e-06	0.000242959	0	0	17	89
GO:0080032 methyl jasmonate esterase activity	8	1.63622e-06	0.639	0.421	Molecular Function	GO:0080032	methyl jasmonate esterase activity	1.63622e-06	7.19308e-05	0	0	8	19
GO:0003887 DNA-directed DNA polymerase activity	18	1.82825e-06	1.439	0.18	Molecular Function	GO:0003887	DNA-directed DNA polymerase activity	1.82825e-06	7.73959e-05	0	0	18	100
GO:0043085 positive regulation of catalytic activity	53	3.2084e-06	3.935	0.097	Biological Process	GO:0043085	positive regulation of catalytic activity	3.2084e-06	0.000461753	0	0	53	547
GO:0080031 methyl salicylate esterase activity	7	3.25077e-06	0.56	0.467	Molecular Function	GO:0080031	methyl salicylate esterase activity	3.25077e-06	0.000132701	0	0	7	15
GO:0034061 DNA polymerase activity	19	4.12961e-06	1.519	0.164	Molecular Function	GO:0034061	DNA polymerase activity	4.12961e-06	0.000162764	0	0	19	116
GO:0050790 regulation of catalytic activity	83	4.50802e-06	6.162	0.083	Biological Process	GO:0050790	regulation of catalytic activity	4.50802e-06	0.000602044	0	0	83	1005
GO:0065009 regulation of molecular function	97	4.7506e-06	7.201	0.079	Biological Process	GO:0065009	regulation of molecular function	4.7506e-06	0.000602044	0	0	97	1228
GO:0006721 terpenoid metabolic process	41	4.85544e-06	3.044	0.106	Biological Process	GO:0006721	terpenoid metabolic process	4.85544e-06	0.000602044	0	0	41	387
GO:0009688 abscisic acid biosynthetic process	13	5.18733e-06	0.965	0.22	Biological Process	GO:0009688	abscisic acid biosynthetic process	5.18733e-06	0.000602044	0	0	13	59
GO:0043289 apocarotenoid biosynthetic process	13	5.18733e-06	0.965	0.22	Biological Process	GO:0043289	apocarotenoid biosynthetic process	5.18733e-06	0.000602044	0	0	13	59
GO:1902645 tertiary alcohol biosynthetic process	13	5.18733e-06	0.965	0.22	Biological Process	GO:1902645	tertiary alcohol biosynthetic process	5.18733e-06	0.000602044	0	0	13	59
GO:2000306 positive regulation of photomorphogenesis	9	5.35448e-06	0.668	0.321	Biological Process	GO:2000306	positive regulation of photomorphogenesis	5.35448e-06	0.000602044	0	0	9	28
GO:0080030 methyl indole-3-acetate esterase activity	7	5.5315e-06	0.56	0.438	Molecular Function	GO:0080030	methyl indole-3-acetate esterase activity	5.5315e-06	0.00021075	0	0	7	16
GO:0033500 carbohydrate homeostasis	17	6.40183e-06	1.262	0.173	Biological Process	GO:0033500	carbohydrate homeostasis	6.40183e-06	0.000697993	0	0	17	98
GO:0046593 mandelonitrile lyase activity	7	9.00088e-06	0.56	0.412	Molecular Function	GO:0046593	mandelonitrile lyase activity	9.00088e-06	0.000331871	0	0	7	17
GO:0071324 cellular response to disaccharide stimulus	9	1.01342e-05	0.668	0.3	Biological Process	GO:0071324	cellular response to disaccharide stimulus	1.01342e-05	0.0010418	0	0	9	30
GO:0071329 cellular response to sucrose stimulus	9	1.01342e-05	0.668	0.3	Biological Process	GO:0071329	cellular response to sucrose stimulus	1.01342e-05	0.0010418	0	0	9	30
GO:0016903 oxidoreductase activity, acting on the aldehyde or oxo group of donors	20	1.11441e-05	1.599	0.148	Molecular Function	GO:0016903	oxidoreductase activity, acting on the aldehyde or oxo group of donors	1.11441e-05	0.000398053	0	0	20	135
GO:0006720 isoprenoid metabolic process	44	1.16131e-05	3.267	0.099	Biological Process	GO:0006720	isoprenoid metabolic process	1.16131e-05	0.00116067	0	0	44	443
GO:0010029 regulation of seed germination	22	1.39213e-05	1.633	0.138	Biological Process	GO:0010029	regulation of seed germination	1.39213e-05	0.00135375	0	0	22	159
GO:0033862 UMP kinase activity	5	1.45838e-05	0.4	0.625	Molecular Function	GO:0033862	UMP kinase activity	1.45838e-05	0.000505128	0	0	5	8
GO:0006508 proteolysis	132	1.51499e-05	9.8	0.072	Biological Process	GO:0006508	proteolysis	1.51499e-05	0.00143446	0	0	132	1845
GO:0016829 lyase activity	62	1.75067e-05	4.956	0.086	Molecular Function	GO:0016829	lyase activity	1.75067e-05	0.000583801	0	0	62	720
GO:0070011 peptidase activity, acting on L-amino acid peptides	66	1.78767e-05	5.276	0.084	Molecular Function	GO:0070011	peptidase activity, acting on L-amino acid peptides	1.78767e-05	0.000583801	0	0	66	782
GO:0010021 amylopectin biosynthetic process	8	1.87187e-05	0.594	0.32	Biological Process	GO:0010021	amylopectin biosynthetic process	1.87187e-05	0.00168375	0	0	8	25
GO:2000896 amylopectin metabolic process	8	1.87187e-05	0.594	0.32	Biological Process	GO:2000896	amylopectin metabolic process	1.87187e-05	0.00168375	0	0	8	25
GO:0030983 mismatched DNA binding	9	2.27782e-05	0.719	0.273	Molecular Function	GO:0030983	mismatched DNA binding	2.27782e-05	0.000723209	0	0	9	33
GO:0045910 negative regulation of DNA recombination	9	2.38635e-05	0.668	0.273	Biological Process	GO:0045910	negative regulation of DNA recombination	2.38635e-05	0.00209417	0	0	9	33
GO:0019748 secondary metabolic process	60	2.54996e-05	4.454	0.086	Biological Process	GO:0019748	secondary metabolic process	2.54996e-05	0.00218446	0	0	60	694
GO:0051336 regulation of hydrolase activity	42	2.85261e-05	3.118	0.097	Biological Process	GO:0051336	regulation of hydrolase activity	2.85261e-05	0.0023869	0	0	42	431
GO:0045735 nutrient reservoir activity	12	3.1694e-05	0.959	0.2	Molecular Function	GO:0045735	nutrient reservoir activity	3.1694e-05	0.000979088	0	0	12	60
GO:1901529 positive regulation of anion channel activity	5	3.23653e-05	0.371	0.556	Biological Process	GO:1901529	positive regulation of anion channel activity	3.23653e-05	0.00244922	0	0	5	9
GO:1903793 positive regulation of anion transport	5	3.23653e-05	0.371	0.556	Biological Process	GO:1903793	positive regulation of anion transport	3.23653e-05	0.00244922	0	0	5	9
GO:1903961 positive regulation of anion transmembrane transport	5	3.23653e-05	0.371	0.556	Biological Process	GO:1903961	positive regulation of anion transmembrane transport	3.23653e-05	0.00244922	0	0	5	9
GO:0006513 protein monoubiquitination	7	3.26744e-05	0.52	0.35	Biological Process	GO:0006513	protein monoubiquitination	3.26744e-05	0.00244922	0	0	7	20
GO:0016139 glycoside catabolic process	7	3.26744e-05	0.52	0.35	Biological Process	GO:0016139	glycoside catabolic process	3.26744e-05	0.00244922	0	0	7	20
GO:0008233 peptidase activity	67	4.09101e-05	5.356	0.082	Molecular Function	GO:0008233	peptidase activity	4.09101e-05	0.00123053	0	0	67	819
GO:0009687 abscisic acid metabolic process	13	4.27384e-05	0.965	0.183	Biological Process	GO:0009687	abscisic acid metabolic process	4.27384e-05	0.00300246	0	0	13	71
GO:0043288 apocarotenoid metabolic process	13	4.27384e-05	0.965	0.183	Biological Process	GO:0043288	apocarotenoid metabolic process	4.27384e-05	0.00300246	0	0	13	71
GO:1902644 tertiary alcohol metabolic process	13	4.27384e-05	0.965	0.183	Biological Process	GO:1902644	tertiary alcohol metabolic process	4.27384e-05	0.00300246	0	0	13	71
GO:0071897 DNA biosynthetic process	25	4.3393e-05	1.856	0.12	Biological Process	GO:0071897	DNA biosynthetic process	4.3393e-05	0.00300246	0	0	25	208
GO:0010997 anaphase-promoting complex binding	6	4.95084e-05	0.48	0.4	Molecular Function	GO:0010997	anaphase-promoting complex binding	4.95084e-05	0.00145098	0	0	6	15
GO:0010359 regulation of anion channel activity	9	5.08959e-05	0.668	0.25	Biological Process	GO:0010359	regulation of anion channel activity	5.08959e-05	0.00345516	0	0	9	36
GO:1900140 regulation of seedling development	22	5.22228e-05	1.633	0.127	Biological Process	GO:1900140	regulation of seedling development	5.22228e-05	0.00347959	0	0	22	173
GO:0005829 cytosol	249	5.44476e-05	19.169	0.061	Cellular Component	GO:0005829	cytosol	5.44476e-05	0.00816454	0	0	249	4061
GO:0016811 hydrolase activity, acting on carbon-nitrogen (but not peptide) bonds, in linear amides	18	5.49789e-05	1.439	0.142	Molecular Function	GO:0016811	hydrolase activity, acting on carbon-nitrogen (but not peptide) bonds, in linear amides	5.49789e-05	0.00157102	0	0	18	127
GO:0006260 DNA replication	46	5.84701e-05	3.415	0.091	Biological Process	GO:0006260	DNA replication	5.84701e-05	0.0038171	0	0	46	503
GO:0009904 chloroplast accumulation movement	11	5.94101e-05	0.817	0.204	Biological Process	GO:0009904	chloroplast accumulation movement	5.94101e-05	0.0038171	0	0	11	54
GO:0003684 damaged DNA binding	14	6.09799e-05	1.119	0.167	Molecular Function	GO:0003684	damaged DNA binding	6.09799e-05	0.0017	0	0	14	84
GO:0016137 glycoside metabolic process	8	6.21672e-05	0.594	0.276	Biological Process	GO:0016137	glycoside metabolic process	6.21672e-05	0.00392417	0	0	8	29
GO:0055106 ubiquitin-protein transferase regulator activity	6	7.58945e-05	0.48	0.375	Molecular Function	GO:0055106	ubiquitin-protein transferase regulator activity	7.58945e-05	0.00201738	0	0	6	16
GO:0097027 ubiquitin-protein transferase activator activity	6	7.58945e-05	0.48	0.375	Molecular Function	GO:0097027	ubiquitin-protein transferase activator activity	7.58945e-05	0.00201738	0	0	6	16
GO:0000444 MIS12/MIND type complex	4	7.82684e-05	0.308	0.667	Cellular Component	GO:0000444	MIS12/MIND type complex	7.82684e-05	0.00816454	0	0	4	6
GO:0000818 nuclear MIS12/MIND complex	4	7.82684e-05	0.308	0.667	Cellular Component	GO:0000818	nuclear MIS12/MIND complex	7.82684e-05	0.00816454	0	0	4	6
GO:0000304 response to singlet oxygen	6	7.83961e-05	0.445	0.375	Biological Process	GO:0000304	response to singlet oxygen	7.83961e-05	0.00486326	0	0	6	16
GO:0010042 response to manganese ion	4	8.46983e-05	0.297	0.667	Biological Process	GO:0010042	response to manganese ion	8.46983e-05	0.00507907	0	0	4	6
GO:0048864 stem cell development	4	8.46983e-05	0.297	0.667	Biological Process	GO:0048864	stem cell development	8.46983e-05	0.00507907	0	0	4	6
GO:0009963 positive regulation of flavonoid biosynthetic process	7	9.05915e-05	0.52	0.304	Biological Process	GO:0009963	positive regulation of flavonoid biosynthetic process	9.05915e-05	0.00534341	0	0	7	23
GO:0032300 mismatch repair complex	8	9.08287e-05	0.616	0.258	Cellular Component	GO:0032300	mismatch repair complex	9.08287e-05	0.00816454	0	0	8	31
GO:0016891 endoribonuclease activity, producing 5'-phosphomonoesters	16	9.16831e-05	1.279	0.147	Molecular Function	GO:0016891	endoribonuclease activity, producing 5'-phosphomonoesters	9.16831e-05	0.00238168	0	0	16	109
GO:0031398 positive regulation of protein ubiquitination	15	9.91075e-05	1.114	0.153	Biological Process	GO:0031398	positive regulation of protein ubiquitination	9.91075e-05	0.00566014	0	0	15	98
GO:1903322 positive regulation of protein modification by small protein conjugation or removal	15	9.91075e-05	1.114	0.153	Biological Process	GO:1903322	positive regulation of protein modification by small protein conjugation or removal	9.91075e-05	0.00566014	0	0	15	98
GO:0009501 amyloplast	12	0.000100091	0.924	0.176	Cellular Component	GO:0009501	amyloplast	0.000100091	0.00816454	0	0	12	68
GO:0010343 singlet oxygen-mediated programmed cell death	5	0.000109113	0.371	0.455	Biological Process	GO:0010343	singlet oxygen-mediated programmed cell death	0.000109113	0.00594865	0	0	5	11
GO:0080005 photosystem stoichiometry adjustment	5	0.000109113	0.371	0.455	Biological Process	GO:0080005	photosystem stoichiometry adjustment	0.000109113	0.00594865	0	0	5	11
GO:0043086 negative regulation of catalytic activity	35	0.000113481	2.598	0.098	Biological Process	GO:0043086	negative regulation of catalytic activity	0.000113481	0.00594865	0	0	35	357
GO:0010842 retina layer formation	3	0.00012322	0.223	1	Biological Process	GO:0010842	retina layer formation	0.00012322	0.00594865	0	0	3	3
GO:0035845 photoreceptor cell outer segment organization	3	0.00012322	0.223	1	Biological Process	GO:0035845	photoreceptor cell outer segment organization	0.00012322	0.00594865	0	0	3	3
GO:0042670 retinal cone cell differentiation	3	0.00012322	0.223	1	Biological Process	GO:0042670	retinal cone cell differentiation	0.00012322	0.00594865	0	0	3	3
GO:0046548 retinal rod cell development	3	0.00012322	0.223	1	Biological Process	GO:0046548	retinal rod cell development	0.00012322	0.00594865	0	0	3	3
GO:0046549 retinal cone cell development	3	0.00012322	0.223	1	Biological Process	GO:0046549	retinal cone cell development	0.00012322	0.00594865	0	0	3	3
GO:0048593 camera-type eye morphogenesis	3	0.00012322	0.223	1	Biological Process	GO:0048593	camera-type eye morphogenesis	0.00012322	0.00594865	0	0	3	3
GO:0060042 retina morphogenesis in camera-type eye	3	0.00012322	0.223	1	Biological Process	GO:0060042	retina morphogenesis in camera-type eye	0.00012322	0.00594865	0	0	3	3
GO:0060219 camera-type eye photoreceptor cell differentiation	3	0.00012322	0.223	1	Biological Process	GO:0060219	camera-type eye photoreceptor cell differentiation	0.00012322	0.00594865	0	0	3	3
GO:0016106 sesquiterpenoid biosynthetic process	14	0.000123999	1.039	0.157	Biological Process	GO:0016106	sesquiterpenoid biosynthetic process	0.000123999	0.00594865	0	0	14	89
GO:0016893 endonuclease activity, active with either ribo- or deoxyribonucleic acids and producing 5'-phosphomonoesters	17	0.0001331	1.359	0.137	Molecular Function	GO:0016893	endonuclease activity, active with either ribo- or deoxyribonucleic acids and producing 5'-phosphomonoesters	0.0001331	0.00338074	0	0	17	124
GO:0005978 glycogen biosynthetic process	11	0.000138285	0.817	0.186	Biological Process	GO:0005978	glycogen biosynthetic process	0.000138285	0.00650769	0	0	11	59
GO:0051345 positive regulation of hydrolase activity	27	0.00013927	2.004	0.108	Biological Process	GO:0051345	positive regulation of hydrolase activity	0.00013927	0.00650769	0	0	27	250
GO:0009749 response to glucose	19	0.000145352	1.411	0.128	Biological Process	GO:0009749	response to glucose	0.000145352	0.00670485	0	0	19	148
GO:0006298 mismatch repair	9	0.000151321	0.668	0.22	Biological Process	GO:0006298	mismatch repair	0.000151321	0.00680564	0	0	9	41
GO:1903959 regulation of anion transmembrane transport	9	0.000151321	0.668	0.22	Biological Process	GO:1903959	regulation of anion transmembrane transport	0.000151321	0.00680564	0	0	9	41
GO:0055103 ligase regulator activity	6	0.000161524	0.48	0.333	Molecular Function	GO:0055103	ligase regulator activity	0.000161524	0.00401351	0	0	6	18
GO:0004030 aldehyde dehydrogenase [NAD(P)+] activity	5	0.000174541	0.4	0.417	Molecular Function	GO:0004030	aldehyde dehydrogenase [NAD(P)+] activity	0.000174541	0.00407144	0	0	5	12
GO:0008447 L-ascorbate oxidase activity	5	0.000174541	0.4	0.417	Molecular Function	GO:0008447	L-ascorbate oxidase activity	0.000174541	0.00407144	0	0	5	12
GO:0050269 coniferyl-aldehyde dehydrogenase activity	5	0.000174541	0.4	0.417	Molecular Function	GO:0050269	coniferyl-aldehyde dehydrogenase activity	0.000174541	0.00407144	0	0	5	12
GO:0000922 spindle pole	10	0.00017971	0.77	0.192	Cellular Component	GO:0000922	spindle pole	0.00017971	0.0128268	0	0	10	52
GO:0071000 response to magnetism	4	0.000189805	0.297	0.571	Biological Process	GO:0071000	response to magnetism	0.000189805	0.0084311	0	0	4	7
GO:0043531 ADP binding	20	0.000200287	1.599	0.121	Molecular Function	GO:0043531	ADP binding	0.000200287	0.00457855	0	0	20	165
GO:0070567 cytidylyltransferase activity	7	0.000205637	0.56	0.269	Molecular Function	GO:0070567	cytidylyltransferase activity	0.000205637	0.00460868	0	0	7	26
GO:0071322 cellular response to carbohydrate stimulus	24	0.000208187	1.782	0.111	Biological Process	GO:0071322	cellular response to carbohydrate stimulus	0.000208187	0.00913483	0	0	24	216
GO:0043022 ribosome binding	9	0.000213152	0.719	0.209	Molecular Function	GO:0043022	ribosome binding	0.000213152	0.00468524	0	0	9	43
GO:0044106 cellular amine metabolic process	24	0.000223251	1.782	0.111	Biological Process	GO:0044106	cellular amine metabolic process	0.000223251	0.00967778	0	0	24	217
GO:0031396 regulation of protein ubiquitination	18	0.000230715	1.336	0.128	Biological Process	GO:0031396	regulation of protein ubiquitination	0.000230715	0.00988231	0	0	18	141
GO:0010099 regulation of photomorphogenesis	10	0.000249255	0.742	0.189	Biological Process	GO:0010099	regulation of photomorphogenesis	0.000249255	0.0105508	0	0	10	53
GO:0051338 regulation of transferase activity	34	0.000256876	2.524	0.095	Biological Process	GO:0051338	regulation of transferase activity	0.000256876	0.010747	0	0	34	358
GO:0090502 RNA phosphodiester bond hydrolysis, endonucleolytic	19	0.000266547	1.411	0.123	Biological Process	GO:0090502	RNA phosphodiester bond hydrolysis, endonucleolytic	0.000266547	0.0110234	0	0	19	155
GO:1903320 regulation of protein modification by small protein conjugation or removal	18	0.00027525	1.336	0.126	Biological Process	GO:1903320	regulation of protein modification by small protein conjugation or removal	0.00027525	0.011254	0	0	18	143
GO:0044210 'de novo' CTP biosynthetic process	5	0.000279532	0.371	0.385	Biological Process	GO:0044210	'de novo' CTP biosynthetic process	0.000279532	0.0113006	0	0	5	13
GO:0016779 nucleotidyltransferase activity	34	0.000312435	2.718	0.093	Molecular Function	GO:0016779	nucleotidyltransferase activity	0.000312435	0.00673798	0	0	34	364
GO:0004521 endoribonuclease activity	17	0.000342191	1.359	0.127	Molecular Function	GO:0004521	endoribonuclease activity	0.000342191	0.00724303	0	0	17	134
GO:0016605 PML body	8	0.000342582	0.616	0.216	Cellular Component	GO:0016605	PML body	0.000342582	0.0200994	0	0	8	37
GO:0034501 protein localization to kinetochore	4	0.000364608	0.297	0.5	Biological Process	GO:0034501	protein localization to kinetochore	0.000364608	0.0142593	0	0	4	8
GO:0071459 protein localization to chromosome, centromeric region	4	0.000364608	0.297	0.5	Biological Process	GO:0071459	protein localization to chromosome, centromeric region	0.000364608	0.0142593	0	0	4	8
GO:1902448 positive regulation of shade avoidance	4	0.000364608	0.297	0.5	Biological Process	GO:1902448	positive regulation of shade avoidance	0.000364608	0.0142593	0	0	4	8
GO:0006629 lipid metabolic process	129	0.000379138	9.577	0.067	Biological Process	GO:0006629	lipid metabolic process	0.000379138	0.0146682	0	0	129	1932
GO:0000794 condensed nuclear chromosome	12	0.000381264	0.924	0.154	Cellular Component	GO:0000794	condensed nuclear chromosome	0.000381264	0.0200994	0	0	12	78
GO:0006576 cellular biogenic amine metabolic process	20	0.000406294	1.485	0.116	Biological Process	GO:0006576	cellular biogenic amine metabolic process	0.000406294	0.0154013	0	0	20	173
GO:0009746 response to hexose	21	0.00040665	1.559	0.113	Biological Process	GO:0009746	response to hexose	0.00040665	0.0154013	0	0	21	186
GO:0071452 cellular response to singlet oxygen	5	0.000417026	0.371	0.357	Biological Process	GO:0071452	cellular response to singlet oxygen	0.000417026	0.0154746	0	0	5	14
GO:0010310 regulation of hydrogen peroxide metabolic process	7	0.00044371	0.52	0.241	Biological Process	GO:0010310	regulation of hydrogen peroxide metabolic process	0.00044371	0.0154746	0	0	7	29
GO:0044322 endoplasmic reticulum quality control compartment	3	0.000447039	0.231	0.75	Cellular Component	GO:0044322	endoplasmic reticulum quality control compartment	0.000447039	0.0200994	0	0	3	4
GO:0052718 tRNA-specific adenosine-34 deaminase complex	3	0.000447039	0.231	0.75	Cellular Component	GO:0052718	tRNA-specific adenosine-34 deaminase complex	0.000447039	0.0200994	0	0	3	4
GO:0044763 single-organism cellular process	832	0.000456787	61.767	0.054	Biological Process	GO:0044763	single-organism cellular process	0.000456787	0.0154746	0	0	832	15525
GO:1990391 DNA repair complex	9	0.000457603	0.693	0.188	Cellular Component	GO:1990391	DNA repair complex	0.000457603	0.0200994	0	0	9	48
GO:0009739 response to gibberellin	33	0.000460331	2.45	0.093	Biological Process	GO:0009739	response to gibberellin	0.000460331	0.0154746	0	0	33	355
GO:0008765 UDP-N-acetylmuramoylalanyl-D-glutamate-2,6-diaminopimelate ligase activity	3	0.000466483	0.24	0.75	Molecular Function	GO:0008765	UDP-N-acetylmuramoylalanyl-D-glutamate-2,6-diaminopimelate ligase activity	0.000466483	0.00903711	0	0	3	4
GO:0008840 4-hydroxy-tetrahydrodipicolinate synthase	3	0.000466483	0.24	0.75	Molecular Function	GO:0008840	4-hydroxy-tetrahydrodipicolinate synthase	0.000466483	0.00903711	0	0	3	4
GO:0044547 DNA topoisomerase binding	3	0.000466483	0.24	0.75	Molecular Function	GO:0044547	DNA topoisomerase binding	0.000466483	0.00903711	0	0	3	4
GO:0052717 tRNA-specific adenosine-34 deaminase activity	3	0.000466483	0.24	0.75	Molecular Function	GO:0052717	tRNA-specific adenosine-34 deaminase activity	0.000466483	0.00903711	0	0	3	4
GO:0070042 rRNA (uridine-N3-)-methyltransferase activity	3	0.000466483	0.24	0.75	Molecular Function	GO:0070042	rRNA (uridine-N3-)-methyltransferase activity	0.000466483	0.00903711	0	0	3	4
GO:0034284 response to monosaccharide	21	0.000469399	1.559	0.112	Biological Process	GO:0034284	response to monosaccharide	0.000469399	0.0154746	0	0	21	188
GO:0003407 neural retina development	3	0.000474511	0.223	0.75	Biological Process	GO:0003407	neural retina development	0.000474511	0.0154746	0	0	3	4
GO:0021510 spinal cord development	3	0.000474511	0.223	0.75	Biological Process	GO:0021510	spinal cord development	0.000474511	0.0154746	0	0	3	4
GO:0021515 cell differentiation in spinal cord	3	0.000474511	0.223	0.75	Biological Process	GO:0021515	cell differentiation in spinal cord	0.000474511	0.0154746	0	0	3	4
GO:0021517 ventral spinal cord development	3	0.000474511	0.223	0.75	Biological Process	GO:0021517	ventral spinal cord development	0.000474511	0.0154746	0	0	3	4
GO:0021522 spinal cord motor neuron differentiation	3	0.000474511	0.223	0.75	Biological Process	GO:0021522	spinal cord motor neuron differentiation	0.000474511	0.0154746	0	0	3	4
GO:0032202 telomere assembly	3	0.000474511	0.223	0.75	Biological Process	GO:0032202	telomere assembly	0.000474511	0.0154746	0	0	3	4
GO:0032203 telomere formation via telomerase	3	0.000474511	0.223	0.75	Biological Process	GO:0032203	telomere formation via telomerase	0.000474511	0.0154746	0	0	3	4
GO:0043010 camera-type eye development	3	0.000474511	0.223	0.75	Biological Process	GO:0043010	camera-type eye development	0.000474511	0.0154746	0	0	3	4
GO:0060041 retina development in camera-type eye	3	0.000474511	0.223	0.75	Biological Process	GO:0060041	retina development in camera-type eye	0.000474511	0.0154746	0	0	3	4
GO:0090666 scaRNA localization to Cajal body	3	0.000474511	0.223	0.75	Biological Process	GO:0090666	scaRNA localization to Cajal body	0.000474511	0.0154746	0	0	3	4
GO:0006066 alcohol metabolic process	41	0.000477398	3.044	0.086	Biological Process	GO:0006066	alcohol metabolic process	0.000477398	0.0154746	0	0	41	475
GO:0005977 glycogen metabolic process	12	0.000514629	0.891	0.152	Biological Process	GO:0005977	glycogen metabolic process	0.000514629	0.0163862	0	0	12	79
GO:0006112 energy reserve metabolic process	12	0.000514629	0.891	0.152	Biological Process	GO:0006112	energy reserve metabolic process	0.000514629	0.0163862	0	0	12	79
GO:0009308 amine metabolic process	32	0.000523193	2.376	0.093	Biological Process	GO:0009308	amine metabolic process	0.000523193	0.0165127	0	0	32	343
GO:0099503 secretory vesicle	11	0.000548512	0.847	0.157	Cellular Component	GO:0099503	secretory vesicle	0.000548512	0.0213876	0	0	11	70
GO:0006646 phosphatidylethanolamine biosynthetic process	7	0.000554073	0.52	0.233	Biological Process	GO:0006646	phosphatidylethanolamine biosynthetic process	0.000554073	0.0173352	0	0	7	30
GO:0009902 chloroplast relocation	11	0.000571987	0.817	0.159	Biological Process	GO:0009902	chloroplast relocation	0.000571987	0.0174407	0	0	11	69
GO:0009903 chloroplast avoidance movement	11	0.000571987	0.817	0.159	Biological Process	GO:0009903	chloroplast avoidance movement	0.000571987	0.0174407	0	0	11	69
GO:0051667 establishment of plastid localization	11	0.000571987	0.817	0.159	Biological Process	GO:0051667	establishment of plastid localization	0.000571987	0.0174407	0	0	11	69
GO:0031324 negative regulation of cellular metabolic process	99	0.00057749	7.35	0.069	Biological Process	GO:0031324	negative regulation of cellular metabolic process	0.00057749	0.0174606	0	0	99	1431
GO:0004843 thiol-dependent ubiquitin-specific protease activity	9	0.000594836	0.719	0.184	Molecular Function	GO:0004843	thiol-dependent ubiquitin-specific protease activity	0.000594836	0.0113316	0	0	9	49
GO:0031306 intrinsic component of mitochondrial outer membrane	8	0.000599304	0.616	0.2	Cellular Component	GO:0031306	intrinsic component of mitochondrial outer membrane	0.000599304	0.0213876	0	0	8	40
GO:0031307 integral component of mitochondrial outer membrane	8	0.000599304	0.616	0.2	Cellular Component	GO:0031307	integral component of mitochondrial outer membrane	0.000599304	0.0213876	0	0	8	40
GO:0044070 regulation of anion transport	9	0.000620445	0.668	0.184	Biological Process	GO:0044070	regulation of anion transport	0.000620445	0.018603	0	0	9	49
GO:1901672 positive regulation of systemic acquired resistance	4	0.000630402	0.297	0.444	Biological Process	GO:1901672	positive regulation of systemic acquired resistance	0.000630402	0.0187453	0	0	4	9
GO:0022898 regulation of transmembrane transporter activity	11	0.000648545	0.817	0.157	Biological Process	GO:0022898	regulation of transmembrane transporter activity	0.000648545	0.0188183	0	0	11	70
GO:0032409 regulation of transporter activity	11	0.000648545	0.817	0.157	Biological Process	GO:0032409	regulation of transporter activity	0.000648545	0.0188183	0	0	11	70
GO:0032412 regulation of ion transmembrane transporter activity	11	0.000648545	0.817	0.157	Biological Process	GO:0032412	regulation of ion transmembrane transporter activity	0.000648545	0.0188183	0	0	11	70
GO:0030286 dynein complex	6	0.000658215	0.462	0.261	Cellular Component	GO:0030286	dynein complex	0.000658215	0.0221083	0	0	6	23
GO:0006828 manganese ion transport	8	0.000684292	0.594	0.2	Biological Process	GO:0006828	manganese ion transport	0.000684292	0.0196967	0	0	8	40
GO:0016810 hydrolase activity, acting on carbon-nitrogen (but not peptide) bonds	25	0.000701119	1.998	0.1	Molecular Function	GO:0016810	hydrolase activity, acting on carbon-nitrogen (but not peptide) bonds	0.000701119	0.0131374	0	0	25	250
GO:0006714 sesquiterpenoid metabolic process	14	0.000712193	1.039	0.133	Biological Process	GO:0006714	sesquiterpenoid metabolic process	0.000712193	0.0203371	0	0	14	105
GO:0031012 extracellular matrix	8	0.000713092	0.616	0.195	Cellular Component	GO:0031012	extracellular matrix	0.000713092	0.0225708	0	0	8	41
GO:0019750 chloroplast localization	11	0.000733441	0.817	0.155	Biological Process	GO:0019750	chloroplast localization	0.000733441	0.0206166	0	0	11	71
GO:0051644 plastid localization	11	0.000733441	0.817	0.155	Biological Process	GO:0051644	plastid localization	0.000733441	0.0206166	0	0	11	71
GO:0005694 chromosome	66	0.000760757	5.081	0.073	Cellular Component	GO:0005694	chromosome	0.000760757	0.0225708	0	0	66	904
GO:0000793 condensed chromosome	17	0.000790572	1.309	0.116	Cellular Component	GO:0000793	condensed chromosome	0.000790572	0.0225708	0	0	17	146
GO:0004175 endopeptidase activity	41	0.00081407	3.277	0.084	Molecular Function	GO:0004175	endopeptidase activity	0.00081407	0.0150078	0	0	41	491
GO:0034502 protein localization to chromosome	7	0.000839701	0.52	0.219	Biological Process	GO:0034502	protein localization to chromosome	0.000839701	0.0232403	0	0	7	32
GO:0046337 phosphatidylethanolamine metabolic process	7	0.000839701	0.52	0.219	Biological Process	GO:0046337	phosphatidylethanolamine metabolic process	0.000839701	0.0232403	0	0	7	32
GO:0051053 negative regulation of DNA metabolic process	14	0.000861077	1.039	0.131	Biological Process	GO:0051053	negative regulation of DNA metabolic process	0.000861077	0.0236501	0	0	14	107
GO:0044428 nuclear part	188	0.000903301	14.473	0.061	Cellular Component	GO:0044428	nuclear part	0.000903301	0.022774	0	0	188	3101
GO:0043878 glyceraldehyde-3-phosphate dehydrogenase (NAD+) (non-phosphorylating) activity	6	0.000907158	0.48	0.25	Molecular Function	GO:0043878	glyceraldehyde-3-phosphate dehydrogenase (NAD+) (non-phosphorylating) activity	0.000907158	0.0164584	0	0	6	24
GO:1901701 cellular response to oxygen-containing compound	113	0.000958722	8.389	0.067	Biological Process	GO:1901701	cellular response to oxygen-containing compound	0.000958722	0.0261324	0	0	113	1697
GO:0070646 protein modification by small protein removal	17	0.000986196	1.262	0.116	Biological Process	GO:0070646	protein modification by small protein removal	0.000986196	0.0266792	0	0	17	146
GO:0003824 catalytic activity	792	0.00100155	63.309	0.053	Molecular Function	GO:0003824	catalytic activity	0.00100155	0.017887	0	0	792	14933
GO:1902446 regulation of shade avoidance	4	0.00100929	0.297	0.4	Biological Process	GO:1902446	regulation of shade avoidance	0.00100929	0.0269967	0	0	4	10
GO:0051347 positive regulation of transferase activity	23	0.00101851	1.707	0.101	Biological Process	GO:0051347	positive regulation of transferase activity	0.00101851	0.0269967	0	0	23	227
GO:0002244 hematopoietic progenitor cell differentiation	7	0.00102044	0.52	0.212	Biological Process	GO:0002244	hematopoietic progenitor cell differentiation	0.00102044	0.0269967	0	0	7	33
GO:0043547 positive regulation of GTPase activity	19	0.00104813	1.411	0.11	Biological Process	GO:0043547	positive regulation of GTPase activity	0.00104813	0.0275267	0	0	19	173
GO:0051172 negative regulation of nitrogen compound metabolic process	92	0.0010562	6.83	0.069	Biological Process	GO:0051172	negative regulation of nitrogen compound metabolic process	0.0010562	0.0275377	0	0	92	1337
GO:0008623 CHRAC	3	0.00107688	0.231	0.6	Cellular Component	GO:0008623	CHRAC	0.00107688	0.022774	0	0	3	5
GO:0016590 ACF complex	3	0.00107688	0.231	0.6	Cellular Component	GO:0016590	ACF complex	0.00107688	0.022774	0	0	3	5
GO:0031513 nonmotile primary cilium	3	0.00107688	0.231	0.6	Cellular Component	GO:0031513	nonmotile primary cilium	0.00107688	0.022774	0	0	3	5
GO:0032391 photoreceptor connecting cilium	3	0.00107688	0.231	0.6	Cellular Component	GO:0032391	photoreceptor connecting cilium	0.00107688	0.022774	0	0	3	5
GO:0035869 ciliary transition zone	3	0.00107688	0.231	0.6	Cellular Component	GO:0035869	ciliary transition zone	0.00107688	0.022774	0	0	3	5
GO:0072372 primary cilium	3	0.00107688	0.231	0.6	Cellular Component	GO:0072372	primary cilium	0.00107688	0.022774	0	0	3	5
GO:0009851 auxin biosynthetic process	12	0.00111685	0.891	0.14	Biological Process	GO:0009851	auxin biosynthetic process	0.00111685	0.0289095	0	0	12	86
GO:0003985 acetyl-CoA C-acetyltransferase activity	3	0.00112311	0.24	0.6	Molecular Function	GO:0003985	acetyl-CoA C-acetyltransferase activity	0.00112311	0.0194502	0	0	3	5
GO:0016453 C-acetyltransferase activity	3	0.00112311	0.24	0.6	Molecular Function	GO:0016453	C-acetyltransferase activity	0.00112311	0.0194502	0	0	3	5
GO:0071588 hydrogen peroxide mediated signaling pathway	5	0.00113745	0.371	0.294	Biological Process	GO:0071588	hydrogen peroxide mediated signaling pathway	0.00113745	0.0289406	0	0	5	17
GO:0010424 DNA methylation on cytosine within a CG sequence	3	0.00114218	0.223	0.6	Biological Process	GO:0010424	DNA methylation on cytosine within a CG sequence	0.00114218	0.0289406	0	0	3	5
GO:0051457 maintenance of protein location in nucleus	3	0.00114218	0.223	0.6	Biological Process	GO:0051457	maintenance of protein location in nucleus	0.00114218	0.0289406	0	0	3	5
GO:0008094 DNA-dependent ATPase activity	18	0.00114803	1.439	0.111	Molecular Function	GO:0008094	DNA-dependent ATPase activity	0.00114803	0.019585	0	0	18	162
GO:0044092 negative regulation of molecular function	35	0.00121776	2.598	0.086	Biological Process	GO:0044092	negative regulation of molecular function	0.00121776	0.0306399	0	0	35	406
GO:0044255 cellular lipid metabolic process	104	0.00128807	7.721	0.067	Biological Process	GO:0044255	cellular lipid metabolic process	0.00128807	0.0321839	0	0	104	1554
GO:0061158 3'-UTR-mediated mRNA destabilization	8	0.00132219	0.594	0.182	Biological Process	GO:0061158	3'-UTR-mediated mRNA destabilization	0.00132219	0.0322738	0	0	8	44
GO:0016143 S-glycoside metabolic process	16	0.00132755	1.188	0.117	Biological Process	GO:0016143	S-glycoside metabolic process	0.00132755	0.0322738	0	0	16	137
GO:0019757 glycosinolate metabolic process	16	0.00132755	1.188	0.117	Biological Process	GO:0019757	glycosinolate metabolic process	0.00132755	0.0322738	0	0	16	137
GO:0019760 glucosinolate metabolic process	16	0.00132755	1.188	0.117	Biological Process	GO:0019760	glucosinolate metabolic process	0.00132755	0.0322738	0	0	16	137
GO:0048581 negative regulation of post-embryonic development	24	0.00135258	1.782	0.098	Biological Process	GO:0048581	negative regulation of post-embryonic development	0.00135258	0.0326615	0	0	24	246
GO:0051346 negative regulation of hydrolase activity	17	0.00143286	1.262	0.113	Biological Process	GO:0051346	negative regulation of hydrolase activity	0.00143286	0.0343696	0	0	17	151
GO:0031177 phosphopantetheine binding	5	0.00147229	0.4	0.278	Molecular Function	GO:0031177	phosphopantetheine binding	0.00147229	0.0247475	0	0	5	18
GO:0052547 regulation of peptidase activity	12	0.00151274	0.891	0.135	Biological Process	GO:0052547	regulation of peptidase activity	0.00151274	0.0358313	0	0	12	89
GO:0009786 regulation of asymmetric cell division	4	0.00152368	0.297	0.364	Biological Process	GO:0009786	regulation of asymmetric cell division	0.00152368	0.0358313	0	0	4	11
GO:0010581 regulation of starch biosynthetic process	4	0.00152368	0.297	0.364	Biological Process	GO:0010581	regulation of starch biosynthetic process	0.00152368	0.0358313	0	0	4	11
GO:0031461 cullin-RING ubiquitin ligase complex	30	0.00155485	2.309	0.087	Cellular Component	GO:0031461	cullin-RING ubiquitin ligase complex	0.00155485	0.0317077	0	0	30	343
GO:0009740 gibberellic acid mediated signaling pathway	20	0.00170736	1.485	0.103	Biological Process	GO:0009740	gibberellic acid mediated signaling pathway	0.00170736	0.0396328	0	0	20	194
GO:0010476 gibberellin mediated signaling pathway	20	0.00170736	1.485	0.103	Biological Process	GO:0010476	gibberellin mediated signaling pathway	0.00170736	0.0396328	0	0	20	194
GO:0000778 condensed nuclear chromosome kinetochore	5	0.00179959	0.385	0.263	Cellular Component	GO:0000778	condensed nuclear chromosome kinetochore	0.00179959	0.0350562	0	0	5	19
GO:0000151 ubiquitin ligase complex	37	0.00184183	2.848	0.081	Cellular Component	GO:0000151	ubiquitin ligase complex	0.00184183	0.0350562	0	0	37	456
GO:0016579 protein deubiquitination	14	0.00189563	1.039	0.121	Biological Process	GO:0016579	protein deubiquitination	0.00189563	0.0436118	0	0	14	116
GO:0000018 regulation of DNA recombination	9	0.00190302	0.668	0.158	Biological Process	GO:0000018	regulation of DNA recombination	0.00190302	0.0436118	0	0	9	57
GO:0000035 acyl binding	5	0.00191732	0.4	0.263	Molecular Function	GO:0000035	acyl binding	0.00191732	0.0313728	0	0	5	19
GO:0071215 cellular response to abscisic acid stimulus	50	0.00191813	3.712	0.076	Biological Process	GO:0071215	cellular response to abscisic acid stimulus	0.00191813	0.0436658	0	0	50	655
GO:0036459 thiol-dependent ubiquitinyl hydrolase activity	12	0.00192134	0.959	0.13	Molecular Function	GO:0036459	thiol-dependent ubiquitinyl hydrolase activity	0.00192134	0.0313728	0	0	12	92
GO:0071370 cellular response to gibberellin stimulus	20	0.00192964	1.485	0.102	Biological Process	GO:0071370	cellular response to gibberellin stimulus	0.00192964	0.0436658	0	0	20	196
GO:0008610 lipid biosynthetic process	83	0.0020327	6.162	0.069	Biological Process	GO:0008610	lipid biosynthetic process	0.0020327	0.0454421	0	0	83	1211
GO:0071396 cellular response to lipid	72	0.0020334	5.345	0.07	Biological Process	GO:0071396	cellular response to lipid	0.0020334	0.0454421	0	0	72	1023
GO:0019783 ubiquitin-like protein-specific protease activity	13	0.00204745	1.039	0.124	Molecular Function	GO:0019783	ubiquitin-like protein-specific protease activity	0.00204745	0.0325366	0	0	13	105
GO:0000835 ER ubiquitin ligase complex	3	0.00207549	0.231	0.5	Cellular Component	GO:0000835	ER ubiquitin ligase complex	0.00207549	0.0370346	0	0	3	6
GO:0000836 Hrd1p ubiquitin ligase complex	3	0.00207549	0.231	0.5	Cellular Component	GO:0000836	Hrd1p ubiquitin ligase complex	0.00207549	0.0370346	0	0	3	6
GO:0101005 ubiquitinyl hydrolase activity	12	0.0021087	0.959	0.129	Molecular Function	GO:0101005	ubiquitinyl hydrolase activity	0.0021087	0.0325366	0	0	12	93
GO:1901615 organic hydroxy compound metabolic process	52	0.00212949	3.86	0.075	Biological Process	GO:1901615	organic hydroxy compound metabolic process	0.00212949	0.0471689	0	0	52	691
GO:0071229 cellular response to acid chemical	82	0.00213689	6.088	0.069	Biological Process	GO:0071229	cellular response to acid chemical	0.00213689	0.0471689	0	0	82	1196
GO:0003917 DNA topoisomerase type I activity	4	0.00214969	0.32	0.333	Molecular Function	GO:0003917	DNA topoisomerase type I activity	0.00214969	0.0325366	0	0	4	12
GO:0048534 hematopoietic or lymphoid organ development	9	0.00215477	0.668	0.155	Biological Process	GO:0048534	hematopoietic or lymphoid organ development	0.00215477	0.0472736	0	0	9	58
GO:0016436 rRNA (uridine) methyltransferase activity	3	0.00216342	0.24	0.5	Molecular Function	GO:0016436	rRNA (uridine) methyltransferase activity	0.00216342	0.0325366	0	0	3	6
GO:0033707 3''-deamino-3''-oxonicotianamine reductase activity	3	0.00216342	0.24	0.5	Molecular Function	GO:0033707	3''-deamino-3''-oxonicotianamine reductase activity	0.00216342	0.0325366	0	0	3	6
GO:1990381 ubiquitin-specific protease binding	3	0.00216342	0.24	0.5	Molecular Function	GO:1990381	ubiquitin-specific protease binding	0.00216342	0.0325366	0	0	3	6
GO:0034224 cellular response to zinc ion starvation	3	0.00219966	0.223	0.5	Biological Process	GO:0034224	cellular response to zinc ion starvation	0.00219966	0.0473915	0	0	3	6
GO:0048096 chromatin-mediated maintenance of transcription	3	0.00219966	0.223	0.5	Biological Process	GO:0048096	chromatin-mediated maintenance of transcription	0.00219966	0.0473915	0	0	3	6
GO:0080006 internode patterning	3	0.00219966	0.223	0.5	Biological Process	GO:0080006	internode patterning	0.00219966	0.0473915	0	0	3	6
GO:0032269 negative regulation of cellular protein metabolic process	40	0.00229649	2.97	0.08	Biological Process	GO:0032269	negative regulation of cellular protein metabolic process	0.00229649	0.0491832	0	0	40	500
GO:0000036 ACP phosphopantetheine attachment site binding involved in fatty acid biosynthetic process	5	0.00245321	0.4	0.25	Molecular Function	GO:0000036	ACP phosphopantetheine attachment site binding involved in fatty acid biosynthetic process	0.00245321	0.0346175	0	0	5	20
GO:0009041 uridylate kinase activity	5	0.00245321	0.4	0.25	Molecular Function	GO:0009041	uridylate kinase activity	0.00245321	0.0346175	0	0	5	20
GO:0019789 SUMO transferase activity	5	0.00245321	0.4	0.25	Molecular Function	GO:0019789	SUMO transferase activity	0.00245321	0.0346175	0	0	5	20
GO:0044620 ACP phosphopantetheine attachment site binding	5	0.00245321	0.4	0.25	Molecular Function	GO:0044620	ACP phosphopantetheine attachment site binding	0.00245321	0.0346175	0	0	5	20
GO:0051192 prosthetic group binding	5	0.00245321	0.4	0.25	Molecular Function	GO:0051192	prosthetic group binding	0.00245321	0.0346175	0	0	5	20
GO:0045770 positive regulation of asymmetric cell division	2	0.00247796	0.148	1	Biological Process	GO:0045770	positive regulation of asymmetric cell division	0.00247796	0.0524453	0	0	2	2
GO:0048103 somatic stem cell division	2	0.00247796	0.148	1	Biological Process	GO:0048103	somatic stem cell division	0.00247796	0.0524453	0	0	2	2
GO:0006290 pyrimidine dimer repair	5	0.0025161	0.371	0.25	Biological Process	GO:0006290	pyrimidine dimer repair	0.0025161	0.0529412	0	0	5	20
GO:0004867 serine-type endopeptidase inhibitor activity	7	0.00274208	0.56	0.179	Molecular Function	GO:0004867	serine-type endopeptidase inhibitor activity	0.00274208	0.0382219	0	0	7	39
GO:0043087 regulation of GTPase activity	20	0.00274865	1.485	0.099	Biological Process	GO:0043087	regulation of GTPase activity	0.00274865	0.0574979	0	0	20	202
GO:0006310 DNA recombination	30	0.00284584	2.227	0.086	Biological Process	GO:0006310	DNA recombination	0.00284584	0.0591869	0	0	30	350
GO:0000780 condensed nuclear chromosome, centromeric region	6	0.00289114	0.462	0.2	Cellular Component	GO:0000780	condensed nuclear chromosome, centromeric region	0.00289114	0.0500255	0	0	6	30
GO:0030414 peptidase inhibitor activity	9	0.00295485	0.719	0.148	Molecular Function	GO:0030414	peptidase inhibitor activity	0.00295485	0.0406915	0	0	9	61
GO:0044427 chromosomal part	54	0.00302801	4.157	0.072	Cellular Component	GO:0044427	chromosomal part	0.00302801	0.0508527	0	0	54	751
GO:0010069 zygote asymmetric cytokinesis in embryo sac	4	0.00304752	0.297	0.308	Biological Process	GO:0010069	zygote asymmetric cytokinesis in embryo sac	0.00304752	0.062301	0	0	4	13
GO:0010070 zygote asymmetric cell division	4	0.00304752	0.297	0.308	Biological Process	GO:0010070	zygote asymmetric cell division	0.00304752	0.062301	0	0	4	13
GO:0010617 circadian regulation of calcium ion oscillation	4	0.00304752	0.297	0.308	Biological Process	GO:0010617	circadian regulation of calcium ion oscillation	0.00304752	0.062301	0	0	4	13
GO:0052548 regulation of endopeptidase activity	11	0.0032478	0.817	0.129	Biological Process	GO:0052548	regulation of endopeptidase activity	0.0032478	0.0657363	0	0	11	85
GO:0006349 regulation of gene expression by genetic imprinting	7	0.00328864	0.52	0.175	Biological Process	GO:0006349	regulation of gene expression by genetic imprinting	0.00328864	0.0657363	0	0	7	40
GO:0010112 regulation of systemic acquired resistance	7	0.00328864	0.52	0.175	Biological Process	GO:0010112	regulation of systemic acquired resistance	0.00328864	0.0657363	0	0	7	40
GO:0071514 genetic imprinting	7	0.00328864	0.52	0.175	Biological Process	GO:0071514	genetic imprinting	0.00328864	0.0657363	0	0	7	40
GO:0051248 negative regulation of protein metabolic process	40	0.00335956	2.97	0.078	Biological Process	GO:0051248	negative regulation of protein metabolic process	0.00335956	0.0667829	0	0	40	511
GO:0097458 neuron part	18	0.00337187	1.386	0.099	Cellular Component	GO:0097458	neuron part	0.00337187	0.0550097	0	0	18	181
GO:0016772 transferase activity, transferring phosphorus-containing groups	162	0.00355296	12.95	0.061	Molecular Function	GO:0016772	transferase activity, transferring phosphorus-containing groups	0.00355296	0.0483457	0	0	162	2671
GO:0005680 anaphase-promoting complex	5	0.00360844	0.385	0.227	Cellular Component	GO:0005680	anaphase-promoting complex	0.00360844	0.0556871	0	0	5	22
GO:0005868 cytoplasmic dynein complex	5	0.00360844	0.385	0.227	Cellular Component	GO:0005868	cytoplasmic dynein complex	0.00360844	0.0556871	0	0	5	22
GO:0000041 transition metal ion transport	17	0.00367212	1.262	0.103	Biological Process	GO:0000041	transition metal ion transport	0.00367212	0.0713261	0	0	17	165
GO:0050734 hydroxycinnamoyltransferase activity	7	0.00367837	0.56	0.171	Molecular Function	GO:0050734	hydroxycinnamoyltransferase activity	0.00367837	0.0494633	0	0	7	41
GO:0042461 photoreceptor cell development	3	0.00370705	0.223	0.429	Biological Process	GO:0042461	photoreceptor cell development	0.00370705	0.0713261	0	0	3	7
GO:0042462 eye photoreceptor cell development	3	0.00370705	0.223	0.429	Biological Process	GO:0042462	eye photoreceptor cell development	0.00370705	0.0713261	0	0	3	7
GO:0090670 RNA localization to Cajal body	3	0.00370705	0.223	0.429	Biological Process	GO:0090670	RNA localization to Cajal body	0.00370705	0.0713261	0	0	3	7
GO:0090671 telomerase RNA localization to Cajal body	3	0.00370705	0.223	0.429	Biological Process	GO:0090671	telomerase RNA localization to Cajal body	0.00370705	0.0713261	0	0	3	7
GO:0090672 telomerase RNA localization	3	0.00370705	0.223	0.429	Biological Process	GO:0090672	telomerase RNA localization	0.00370705	0.0713261	0	0	3	7
GO:0030234 enzyme regulator activity	45	0.0037639	3.597	0.075	Molecular Function	GO:0030234	enzyme regulator activity	0.0037639	0.0500249	0	0	45	599
GO:0071103 DNA conformation change	27	0.0037731	2.004	0.087	Biological Process	GO:0071103	DNA conformation change	0.0037731	0.0722108	0	0	27	311
GO:0010466 negative regulation of peptidase activity	9	0.00383777	0.668	0.143	Biological Process	GO:0010466	negative regulation of peptidase activity	0.00383777	0.072561	0	0	9	63
GO:0051959 dynein light intermediate chain binding	5	0.00383781	0.4	0.227	Molecular Function	GO:0051959	dynein light intermediate chain binding	0.00383781	0.0504209	0	0	5	22
GO:2000574 regulation of microtubule motor activity	5	0.00393427	0.371	0.227	Biological Process	GO:2000574	regulation of microtubule motor activity	0.00393427	0.072561	0	0	5	22
GO:2000576 positive regulation of microtubule motor activity	5	0.00393427	0.371	0.227	Biological Process	GO:2000576	positive regulation of microtubule motor activity	0.00393427	0.072561	0	0	5	22
GO:2000580 regulation of ATP-dependent microtubule motor activity, plus-end-directed	5	0.00393427	0.371	0.227	Biological Process	GO:2000580	regulation of ATP-dependent microtubule motor activity, plus-end-directed	0.00393427	0.072561	0	0	5	22
GO:2000582 positive regulation of ATP-dependent microtubule motor activity, plus-end-directed	5	0.00393427	0.371	0.227	Biological Process	GO:2000582	positive regulation of ATP-dependent microtubule motor activity, plus-end-directed	0.00393427	0.072561	0	0	5	22
GO:0055082 cellular chemical homeostasis	32	0.00394811	2.376	0.082	Biological Process	GO:0055082	cellular chemical homeostasis	0.00394811	0.072561	0	0	32	389
GO:0050779 RNA destabilization	8	0.00395274	0.594	0.154	Biological Process	GO:0050779	RNA destabilization	0.00395274	0.072561	0	0	8	52
GO:0061157 mRNA destabilization	8	0.00395274	0.594	0.154	Biological Process	GO:0061157	mRNA destabilization	0.00395274	0.072561	0	0	8	52
GO:0019252 starch biosynthetic process	12	0.00406539	0.891	0.12	Biological Process	GO:0019252	starch biosynthetic process	0.00406539	0.0737539	0	0	12	100
GO:0051382 kinetochore assembly	4	0.00409972	0.297	0.286	Biological Process	GO:0051382	kinetochore assembly	0.00409972	0.0737539	0	0	4	14
GO:0051383 kinetochore organization	4	0.00409972	0.297	0.286	Biological Process	GO:0051383	kinetochore organization	0.00409972	0.0737539	0	0	4	14
GO:0070979 protein K11-linked ubiquitination	4	0.00409972	0.297	0.286	Biological Process	GO:0070979	protein K11-linked ubiquitination	0.00409972	0.0737539	0	0	4	14
GO:0009813 flavonoid biosynthetic process	23	0.0043119	1.707	0.091	Biological Process	GO:0009813	flavonoid biosynthetic process	0.0043119	0.0771852	0	0	23	254
GO:0005844 polysome	17	0.00432195	1.309	0.099	Cellular Component	GO:0005844	polysome	0.00432195	0.0649429	0	0	17	171
GO:0009750 response to fructose	10	0.00434683	0.742	0.132	Biological Process	GO:0009750	response to fructose	0.00434683	0.0774253	0	0	10	76
GO:0090501 RNA phosphodiester bond hydrolysis	25	0.00454206	1.856	0.088	Biological Process	GO:0090501	RNA phosphodiester bond hydrolysis	0.00454206	0.080504	0	0	25	285
GO:0061134 peptidase regulator activity	9	0.00456866	0.719	0.138	Molecular Function	GO:0061134	peptidase regulator activity	0.00456866	0.059118	0	0	9	65
GO:0019899 enzyme binding	72	0.00465641	5.755	0.068	Molecular Function	GO:0019899	enzyme binding	0.00465641	0.059118	0	0	72	1065
GO:0005096 GTPase activator activity	16	0.00468216	1.279	0.103	Molecular Function	GO:0005096	GTPase activator activity	0.00468216	0.059118	0	0	16	156
GO:0045505 dynein intermediate chain binding	5	0.00470668	0.4	0.217	Molecular Function	GO:0045505	dynein intermediate chain binding	0.00470668	0.059118	0	0	5	23
GO:0006650 glycerophospholipid metabolic process	26	0.00471948	1.93	0.086	Biological Process	GO:0006650	glycerophospholipid metabolic process	0.00471948	0.0832386	0	0	26	301
GO:0010222 stem vascular tissue pattern formation	5	0.00482381	0.371	0.217	Biological Process	GO:0010222	stem vascular tissue pattern formation	0.00482381	0.0846638	0	0	5	23
GO:0009862 systemic acquired resistance, salicylic acid mediated signaling pathway	7	0.00499461	0.52	0.163	Biological Process	GO:0009862	systemic acquired resistance, salicylic acid mediated signaling pathway	0.00499461	0.0872359	0	0	7	43
GO:0000930 gamma-tubulin complex	4	0.00500081	0.308	0.267	Cellular Component	GO:0000930	gamma-tubulin complex	0.00500081	0.0700545	0	0	4	15
GO:0030145 manganese ion binding	10	0.00503374	0.799	0.128	Molecular Function	GO:0030145	manganese ion binding	0.00503374	0.0625388	0	0	10	78
GO:0005677 chromatin silencing complex	7	0.00510345	0.539	0.159	Cellular Component	GO:0005677	chromatin silencing complex	0.00510345	0.0700545	0	0	7	44
GO:0060589 nucleoside-triphosphatase regulator activity	18	0.00519814	1.439	0.097	Molecular Function	GO:0060589	nucleoside-triphosphatase regulator activity	0.00519814	0.0638868	0	0	18	186
GO:0009640 photomorphogenesis	18	0.00522028	1.336	0.097	Biological Process	GO:0009640	photomorphogenesis	0.00522028	0.090737	0	0	18	185
GO:0010817 regulation of hormone levels	60	0.00526262	4.454	0.07	Biological Process	GO:0010817	regulation of hormone levels	0.00526262	0.0910332	0	0	60	858
GO:0036513 Derlin-1 retrotranslocation complex	5	0.00537172	0.385	0.208	Cellular Component	GO:0036513	Derlin-1 retrotranslocation complex	0.00537172	0.0700545	0	0	5	24
GO:0031145 anaphase-promoting complex-dependent proteasomal ubiquitin-dependent protein catabolic process	4	0.00537236	0.297	0.267	Biological Process	GO:0031145	anaphase-promoting complex-dependent proteasomal ubiquitin-dependent protein catabolic process	0.00537236	0.0920464	0	0	4	15
GO:1901332 negative regulation of lateral root development	4	0.00537236	0.297	0.267	Biological Process	GO:1901332	negative regulation of lateral root development	0.00537236	0.0920464	0	0	4	15
GO:0036064 ciliary basal body	3	0.00539825	0.231	0.375	Cellular Component	GO:0036064	ciliary basal body	0.00539825	0.0700545	0	0	3	8
GO:0101002 ficolin-1-rich granule	3	0.00539825	0.231	0.375	Cellular Component	GO:0101002	ficolin-1-rich granule	0.00539825	0.0700545	0	0	3	8
GO:1904813 ficolin-1-rich granule lumen	3	0.00539825	0.231	0.375	Cellular Component	GO:1904813	ficolin-1-rich granule lumen	0.00539825	0.0700545	0	0	3	8
GO:0016832 aldehyde-lyase activity	7	0.00551406	0.56	0.159	Molecular Function	GO:0016832	aldehyde-lyase activity	0.00551406	0.0662338	0	0	7	44
GO:0004857 enzyme inhibitor activity	23	0.00557251	1.839	0.088	Molecular Function	GO:0004857	enzyme inhibitor activity	0.00557251	0.0662338	0	0	23	261
GO:0045861 negative regulation of proteolysis	12	0.00558411	0.891	0.115	Biological Process	GO:0045861	negative regulation of proteolysis	0.00558411	0.095221	0	0	12	104
GO:0032574 5'-3' RNA helicase activity	3	0.00562089	0.24	0.375	Molecular Function	GO:0032574	5'-3' RNA helicase activity	0.00562089	0.0662338	0	0	3	8
GO:0032575 ATP-dependent 5'-3' RNA helicase activity	3	0.00562089	0.24	0.375	Molecular Function	GO:0032575	ATP-dependent 5'-3' RNA helicase activity	0.00562089	0.0662338	0	0	3	8
GO:1901658 glycosyl compound catabolic process	7	0.00568939	0.52	0.159	Biological Process	GO:1901658	glycosyl compound catabolic process	0.00568939	0.095581	0	0	7	44
GO:0030258 lipid modification	23	0.00570813	1.707	0.088	Biological Process	GO:0030258	lipid modification	0.00570813	0.095581	0	0	23	260
GO:0002100 tRNA wobble adenosine to inosine editing	3	0.00571252	0.223	0.375	Biological Process	GO:0002100	tRNA wobble adenosine to inosine editing	0.00571252	0.095581	0	0	3	8
GO:0006382 adenosine to inosine editing	3	0.00571252	0.223	0.375	Biological Process	GO:0006382	adenosine to inosine editing	0.00571252	0.095581	0	0	3	8
GO:0009245 lipid A biosynthetic process	5	0.00584715	0.371	0.208	Biological Process	GO:0009245	lipid A biosynthetic process	0.00584715	0.095581	0	0	5	24
GO:0046493 lipid A metabolic process	5	0.00584715	0.371	0.208	Biological Process	GO:0046493	lipid A metabolic process	0.00584715	0.095581	0	0	5	24
GO:1901269 lipooligosaccharide metabolic process	5	0.00584715	0.371	0.208	Biological Process	GO:1901269	lipooligosaccharide metabolic process	0.00584715	0.095581	0	0	5	24
GO:1901271 lipooligosaccharide biosynthetic process	5	0.00584715	0.371	0.208	Biological Process	GO:1901271	lipooligosaccharide biosynthetic process	0.00584715	0.095581	0	0	5	24
GO:2000023 regulation of lateral root development	5	0.00584715	0.371	0.208	Biological Process	GO:2000023	regulation of lateral root development	0.00584715	0.095581	0	0	5	24
GO:0009812 flavonoid metabolic process	28	0.00587087	2.079	0.083	Biological Process	GO:0009812	flavonoid metabolic process	0.00587087	0.095581	0	0	28	337
GO:0006338 chromatin remodeling	17	0.00591294	1.262	0.098	Biological Process	GO:0006338	chromatin remodeling	0.00591294	0.0958322	0	0	17	173
GO:0098772 molecular function regulator	51	0.00593111	4.077	0.071	Molecular Function	GO:0098772	molecular function regulator	0.00593111	0.0691761	0	0	51	715
GO:0009892 negative regulation of metabolic process	119	0.00602533	8.834	0.062	Biological Process	GO:0009892	negative regulation of metabolic process	0.00602533	0.0972158	0	0	119	1905
GO:0072341 modified amino acid binding	7	0.00625665	0.56	0.156	Molecular Function	GO:0072341	modified amino acid binding	0.00625665	0.0722358	0	0	7	45
GO:0042743 hydrogen peroxide metabolic process	17	0.00625796	1.262	0.098	Biological Process	GO:0042743	hydrogen peroxide metabolic process	0.00625796	0.100519	0	0	17	174
GO:0005775 vacuolar lumen	5	0.00644912	0.385	0.2	Cellular Component	GO:0005775	vacuolar lumen	0.00644912	0.0717241	0	0	5	25
GO:0003860 3-hydroxyisobutyryl-CoA hydrolase activity	5	0.00684717	0.4	0.2	Molecular Function	GO:0003860	3-hydroxyisobutyryl-CoA hydrolase activity	0.00684717	0.0766334	0	0	5	25
GO:0045502 dynein binding	5	0.00684717	0.4	0.2	Molecular Function	GO:0045502	dynein binding	0.00684717	0.0766334	0	0	5	25
GO:0000328 fungal-type vacuole lumen	2	0.00690863	0.154	0.667	Cellular Component	GO:0000328	fungal-type vacuole lumen	0.00690863	0.0717241	0	0	2	3
GO:0001405 presequence translocase-associated import motor	2	0.00690863	0.154	0.667	Cellular Component	GO:0001405	presequence translocase-associated import motor	0.00690863	0.0717241	0	0	2	3
GO:0019034 viral replication complex	2	0.00690863	0.154	0.667	Cellular Component	GO:0019034	viral replication complex	0.00690863	0.0717241	0	0	2	3
GO:0033643 host cell part	2	0.00690863	0.154	0.667	Cellular Component	GO:0033643	host cell part	0.00690863	0.0717241	0	0	2	3
GO:0033646 host intracellular part	2	0.00690863	0.154	0.667	Cellular Component	GO:0033646	host intracellular part	0.00690863	0.0717241	0	0	2	3
GO:0033647 host intracellular organelle	2	0.00690863	0.154	0.667	Cellular Component	GO:0033647	host intracellular organelle	0.00690863	0.0717241	0	0	2	3
GO:0033648 host intracellular membrane-bounded organelle	2	0.00690863	0.154	0.667	Cellular Component	GO:0033648	host intracellular membrane-bounded organelle	0.00690863	0.0717241	0	0	2	3
GO:0042025 host cell nucleus	2	0.00690863	0.154	0.667	Cellular Component	GO:0042025	host cell nucleus	0.00690863	0.0717241	0	0	2	3
GO:0043656 intracellular region of host	2	0.00690863	0.154	0.667	Cellular Component	GO:0043656	intracellular region of host	0.00690863	0.0717241	0	0	2	3
GO:0044094 host cell nuclear part	2	0.00690863	0.154	0.667	Cellular Component	GO:0044094	host cell nuclear part	0.00690863	0.0717241	0	0	2	3
GO:0009893 positive regulation of metabolic process	134	0.00696087	9.948	0.061	Biological Process	GO:0009893	positive regulation of metabolic process	0.00696087	0.107752	0	0	134	2187
GO:0010117 photoprotection	5	0.00701418	0.371	0.2	Biological Process	GO:0010117	photoprotection	0.00701418	0.107752	0	0	5	25
GO:0010244 response to low fluence blue light stimulus by blue low-fluence system	5	0.00701418	0.371	0.2	Biological Process	GO:0010244	response to low fluence blue light stimulus by blue low-fluence system	0.00701418	0.107752	0	0	5	25
GO:0048768 root hair cell tip growth	5	0.00701418	0.371	0.2	Biological Process	GO:0048768	root hair cell tip growth	0.00701418	0.107752	0	0	5	25
GO:1904951 positive regulation of establishment of protein localization	11	0.00701732	0.817	0.117	Biological Process	GO:1904951	positive regulation of establishment of protein localization	0.00701732	0.107752	0	0	11	94
GO:0009850 auxin metabolic process	14	0.00702967	1.039	0.104	Biological Process	GO:0009850	auxin metabolic process	0.00702967	0.107752	0	0	14	134
GO:0008047 enzyme activator activity	21	0.00704214	1.679	0.089	Molecular Function	GO:0008047	enzyme activator activity	0.00704214	0.0766334	0	0	21	236
GO:0046982 protein heterodimerization activity	25	0.00706113	1.998	0.084	Molecular Function	GO:0046982	protein heterodimerization activity	0.00706113	0.0766334	0	0	25	297
GO:0004343 glucosamine 6-phosphate N-acetyltransferase activity	2	0.00710686	0.16	0.667	Molecular Function	GO:0004343	glucosamine 6-phosphate N-acetyltransferase activity	0.00710686	0.0766334	0	0	2	3
GO:0004463 leukotriene-A4 hydrolase activity	2	0.00710686	0.16	0.667	Molecular Function	GO:0004463	leukotriene-A4 hydrolase activity	0.00710686	0.0766334	0	0	2	3
GO:0010486 manganese:proton antiporter activity	2	0.00710686	0.16	0.667	Molecular Function	GO:0010486	manganese:proton antiporter activity	0.00710686	0.0766334	0	0	2	3
GO:0042788 polysomal ribosome	14	0.00717931	1.078	0.102	Cellular Component	GO:0042788	polysomal ribosome	0.00717931	0.0732033	0	0	14	137
GO:0006691 leukotriene metabolic process	2	0.00718744	0.148	0.667	Biological Process	GO:0006691	leukotriene metabolic process	0.00718744	0.107752	0	0	2	3
GO:0010184 cytokinin transport	2	0.00718744	0.148	0.667	Biological Process	GO:0010184	cytokinin transport	0.00718744	0.107752	0	0	2	3
GO:0019370 leukotriene biosynthetic process	2	0.00718744	0.148	0.667	Biological Process	GO:0019370	leukotriene biosynthetic process	0.00718744	0.107752	0	0	2	3
GO:0030595 leukocyte chemotaxis	2	0.00718744	0.148	0.667	Biological Process	GO:0030595	leukocyte chemotaxis	0.00718744	0.107752	0	0	2	3
GO:0048539 bone marrow development	2	0.00718744	0.148	0.667	Biological Process	GO:0048539	bone marrow development	0.00718744	0.107752	0	0	2	3
GO:0060326 cell chemotaxis	2	0.00718744	0.148	0.667	Biological Process	GO:0060326	cell chemotaxis	0.00718744	0.107752	0	0	2	3
GO:0071287 cellular response to manganese ion	2	0.00718744	0.148	0.667	Biological Process	GO:0071287	cellular response to manganese ion	0.00718744	0.107752	0	0	2	3
GO:1900370 positive regulation of RNA interference	2	0.00718744	0.148	0.667	Biological Process	GO:1900370	positive regulation of RNA interference	0.00718744	0.107752	0	0	2	3
GO:1903705 positive regulation of production of siRNA involved in RNA interference	2	0.00718744	0.148	0.667	Biological Process	GO:1903705	positive regulation of production of siRNA involved in RNA interference	0.00718744	0.107752	0	0	2	3
GO:1990440 positive regulation of transcription from RNA polymerase II promoter in response to endoplasmic reticulum stress	2	0.00718744	0.148	0.667	Biological Process	GO:1990440	positive regulation of transcription from RNA polymerase II promoter in response to endoplasmic reticulum stress	0.00718744	0.107752	0	0	2	3
GO:0008021 synaptic vesicle	5	0.00766934	0.385	0.192	Cellular Component	GO:0008021	synaptic vesicle	0.00766934	0.0755033	0	0	5	26
GO:0070382 exocytic vesicle	5	0.00766934	0.385	0.192	Cellular Component	GO:0070382	exocytic vesicle	0.00766934	0.0755033	0	0	5	26
GO:0030426 growth cone	3	0.00780538	0.231	0.333	Cellular Component	GO:0030426	growth cone	0.00780538	0.0755402	0	0	3	9
GO:0009699 phenylpropanoid biosynthetic process	20	0.00783749	1.485	0.09	Biological Process	GO:0009699	phenylpropanoid biosynthetic process	0.00783749	0.11701	0	0	20	222
GO:0043169 cation binding	372	0.0079933	29.736	0.055	Molecular Function	GO:0043169	cation binding	0.0079933	0.0851795	0	0	372	6754
GO:0003904 deoxyribodipyrimidine photo-lyase activity	3	0.00812298	0.24	0.333	Molecular Function	GO:0003904	deoxyribodipyrimidine photo-lyase activity	0.00812298	0.0851795	0	0	3	9
GO:0003988 acetyl-CoA C-acyltransferase activity	3	0.00812298	0.24	0.333	Molecular Function	GO:0003988	acetyl-CoA C-acyltransferase activity	0.00812298	0.0851795	0	0	3	9
GO:0080008 Cul4-RING E3 ubiquitin ligase complex	13	0.00813051	1.001	0.104	Cellular Component	GO:0080008	Cul4-RING E3 ubiquitin ligase complex	0.00813051	0.0773754	0	0	13	125
GO:0032881 regulation of polysaccharide metabolic process	6	0.00813566	0.445	0.167	Biological Process	GO:0032881	regulation of polysaccharide metabolic process	0.00813566	0.120959	0	0	6	36
GO:0051052 regulation of DNA metabolic process	27	0.00819186	2.004	0.082	Biological Process	GO:0051052	regulation of DNA metabolic process	0.00819186	0.121293	0	0	27	330
GO:0000719 photoreactive repair	3	0.00825358	0.223	0.333	Biological Process	GO:0000719	photoreactive repair	0.00825358	0.121707	0	0	3	9
GO:0004866 endopeptidase inhibitor activity	8	0.00830161	0.639	0.136	Molecular Function	GO:0004866	endopeptidase inhibitor activity	0.00830161	0.0862613	0	0	8	59
GO:0030968 endoplasmic reticulum unfolded protein response	5	0.00833451	0.371	0.192	Biological Process	GO:0030968	endoplasmic reticulum unfolded protein response	0.00833451	0.122398	0	0	5	26
GO:0080019 fatty-acyl-CoA reductase (alcohol-forming) activity	4	0.00848047	0.32	0.235	Molecular Function	GO:0080019	fatty-acyl-CoA reductase (alcohol-forming) activity	0.00848047	0.0865503	0	0	4	17
GO:0050897 cobalt ion binding	11	0.00848087	0.879	0.113	Molecular Function	GO:0050897	cobalt ion binding	0.00848087	0.0865503	0	0	11	97
GO:0030433 ER-associated ubiquitin-dependent protein catabolic process	9	0.00848672	0.668	0.127	Biological Process	GO:0030433	ER-associated ubiquitin-dependent protein catabolic process	0.00848672	0.124127	0	0	9	71
GO:0016614 oxidoreductase activity, acting on CH-OH group of donors	30	0.00862452	2.398	0.079	Molecular Function	GO:0016614	oxidoreductase activity, acting on CH-OH group of donors	0.00862452	0.0868809	0	0	30	381
GO:0009650 UV protection	4	0.00865234	0.297	0.235	Biological Process	GO:0009650	UV protection	0.00865234	0.124525	0	0	4	17
GO:0035336 long-chain fatty-acyl-CoA metabolic process	4	0.00865234	0.297	0.235	Biological Process	GO:0035336	long-chain fatty-acyl-CoA metabolic process	0.00865234	0.124525	0	0	4	17
GO:0048829 root cap development	4	0.00865234	0.297	0.235	Biological Process	GO:0048829	root cap development	0.00865234	0.124525	0	0	4	17
GO:2000904 regulation of starch metabolic process	4	0.00865234	0.297	0.235	Biological Process	GO:2000904	regulation of starch metabolic process	0.00865234	0.124525	0	0	4	17
GO:0008234 cysteine-type peptidase activity	17	0.00866529	1.359	0.094	Molecular Function	GO:0008234	cysteine-type peptidase activity	0.00866529	0.0868809	0	0	17	181
GO:0048518 positive regulation of biological process	193	0.00874592	14.328	0.059	Biological Process	GO:0048518	positive regulation of biological process	0.00874592	0.12537	0	0	193	3297
GO:0044711 single-organism biosynthetic process	228	0.00905702	16.927	0.058	Biological Process	GO:0044711	single-organism biosynthetic process	0.00905702	0.129314	0	0	228	3959
GO:0090351 seedling development	30	0.00933052	2.227	0.079	Biological Process	GO:0090351	seedling development	0.00933052	0.132236	0	0	30	381
GO:0006644 phospholipid metabolic process	36	0.00933514	2.673	0.075	Biological Process	GO:0006644	phospholipid metabolic process	0.00933514	0.132236	0	0	36	478
GO:0030695 GTPase regulator activity	16	0.00940014	1.279	0.095	Molecular Function	GO:0030695	GTPase regulator activity	0.00940014	0.0934292	0	0	16	168
GO:0032559 adenyl ribonucleotide binding	248	0.00958673	19.824	0.057	Molecular Function	GO:0032559	adenyl ribonucleotide binding	0.00958673	0.0944624	0	0	248	4373
GO:0005819 spindle	20	0.00965706	1.54	0.087	Cellular Component	GO:0005819	spindle	0.00965706	0.0901887	0	0	20	231
GO:0016682 oxidoreductase activity, acting on diphenols and related substances as donors, oxygen as acceptor	9	0.00977608	0.719	0.123	Molecular Function	GO:0016682	oxidoreductase activity, acting on diphenols and related substances as donors, oxygen as acceptor	0.00977608	0.0955047	0	0	9	73
GO:0000776 kinetochore	10	0.00979281	0.77	0.115	Cellular Component	GO:0000776	kinetochore	0.00979281	0.0901887	0	0	10	87
GO:0030554 adenyl nucleotide binding	248	0.0098892	19.824	0.057	Molecular Function	GO:0030554	adenyl nucleotide binding	0.0098892	0.0957912	0	0	248	4376
GO:0009845 seed germination	28	0.00995208	2.079	0.08	Biological Process	GO:0009845	seed germination	0.00995208	0.140422	0	0	28	351
GO:0031298 replication fork protection complex	4	0.00997689	0.308	0.222	Cellular Component	GO:0031298	replication fork protection complex	0.00997689	0.0904255	0	0	4	18
GO:0061135 endopeptidase regulator activity	8	0.0101125	0.639	0.131	Molecular Function	GO:0061135	endopeptidase regulator activity	0.0101125	0.0971313	0	0	8	61
GO:0010951 negative regulation of endopeptidase activity	8	0.0104512	0.594	0.131	Biological Process	GO:0010951	negative regulation of endopeptidase activity	0.0104512	0.146527	0	0	8	61
GO:0006259 DNA metabolic process	78	0.0104662	5.791	0.065	Biological Process	GO:0006259	DNA metabolic process	0.0104662	0.146527	0	0	78	1203
GO:0005737 cytoplasm	856	0.010476	65.897	0.051	Cellular Component	GO:0005737	cytoplasm	0.010476	0.0928826	0	0	856	16729
GO:0047458 beta-pyrazolylalanine synthase activity	4	0.0104828	0.32	0.222	Molecular Function	GO:0047458	beta-pyrazolylalanine synthase activity	0.0104828	0.0982119	0	0	4	18
GO:0050234 pyrazolylalanine synthase activity	4	0.0104828	0.32	0.222	Molecular Function	GO:0050234	pyrazolylalanine synthase activity	0.0104828	0.0982119	0	0	4	18
GO:0050461 L-mimosine synthase activity	4	0.0104828	0.32	0.222	Molecular Function	GO:0050461	L-mimosine synthase activity	0.0104828	0.0982119	0	0	4	18
GO:0009508 plastid chromosome	5	0.0105733	0.385	0.179	Cellular Component	GO:0009508	plastid chromosome	0.0105733	0.0928826	0	0	5	28
GO:0031507 heterochromatin assembly	6	0.0106007	0.445	0.158	Biological Process	GO:0031507	heterochromatin assembly	0.0106007	0.147834	0	0	6	38
GO:0000153 cytoplasmic ubiquitin ligase complex	3	0.0107495	0.231	0.3	Cellular Component	GO:0000153	cytoplasmic ubiquitin ligase complex	0.0107495	0.0929996	0	0	3	10
GO:0008283 cell proliferation	33	0.0108846	2.45	0.076	Biological Process	GO:0008283	cell proliferation	0.0108846	0.151208	0	0	33	434
GO:0051241 negative regulation of multicellular organismal process	29	0.011087	2.153	0.078	Biological Process	GO:0051241	negative regulation of multicellular organismal process	0.011087	0.152489	0	0	29	370
GO:0003886 DNA (cytosine-5-)-methyltransferase activity	3	0.011181	0.24	0.3	Molecular Function	GO:0003886	DNA (cytosine-5-)-methyltransferase activity	0.011181	0.100072	0	0	3	10
GO:0004645 phosphorylase activity	3	0.011181	0.24	0.3	Molecular Function	GO:0004645	phosphorylase activity	0.011181	0.100072	0	0	3	10
GO:0008251 tRNA-specific adenosine deaminase activity	3	0.011181	0.24	0.3	Molecular Function	GO:0008251	tRNA-specific adenosine deaminase activity	0.011181	0.100072	0	0	3	10
GO:0042802 identical protein binding	67	0.0111894	5.356	0.066	Molecular Function	GO:0042802	identical protein binding	0.0111894	0.100072	0	0	67	1019
GO:0016837 carbon-oxygen lyase activity, acting on polysaccharides	5	0.0112067	0.4	0.179	Molecular Function	GO:0016837	carbon-oxygen lyase activity, acting on polysaccharides	0.0112067	0.100072	0	0	5	28
GO:0030570 pectate lyase activity	5	0.0112067	0.4	0.179	Molecular Function	GO:0030570	pectate lyase activity	0.0112067	0.100072	0	0	5	28
GO:0001754 eye photoreceptor cell differentiation	3	0.0113583	0.223	0.3	Biological Process	GO:0001754	eye photoreceptor cell differentiation	0.0113583	0.152489	0	0	3	10
GO:0019877 diaminopimelate biosynthetic process	3	0.0113583	0.223	0.3	Biological Process	GO:0019877	diaminopimelate biosynthetic process	0.0113583	0.152489	0	0	3	10
GO:0034975 protein folding in endoplasmic reticulum	3	0.0113583	0.223	0.3	Biological Process	GO:0034975	protein folding in endoplasmic reticulum	0.0113583	0.152489	0	0	3	10
GO:0043446 cellular alkane metabolic process	3	0.0113583	0.223	0.3	Biological Process	GO:0043446	cellular alkane metabolic process	0.0113583	0.152489	0	0	3	10
GO:0043447 alkane biosynthetic process	3	0.0113583	0.223	0.3	Biological Process	GO:0043447	alkane biosynthetic process	0.0113583	0.152489	0	0	3	10
GO:0046530 photoreceptor cell differentiation	3	0.0113583	0.223	0.3	Biological Process	GO:0046530	photoreceptor cell differentiation	0.0113583	0.152489	0	0	3	10
GO:0048592 eye morphogenesis	3	0.0113583	0.223	0.3	Biological Process	GO:0048592	eye morphogenesis	0.0113583	0.152489	0	0	3	10
GO:0090116 C-5 methylation of cytosine	3	0.0113583	0.223	0.3	Biological Process	GO:0090116	C-5 methylation of cytosine	0.0113583	0.152489	0	0	3	10
GO:0016925 protein sumoylation	5	0.0114718	0.371	0.179	Biological Process	GO:0016925	protein sumoylation	0.0114718	0.152872	0	0	5	28
GO:0051272 positive regulation of cellular component movement	5	0.0114718	0.371	0.179	Biological Process	GO:0051272	positive regulation of cellular component movement	0.0114718	0.152872	0	0	5	28
GO:0000322 storage vacuole	7	0.0114899	0.539	0.137	Cellular Component	GO:0000322	storage vacuole	0.0114899	0.0979215	0	0	7	51
GO:0003730 mRNA 3'-UTR binding	10	0.0116148	0.799	0.114	Molecular Function	GO:0003730	mRNA 3'-UTR binding	0.0116148	0.102913	0	0	10	88
GO:0000287 magnesium ion binding	26	0.0118288	2.078	0.08	Molecular Function	GO:0000287	magnesium ion binding	0.0118288	0.104003	0	0	26	326
GO:0007584 response to nutrient	9	0.0120075	0.668	0.12	Biological Process	GO:0007584	response to nutrient	0.0120075	0.158834	0	0	9	75
GO:0009962 regulation of flavonoid biosynthetic process	9	0.0120075	0.668	0.12	Biological Process	GO:0009962	regulation of flavonoid biosynthetic process	0.0120075	0.158834	0	0	9	75
GO:0031226 intrinsic component of plasma membrane	48	0.012416	3.695	0.068	Cellular Component	GO:0031226	intrinsic component of plasma membrane	0.012416	0.104258	0	0	48	703
GO:0008144 drug binding	259	0.0126926	20.703	0.056	Molecular Function	GO:0008144	drug binding	0.0126926	0.110745	0	0	259	4612
GO:0044550 secondary metabolite biosynthetic process	34	0.0129608	2.524	0.075	Biological Process	GO:0044550	secondary metabolite biosynthetic process	0.0129608	0.169115	0	0	34	456
GO:0002793 positive regulation of peptide secretion	4	0.0130197	0.297	0.211	Biological Process	GO:0002793	positive regulation of peptide secretion	0.0130197	0.169115	0	0	4	19
GO:0050714 positive regulation of protein secretion	4	0.0130197	0.297	0.211	Biological Process	GO:0050714	positive regulation of protein secretion	0.0130197	0.169115	0	0	4	19
GO:0051973 positive regulation of telomerase activity	4	0.0130197	0.297	0.211	Biological Process	GO:0051973	positive regulation of telomerase activity	0.0130197	0.169115	0	0	4	19
GO:0072387 flavin adenine dinucleotide metabolic process	4	0.0130197	0.297	0.211	Biological Process	GO:0072387	flavin adenine dinucleotide metabolic process	0.0130197	0.169115	0	0	4	19
GO:0031670 cellular response to nutrient	5	0.013306	0.371	0.172	Biological Process	GO:0031670	cellular response to nutrient	0.013306	0.171595	0	0	5	29
GO:0097468 programmed cell death in response to reactive oxygen species	5	0.013306	0.371	0.172	Biological Process	GO:0097468	programmed cell death in response to reactive oxygen species	0.013306	0.171595	0	0	5	29
GO:0004335 galactokinase activity	2	0.0137472	0.16	0.5	Molecular Function	GO:0004335	galactokinase activity	0.0137472	0.115537	0	0	2	4
GO:0005078 MAP-kinase scaffold activity	2	0.0137472	0.16	0.5	Molecular Function	GO:0005078	MAP-kinase scaffold activity	0.0137472	0.115537	0	0	2	4
GO:0008967 phosphoglycolate phosphatase activity	2	0.0137472	0.16	0.5	Molecular Function	GO:0008967	phosphoglycolate phosphatase activity	0.0137472	0.115537	0	0	2	4
GO:0035591 signaling adaptor activity	2	0.0137472	0.16	0.5	Molecular Function	GO:0035591	signaling adaptor activity	0.0137472	0.115537	0	0	2	4
GO:0047461 (+)-delta-cadinene synthase activity	2	0.0137472	0.16	0.5	Molecular Function	GO:0047461	(+)-delta-cadinene synthase activity	0.0137472	0.115537	0	0	2	4
GO:0061014 positive regulation of mRNA catabolic process	8	0.0137933	0.594	0.125	Biological Process	GO:0061014	positive regulation of mRNA catabolic process	0.0137933	0.17246	0	0	8	64
GO:0001833 inner cell mass cell proliferation	2	0.0139004	0.148	0.5	Biological Process	GO:0001833	inner cell mass cell proliferation	0.0139004	0.17246	0	0	2	4
GO:0006990 positive regulation of transcription from RNA polymerase II promoter involved in unfolded protein response	2	0.0139004	0.148	0.5	Biological Process	GO:0006990	positive regulation of transcription from RNA polymerase II promoter involved in unfolded protein response	0.0139004	0.17246	0	0	2	4
GO:0030282 bone mineralization	2	0.0139004	0.148	0.5	Biological Process	GO:0030282	bone mineralization	0.0139004	0.17246	0	0	2	4
GO:0042256 mature ribosome assembly	2	0.0139004	0.148	0.5	Biological Process	GO:0042256	mature ribosome assembly	0.0139004	0.17246	0	0	2	4
GO:0060263 regulation of respiratory burst	2	0.0139004	0.148	0.5	Biological Process	GO:0060263	regulation of respiratory burst	0.0139004	0.17246	0	0	2	4
GO:0060267 positive regulation of respiratory burst	2	0.0139004	0.148	0.5	Biological Process	GO:0060267	positive regulation of respiratory burst	0.0139004	0.17246	0	0	2	4
GO:0071050 snoRNA polyadenylation	2	0.0139004	0.148	0.5	Biological Process	GO:0071050	snoRNA polyadenylation	0.0139004	0.17246	0	0	2	4
GO:1901522 positive regulation of transcription from RNA polymerase II promoter involved in cellular response to chemical stimulus	2	0.0139004	0.148	0.5	Biological Process	GO:1901522	positive regulation of transcription from RNA polymerase II promoter involved in cellular response to chemical stimulus	0.0139004	0.17246	0	0	2	4
GO:1901926 cadinene metabolic process	2	0.0139004	0.148	0.5	Biological Process	GO:1901926	cadinene metabolic process	0.0139004	0.17246	0	0	2	4
GO:1901928 cadinene biosynthetic process	2	0.0139004	0.148	0.5	Biological Process	GO:1901928	cadinene biosynthetic process	0.0139004	0.17246	0	0	2	4
GO:0043650 dicarboxylic acid biosynthetic process	7	0.0140997	0.52	0.135	Biological Process	GO:0043650	dicarboxylic acid biosynthetic process	0.0140997	0.174333	0	0	7	52
GO:0006323 DNA packaging	15	0.0147593	1.114	0.093	Biological Process	GO:0006323	DNA packaging	0.0147593	0.181863	0	0	15	161
GO:0003823 antigen binding	3	0.0148146	0.24	0.273	Molecular Function	GO:0003823	antigen binding	0.0148146	0.122704	0	0	3	11
GO:0030267 glyoxylate reductase (NADP) activity	3	0.0148146	0.24	0.273	Molecular Function	GO:0030267	glyoxylate reductase (NADP) activity	0.0148146	0.122704	0	0	3	11
GO:0005384 manganese ion transmembrane transporter activity	5	0.0149809	0.4	0.167	Molecular Function	GO:0005384	manganese ion transmembrane transporter activity	0.0149809	0.123188	0	0	5	30
GO:0001654 eye development	3	0.0150463	0.223	0.273	Biological Process	GO:0001654	eye development	0.0150463	0.182483	0	0	3	11
GO:0072595 maintenance of protein localization in organelle	3	0.0150463	0.223	0.273	Biological Process	GO:0072595	maintenance of protein localization in organelle	0.0150463	0.182483	0	0	3	11
GO:1990110 callus formation	3	0.0150463	0.223	0.273	Biological Process	GO:1990110	callus formation	0.0150463	0.182483	0	0	3	11
GO:0051046 regulation of secretion	8	0.0150632	0.594	0.123	Biological Process	GO:0051046	regulation of secretion	0.0150632	0.182483	0	0	8	65
GO:1903530 regulation of secretion by cell	8	0.0150632	0.594	0.123	Biological Process	GO:1903530	regulation of secretion by cell	0.0150632	0.182483	0	0	8	65
GO:0046283 anthocyanin-containing compound metabolic process	14	0.0151859	1.039	0.095	Biological Process	GO:0046283	anthocyanin-containing compound metabolic process	0.0151859	0.182616	0	0	14	147
GO:0070828 heterochromatin organization	6	0.0152248	0.445	0.146	Biological Process	GO:0070828	heterochromatin organization	0.0152248	0.182616	0	0	6	41
GO:0032411 positive regulation of transporter activity	5	0.015328	0.371	0.167	Biological Process	GO:0032411	positive regulation of transporter activity	0.015328	0.182616	0	0	5	30
GO:0032414 positive regulation of ion transmembrane transporter activity	5	0.015328	0.371	0.167	Biological Process	GO:0032414	positive regulation of ion transmembrane transporter activity	0.015328	0.182616	0	0	5	30
GO:0071421 manganese ion transmembrane transport	5	0.015328	0.371	0.167	Biological Process	GO:0071421	manganese ion transmembrane transport	0.015328	0.182616	0	0	5	30
GO:0000228 nuclear chromosome	30	0.0153468	2.309	0.074	Cellular Component	GO:0000228	nuclear chromosome	0.0153468	0.125613	0	0	30	404
GO:0042175 nuclear outer membrane-endoplasmic reticulum membrane network	77	0.0153992	5.928	0.063	Cellular Component	GO:0042175	nuclear outer membrane-endoplasmic reticulum membrane network	0.0153992	0.125613	0	0	77	1231
GO:0005524 ATP binding	242	0.0155617	19.345	0.056	Molecular Function	GO:0005524	ATP binding	0.0155617	0.12616	0	0	242	4306
GO:0004540 ribonuclease activity	18	0.015563	1.439	0.087	Molecular Function	GO:0004540	ribonuclease activity	0.015563	0.12616	0	0	18	208
GO:0010962 regulation of glucan biosynthetic process	4	0.0156456	0.297	0.2	Biological Process	GO:0010962	regulation of glucan biosynthetic process	0.0156456	0.185173	0	0	4	20
GO:2000653 regulation of genetic imprinting	4	0.0156456	0.297	0.2	Biological Process	GO:2000653	regulation of genetic imprinting	0.0156456	0.185173	0	0	4	20
GO:0051050 positive regulation of transport	14	0.0160302	1.039	0.095	Biological Process	GO:0051050	positive regulation of transport	0.0160302	0.189104	0	0	14	148
GO:0000229 cytoplasmic chromosome	5	0.0162102	0.385	0.161	Cellular Component	GO:0000229	cytoplasmic chromosome	0.0162102	0.130366	0	0	5	31
GO:0009738 abscisic acid-activated signaling pathway	42	0.0162923	3.118	0.07	Biological Process	GO:0009738	abscisic acid-activated signaling pathway	0.0162923	0.191567	0	0	42	598
GO:0046854 phosphatidylinositol phosphorylation	9	0.0165165	0.668	0.114	Biological Process	GO:0046854	phosphatidylinositol phosphorylation	0.0165165	0.193571	0	0	9	79
GO:0010087 phloem or xylem histogenesis	21	0.0169541	1.559	0.082	Biological Process	GO:0010087	phloem or xylem histogenesis	0.0169541	0.198055	0	0	21	255
GO:0005789 endoplasmic reticulum membrane	76	0.0171477	5.851	0.062	Cellular Component	GO:0005789	endoplasmic reticulum membrane	0.0171477	0.134987	0	0	76	1219
GO:0048522 positive regulation of cellular process	149	0.017346	11.062	0.059	Biological Process	GO:0048522	positive regulation of cellular process	0.017346	0.201978	0	0	149	2532
GO:0000779 condensed chromosome, centromeric region	8	0.0173873	0.616	0.118	Cellular Component	GO:0000779	condensed chromosome, centromeric region	0.0173873	0.134987	0	0	8	68
GO:0016592 mediator complex	10	0.0174939	0.77	0.105	Cellular Component	GO:0016592	mediator complex	0.0174939	0.134987	0	0	10	95
GO:0009645 response to low light intensity stimulus	5	0.0175452	0.371	0.161	Biological Process	GO:0009645	response to low light intensity stimulus	0.0175452	0.203638	0	0	5	31
GO:0046165 alcohol biosynthetic process	23	0.0179687	1.707	0.08	Biological Process	GO:0046165	alcohol biosynthetic process	0.0179687	0.207882	0	0	23	288
GO:0097306 cellular response to alcohol	56	0.0181543	4.157	0.066	Biological Process	GO:0097306	cellular response to alcohol	0.0181543	0.209356	0	0	56	844
GO:0043167 ion binding	591	0.0181768	47.242	0.053	Molecular Function	GO:0043167	ion binding	0.0181768	0.144693	0	0	591	11201
GO:0004124 cysteine synthase activity	4	0.018229	0.32	0.19	Molecular Function	GO:0004124	cysteine synthase activity	0.018229	0.144693	0	0	4	21
GO:0035035 histone acetyltransferase binding	4	0.018229	0.32	0.19	Molecular Function	GO:0035035	histone acetyltransferase binding	0.018229	0.144693	0	0	4	21
GO:0031983 vesicle lumen	3	0.0183209	0.231	0.25	Cellular Component	GO:0031983	vesicle lumen	0.0183209	0.13586	0	0	3	12
GO:0034774 secretory granule lumen	3	0.0183209	0.231	0.25	Cellular Component	GO:0034774	secretory granule lumen	0.0183209	0.13586	0	0	3	12
GO:0060205 cytoplasmic membrane-bounded vesicle lumen	3	0.0183209	0.231	0.25	Cellular Component	GO:0060205	cytoplasmic membrane-bounded vesicle lumen	0.0183209	0.13586	0	0	3	12
GO:0009250 glucan biosynthetic process	21	0.0183344	1.559	0.082	Biological Process	GO:0009250	glucan biosynthetic process	0.0183344	0.210758	0	0	21	257
GO:0019201 nucleotide kinase activity	6	0.0185064	0.48	0.14	Molecular Function	GO:0019201	nucleotide kinase activity	0.0185064	0.144883	0	0	6	43
GO:0050145 nucleoside phosphate kinase activity	6	0.0185064	0.48	0.14	Molecular Function	GO:0050145	nucleoside phosphate kinase activity	0.0185064	0.144883	0	0	6	43
GO:0051047 positive regulation of secretion	4	0.0185814	0.297	0.19	Biological Process	GO:0051047	positive regulation of secretion	0.0185814	0.21224	0	0	4	21
GO:1903532 positive regulation of secretion by cell	4	0.0185814	0.297	0.19	Biological Process	GO:1903532	positive regulation of secretion by cell	0.0185814	0.21224	0	0	4	21
GO:0030097 hemopoiesis	7	0.0188213	0.52	0.127	Biological Process	GO:0030097	hemopoiesis	0.0188213	0.2143	0	0	7	55
GO:0046940 nucleoside monophosphate phosphorylation	6	0.0189871	0.445	0.14	Biological Process	GO:0046940	nucleoside monophosphate phosphorylation	0.0189871	0.215212	0	0	6	43
GO:0009008 DNA-methyltransferase activity	3	0.0190363	0.24	0.25	Molecular Function	GO:0009008	DNA-methyltransferase activity	0.0190363	0.147017	0	0	3	12
GO:0030235 nitric-oxide synthase regulator activity	3	0.0190363	0.24	0.25	Molecular Function	GO:0030235	nitric-oxide synthase regulator activity	0.0190363	0.147017	0	0	3	12
GO:0046488 phosphatidylinositol metabolic process	16	0.0190373	1.188	0.088	Biological Process	GO:0046488	phosphatidylinositol metabolic process	0.0190373	0.215212	0	0	16	181
GO:0044699 single-organism process	980	0.0192161	72.754	0.052	Biological Process	GO:0044699	single-organism process	0.0192161	0.215212	0	0	980	18994
GO:0009295 nucleoid	12	0.0192929	0.924	0.096	Cellular Component	GO:0009295	nucleoid	0.0192929	0.141234	0	0	12	125
GO:0035773 insulin secretion involved in cellular response to glucose stimulus	3	0.0193297	0.223	0.25	Biological Process	GO:0035773	insulin secretion involved in cellular response to glucose stimulus	0.0193297	0.215212	0	0	3	12
GO:0035774 positive regulation of insulin secretion involved in cellular response to glucose stimulus	3	0.0193297	0.223	0.25	Biological Process	GO:0035774	positive regulation of insulin secretion involved in cellular response to glucose stimulus	0.0193297	0.215212	0	0	3	12
GO:0042771 intrinsic apoptotic signaling pathway in response to DNA damage by p53 class mediator	3	0.0193297	0.223	0.25	Biological Process	GO:0042771	intrinsic apoptotic signaling pathway in response to DNA damage by p53 class mediator	0.0193297	0.215212	0	0	3	12
GO:0061178 regulation of insulin secretion involved in cellular response to glucose stimulus	3	0.0193297	0.223	0.25	Biological Process	GO:0061178	regulation of insulin secretion involved in cellular response to glucose stimulus	0.0193297	0.215212	0	0	3	12
GO:0009696 salicylic acid metabolic process	8	0.0193798	0.594	0.118	Biological Process	GO:0009696	salicylic acid metabolic process	0.0193798	0.215212	0	0	8	68
GO:0005527 macrolide binding	5	0.0195216	0.4	0.156	Molecular Function	GO:0005527	macrolide binding	0.0195216	0.148755	0	0	5	32
GO:0005528 FK506 binding	5	0.0195216	0.4	0.156	Molecular Function	GO:0005528	FK506 binding	0.0195216	0.148755	0	0	5	32
GO:0006950 response to stress	355	0.0196557	26.355	0.055	Biological Process	GO:0006950	response to stress	0.0196557	0.217604	0	0	355	6482
GO:0031497 chromatin assembly	12	0.0197948	0.891	0.098	Biological Process	GO:0031497	chromatin assembly	0.0197948	0.218472	0	0	12	123
GO:0009814 defense response, incompatible interaction	31	0.01993	2.301	0.074	Biological Process	GO:0009814	defense response, incompatible interaction	0.01993	0.219291	0	0	31	421
GO:0005267 potassium channel activity	7	0.0200395	0.56	0.125	Molecular Function	GO:0005267	potassium channel activity	0.0200395	0.151689	0	0	7	56
GO:0033218 amide binding	18	0.0201843	1.439	0.084	Molecular Function	GO:0033218	amide binding	0.0201843	0.15178	0	0	18	214
GO:0032592 integral component of mitochondrial membrane	8	0.0204059	0.616	0.114	Cellular Component	GO:0032592	integral component of mitochondrial membrane	0.0204059	0.145784	0	0	8	70
GO:0000777 condensed chromosome kinetochore	7	0.0204251	0.539	0.123	Cellular Component	GO:0000777	condensed chromosome kinetochore	0.0204251	0.145784	0	0	7	57
GO:0009737 response to abscisic acid	74	0.0204583	5.494	0.063	Biological Process	GO:0009737	response to abscisic acid	0.0204583	0.224418	0	0	74	1169
GO:0010027 thylakoid membrane organization	8	0.0209966	0.594	0.116	Biological Process	GO:0010027	thylakoid membrane organization	0.0209966	0.229622	0	0	8	69
GO:0031968 organelle outer membrane	18	0.0210049	1.386	0.083	Cellular Component	GO:0031968	organelle outer membrane	0.0210049	0.148072	0	0	18	218
GO:0009882 blue light photoreceptor activity	4	0.021427	0.32	0.182	Molecular Function	GO:0009882	blue light photoreceptor activity	0.021427	0.159033	0	0	4	22
GO:0070034 telomerase RNA binding	4	0.021427	0.32	0.182	Molecular Function	GO:0070034	telomerase RNA binding	0.021427	0.159033	0	0	4	22
GO:0009698 phenylpropanoid metabolic process	23	0.0215007	1.707	0.078	Biological Process	GO:0009698	phenylpropanoid metabolic process	0.0215007	0.234423	0	0	23	293
GO:0098827 endoplasmic reticulum subcompartment	76	0.0217052	5.851	0.062	Cellular Component	GO:0098827	endoplasmic reticulum subcompartment	0.0217052	0.151142	0	0	76	1233
GO:0006722 triterpenoid metabolic process	4	0.0218363	0.297	0.182	Biological Process	GO:0006722	triterpenoid metabolic process	0.0218363	0.235032	0	0	4	22
GO:0047890 flavanone 4-reductase activity	5	0.022096	0.4	0.152	Molecular Function	GO:0047890	flavanone 4-reductase activity	0.022096	0.160333	0	0	5	33
GO:0030785 [ribulose-bisphosphate carboxylase]-lysine N-methyltransferase activity	2	0.0221633	0.16	0.4	Molecular Function	GO:0030785	[ribulose-bisphosphate carboxylase]-lysine N-methyltransferase activity	0.0221633	0.160333	0	0	2	5
GO:0033328 peroxisome membrane targeting sequence binding	2	0.0221633	0.16	0.4	Molecular Function	GO:0033328	peroxisome membrane targeting sequence binding	0.0221633	0.160333	0	0	2	5
GO:0050265 RNA uridylyltransferase activity	2	0.0221633	0.16	0.4	Molecular Function	GO:0050265	RNA uridylyltransferase activity	0.0221633	0.160333	0	0	2	5
GO:0042445 hormone metabolic process	44	0.0221958	3.267	0.068	Biological Process	GO:0042445	hormone metabolic process	0.0221958	0.235032	0	0	44	645
GO:0006044 N-acetylglucosamine metabolic process	2	0.0224058	0.148	0.4	Biological Process	GO:0006044	N-acetylglucosamine metabolic process	0.0224058	0.235032	0	0	2	5
GO:0006407 rRNA export from nucleus	2	0.0224058	0.148	0.4	Biological Process	GO:0006407	rRNA export from nucleus	0.0224058	0.235032	0	0	2	5
GO:0010273 detoxification of copper ion	2	0.0224058	0.148	0.4	Biological Process	GO:0010273	detoxification of copper ion	0.0224058	0.235032	0	0	2	5
GO:0036003 positive regulation of transcription from RNA polymerase II promoter in response to stress	2	0.0224058	0.148	0.4	Biological Process	GO:0036003	positive regulation of transcription from RNA polymerase II promoter in response to stress	0.0224058	0.235032	0	0	2	5
GO:0051029 rRNA transport	2	0.0224058	0.148	0.4	Biological Process	GO:0051029	rRNA transport	0.0224058	0.235032	0	0	2	5
GO:0060148 positive regulation of posttranscriptional gene silencing	2	0.0224058	0.148	0.4	Biological Process	GO:0060148	positive regulation of posttranscriptional gene silencing	0.0224058	0.235032	0	0	2	5
GO:0071076 RNA 3' uridylation	2	0.0224058	0.148	0.4	Biological Process	GO:0071076	RNA 3' uridylation	0.0224058	0.235032	0	0	2	5
GO:0071586 CAAX-box protein processing	2	0.0224058	0.148	0.4	Biological Process	GO:0071586	CAAX-box protein processing	0.0224058	0.235032	0	0	2	5
GO:0080120 CAAX-box protein maturation	2	0.0224058	0.148	0.4	Biological Process	GO:0080120	CAAX-box protein maturation	0.0224058	0.235032	0	0	2	5
GO:0090227 regulation of red or far-red light signaling pathway	2	0.0224058	0.148	0.4	Biological Process	GO:0090227	regulation of red or far-red light signaling pathway	0.0224058	0.235032	0	0	2	5
GO:1990169 stress response to copper ion	2	0.0224058	0.148	0.4	Biological Process	GO:1990169	stress response to copper ion	0.0224058	0.235032	0	0	2	5
GO:0010970 establishment of localization by movement along microtubule	5	0.022592	0.371	0.152	Biological Process	GO:0010970	establishment of localization by movement along microtubule	0.022592	0.235612	0	0	5	33
GO:0051480 regulation of cytosolic calcium ion concentration	5	0.022592	0.371	0.152	Biological Process	GO:0051480	regulation of cytosolic calcium ion concentration	0.022592	0.235612	0	0	5	33
GO:0030008 TRAPP complex	3	0.0229675	0.231	0.231	Cellular Component	GO:0030008	TRAPP complex	0.0229675	0.158005	0	0	3	13
GO:0019725 cellular homeostasis	44	0.0232386	3.267	0.068	Biological Process	GO:0019725	cellular homeostasis	0.0232386	0.241654	0	0	44	647
GO:0046872 metal ion binding	363	0.0234243	29.017	0.054	Molecular Function	GO:0046872	metal ion binding	0.0234243	0.16839	0	0	363	6706
GO:0008180 COP9 signalosome	5	0.0235542	0.385	0.147	Cellular Component	GO:0008180	COP9 signalosome	0.0235542	0.158535	0	0	5	34
GO:0030141 secretory granule	6	0.0235998	0.462	0.13	Cellular Component	GO:0030141	secretory granule	0.0235998	0.158535	0	0	6	46
GO:0046834 lipid phosphorylation	9	0.0237552	0.668	0.107	Biological Process	GO:0046834	lipid phosphorylation	0.0237552	0.246315	0	0	9	84
GO:0080116 glucuronoxylan glucuronosyltransferase activity	3	0.0238519	0.24	0.231	Molecular Function	GO:0080116	glucuronoxylan glucuronosyltransferase activity	0.0238519	0.170392	0	0	3	13
GO:0009237 siderophore metabolic process	3	0.0242144	0.223	0.231	Biological Process	GO:0009237	siderophore metabolic process	0.0242144	0.24751	0	0	3	13
GO:0009252 peptidoglycan biosynthetic process	3	0.0242144	0.223	0.231	Biological Process	GO:0009252	peptidoglycan biosynthetic process	0.0242144	0.24751	0	0	3	13
GO:0019290 siderophore biosynthetic process	3	0.0242144	0.223	0.231	Biological Process	GO:0019290	siderophore biosynthetic process	0.0242144	0.24751	0	0	3	13
GO:0072332 intrinsic apoptotic signaling pathway by p53 class mediator	3	0.0242144	0.223	0.231	Biological Process	GO:0072332	intrinsic apoptotic signaling pathway by p53 class mediator	0.0242144	0.24751	0	0	3	13
GO:0090596 sensory organ morphogenesis	3	0.0242144	0.223	0.231	Biological Process	GO:0090596	sensory organ morphogenesis	0.0242144	0.24751	0	0	3	13
GO:0035251 UDP-glucosyltransferase activity	20	0.0242262	1.599	0.08	Molecular Function	GO:0035251	UDP-glucosyltransferase activity	0.0242262	0.171991	0	0	20	250
GO:0009691 cytokinin biosynthetic process	7	0.0245519	0.52	0.121	Biological Process	GO:0009691	cytokinin biosynthetic process	0.0245519	0.249542	0	0	7	58
GO:0097190 apoptotic signaling pathway	7	0.0245519	0.52	0.121	Biological Process	GO:0097190	apoptotic signaling pathway	0.0245519	0.249542	0	0	7	58
GO:0016679 oxidoreductase activity, acting on diphenols and related substances as donors	9	0.0246173	0.719	0.106	Molecular Function	GO:0016679	oxidoreductase activity, acting on diphenols and related substances as donors	0.0246173	0.173689	0	0	9	85
GO:0099512 supramolecular fiber	35	0.0248565	2.694	0.069	Cellular Component	GO:0099512	supramolecular fiber	0.0248565	0.165035	0	0	35	506
GO:0004715 non-membrane spanning protein tyrosine kinase activity	4	0.0249471	0.32	0.174	Molecular Function	GO:0004715	non-membrane spanning protein tyrosine kinase activity	0.0249471	0.173869	0	0	4	23
GO:1990825 sequence-specific mRNA binding	4	0.0249471	0.32	0.174	Molecular Function	GO:1990825	sequence-specific mRNA binding	0.0249471	0.173869	0	0	4	23
GO:0042537 benzene-containing compound metabolic process	11	0.0253596	0.817	0.097	Biological Process	GO:0042537	benzene-containing compound metabolic process	0.0253596	0.255652	0	0	11	113
GO:0010810 regulation of cell-substrate adhesion	4	0.0254178	0.297	0.174	Biological Process	GO:0010810	regulation of cell-substrate adhesion	0.0254178	0.255652	0	0	4	23
GO:1902347 response to strigolactone	4	0.0254178	0.297	0.174	Biological Process	GO:1902347	response to strigolactone	0.0254178	0.255652	0	0	4	23
GO:0002520 immune system development	9	0.0254373	0.668	0.106	Biological Process	GO:0002520	immune system development	0.0254373	0.255652	0	0	9	85
GO:0098573 intrinsic component of mitochondrial membrane	8	0.0256042	0.616	0.11	Cellular Component	GO:0098573	intrinsic component of mitochondrial membrane	0.0256042	0.168046	0	0	8	73
GO:0030705 cytoskeleton-dependent intracellular transport	6	0.0257448	0.445	0.13	Biological Process	GO:0030705	cytoskeleton-dependent intracellular transport	0.0257448	0.258022	0	0	6	46
GO:0043596 nuclear replication fork	6	0.0259731	0.462	0.128	Cellular Component	GO:0043596	nuclear replication fork	0.0259731	0.16853	0	0	6	47
GO:0009668 plastid membrane organization	8	0.026416	0.594	0.111	Biological Process	GO:0009668	plastid membrane organization	0.026416	0.262555	0	0	8	72
GO:0030435 sporulation resulting in formation of a cellular spore	8	0.026416	0.594	0.111	Biological Process	GO:0030435	sporulation resulting in formation of a cellular spore	0.026416	0.262555	0	0	8	72
GO:0071483 cellular response to blue light	8	0.026416	0.594	0.111	Biological Process	GO:0071483	cellular response to blue light	0.026416	0.262555	0	0	8	72
GO:0009743 response to carbohydrate	28	0.026489	2.079	0.073	Biological Process	GO:0009743	response to carbohydrate	0.026489	0.262555	0	0	28	381
GO:0032787 monocarboxylic acid metabolic process	67	0.0266767	4.974	0.063	Biological Process	GO:0032787	monocarboxylic acid metabolic process	0.0266767	0.26321	0	0	67	1059
GO:2000069 regulation of post-embryonic root development	7	0.0267014	0.52	0.119	Biological Process	GO:2000069	regulation of post-embryonic root development	0.0267014	0.26321	0	0	7	59
GO:0003756 protein disulfide isomerase activity	6	0.0276208	0.48	0.128	Molecular Function	GO:0003756	protein disulfide isomerase activity	0.0276208	0.189692	0	0	6	47
GO:0016864 intramolecular oxidoreductase activity, transposing S-S bonds	6	0.0276208	0.48	0.128	Molecular Function	GO:0016864	intramolecular oxidoreductase activity, transposing S-S bonds	0.0276208	0.189692	0	0	6	47
GO:0019867 outer membrane	18	0.0277378	1.386	0.08	Cellular Component	GO:0019867	outer membrane	0.0277378	0.175405	0	0	18	225
GO:0016289 CoA hydrolase activity	5	0.0278812	0.4	0.143	Molecular Function	GO:0016289	CoA hydrolase activity	0.0278812	0.189692	0	0	5	35
GO:0045552 dihydrokaempferol 4-reductase activity	5	0.0278812	0.4	0.143	Molecular Function	GO:0045552	dihydrokaempferol 4-reductase activity	0.0278812	0.189692	0	0	5	35
GO:0043005 neuron projection	12	0.0281519	0.924	0.091	Cellular Component	GO:0043005	neuron projection	0.0281519	0.175405	0	0	12	132
GO:0035619 root hair tip	3	0.0281914	0.231	0.214	Cellular Component	GO:0035619	root hair tip	0.0281914	0.175405	0	0	3	14
GO:0000785 chromatin	30	0.0282614	2.309	0.071	Cellular Component	GO:0000785	chromatin	0.0282614	0.175405	0	0	30	425
GO:0043065 positive regulation of apoptotic process	6	0.0283111	0.445	0.128	Biological Process	GO:0043065	positive regulation of apoptotic process	0.0283111	0.272606	0	0	6	47
GO:0032876 negative regulation of DNA endoreduplication	5	0.0284938	0.371	0.143	Biological Process	GO:0032876	negative regulation of DNA endoreduplication	0.0284938	0.272606	0	0	5	35
GO:0046914 transition metal ion binding	129	0.0287917	10.312	0.058	Molecular Function	GO:0046914	transition metal ion binding	0.0287917	0.194727	0	0	129	2215
GO:0006986 response to unfolded protein	7	0.0289755	0.52	0.117	Biological Process	GO:0006986	response to unfolded protein	0.0289755	0.272606	0	0	7	60
GO:0009785 blue light signaling pathway	7	0.0289755	0.52	0.117	Biological Process	GO:0009785	blue light signaling pathway	0.0289755	0.272606	0	0	7	60
GO:0048870 cell motility	12	0.0290289	0.891	0.092	Biological Process	GO:0048870	cell motility	0.0290289	0.272606	0	0	12	130
GO:0051674 localization of cell	12	0.0290289	0.891	0.092	Biological Process	GO:0051674	localization of cell	0.0290289	0.272606	0	0	12	130
GO:0016758 transferase activity, transferring hexosyl groups	42	0.0290368	3.357	0.067	Molecular Function	GO:0016758	transferase activity, transferring hexosyl groups	0.0290368	0.19523	0	0	42	626
GO:0009626 plant-type hypersensitive response	18	0.0293305	1.336	0.081	Biological Process	GO:0009626	plant-type hypersensitive response	0.0293305	0.272606	0	0	18	222
GO:0034050 host programmed cell death induced by symbiont	18	0.0293305	1.336	0.081	Biological Process	GO:0034050	host programmed cell death induced by symbiont	0.0293305	0.272606	0	0	18	222
GO:0007423 sensory organ development	4	0.029332	0.297	0.167	Biological Process	GO:0007423	sensory organ development	0.029332	0.272606	0	0	4	24
GO:0031589 cell-substrate adhesion	4	0.029332	0.297	0.167	Biological Process	GO:0031589	cell-substrate adhesion	0.029332	0.272606	0	0	4	24
GO:0034508 centromere complex assembly	4	0.029332	0.297	0.167	Biological Process	GO:0034508	centromere complex assembly	0.029332	0.272606	0	0	4	24
GO:0016053 organic acid biosynthetic process	76	0.0294263	5.642	0.062	Biological Process	GO:0016053	organic acid biosynthetic process	0.0294263	0.272606	0	0	76	1227
GO:0046394 carboxylic acid biosynthetic process	76	0.0294263	5.642	0.062	Biological Process	GO:0046394	carboxylic acid biosynthetic process	0.0294263	0.272606	0	0	76	1227
GO:0072330 monocarboxylic acid biosynthetic process	45	0.0294271	3.341	0.067	Biological Process	GO:0072330	monocarboxylic acid biosynthetic process	0.0294271	0.272606	0	0	45	675
GO:0016787 hydrolase activity	308	0.0294745	24.62	0.054	Molecular Function	GO:0016787	hydrolase activity	0.0294745	0.197014	0	0	308	5658
GO:0015030 Cajal body	5	0.0294757	0.385	0.139	Cellular Component	GO:0015030	Cajal body	0.0294757	0.179049	0	0	5	36
GO:0044450 microtubule organizing center part	5	0.0294757	0.385	0.139	Cellular Component	GO:0044450	microtubule organizing center part	0.0294757	0.179049	0	0	5	36
GO:0010605 negative regulation of macromolecule metabolic process	100	0.0296847	7.424	0.06	Biological Process	GO:0010605	negative regulation of macromolecule metabolic process	0.0296847	0.272606	0	0	100	1666
GO:0046915 transition metal ion transmembrane transporter activity	10	0.0297001	0.799	0.098	Molecular Function	GO:0046915	transition metal ion transmembrane transporter activity	0.0297001	0.197368	0	0	10	102
GO:0001503 ossification	3	0.0297002	0.223	0.214	Biological Process	GO:0001503	ossification	0.0297002	0.272606	0	0	3	14
GO:0010595 positive regulation of endothelial cell migration	3	0.0297002	0.223	0.214	Biological Process	GO:0010595	positive regulation of endothelial cell migration	0.0297002	0.272606	0	0	3	14
GO:0031532 actin cytoskeleton reorganization	3	0.0297002	0.223	0.214	Biological Process	GO:0031532	actin cytoskeleton reorganization	0.0297002	0.272606	0	0	3	14
GO:0070202 regulation of establishment of protein localization to chromosome	3	0.0297002	0.223	0.214	Biological Process	GO:0070202	regulation of establishment of protein localization to chromosome	0.0297002	0.272606	0	0	3	14
GO:0070203 regulation of establishment of protein localization to telomere	3	0.0297002	0.223	0.214	Biological Process	GO:0070203	regulation of establishment of protein localization to telomere	0.0297002	0.272606	0	0	3	14
GO:0071391 cellular response to estrogen stimulus	3	0.0297002	0.223	0.214	Biological Process	GO:0071391	cellular response to estrogen stimulus	0.0297002	0.272606	0	0	3	14
GO:1904814 regulation of protein localization to chromosome, telomeric region	3	0.0297002	0.223	0.214	Biological Process	GO:1904814	regulation of protein localization to chromosome, telomeric region	0.0297002	0.272606	0	0	3	14
GO:1904816 positive regulation of protein localization to chromosome, telomeric region	3	0.0297002	0.223	0.214	Biological Process	GO:1904816	positive regulation of protein localization to chromosome, telomeric region	0.0297002	0.272606	0	0	3	14
GO:1904851 positive regulation of establishment of protein localization to telomere	3	0.0297002	0.223	0.214	Biological Process	GO:1904851	positive regulation of establishment of protein localization to telomere	0.0297002	0.272606	0	0	3	14
GO:2000249 regulation of actin cytoskeleton reorganization	3	0.0297002	0.223	0.214	Biological Process	GO:2000249	regulation of actin cytoskeleton reorganization	0.0297002	0.272606	0	0	3	14
GO:2000251 positive regulation of actin cytoskeleton reorganization	3	0.0297002	0.223	0.214	Biological Process	GO:2000251	positive regulation of actin cytoskeleton reorganization	0.0297002	0.272606	0	0	3	14
GO:2000282 regulation of cellular amino acid biosynthetic process	3	0.0297002	0.223	0.214	Biological Process	GO:2000282	regulation of cellular amino acid biosynthetic process	0.0297002	0.272606	0	0	3	14
GO:0033993 response to lipid	103	0.0299742	7.647	0.06	Biological Process	GO:0033993	response to lipid	0.0299742	0.27442	0	0	103	1722
GO:0042737 drug catabolic process	25	0.0303799	1.856	0.074	Biological Process	GO:0042737	drug catabolic process	0.0303799	0.277428	0	0	25	336
GO:0045490 pectin catabolic process	10	0.0307368	0.742	0.098	Biological Process	GO:0045490	pectin catabolic process	0.0307368	0.279271	0	0	10	102
GO:0047484 regulation of response to osmotic stress	10	0.0307368	0.742	0.098	Biological Process	GO:0047484	regulation of response to osmotic stress	0.0307368	0.279271	0	0	10	102
GO:0023061 signal release	6	0.0310402	0.445	0.125	Biological Process	GO:0023061	signal release	0.0310402	0.280496	0	0	6	48
GO:0006814 sodium ion transport	7	0.0313768	0.52	0.115	Biological Process	GO:0006814	sodium ion transport	0.0313768	0.280496	0	0	7	61
GO:0005628 prospore membrane	4	0.0315044	0.308	0.16	Cellular Component	GO:0005628	prospore membrane	0.0315044	0.185454	0	0	4	25
GO:0042763 intracellular immature spore	4	0.0315044	0.308	0.16	Cellular Component	GO:0042763	intracellular immature spore	0.0315044	0.185454	0	0	4	25
GO:0042764 ascospore-type prospore	4	0.0315044	0.308	0.16	Cellular Component	GO:0042764	ascospore-type prospore	0.0315044	0.185454	0	0	4	25
GO:0003729 mRNA binding	44	0.0317034	3.517	0.066	Molecular Function	GO:0003729	mRNA binding	0.0317034	0.207525	0	0	44	665
GO:0044822 poly(A) RNA binding	44	0.0317034	3.517	0.066	Molecular Function	GO:0044822	poly(A) RNA binding	0.0317034	0.207525	0	0	44	665
GO:0016616 oxidoreductase activity, acting on the CH-OH group of donors, NAD or NADP as acceptor	22	0.0317733	1.759	0.076	Molecular Function	GO:0016616	oxidoreductase activity, acting on the CH-OH group of donors, NAD or NADP as acceptor	0.0317733	0.207525	0	0	22	290
GO:0032781 positive regulation of ATPase activity	5	0.0317773	0.371	0.139	Biological Process	GO:0032781	positive regulation of ATPase activity	0.0317773	0.280496	0	0	5	36
GO:0043462 regulation of ATPase activity	5	0.0317773	0.371	0.139	Biological Process	GO:0043462	regulation of ATPase activity	0.0317773	0.280496	0	0	5	36
GO:0048439 flower morphogenesis	5	0.0317773	0.371	0.139	Biological Process	GO:0048439	flower morphogenesis	0.0317773	0.280496	0	0	5	36
GO:0000774 adenyl-nucleotide exchange factor activity	2	0.0321633	0.16	0.333	Molecular Function	GO:0000774	adenyl-nucleotide exchange factor activity	0.0321633	0.207698	0	0	2	6
GO:0004096 catalase activity	2	0.0321633	0.16	0.333	Molecular Function	GO:0004096	catalase activity	0.0321633	0.207698	0	0	2	6
GO:0048574 long-day photoperiodism, flowering	13	0.0322133	0.965	0.088	Biological Process	GO:0048574	long-day photoperiodism, flowering	0.0322133	0.280496	0	0	13	147
GO:0000461 endonucleolytic cleavage to generate mature 3'-end of SSU-rRNA from (SSU-rRNA, 5.8S rRNA, LSU-rRNA)	2	0.0325089	0.148	0.333	Biological Process	GO:0000461	endonucleolytic cleavage to generate mature 3'-end of SSU-rRNA from (SSU-rRNA, 5.8S rRNA, LSU-rRNA)	0.0325089	0.280496	0	0	2	6
GO:0006047 UDP-N-acetylglucosamine metabolic process	2	0.0325089	0.148	0.333	Biological Process	GO:0006047	UDP-N-acetylglucosamine metabolic process	0.0325089	0.280496	0	0	2	6
GO:0006048 UDP-N-acetylglucosamine biosynthetic process	2	0.0325089	0.148	0.333	Biological Process	GO:0006048	UDP-N-acetylglucosamine biosynthetic process	0.0325089	0.280496	0	0	2	6
GO:0009947 centrolateral axis specification	2	0.0325089	0.148	0.333	Biological Process	GO:0009947	centrolateral axis specification	0.0325089	0.280496	0	0	2	6
GO:0010865 stipule development	2	0.0325089	0.148	0.333	Biological Process	GO:0010865	stipule development	0.0325089	0.280496	0	0	2	6
GO:0018973 trinitrotoluene metabolic process	2	0.0325089	0.148	0.333	Biological Process	GO:0018973	trinitrotoluene metabolic process	0.0325089	0.280496	0	0	2	6
GO:0018974 2,4,6-trinitrotoluene metabolic process	2	0.0325089	0.148	0.333	Biological Process	GO:0018974	2,4,6-trinitrotoluene metabolic process	0.0325089	0.280496	0	0	2	6
GO:0019326 nitrotoluene metabolic process	2	0.0325089	0.148	0.333	Biological Process	GO:0019326	nitrotoluene metabolic process	0.0325089	0.280496	0	0	2	6
GO:0046256 2,4,6-trinitrotoluene catabolic process	2	0.0325089	0.148	0.333	Biological Process	GO:0046256	2,4,6-trinitrotoluene catabolic process	0.0325089	0.280496	0	0	2	6
GO:0046260 trinitrotoluene catabolic process	2	0.0325089	0.148	0.333	Biological Process	GO:0046260	trinitrotoluene catabolic process	0.0325089	0.280496	0	0	2	6
GO:0046263 nitrotoluene catabolic process	2	0.0325089	0.148	0.333	Biological Process	GO:0046263	nitrotoluene catabolic process	0.0325089	0.280496	0	0	2	6
GO:0072490 toluene-containing compound metabolic process	2	0.0325089	0.148	0.333	Biological Process	GO:0072490	toluene-containing compound metabolic process	0.0325089	0.280496	0	0	2	6
GO:0072491 toluene-containing compound catabolic process	2	0.0325089	0.148	0.333	Biological Process	GO:0072491	toluene-containing compound catabolic process	0.0325089	0.280496	0	0	2	6
GO:0097353 centrolateral pattern formation	2	0.0325089	0.148	0.333	Biological Process	GO:0097353	centrolateral pattern formation	0.0325089	0.280496	0	0	2	6
GO:1902066 regulation of cell wall pectin metabolic process	2	0.0325089	0.148	0.333	Biological Process	GO:1902066	regulation of cell wall pectin metabolic process	0.0325089	0.280496	0	0	2	6
GO:0098793 presynapse	5	0.0327576	0.385	0.135	Cellular Component	GO:0098793	presynapse	0.0327576	0.190863	0	0	5	37
GO:0034605 cellular response to heat	9	0.0330097	0.668	0.101	Biological Process	GO:0034605	cellular response to heat	0.0330097	0.284136	0	0	9	89
GO:0051193 regulation of cofactor metabolic process	11	0.0334638	0.817	0.093	Biological Process	GO:0051193	regulation of cofactor metabolic process	0.0334638	0.287011	0	0	11	118
GO:0031321 ascospore-type prospore assembly	4	0.033583	0.297	0.16	Biological Process	GO:0031321	ascospore-type prospore assembly	0.033583	0.287011	0	0	4	25
GO:0043281 regulation of cysteine-type endopeptidase activity involved in apoptotic process	4	0.033583	0.297	0.16	Biological Process	GO:0043281	regulation of cysteine-type endopeptidase activity involved in apoptotic process	0.033583	0.287011	0	0	4	25
GO:0030424 axon	8	0.0338793	0.616	0.104	Cellular Component	GO:0030424	axon	0.0338793	0.195405	0	0	8	77
GO:0009635 response to herbicide	7	0.0339078	0.52	0.113	Biological Process	GO:0009635	response to herbicide	0.0339078	0.288086	0	0	7	62
GO:0010187 negative regulation of seed germination	6	0.0339354	0.445	0.122	Biological Process	GO:0010187	negative regulation of seed germination	0.0339354	0.288086	0	0	6	49
GO:0030163 protein catabolic process	75	0.033949	5.568	0.062	Biological Process	GO:0030163	protein catabolic process	0.033949	0.288086	0	0	75	1218
GO:0000209 protein polyubiquitination	18	0.0341324	1.336	0.08	Biological Process	GO:0000209	protein polyubiquitination	0.0341324	0.288961	0	0	18	226
GO:0031399 regulation of protein modification process	41	0.0347157	3.044	0.067	Biological Process	GO:0031399	regulation of protein modification process	0.0347157	0.289965	0	0	41	613
GO:0044710 single-organism metabolic process	466	0.035012	34.595	0.053	Biological Process	GO:0044710	single-organism metabolic process	0.035012	0.289965	0	0	466	8737
GO:0046658 anchored component of plasma membrane	23	0.0351387	1.771	0.073	Cellular Component	GO:0046658	anchored component of plasma membrane	0.0351387	0.200642	0	0	23	314
GO:0016310 phosphorylation	156	0.0351631	11.581	0.057	Biological Process	GO:0016310	phosphorylation	0.0351631	0.289965	0	0	156	2726
GO:0001078 transcriptional repressor activity, RNA polymerase II core promoter proximal region sequence-specific binding	3	0.0352615	0.24	0.2	Molecular Function	GO:0001078	transcriptional repressor activity, RNA polymerase II core promoter proximal region sequence-specific binding	0.0352615	0.22145	0	0	3	15
GO:0003913 DNA photolyase activity	3	0.0352615	0.24	0.2	Molecular Function	GO:0003913	DNA photolyase activity	0.0352615	0.22145	0	0	3	15
GO:0004000 adenosine deaminase activity	3	0.0352615	0.24	0.2	Molecular Function	GO:0004000	adenosine deaminase activity	0.0352615	0.22145	0	0	3	15
GO:0043139 5'-3' DNA helicase activity	3	0.0352615	0.24	0.2	Molecular Function	GO:0043139	5'-3' DNA helicase activity	0.0352615	0.22145	0	0	3	15
GO:0043141 ATP-dependent 5'-3' DNA helicase activity	3	0.0352615	0.24	0.2	Molecular Function	GO:0043141	ATP-dependent 5'-3' DNA helicase activity	0.0352615	0.22145	0	0	3	15
GO:0034620 cellular response to unfolded protein	5	0.0352878	0.371	0.135	Biological Process	GO:0034620	cellular response to unfolded protein	0.0352878	0.289965	0	0	5	37
GO:0034767 positive regulation of ion transmembrane transport	5	0.0352878	0.371	0.135	Biological Process	GO:0034767	positive regulation of ion transmembrane transport	0.0352878	0.289965	0	0	5	37
GO:0072659 protein localization to plasma membrane	5	0.0352878	0.371	0.135	Biological Process	GO:0072659	protein localization to plasma membrane	0.0352878	0.289965	0	0	5	37
GO:0006333 chromatin assembly or disassembly	12	0.035527	0.891	0.09	Biological Process	GO:0006333	chromatin assembly or disassembly	0.035527	0.289965	0	0	12	134
GO:0001953 negative regulation of cell-matrix adhesion	3	0.0357822	0.223	0.2	Biological Process	GO:0001953	negative regulation of cell-matrix adhesion	0.0357822	0.289965	0	0	3	15
GO:0009273 peptidoglycan-based cell wall biogenesis	3	0.0357822	0.223	0.2	Biological Process	GO:0009273	peptidoglycan-based cell wall biogenesis	0.0357822	0.289965	0	0	3	15
GO:0010812 negative regulation of cell-substrate adhesion	3	0.0357822	0.223	0.2	Biological Process	GO:0010812	negative regulation of cell-substrate adhesion	0.0357822	0.289965	0	0	3	15
GO:0032024 positive regulation of insulin secretion	3	0.0357822	0.223	0.2	Biological Process	GO:0032024	positive regulation of insulin secretion	0.0357822	0.289965	0	0	3	15
GO:0032776 DNA methylation on cytosine	3	0.0357822	0.223	0.2	Biological Process	GO:0032776	DNA methylation on cytosine	0.0357822	0.289965	0	0	3	15
GO:0046887 positive regulation of hormone secretion	3	0.0357822	0.223	0.2	Biological Process	GO:0046887	positive regulation of hormone secretion	0.0357822	0.289965	0	0	3	15
GO:0051895 negative regulation of focal adhesion assembly	3	0.0357822	0.223	0.2	Biological Process	GO:0051895	negative regulation of focal adhesion assembly	0.0357822	0.289965	0	0	3	15
GO:0070199 establishment of protein localization to chromosome	3	0.0357822	0.223	0.2	Biological Process	GO:0070199	establishment of protein localization to chromosome	0.0357822	0.289965	0	0	3	15
GO:0070200 establishment of protein localization to telomere	3	0.0357822	0.223	0.2	Biological Process	GO:0070200	establishment of protein localization to telomere	0.0357822	0.289965	0	0	3	15
GO:0090277 positive regulation of peptide hormone secretion	3	0.0357822	0.223	0.2	Biological Process	GO:0090277	positive regulation of peptide hormone secretion	0.0357822	0.289965	0	0	3	15
GO:1901889 negative regulation of cell junction assembly	3	0.0357822	0.223	0.2	Biological Process	GO:1901889	negative regulation of cell junction assembly	0.0357822	0.289965	0	0	3	15
GO:1903392 negative regulation of adherens junction organization	3	0.0357822	0.223	0.2	Biological Process	GO:1903392	negative regulation of adherens junction organization	0.0357822	0.289965	0	0	3	15
GO:0090568 nuclear transcriptional repressor complex	7	0.0359035	0.539	0.109	Cellular Component	GO:0090568	nuclear transcriptional repressor complex	0.0359035	0.202979	0	0	7	64
GO:0009820 alkaloid metabolic process	7	0.0365709	0.52	0.111	Biological Process	GO:0009820	alkaloid metabolic process	0.0365709	0.29569	0	0	7	63
GO:0042726 flavin-containing compound metabolic process	6	0.0369995	0.445	0.12	Biological Process	GO:0042726	flavin-containing compound metabolic process	0.0369995	0.298219	0	0	6	50
GO:0005982 starch metabolic process	13	0.0370494	0.965	0.087	Biological Process	GO:0005982	starch metabolic process	0.0370494	0.298219	0	0	13	150
GO:0036503 ERAD pathway	9	0.0373261	0.668	0.099	Biological Process	GO:0036503	ERAD pathway	0.0373261	0.299775	0	0	9	91
GO:0051716 cellular response to stimulus	334	0.0376578	24.796	0.054	Biological Process	GO:0051716	cellular response to stimulus	0.0376578	0.301766	0	0	334	6158
GO:0002376 immune system process	66	0.0379424	4.9	0.062	Biological Process	GO:0002376	immune system process	0.0379424	0.301865	0	0	66	1062
GO:0006535 cysteine biosynthetic process from serine	4	0.0381736	0.297	0.154	Biological Process	GO:0006535	cysteine biosynthetic process from serine	0.0381736	0.301865	0	0	4	26
GO:0032885 regulation of polysaccharide biosynthetic process	4	0.0381736	0.297	0.154	Biological Process	GO:0032885	regulation of polysaccharide biosynthetic process	0.0381736	0.301865	0	0	4	26
GO:0040017 positive regulation of locomotion	4	0.0381736	0.297	0.154	Biological Process	GO:0040017	positive regulation of locomotion	0.0381736	0.301865	0	0	4	26
GO:0070475 rRNA base methylation	4	0.0381736	0.297	0.154	Biological Process	GO:0070475	rRNA base methylation	0.0381736	0.301865	0	0	4	26
GO:1990641 response to iron ion starvation	4	0.0381736	0.297	0.154	Biological Process	GO:1990641	response to iron ion starvation	0.0381736	0.301865	0	0	4	26
GO:0004702 receptor signaling protein serine/threonine kinase activity	7	0.0383432	0.56	0.109	Molecular Function	GO:0004702	receptor signaling protein serine/threonine kinase activity	0.0383432	0.239488	0	0	7	64
GO:0048571 long-day photoperiodism	13	0.0387705	0.965	0.086	Biological Process	GO:0048571	long-day photoperiodism	0.0387705	0.305913	0	0	13	151
GO:0051087 chaperone binding	8	0.0388853	0.639	0.103	Molecular Function	GO:0051087	chaperone binding	0.0388853	0.241554	0	0	8	78
GO:0001101 response to acid chemical	146	0.0389519	10.839	0.057	Biological Process	GO:0001101	response to acid chemical	0.0389519	0.306602	0	0	146	2547
GO:0032846 positive regulation of homeostatic process	5	0.0390283	0.371	0.132	Biological Process	GO:0032846	positive regulation of homeostatic process	0.0390283	0.306602	0	0	5	38
GO:0044454 nuclear chromosome part	26	0.0396532	2.002	0.07	Cellular Component	GO:0044454	nuclear chromosome part	0.0396532	0.219442	0	0	26	369
GO:0042326 negative regulation of phosphorylation	8	0.0400185	0.594	0.103	Biological Process	GO:0042326	negative regulation of phosphorylation	0.0400185	0.313015	0	0	8	78
GO:0044782 cilium organization	8	0.0400185	0.594	0.103	Biological Process	GO:0044782	cilium organization	0.0400185	0.313015	0	0	8	78
GO:0032586 protein storage vacuole membrane	3	0.0403527	0.231	0.188	Cellular Component	GO:0032586	protein storage vacuole membrane	0.0403527	0.219442	0	0	3	16
GO:0043202 lysosomal lumen	3	0.0403527	0.231	0.188	Cellular Component	GO:0043202	lysosomal lumen	0.0403527	0.219442	0	0	3	16
GO:0045111 intermediate filament cytoskeleton	3	0.0403527	0.231	0.188	Cellular Component	GO:0045111	intermediate filament cytoskeleton	0.0403527	0.219442	0	0	3	16
GO:0042446 hormone biosynthetic process	31	0.0403555	2.301	0.069	Biological Process	GO:0042446	hormone biosynthetic process	0.0403555	0.314966	0	0	31	447
GO:0034765 regulation of ion transmembrane transport	13	0.0405475	0.965	0.086	Biological Process	GO:0034765	regulation of ion transmembrane transport	0.0405475	0.315779	0	0	13	152
GO:0051049 regulation of transport	35	0.0406405	2.598	0.068	Biological Process	GO:0051049	regulation of transport	0.0406405	0.315819	0	0	35	516
GO:0035966 response to topologically incorrect protein	10	0.0407472	0.742	0.093	Biological Process	GO:0035966	response to topologically incorrect protein	0.0407472	0.315966	0	0	10	107
GO:0070201 regulation of establishment of protein localization	12	0.0410336	0.891	0.088	Biological Process	GO:0070201	regulation of establishment of protein localization	0.0410336	0.316229	0	0	12	137
GO:0032555 purine ribonucleotide binding	262	0.0411662	20.943	0.055	Molecular Function	GO:0032555	purine ribonucleotide binding	0.0411662	0.249091	0	0	262	4803
GO:0097367 carbohydrate derivative binding	270	0.041216	21.583	0.054	Molecular Function	GO:0097367	carbohydrate derivative binding	0.041216	0.249091	0	0	270	4959
GO:0015630 microtubule cytoskeleton	42	0.041636	3.233	0.064	Cellular Component	GO:0015630	microtubule cytoskeleton	0.041636	0.223316	0	0	42	652
GO:0004616 phosphogluconate dehydrogenase (decarboxylating) activity	3	0.041842	0.24	0.188	Molecular Function	GO:0004616	phosphogluconate dehydrogenase (decarboxylating) activity	0.041842	0.249091	0	0	3	16
GO:0016530 metallochaperone activity	3	0.041842	0.24	0.188	Molecular Function	GO:0016530	metallochaperone activity	0.041842	0.249091	0	0	3	16
GO:0017112 Rab guanyl-nucleotide exchange factor activity	3	0.041842	0.24	0.188	Molecular Function	GO:0017112	Rab guanyl-nucleotide exchange factor activity	0.041842	0.249091	0	0	3	16
GO:0052622 ATP dimethylallyltransferase activity	3	0.041842	0.24	0.188	Molecular Function	GO:0052622	ATP dimethylallyltransferase activity	0.041842	0.249091	0	0	3	16
GO:0052623 ADP dimethylallyltransferase activity	3	0.041842	0.24	0.188	Molecular Function	GO:0052623	ADP dimethylallyltransferase activity	0.041842	0.249091	0	0	3	16
GO:0097110 scaffold protein binding	3	0.041842	0.24	0.188	Molecular Function	GO:0097110	scaffold protein binding	0.041842	0.249091	0	0	3	16
GO:1901657 glycosyl compound metabolic process	49	0.0419182	3.638	0.064	Biological Process	GO:1901657	glycosyl compound metabolic process	0.0419182	0.316229	0	0	49	763
GO:0010252 auxin homeostasis	9	0.0420125	0.668	0.097	Biological Process	GO:0010252	auxin homeostasis	0.0420125	0.316229	0	0	9	93
GO:0030522 intracellular receptor signaling pathway	9	0.0420125	0.668	0.097	Biological Process	GO:0030522	intracellular receptor signaling pathway	0.0420125	0.316229	0	0	9	93
GO:0031331 positive regulation of cellular catabolic process	15	0.0421145	1.114	0.082	Biological Process	GO:0031331	positive regulation of cellular catabolic process	0.0421145	0.316229	0	0	15	184
GO:0017076 purine nucleotide binding	262	0.0421574	20.943	0.055	Molecular Function	GO:0017076	purine nucleotide binding	0.0421574	0.249668	0	0	262	4806
GO:0009657 plastid organization	32	0.0422661	2.376	0.069	Biological Process	GO:0009657	plastid organization	0.0422661	0.316229	0	0	32	466
GO:0040012 regulation of locomotion	7	0.0423015	0.52	0.108	Biological Process	GO:0040012	regulation of locomotion	0.0423015	0.316229	0	0	7	65
GO:0048519 negative regulation of biological process	175	0.0423522	12.992	0.056	Biological Process	GO:0048519	negative regulation of biological process	0.0423522	0.316229	0	0	175	3105
GO:0030124 AP-4 adaptor complex	2	0.0424351	0.154	0.286	Cellular Component	GO:0030124	AP-4 adaptor complex	0.0424351	0.223316	0	0	2	7
GO:0001824 blastocyst development	3	0.042451	0.223	0.188	Biological Process	GO:0001824	blastocyst development	0.042451	0.316229	0	0	3	16
GO:0010634 positive regulation of epithelial cell migration	3	0.042451	0.223	0.188	Biological Process	GO:0010634	positive regulation of epithelial cell migration	0.042451	0.316229	0	0	3	16
GO:0030072 peptide hormone secretion	3	0.042451	0.223	0.188	Biological Process	GO:0030072	peptide hormone secretion	0.042451	0.316229	0	0	3	16
GO:0030073 insulin secretion	3	0.042451	0.223	0.188	Biological Process	GO:0030073	insulin secretion	0.042451	0.316229	0	0	3	16
GO:0046879 hormone secretion	3	0.042451	0.223	0.188	Biological Process	GO:0046879	hormone secretion	0.042451	0.316229	0	0	3	16
GO:0046883 regulation of hormone secretion	3	0.042451	0.223	0.188	Biological Process	GO:0046883	regulation of hormone secretion	0.042451	0.316229	0	0	3	16
GO:0050796 regulation of insulin secretion	3	0.042451	0.223	0.188	Biological Process	GO:0050796	regulation of insulin secretion	0.042451	0.316229	0	0	3	16
GO:0050905 neuromuscular process	3	0.042451	0.223	0.188	Biological Process	GO:0050905	neuromuscular process	0.042451	0.316229	0	0	3	16
GO:0090276 regulation of peptide hormone secretion	3	0.042451	0.223	0.188	Biological Process	GO:0090276	regulation of peptide hormone secretion	0.042451	0.316229	0	0	3	16
GO:1900368 regulation of RNA interference	3	0.042451	0.223	0.188	Biological Process	GO:1900368	regulation of RNA interference	0.042451	0.316229	0	0	3	16
GO:1901562 response to paraquat	3	0.042451	0.223	0.188	Biological Process	GO:1901562	response to paraquat	0.042451	0.316229	0	0	3	16
GO:0044432 endoplasmic reticulum part	78	0.0424997	6.005	0.059	Cellular Component	GO:0044432	endoplasmic reticulum part	0.0424997	0.223316	0	0	78	1314
GO:0099513 polymeric cytoskeletal fiber	32	0.0428365	2.463	0.067	Cellular Component	GO:0099513	polymeric cytoskeletal fiber	0.0428365	0.223316	0	0	32	476
GO:0007009 plasma membrane organization	5	0.0430011	0.371	0.128	Biological Process	GO:0007009	plasma membrane organization	0.0430011	0.316837	0	0	5	39
GO:0007050 cell cycle arrest	5	0.0430011	0.371	0.128	Biological Process	GO:0007050	cell cycle arrest	0.0430011	0.316837	0	0	5	39
GO:0005773 vacuole	103	0.0430873	7.929	0.058	Cellular Component	GO:0005773	vacuole	0.0430873	0.223316	0	0	103	1786
GO:0030437 ascospore formation	4	0.0431051	0.297	0.148	Biological Process	GO:0030437	ascospore formation	0.0431051	0.316837	0	0	4	27
GO:0043935 sexual sporulation resulting in formation of a cellular spore	4	0.0431051	0.297	0.148	Biological Process	GO:0043935	sexual sporulation resulting in formation of a cellular spore	0.0431051	0.316837	0	0	4	27
GO:1901071 glucosamine-containing compound metabolic process	4	0.0431051	0.297	0.148	Biological Process	GO:1901071	glucosamine-containing compound metabolic process	0.0431051	0.316837	0	0	4	27
GO:0071482 cellular response to light stimulus	26	0.043461	1.93	0.071	Biological Process	GO:0071482	cellular response to light stimulus	0.043461	0.316837	0	0	26	365
GO:0033267 axon part	6	0.0435352	0.462	0.113	Cellular Component	GO:0033267	axon part	0.0435352	0.223316	0	0	6	53
GO:0006952 defense response	143	0.0435432	10.616	0.057	Biological Process	GO:0006952	defense response	0.0435432	0.316837	0	0	143	2501
GO:0000268 peroxisome targeting sequence binding	2	0.0435699	0.16	0.286	Molecular Function	GO:0000268	peroxisome targeting sequence binding	0.0435699	0.254084	0	0	2	7
GO:0004470 malic enzyme activity	2	0.0435699	0.16	0.286	Molecular Function	GO:0004470	malic enzyme activity	0.0435699	0.254084	0	0	2	7
GO:0004471 malate dehydrogenase (decarboxylating) (NAD+) activity	2	0.0435699	0.16	0.286	Molecular Function	GO:0004471	malate dehydrogenase (decarboxylating) (NAD+) activity	0.0435699	0.254084	0	0	2	7
GO:0031346 positive regulation of cell projection organization	6	0.0436438	0.445	0.115	Biological Process	GO:0031346	positive regulation of cell projection organization	0.0436438	0.316837	0	0	6	52
GO:0000786 nucleosome	8	0.0438027	0.616	0.099	Cellular Component	GO:0000786	nucleosome	0.0438027	0.223316	0	0	8	81
GO:0008625 extrinsic apoptotic signaling pathway via death domain receptors	2	0.0440296	0.148	0.286	Biological Process	GO:0008625	extrinsic apoptotic signaling pathway via death domain receptors	0.0440296	0.316837	0	0	2	7
GO:0050900 leukocyte migration	2	0.0440296	0.148	0.286	Biological Process	GO:0050900	leukocyte migration	0.0440296	0.316837	0	0	2	7
GO:0070914 UV-damage excision repair	2	0.0440296	0.148	0.286	Biological Process	GO:0070914	UV-damage excision repair	0.0440296	0.316837	0	0	2	7
GO:0071447 cellular response to hydroperoxide	2	0.0440296	0.148	0.286	Biological Process	GO:0071447	cellular response to hydroperoxide	0.0440296	0.316837	0	0	2	7
GO:0099601 regulation of neurotransmitter receptor activity	2	0.0440296	0.148	0.286	Biological Process	GO:0099601	regulation of neurotransmitter receptor activity	0.0440296	0.316837	0	0	2	7
GO:1900449 regulation of glutamate receptor signaling pathway	2	0.0440296	0.148	0.286	Biological Process	GO:1900449	regulation of glutamate receptor signaling pathway	0.0440296	0.316837	0	0	2	7
GO:1902041 regulation of extrinsic apoptotic signaling pathway via death domain receptors	2	0.0440296	0.148	0.286	Biological Process	GO:1902041	regulation of extrinsic apoptotic signaling pathway via death domain receptors	0.0440296	0.316837	0	0	2	7
GO:1902042 negative regulation of extrinsic apoptotic signaling pathway via death domain receptors	2	0.0440296	0.148	0.286	Biological Process	GO:1902042	negative regulation of extrinsic apoptotic signaling pathway via death domain receptors	0.0440296	0.316837	0	0	2	7
GO:2000310 regulation of N-methyl-D-aspartate selective glutamate receptor activity	2	0.0440296	0.148	0.286	Biological Process	GO:2000310	regulation of N-methyl-D-aspartate selective glutamate receptor activity	0.0440296	0.316837	0	0	2	7
GO:0045229 external encapsulating structure organization	66	0.0444998	4.9	0.062	Biological Process	GO:0045229	external encapsulating structure organization	0.0444998	0.319581	0	0	66	1072
GO:0009809 lignin biosynthetic process	10	0.0453122	0.742	0.092	Biological Process	GO:0009809	lignin biosynthetic process	0.0453122	0.323663	0	0	10	109
GO:0008356 asymmetric cell division	8	0.045428	0.594	0.1	Biological Process	GO:0008356	asymmetric cell division	0.045428	0.323663	0	0	8	80
GO:0035967 cellular response to topologically incorrect protein	8	0.045428	0.594	0.1	Biological Process	GO:0035967	cellular response to topologically incorrect protein	0.045428	0.323663	0	0	8	80
GO:0051222 positive regulation of protein transport	8	0.045428	0.594	0.1	Biological Process	GO:0051222	positive regulation of protein transport	0.045428	0.323663	0	0	8	80
GO:0006109 regulation of carbohydrate metabolic process	9	0.0470794	0.668	0.095	Biological Process	GO:0006109	regulation of carbohydrate metabolic process	0.0470794	0.330569	0	0	9	95
GO:0006241 CTP biosynthetic process	5	0.0472081	0.371	0.125	Biological Process	GO:0006241	CTP biosynthetic process	0.0472081	0.330569	0	0	5	40
GO:0009208 pyrimidine ribonucleoside triphosphate metabolic process	5	0.0472081	0.371	0.125	Biological Process	GO:0009208	pyrimidine ribonucleoside triphosphate metabolic process	0.0472081	0.330569	0	0	5	40
GO:0009209 pyrimidine ribonucleoside triphosphate biosynthetic process	5	0.0472081	0.371	0.125	Biological Process	GO:0009209	pyrimidine ribonucleoside triphosphate biosynthetic process	0.0472081	0.330569	0	0	5	40
GO:0046036 CTP metabolic process	5	0.0472081	0.371	0.125	Biological Process	GO:0046036	CTP metabolic process	0.0472081	0.330569	0	0	5	40
GO:0032549 ribonucleoside binding	259	0.0472112	20.703	0.054	Molecular Function	GO:0032549	ribonucleoside binding	0.0472112	0.262007	0	0	259	4762
GO:0005697 telomerase holoenzyme complex	3	0.0472711	0.231	0.176	Cellular Component	GO:0005697	telomerase holoenzyme complex	0.0472711	0.232688	0	0	3	17
GO:0031010 ISWI-type complex	3	0.0472711	0.231	0.176	Cellular Component	GO:0031010	ISWI-type complex	0.0472711	0.232688	0	0	3	17
GO:0031430 M band	3	0.0472711	0.231	0.176	Cellular Component	GO:0031430	M band	0.0472711	0.232688	0	0	3	17
GO:0031672 A band	3	0.0472711	0.231	0.176	Cellular Component	GO:0031672	A band	0.0472711	0.232688	0	0	3	17
GO:0071949 FAD binding	7	0.047352	0.56	0.104	Molecular Function	GO:0071949	FAD binding	0.047352	0.262007	0	0	7	67
GO:0006265 DNA topological change	4	0.0483773	0.297	0.143	Biological Process	GO:0006265	DNA topological change	0.0483773	0.330569	0	0	4	28
GO:0001882 nucleoside binding	259	0.0486955	20.703	0.054	Molecular Function	GO:0001882	nucleoside binding	0.0486955	0.262007	0	0	259	4766
GO:0005858 axonemal dynein complex	1	0.0488052	0.077	1	Cellular Component	GO:0005858	axonemal dynein complex	0.0488052	0.236168	0	0	1	1
GO:0036156 inner dynein arm	1	0.0488052	0.077	1	Cellular Component	GO:0036156	inner dynein arm	0.0488052	0.236168	0	0	1	1
GO:0009826 unidimensional cell growth	37	0.0488157	2.747	0.066	Biological Process	GO:0009826	unidimensional cell growth	0.0488157	0.330569	0	0	37	559
GO:0001227 transcriptional repressor activity, RNA polymerase II transcription regulatory region sequence-specific binding	3	0.0489909	0.24	0.176	Molecular Function	GO:0001227	transcriptional repressor activity, RNA polymerase II transcription regulatory region sequence-specific binding	0.0489909	0.262007	0	0	3	17
GO:0010698 acetyltransferase activator activity	3	0.0489909	0.24	0.176	Molecular Function	GO:0010698	acetyltransferase activator activity	0.0489909	0.262007	0	0	3	17
GO:0030030 cell projection organization	17	0.0490197	1.262	0.077	Biological Process	GO:0030030	cell projection organization	0.0490197	0.330569	0	0	17	220
GO:0009808 lignin metabolic process	12	0.0492658	0.891	0.085	Biological Process	GO:0009808	lignin metabolic process	0.0492658	0.330569	0	0	12	141
GO:0046873 metal ion transmembrane transporter activity	27	0.0493721	2.158	0.069	Molecular Function	GO:0046873	metal ion transmembrane transporter activity	0.0493721	0.262007	0	0	27	389
GO:0001965 G-protein alpha-subunit binding	1	0.0495132	0.08	1	Molecular Function	GO:0001965	G-protein alpha-subunit binding	0.0495132	0.262007	0	0	1	1
GO:0004038 allantoinase activity	1	0.0495132	0.08	1	Molecular Function	GO:0004038	allantoinase activity	0.0495132	0.262007	0	0	1	1
GO:0008517 folic acid transporter activity	1	0.0495132	0.08	1	Molecular Function	GO:0008517	folic acid transporter activity	0.0495132	0.262007	0	0	1	1
GO:0009899 ent-kaurene synthase activity	1	0.0495132	0.08	1	Molecular Function	GO:0009899	ent-kaurene synthase activity	0.0495132	0.262007	0	0	1	1
GO:0015231 5-formyltetrahydrofolate transporter activity	1	0.0495132	0.08	1	Molecular Function	GO:0015231	5-formyltetrahydrofolate transporter activity	0.0495132	0.262007	0	0	1	1
GO:0015350 methotrexate transporter activity	1	0.0495132	0.08	1	Molecular Function	GO:0015350	methotrexate transporter activity	0.0495132	0.262007	0	0	1	1
GO:0015489 putrescine transmembrane transporter activity	1	0.0495132	0.08	1	Molecular Function	GO:0015489	putrescine transmembrane transporter activity	0.0495132	0.262007	0	0	1	1
GO:0015606 spermidine transmembrane transporter activity	1	0.0495132	0.08	1	Molecular Function	GO:0015606	spermidine transmembrane transporter activity	0.0495132	0.262007	0	0	1	1
GO:0016871 cycloartenol synthase activity	1	0.0495132	0.08	1	Molecular Function	GO:0016871	cycloartenol synthase activity	0.0495132	0.262007	0	0	1	1
GO:0031559 oxidosqualene cyclase activity	1	0.0495132	0.08	1	Molecular Function	GO:0031559	oxidosqualene cyclase activity	0.0495132	0.262007	0	0	1	1
GO:0043027 cysteine-type endopeptidase inhibitor activity involved in apoptotic process	1	0.0495132	0.08	1	Molecular Function	GO:0043027	cysteine-type endopeptidase inhibitor activity involved in apoptotic process	0.0495132	0.262007	0	0	1	1
GO:0043028 cysteine-type endopeptidase regulator activity involved in apoptotic process	1	0.0495132	0.08	1	Molecular Function	GO:0043028	cysteine-type endopeptidase regulator activity involved in apoptotic process	0.0495132	0.262007	0	0	1	1
GO:0047220 galactosylxylosylprotein 3-beta-galactosyltransferase activity	1	0.0495132	0.08	1	Molecular Function	GO:0047220	galactosylxylosylprotein 3-beta-galactosyltransferase activity	0.0495132	0.262007	0	0	1	1
GO:0090415 7-hydroxymethyl chlorophyll a reductase activity	1	0.0495132	0.08	1	Molecular Function	GO:0090415	7-hydroxymethyl chlorophyll a reductase activity	0.0495132	0.262007	0	0	1	1
GO:0044463 cell projection part	15	0.0496035	1.155	0.078	Cellular Component	GO:0044463	cell projection part	0.0496035	0.238014	0	0	15	192
GO:0000270 peptidoglycan metabolic process	3	0.0496935	0.223	0.176	Biological Process	GO:0000270	peptidoglycan metabolic process	0.0496935	0.330569	0	0	3	17
GO:0001952 regulation of cell-matrix adhesion	3	0.0496935	0.223	0.176	Biological Process	GO:0001952	regulation of cell-matrix adhesion	0.0496935	0.330569	0	0	3	17
GO:0007044 cell-substrate junction assembly	3	0.0496935	0.223	0.176	Biological Process	GO:0007044	cell-substrate junction assembly	0.0496935	0.330569	0	0	3	17
GO:0007045 cell-substrate adherens junction assembly	3	0.0496935	0.223	0.176	Biological Process	GO:0007045	cell-substrate adherens junction assembly	0.0496935	0.330569	0	0	3	17
GO:0007160 cell-matrix adhesion	3	0.0496935	0.223	0.176	Biological Process	GO:0007160	cell-matrix adhesion	0.0496935	0.330569	0	0	3	17
GO:0010262 somatic embryogenesis	3	0.0496935	0.223	0.176	Biological Process	GO:0010262	somatic embryogenesis	0.0496935	0.330569	0	0	3	17
GO:0048041 focal adhesion assembly	3	0.0496935	0.223	0.176	Biological Process	GO:0048041	focal adhesion assembly	0.0496935	0.330569	0	0	3	17
GO:0051893 regulation of focal adhesion assembly	3	0.0496935	0.223	0.176	Biological Process	GO:0051893	regulation of focal adhesion assembly	0.0496935	0.330569	0	0	3	17
GO:0070198 protein localization to chromosome, telomeric region	3	0.0496935	0.223	0.176	Biological Process	GO:0070198	protein localization to chromosome, telomeric region	0.0496935	0.330569	0	0	3	17
GO:0090109 regulation of cell-substrate junction assembly	3	0.0496935	0.223	0.176	Biological Process	GO:0090109	regulation of cell-substrate junction assembly	0.0496935	0.330569	0	0	3	17
GO:1901888 regulation of cell junction assembly	3	0.0496935	0.223	0.176	Biological Process	GO:1901888	regulation of cell junction assembly	0.0496935	0.330569	0	0	3	17
GO:1903391 regulation of adherens junction organization	3	0.0496935	0.223	0.176	Biological Process	GO:1903391	regulation of adherens junction organization	0.0496935	0.330569	0	0	3	17
GO:0000488 maturation of LSU-rRNA from tetracistronic rRNA transcript (SSU-rRNA, LSU-rRNA, 4.5S-rRNA, 5S-rRNA)	1	0.0497967	0.074	1	Biological Process	GO:0000488	maturation of LSU-rRNA from tetracistronic rRNA transcript (SSU-rRNA, LSU-rRNA, 4.5S-rRNA, 5S-rRNA)	0.0497967	0.330569	0	0	1	1
GO:0000489 maturation of SSU-rRNA from tetracistronic rRNA transcript (SSU-rRNA, LSU-rRNA, 4.5S-rRNA, 5S-rRNA)	1	0.0497967	0.074	1	Biological Process	GO:0000489	maturation of SSU-rRNA from tetracistronic rRNA transcript (SSU-rRNA, LSU-rRNA, 4.5S-rRNA, 5S-rRNA)	0.0497967	0.330569	0	0	1	1
GO:0010685 tetracyclic triterpenoid metabolic process	1	0.0497967	0.074	1	Biological Process	GO:0010685	tetracyclic triterpenoid metabolic process	0.0497967	0.330569	0	0	1	1
GO:0010686 tetracyclic triterpenoid biosynthetic process	1	0.0497967	0.074	1	Biological Process	GO:0010686	tetracyclic triterpenoid biosynthetic process	0.0497967	0.330569	0	0	1	1
GO:0015848 spermidine transport	1	0.0497967	0.074	1	Biological Process	GO:0015848	spermidine transport	0.0497967	0.330569	0	0	1	1
GO:0015884 folic acid transport	1	0.0497967	0.074	1	Biological Process	GO:0015884	folic acid transport	0.0497967	0.330569	0	0	1	1
GO:0015885 5-formyltetrahydrofolate transport	1	0.0497967	0.074	1	Biological Process	GO:0015885	5-formyltetrahydrofolate transport	0.0497967	0.330569	0	0	1	1
GO:0019742 pentacyclic triterpenoid metabolic process	1	0.0497967	0.074	1	Biological Process	GO:0019742	pentacyclic triterpenoid metabolic process	0.0497967	0.330569	0	0	1	1
GO:0019745 pentacyclic triterpenoid biosynthetic process	1	0.0497967	0.074	1	Biological Process	GO:0019745	pentacyclic triterpenoid biosynthetic process	0.0497967	0.330569	0	0	1	1
GO:0033354 chlorophyll cycle	1	0.0497967	0.074	1	Biological Process	GO:0033354	chlorophyll cycle	0.0497967	0.330569	0	0	1	1
GO:0051071 4,6-pyruvylated galactose residue metabolic process	1	0.0497967	0.074	1	Biological Process	GO:0051071	4,6-pyruvylated galactose residue metabolic process	0.0497967	0.330569	0	0	1	1
GO:0051072 4,6-pyruvylated galactose residue biosynthetic process	1	0.0497967	0.074	1	Biological Process	GO:0051072	4,6-pyruvylated galactose residue biosynthetic process	0.0497967	0.330569	0	0	1	1
GO:0051958 methotrexate transport	1	0.0497967	0.074	1	Biological Process	GO:0051958	methotrexate transport	0.0497967	0.330569	0	0	1	1
GO:0071258 cellular response to gravity	1	0.0497967	0.074	1	Biological Process	GO:0071258	cellular response to gravity	0.0497967	0.330569	0	0	1	1
GO:1903711 spermidine transmembrane transport	1	0.0497967	0.074	1	Biological Process	GO:1903711	spermidine transmembrane transport	0.0497967	0.330569	0	0	1	1
GO:1990619 histone H3-K9 deacetylation	1	0.0497967	0.074	1	Biological Process	GO:1990619	histone H3-K9 deacetylation	0.0497967	0.330569	0	0	1	1
GO:0032879 regulation of localization	41	0.0505587	3.044	0.065	Biological Process	GO:0032879	regulation of localization	0.0505587	0.335009	0	0	41	631
GO:0097237 cellular response to toxic substance	29	0.050734	2.153	0.069	Biological Process	GO:0097237	cellular response to toxic substance	0.050734	0.335553	0	0	29	422
GO:0001883 purine nucleoside binding	258	0.0507971	20.624	0.054	Molecular Function	GO:0001883	purine nucleoside binding	0.0507971	0.264929	0	0	258	4752
GO:0032550 purine ribonucleoside binding	258	0.0507971	20.624	0.054	Molecular Function	GO:0032550	purine ribonucleoside binding	0.0507971	0.264929	0	0	258	4752
GO:0000326 protein storage vacuole	4	0.0507999	0.308	0.138	Cellular Component	GO:0000326	protein storage vacuole	0.0507999	0.241723	0	0	4	29
GO:0080043 quercetin 3-O-glucosyltransferase activity	9	0.0509925	0.719	0.093	Molecular Function	GO:0080043	quercetin 3-O-glucosyltransferase activity	0.0509925	0.264929	0	0	9	97
GO:0080044 quercetin 7-O-glucosyltransferase activity	9	0.0509925	0.719	0.093	Molecular Function	GO:0080044	quercetin 7-O-glucosyltransferase activity	0.0509925	0.264929	0	0	9	97
GO:0051270 regulation of cellular component movement	8	0.0512955	0.594	0.098	Biological Process	GO:0051270	regulation of cellular component movement	0.0512955	0.338644	0	0	8	82
GO:0005875 microtubule associated complex	13	0.0520562	1.001	0.081	Cellular Component	GO:0005875	microtubule associated complex	0.0520562	0.245184	0	0	13	161
GO:0009651 response to salt stress	68	0.052274	5.048	0.061	Biological Process	GO:0009651	response to salt stress	0.052274	0.344457	0	0	68	1119
GO:0030182 neuron differentiation	11	0.0523675	0.817	0.087	Biological Process	GO:0030182	neuron differentiation	0.0523675	0.344457	0	0	11	127
GO:0044815 DNA packaging complex	8	0.0523861	0.616	0.095	Cellular Component	GO:0044815	DNA packaging complex	0.0523861	0.245184	0	0	8	84
GO:0009247 glycolipid biosynthetic process	9	0.052536	0.668	0.093	Biological Process	GO:0009247	glycolipid biosynthetic process	0.052536	0.344935	0	0	9	97
GO:0031981 nuclear lumen	145	0.0531907	11.162	0.056	Cellular Component	GO:0031981	nuclear lumen	0.0531907	0.246926	0	0	145	2611
GO:0046474 glycerophospholipid biosynthetic process	12	0.0537773	0.891	0.084	Biological Process	GO:0046474	glycerophospholipid biosynthetic process	0.0537773	0.350003	0	0	12	143
GO:0051173 positive regulation of nitrogen compound metabolic process	99	0.0538308	7.35	0.058	Biological Process	GO:0051173	positive regulation of nitrogen compound metabolic process	0.0538308	0.350003	0	0	99	1694
GO:0006561 proline biosynthetic process	4	0.0539888	0.297	0.138	Biological Process	GO:0006561	proline biosynthetic process	0.0539888	0.350003	0	0	4	29
GO:0018196 peptidyl-asparagine modification	4	0.0539888	0.297	0.138	Biological Process	GO:0018196	peptidyl-asparagine modification	0.0539888	0.350003	0	0	4	29
GO:0018279 protein N-linked glycosylation via asparagine	4	0.0539888	0.297	0.138	Biological Process	GO:0018279	protein N-linked glycosylation via asparagine	0.0539888	0.350003	0	0	4	29
GO:0022413 reproductive process in single-celled organism	4	0.0539888	0.297	0.138	Biological Process	GO:0022413	reproductive process in single-celled organism	0.0539888	0.350003	0	0	4	29
GO:0032505 reproduction of a single-celled organism	4	0.0539888	0.297	0.138	Biological Process	GO:0032505	reproduction of a single-celled organism	0.0539888	0.350003	0	0	4	29
GO:0010319 stromule	6	0.0545565	0.462	0.107	Cellular Component	GO:0010319	stromule	0.0545565	0.250007	0	0	6	56
GO:0035690 cellular response to drug	19	0.0546789	1.411	0.074	Biological Process	GO:0035690	cellular response to drug	0.0546789	0.353588	0	0	19	256
GO:0031312 extrinsic component of organelle membrane	3	0.05473	0.231	0.167	Cellular Component	GO:0031312	extrinsic component of organelle membrane	0.05473	0.250007	0	0	3	18
GO:0048639 positive regulation of developmental growth	6	0.054928	0.445	0.109	Biological Process	GO:0048639	positive regulation of developmental growth	0.054928	0.353588	0	0	6	55
GO:2000104 negative regulation of DNA-dependent DNA replication	6	0.054928	0.445	0.109	Biological Process	GO:2000104	negative regulation of DNA-dependent DNA replication	0.054928	0.353588	0	0	6	55
GO:0016836 hydro-lyase activity	14	0.0549759	1.119	0.08	Molecular Function	GO:0016836	hydro-lyase activity	0.0549759	0.282957	0	0	14	176
GO:0055114 oxidation-reduction process	157	0.0550125	11.656	0.056	Biological Process	GO:0055114	oxidation-reduction process	0.0550125	0.353588	0	0	157	2790
GO:0034485 phosphatidylinositol-3,4,5-trisphosphate 5-phosphatase activity	5	0.0552051	0.4	0.119	Molecular Function	GO:0034485	phosphatidylinositol-3,4,5-trisphosphate 5-phosphatase activity	0.0552051	0.282957	0	0	5	42
GO:0034594 phosphatidylinositol trisphosphate phosphatase activity	5	0.0552051	0.4	0.119	Molecular Function	GO:0034594	phosphatidylinositol trisphosphate phosphatase activity	0.0552051	0.282957	0	0	5	42
GO:0005886 plasma membrane	287	0.0555962	22.094	0.053	Cellular Component	GO:0005886	plasma membrane	0.0555962	0.251948	0	0	287	5406
GO:0050896 response to stimulus	575	0.056181	42.687	0.052	Biological Process	GO:0050896	response to stimulus	0.056181	0.353588	0	0	575	10976
GO:0008184 glycogen phosphorylase activity	2	0.0562195	0.16	0.25	Molecular Function	GO:0008184	glycogen phosphorylase activity	0.0562195	0.285508	0	0	2	8
GO:0016847 1-aminocyclopropane-1-carboxylate synthase activity	2	0.0562195	0.16	0.25	Molecular Function	GO:0016847	1-aminocyclopropane-1-carboxylate synthase activity	0.0562195	0.285508	0	0	2	8
GO:0034764 positive regulation of transmembrane transport	5	0.056328	0.371	0.119	Biological Process	GO:0034764	positive regulation of transmembrane transport	0.056328	0.353588	0	0	5	42
GO:0043270 positive regulation of ion transport	5	0.056328	0.371	0.119	Biological Process	GO:0043270	positive regulation of ion transport	0.056328	0.353588	0	0	5	42
GO:0097193 intrinsic apoptotic signaling pathway	5	0.056328	0.371	0.119	Biological Process	GO:0097193	intrinsic apoptotic signaling pathway	0.056328	0.353588	0	0	5	42
GO:2000573 positive regulation of DNA biosynthetic process	5	0.056328	0.371	0.119	Biological Process	GO:2000573	positive regulation of DNA biosynthetic process	0.056328	0.353588	0	0	5	42
GO:0047254 2,4-dihydroxy-7-methoxy-2H-1,4-benzoxazin-3(4H)-one 2-D-glucosyltransferase activity	3	0.0566925	0.24	0.167	Molecular Function	GO:0047254	2,4-dihydroxy-7-methoxy-2H-1,4-benzoxazin-3(4H)-one 2-D-glucosyltransferase activity	0.0566925	0.285508	0	0	3	18
GO:0019205 nucleobase-containing compound kinase activity	9	0.0567019	0.719	0.091	Molecular Function	GO:0019205	nucleobase-containing compound kinase activity	0.0567019	0.285508	0	0	9	99
GO:0006723 cuticle hydrocarbon biosynthetic process	2	0.056802	0.148	0.25	Biological Process	GO:0006723	cuticle hydrocarbon biosynthetic process	0.056802	0.353588	0	0	2	8
GO:0010076 maintenance of floral meristem identity	2	0.056802	0.148	0.25	Biological Process	GO:0010076	maintenance of floral meristem identity	0.056802	0.353588	0	0	2	8
GO:0016104 triterpenoid biosynthetic process	2	0.056802	0.148	0.25	Biological Process	GO:0016104	triterpenoid biosynthetic process	0.056802	0.353588	0	0	2	8
GO:0018026 peptidyl-lysine monomethylation	2	0.056802	0.148	0.25	Biological Process	GO:0018026	peptidyl-lysine monomethylation	0.056802	0.353588	0	0	2	8
GO:0018871 1-aminocyclopropane-1-carboxylate metabolic process	2	0.056802	0.148	0.25	Biological Process	GO:0018871	1-aminocyclopropane-1-carboxylate metabolic process	0.056802	0.353588	0	0	2	8
GO:0031214 biomineral tissue development	2	0.056802	0.148	0.25	Biological Process	GO:0031214	biomineral tissue development	0.056802	0.353588	0	0	2	8
GO:0039694 viral RNA genome replication	2	0.056802	0.148	0.25	Biological Process	GO:0039694	viral RNA genome replication	0.056802	0.353588	0	0	2	8
GO:0039703 RNA replication	2	0.056802	0.148	0.25	Biological Process	GO:0039703	RNA replication	0.056802	0.353588	0	0	2	8
GO:0042218 1-aminocyclopropane-1-carboxylate biosynthetic process	2	0.056802	0.148	0.25	Biological Process	GO:0042218	1-aminocyclopropane-1-carboxylate biosynthetic process	0.056802	0.353588	0	0	2	8
GO:0046349 amino sugar biosynthetic process	2	0.056802	0.148	0.25	Biological Process	GO:0046349	amino sugar biosynthetic process	0.056802	0.353588	0	0	2	8
GO:0071461 cellular response to redox state	2	0.056802	0.148	0.25	Biological Process	GO:0071461	cellular response to redox state	0.056802	0.353588	0	0	2	8
GO:1902626 assembly of large subunit precursor of preribosome	2	0.056802	0.148	0.25	Biological Process	GO:1902626	assembly of large subunit precursor of preribosome	0.056802	0.353588	0	0	2	8
GO:1990823 response to leukemia inhibitory factor	2	0.056802	0.148	0.25	Biological Process	GO:1990823	response to leukemia inhibitory factor	0.056802	0.353588	0	0	2	8
GO:1990830 cellular response to leukemia inhibitory factor	2	0.056802	0.148	0.25	Biological Process	GO:1990830	cellular response to leukemia inhibitory factor	0.056802	0.353588	0	0	2	8
GO:0030026 cellular manganese ion homeostasis	3	0.0574937	0.223	0.167	Biological Process	GO:0030026	cellular manganese ion homeostasis	0.0574937	0.357275	0	0	3	18
GO:0032553 ribonucleotide binding	263	0.0578875	21.023	0.054	Molecular Function	GO:0032553	ribonucleotide binding	0.0578875	0.288183	0	0	263	4867
GO:0000166 nucleotide binding	287	0.0579895	22.942	0.054	Molecular Function	GO:0000166	nucleotide binding	0.0579895	0.288183	0	0	287	5337
GO:1901265 nucleoside phosphate binding	287	0.0579895	22.942	0.054	Molecular Function	GO:1901265	nucleoside phosphate binding	0.0579895	0.288183	0	0	287	5337
GO:0009914 hormone transport	17	0.0581197	1.262	0.076	Biological Process	GO:0009914	hormone transport	0.0581197	0.359803	0	0	17	225
GO:0009817 defense response to fungus, incompatible interaction	10	0.0582005	0.742	0.088	Biological Process	GO:0009817	defense response to fungus, incompatible interaction	0.0582005	0.359803	0	0	10	114
GO:0071236 cellular response to antibiotic	10	0.0582005	0.742	0.088	Biological Process	GO:0071236	cellular response to antibiotic	0.0582005	0.359803	0	0	10	114
GO:0009718 anthocyanin-containing compound biosynthetic process	9	0.0583901	0.668	0.091	Biological Process	GO:0009718	anthocyanin-containing compound biosynthetic process	0.0583901	0.360356	0	0	9	99
GO:2000377 regulation of reactive oxygen species metabolic process	12	0.0585597	0.891	0.083	Biological Process	GO:2000377	regulation of reactive oxygen species metabolic process	0.0585597	0.360784	0	0	12	145
GO:0003916 DNA topoisomerase activity	4	0.0589176	0.32	0.133	Molecular Function	GO:0003916	DNA topoisomerase activity	0.0589176	0.291356	0	0	4	30
GO:0016740 transferase activity	333	0.0591378	26.619	0.053	Molecular Function	GO:0016740	transferase activity	0.0591378	0.291356	0	0	333	6244
GO:0005874 microtubule	30	0.0595069	2.309	0.066	Cellular Component	GO:0005874	microtubule	0.0595069	0.267547	0	0	30	455
GO:0046777 protein autophosphorylation	26	0.059541	1.93	0.069	Biological Process	GO:0046777	protein autophosphorylation	0.059541	0.366203	0	0	26	377
GO:0006809 nitric oxide biosynthetic process	4	0.0599366	0.297	0.133	Biological Process	GO:0006809	nitric oxide biosynthetic process	0.0599366	0.367137	0	0	4	30
GO:0046209 nitric oxide metabolic process	4	0.0599366	0.297	0.133	Biological Process	GO:0046209	nitric oxide metabolic process	0.0599366	0.367137	0	0	4	30
GO:0009863 salicylic acid mediated signaling pathway	11	0.059999	0.817	0.085	Biological Process	GO:0009863	salicylic acid mediated signaling pathway	0.059999	0.367137	0	0	11	130
GO:0044389 ubiquitin-like protein ligase binding	18	0.0603096	1.439	0.074	Molecular Function	GO:0044389	ubiquitin-like protein ligase binding	0.0603096	0.295059	0	0	18	244
GO:0035639 purine ribonucleoside triphosphate binding	256	0.0604057	20.464	0.054	Molecular Function	GO:0035639	purine ribonucleoside triphosphate binding	0.0604057	0.295059	0	0	256	4736
GO:0016477 cell migration	10	0.0610378	0.742	0.087	Biological Process	GO:0016477	cell migration	0.0610378	0.372859	0	0	10	115
GO:0050804 modulation of synaptic transmission	5	0.0612412	0.371	0.116	Biological Process	GO:0050804	modulation of synaptic transmission	0.0612412	0.373468	0	0	5	43
GO:0070887 cellular response to chemical stimulus	179	0.0617276	13.289	0.056	Biological Process	GO:0070887	cellular response to chemical stimulus	0.0617276	0.375797	0	0	179	3223
GO:0000152 nuclear ubiquitin ligase complex	5	0.0619618	0.385	0.114	Cellular Component	GO:0000152	nuclear ubiquitin ligase complex	0.0619618	0.273349	0	0	5	44
GO:0030672 synaptic vesicle membrane	3	0.0627123	0.231	0.158	Cellular Component	GO:0030672	synaptic vesicle membrane	0.0627123	0.273349	0	0	3	19
GO:0060187 cell pole	3	0.0627123	0.231	0.158	Cellular Component	GO:0060187	cell pole	0.0627123	0.273349	0	0	3	19
GO:0099501 exocytic vesicle membrane	3	0.0627123	0.231	0.158	Cellular Component	GO:0099501	exocytic vesicle membrane	0.0627123	0.273349	0	0	3	19
GO:0046527 glucosyltransferase activity	21	0.0632799	1.679	0.071	Molecular Function	GO:0046527	glucosyltransferase activity	0.0632799	0.307783	0	0	21	296
GO:0046620 regulation of organ growth	6	0.0633422	0.445	0.105	Biological Process	GO:0046620	regulation of organ growth	0.0633422	0.384975	0	0	6	57
GO:0034762 regulation of transmembrane transport	13	0.0639803	0.965	0.08	Biological Process	GO:0034762	regulation of transmembrane transport	0.0639803	0.388197	0	0	13	163
GO:0031401 positive regulation of protein modification process	23	0.0647361	1.707	0.07	Biological Process	GO:0031401	positive regulation of protein modification process	0.0647361	0.389787	0	0	23	329
GO:0008525 phosphatidylcholine transporter activity	3	0.0649286	0.24	0.158	Molecular Function	GO:0008525	phosphatidylcholine transporter activity	0.0649286	0.313136	0	0	3	19
GO:0008526 phosphatidylinositol transporter activity	3	0.0649286	0.24	0.158	Molecular Function	GO:0008526	phosphatidylinositol transporter activity	0.0649286	0.313136	0	0	3	19
GO:0048471 perinuclear region of cytoplasm	13	0.0657408	1.001	0.078	Cellular Component	GO:0048471	perinuclear region of cytoplasm	0.0657408	0.284379	0	0	13	167
GO:0007162 negative regulation of cell adhesion	3	0.0658325	0.223	0.158	Biological Process	GO:0007162	negative regulation of cell adhesion	0.0658325	0.389787	0	0	3	19
GO:0008630 intrinsic apoptotic signaling pathway in response to DNA damage	3	0.0658325	0.223	0.158	Biological Process	GO:0008630	intrinsic apoptotic signaling pathway in response to DNA damage	0.0658325	0.389787	0	0	3	19
GO:0019184 nonribosomal peptide biosynthetic process	3	0.0658325	0.223	0.158	Biological Process	GO:0019184	nonribosomal peptide biosynthetic process	0.0658325	0.389787	0	0	3	19
GO:0031322 ascospore-type prospore-specific spindle pole body remodeling	3	0.0658325	0.223	0.158	Biological Process	GO:0031322	ascospore-type prospore-specific spindle pole body remodeling	0.0658325	0.389787	0	0	3	19
GO:0034333 adherens junction assembly	3	0.0658325	0.223	0.158	Biological Process	GO:0034333	adherens junction assembly	0.0658325	0.389787	0	0	3	19
GO:0045806 negative regulation of endocytosis	3	0.0658325	0.223	0.158	Biological Process	GO:0045806	negative regulation of endocytosis	0.0658325	0.389787	0	0	3	19
GO:0046928 regulation of neurotransmitter secretion	3	0.0658325	0.223	0.158	Biological Process	GO:0046928	regulation of neurotransmitter secretion	0.0658325	0.389787	0	0	3	19
GO:0051300 spindle pole body organization	3	0.0658325	0.223	0.158	Biological Process	GO:0051300	spindle pole body organization	0.0658325	0.389787	0	0	3	19
GO:0051489 regulation of filopodium assembly	3	0.0658325	0.223	0.158	Biological Process	GO:0051489	regulation of filopodium assembly	0.0658325	0.389787	0	0	3	19
GO:0051491 positive regulation of filopodium assembly	3	0.0658325	0.223	0.158	Biological Process	GO:0051491	positive regulation of filopodium assembly	0.0658325	0.389787	0	0	3	19
GO:0051588 regulation of neurotransmitter transport	3	0.0658325	0.223	0.158	Biological Process	GO:0051588	regulation of neurotransmitter transport	0.0658325	0.389787	0	0	3	19
GO:0070936 protein K48-linked ubiquitination	3	0.0658325	0.223	0.158	Biological Process	GO:0070936	protein K48-linked ubiquitination	0.0658325	0.389787	0	0	3	19
GO:1990395 meiotic spindle pole body organization	3	0.0658325	0.223	0.158	Biological Process	GO:1990395	meiotic spindle pole body organization	0.0658325	0.389787	0	0	3	19
GO:0048580 regulation of post-embryonic development	54	0.0658673	4.009	0.061	Biological Process	GO:0048580	regulation of post-embryonic development	0.0658673	0.389787	0	0	54	879
GO:0010631 epithelial cell migration	4	0.0662168	0.297	0.129	Biological Process	GO:0010631	epithelial cell migration	0.0662168	0.389931	0	0	4	31
GO:0090130 tissue migration	4	0.0662168	0.297	0.129	Biological Process	GO:0090130	tissue migration	0.0662168	0.389931	0	0	4	31
GO:0090132 epithelium migration	4	0.0662168	0.297	0.129	Biological Process	GO:0090132	epithelium migration	0.0662168	0.389931	0	0	4	31
GO:0019200 carbohydrate kinase activity	6	0.0663338	0.48	0.103	Molecular Function	GO:0019200	carbohydrate kinase activity	0.0663338	0.31857	0	0	6	58
GO:0010075 regulation of meristem growth	10	0.0669772	0.742	0.085	Biological Process	GO:0010075	regulation of meristem growth	0.0669772	0.393122	0	0	10	117
GO:0048858 cell projection morphogenesis	10	0.0669772	0.742	0.085	Biological Process	GO:0048858	cell projection morphogenesis	0.0669772	0.393122	0	0	10	117
GO:0071478 cellular response to radiation	26	0.0673525	1.93	0.068	Biological Process	GO:0071478	cellular response to radiation	0.0673525	0.394681	0	0	26	382
GO:0045934 negative regulation of nucleobase-containing compound metabolic process	55	0.0677725	4.083	0.061	Biological Process	GO:0045934	negative regulation of nucleobase-containing compound metabolic process	0.0677725	0.396119	0	0	55	899
GO:0048863 stem cell differentiation	6	0.0678181	0.445	0.103	Biological Process	GO:0048863	stem cell differentiation	0.0678181	0.396119	0	0	6	58
GO:0009539 photosystem II reaction center	2	0.0682022	0.154	0.222	Cellular Component	GO:0009539	photosystem II reaction center	0.0682022	0.292808	0	0	2	9
GO:0071446 cellular response to salicylic acid stimulus	11	0.0683276	0.817	0.083	Biological Process	GO:0071446	cellular response to salicylic acid stimulus	0.0683276	0.398448	0	0	11	133
GO:0034976 response to endoplasmic reticulum stress	12	0.0689548	0.891	0.081	Biological Process	GO:0034976	response to endoplasmic reticulum stress	0.0689548	0.40105	0	0	12	149
GO:0072593 reactive oxygen species metabolic process	26	0.0689967	1.93	0.068	Biological Process	GO:0072593	reactive oxygen species metabolic process	0.0689967	0.40105	0	0	26	383
GO:0031325 positive regulation of cellular metabolic process	103	0.0694263	7.647	0.058	Biological Process	GO:0031325	positive regulation of cellular metabolic process	0.0694263	0.402896	0	0	103	1791
GO:0004077 biotin-[acetyl-CoA-carboxylase] ligase activity	2	0.0699614	0.16	0.222	Molecular Function	GO:0004077	biotin-[acetyl-CoA-carboxylase] ligase activity	0.0699614	0.327729	0	0	2	9
GO:0004078 biotin-[methylcrotonoyl-CoA-carboxylase] ligase activity	2	0.0699614	0.16	0.222	Molecular Function	GO:0004078	biotin-[methylcrotonoyl-CoA-carboxylase] ligase activity	0.0699614	0.327729	0	0	2	9
GO:0004079 biotin-[methylmalonyl-CoA-carboxytransferase] ligase activity	2	0.0699614	0.16	0.222	Molecular Function	GO:0004079	biotin-[methylmalonyl-CoA-carboxytransferase] ligase activity	0.0699614	0.327729	0	0	2	9
GO:0004080 biotin-[propionyl-CoA-carboxylase (ATP-hydrolyzing)] ligase activity	2	0.0699614	0.16	0.222	Molecular Function	GO:0004080	biotin-[propionyl-CoA-carboxylase (ATP-hydrolyzing)] ligase activity	0.0699614	0.327729	0	0	2	9
GO:0009374 biotin binding	2	0.0699614	0.16	0.222	Molecular Function	GO:0009374	biotin binding	0.0699614	0.327729	0	0	2	9
GO:0018271 biotin-protein ligase activity	2	0.0699614	0.16	0.222	Molecular Function	GO:0018271	biotin-protein ligase activity	0.0699614	0.327729	0	0	2	9
GO:0000076 DNA replication checkpoint	2	0.070673	0.148	0.222	Biological Process	GO:0000076	DNA replication checkpoint	0.070673	0.406463	0	0	2	9
GO:0009305 protein biotinylation	2	0.070673	0.148	0.222	Biological Process	GO:0009305	protein biotinylation	0.070673	0.406463	0	0	2	9
GO:0042966 biotin carboxyl carrier protein biosynthetic process	2	0.070673	0.148	0.222	Biological Process	GO:0042966	biotin carboxyl carrier protein biosynthetic process	0.070673	0.406463	0	0	2	9
GO:0070781 response to biotin	2	0.070673	0.148	0.222	Biological Process	GO:0070781	response to biotin	0.070673	0.406463	0	0	2	9
GO:0071110 histone biotinylation	2	0.070673	0.148	0.222	Biological Process	GO:0071110	histone biotinylation	0.070673	0.406463	0	0	2	9
GO:0009084 glutamine family amino acid biosynthetic process	7	0.0708316	0.52	0.096	Biological Process	GO:0009084	glutamine family amino acid biosynthetic process	0.0708316	0.406463	0	0	7	73
GO:0010109 regulation of photosynthesis	7	0.0708316	0.52	0.096	Biological Process	GO:0010109	regulation of photosynthesis	0.0708316	0.406463	0	0	7	73
GO:0003774 motor activity	10	0.0710966	0.799	0.084	Molecular Function	GO:0003774	motor activity	0.0710966	0.331687	0	0	10	119
GO:0005814 centriole	3	0.071199	0.231	0.15	Cellular Component	GO:0005814	centriole	0.071199	0.301146	0	0	3	20
GO:1904115 axon cytoplasm	3	0.071199	0.231	0.15	Cellular Component	GO:1904115	axon cytoplasm	0.071199	0.301146	0	0	3	20
GO:0048037 cofactor binding	100	0.0716078	7.994	0.057	Molecular Function	GO:0048037	cofactor binding	0.0716078	0.332714	0	0	100	1748
GO:0036473 cell death in response to oxidative stress	5	0.0717706	0.371	0.111	Biological Process	GO:0036473	cell death in response to oxidative stress	0.0717706	0.411196	0	0	5	45
GO:0046486 glycerolipid metabolic process	26	0.0723683	1.93	0.068	Biological Process	GO:0046486	glycerolipid metabolic process	0.0723683	0.412234	0	0	26	385
GO:0048544 recognition of pollen	6	0.0724728	0.445	0.102	Biological Process	GO:0048544	recognition of pollen	0.0724728	0.412234	0	0	6	59
GO:0007091 metaphase/anaphase transition of mitotic cell cycle	4	0.0728243	0.297	0.125	Biological Process	GO:0007091	metaphase/anaphase transition of mitotic cell cycle	0.0728243	0.412234	0	0	4	32
GO:0010965 regulation of mitotic sister chromatid separation	4	0.0728243	0.297	0.125	Biological Process	GO:0010965	regulation of mitotic sister chromatid separation	0.0728243	0.412234	0	0	4	32
GO:0030071 regulation of mitotic metaphase/anaphase transition	4	0.0728243	0.297	0.125	Biological Process	GO:0030071	regulation of mitotic metaphase/anaphase transition	0.0728243	0.412234	0	0	4	32
GO:0044784 metaphase/anaphase transition of cell cycle	4	0.0728243	0.297	0.125	Biological Process	GO:0044784	metaphase/anaphase transition of cell cycle	0.0728243	0.412234	0	0	4	32
GO:1902099 regulation of metaphase/anaphase transition of cell cycle	4	0.0728243	0.297	0.125	Biological Process	GO:1902099	regulation of metaphase/anaphase transition of cell cycle	0.0728243	0.412234	0	0	4	32
GO:0009896 positive regulation of catabolic process	15	0.0728684	1.114	0.075	Biological Process	GO:0009896	positive regulation of catabolic process	0.0728684	0.412234	0	0	15	199
GO:0017053 transcriptional repressor complex	7	0.0730427	0.539	0.093	Cellular Component	GO:0017053	transcriptional repressor complex	0.0730427	0.306672	0	0	7	75
GO:0046906 tetrapyrrole binding	36	0.0738574	2.878	0.064	Molecular Function	GO:0046906	tetrapyrrole binding	0.0738574	0.336546	0	0	36	565
GO:0020037 heme binding	32	0.0742678	2.558	0.065	Molecular Function	GO:0020037	heme binding	0.0742678	0.336546	0	0	32	494
GO:0016301 kinase activity	128	0.074288	10.232	0.056	Molecular Function	GO:0016301	kinase activity	0.074288	0.336546	0	0	128	2284
GO:0032268 regulation of cellular protein metabolic process	70	0.0744792	5.197	0.059	Biological Process	GO:0032268	regulation of cellular protein metabolic process	0.0744792	0.417934	0	0	70	1181
GO:0002283 neutrophil activation involved in immune response	3	0.0746891	0.223	0.15	Biological Process	GO:0002283	neutrophil activation involved in immune response	0.0746891	0.417934	0	0	3	20
GO:0002444 myeloid leukocyte mediated immunity	3	0.0746891	0.223	0.15	Biological Process	GO:0002444	myeloid leukocyte mediated immunity	0.0746891	0.417934	0	0	3	20
GO:0002446 neutrophil mediated immunity	3	0.0746891	0.223	0.15	Biological Process	GO:0002446	neutrophil mediated immunity	0.0746891	0.417934	0	0	3	20
GO:0042119 neutrophil activation	3	0.0746891	0.223	0.15	Biological Process	GO:0042119	neutrophil activation	0.0746891	0.417934	0	0	3	20
GO:0043299 leukocyte degranulation	3	0.0746891	0.223	0.15	Biological Process	GO:0043299	leukocyte degranulation	0.0746891	0.417934	0	0	3	20
GO:0043312 neutrophil degranulation	3	0.0746891	0.223	0.15	Biological Process	GO:0043312	neutrophil degranulation	0.0746891	0.417934	0	0	3	20
GO:0035257 nuclear hormone receptor binding	5	0.0759085	0.4	0.109	Molecular Function	GO:0035257	nuclear hormone receptor binding	0.0759085	0.336546	0	0	5	46
GO:0051427 hormone receptor binding	5	0.0759085	0.4	0.109	Molecular Function	GO:0051427	hormone receptor binding	0.0759085	0.336546	0	0	5	46
GO:0030427 site of polarized growth	6	0.0763516	0.462	0.098	Cellular Component	GO:0030427	site of polarized growth	0.0763516	0.318224	0	0	6	61
GO:0032990 cell part morphogenesis	10	0.0765551	0.742	0.083	Biological Process	GO:0032990	cell part morphogenesis	0.0765551	0.42771	0	0	10	120
GO:0030100 regulation of endocytosis	6	0.0773058	0.445	0.1	Biological Process	GO:0030100	regulation of endocytosis	0.0773058	0.42967	0	0	6	60
GO:0009148 pyrimidine nucleoside triphosphate biosynthetic process	5	0.0773836	0.371	0.109	Biological Process	GO:0009148	pyrimidine nucleoside triphosphate biosynthetic process	0.0773836	0.42967	0	0	5	46
GO:0010152 pollen maturation	5	0.0773836	0.371	0.109	Biological Process	GO:0010152	pollen maturation	0.0773836	0.42967	0	0	5	46
GO:0030155 regulation of cell adhesion	5	0.0773836	0.371	0.109	Biological Process	GO:0030155	regulation of cell adhesion	0.0773836	0.42967	0	0	5	46
GO:0006928 movement of cell or subcellular component	22	0.0778578	1.633	0.069	Biological Process	GO:0006928	movement of cell or subcellular component	0.0778578	0.43098	0	0	22	319
GO:0045786 negative regulation of cell cycle	15	0.0778591	1.114	0.075	Biological Process	GO:0045786	negative regulation of cell cycle	0.0778591	0.43098	0	0	15	201
GO:0044430 cytoskeletal part	45	0.0780356	3.464	0.061	Cellular Component	GO:0044430	cytoskeletal part	0.0780356	0.322099	0	0	45	741
GO:1901136 carbohydrate derivative catabolic process	9	0.0783908	0.668	0.086	Biological Process	GO:1901136	carbohydrate derivative catabolic process	0.0783908	0.433257	0	0	9	105
GO:0044437 vacuolar part	63	0.0784094	4.85	0.058	Cellular Component	GO:0044437	vacuolar part	0.0784094	0.322099	0	0	63	1077
GO:0048579 negative regulation of long-day photoperiodism, flowering	7	0.0793975	0.52	0.093	Biological Process	GO:0048579	negative regulation of long-day photoperiodism, flowering	0.0793975	0.438007	0	0	7	75
GO:0031344 regulation of cell projection organization	8	0.0794937	0.594	0.089	Biological Process	GO:0031344	regulation of cell projection organization	0.0794937	0.438007	0	0	8	90
GO:0051972 regulation of telomerase activity	4	0.0797528	0.297	0.121	Biological Process	GO:0051972	regulation of telomerase activity	0.0797528	0.438382	0	0	4	33
GO:0010563 negative regulation of phosphorus metabolic process	10	0.0799273	0.742	0.083	Biological Process	GO:0010563	negative regulation of phosphorus metabolic process	0.0799273	0.438382	0	0	10	121
GO:0045936 negative regulation of phosphate metabolic process	10	0.0799273	0.742	0.083	Biological Process	GO:0045936	negative regulation of phosphate metabolic process	0.0799273	0.438382	0	0	10	121
GO:0060341 regulation of cellular localization	18	0.0801183	1.336	0.071	Biological Process	GO:0060341	regulation of cellular localization	0.0801183	0.438761	0	0	18	252
GO:0032270 positive regulation of cellular protein metabolic process	29	0.0803215	2.153	0.066	Biological Process	GO:0032270	positive regulation of cellular protein metabolic process	0.0803215	0.439205	0	0	29	442
GO:0071944 cell periphery	323	0.0804572	24.865	0.052	Cellular Component	GO:0071944	cell periphery	0.0804572	0.32815	0	0	323	6180
GO:0071310 cellular response to organic substance	148	0.080542	10.987	0.056	Biological Process	GO:0071310	cellular response to organic substance	0.080542	0.439742	0	0	148	2660
GO:0048523 negative regulation of cellular process	133	0.0807973	9.874	0.056	Biological Process	GO:0048523	negative regulation of cellular process	0.0807973	0.440468	0	0	133	2374
GO:0015079 potassium ion transmembrane transporter activity	12	0.0808384	0.959	0.078	Molecular Function	GO:0015079	potassium ion transmembrane transporter activity	0.0808384	0.336546	0	0	12	154
GO:0002020 protease binding	5	0.0816571	0.4	0.106	Molecular Function	GO:0002020	protease binding	0.0816571	0.336546	0	0	5	47
GO:0005506 iron ion binding	31	0.0818948	2.478	0.064	Molecular Function	GO:0005506	iron ion binding	0.0818948	0.336546	0	0	31	481
GO:0030334 regulation of cell migration	6	0.0823162	0.445	0.098	Biological Process	GO:0030334	regulation of cell migration	0.0823162	0.444559	0	0	6	61
GO:0031023 microtubule organizing center organization	6	0.0823162	0.445	0.098	Biological Process	GO:0031023	microtubule organizing center organization	0.0823162	0.444559	0	0	6	61
GO:2000145 regulation of cell motility	6	0.0823162	0.445	0.098	Biological Process	GO:2000145	regulation of cell motility	0.0823162	0.444559	0	0	6	61
GO:0008466 glycogenin glucosyltransferase activity	3	0.0829201	0.24	0.143	Molecular Function	GO:0008466	glycogenin glucosyltransferase activity	0.0829201	0.336546	0	0	3	21
GO:0048027 mRNA 5'-UTR binding	3	0.0829201	0.24	0.143	Molecular Function	GO:0048027	mRNA 5'-UTR binding	0.0829201	0.336546	0	0	3	21
GO:0042744 hydrogen peroxide catabolic process	10	0.0833897	0.742	0.082	Biological Process	GO:0042744	hydrogen peroxide catabolic process	0.0833897	0.444559	0	0	10	122
GO:0043025 neuronal cell body	5	0.0835893	0.385	0.104	Cellular Component	GO:0043025	neuronal cell body	0.0835893	0.338507	0	0	5	48
GO:0010286 heat acclimation	7	0.0838959	0.52	0.092	Biological Process	GO:0010286	heat acclimation	0.0838959	0.444559	0	0	7	76
GO:0002275 myeloid cell activation involved in immune response	3	0.0840403	0.223	0.143	Biological Process	GO:0002275	myeloid cell activation involved in immune response	0.0840403	0.444559	0	0	3	21
GO:0033239 negative regulation of cellular amine metabolic process	3	0.0840403	0.223	0.143	Biological Process	GO:0033239	negative regulation of cellular amine metabolic process	0.0840403	0.444559	0	0	3	21
GO:0034332 adherens junction organization	3	0.0840403	0.223	0.143	Biological Process	GO:0034332	adherens junction organization	0.0840403	0.444559	0	0	3	21
GO:0036230 granulocyte activation	3	0.0840403	0.223	0.143	Biological Process	GO:0036230	granulocyte activation	0.0840403	0.444559	0	0	3	21
GO:0044033 multi-organism metabolic process	3	0.0840403	0.223	0.143	Biological Process	GO:0044033	multi-organism metabolic process	0.0840403	0.444559	0	0	3	21
GO:0045763 negative regulation of cellular amino acid metabolic process	3	0.0840403	0.223	0.143	Biological Process	GO:0045763	negative regulation of cellular amino acid metabolic process	0.0840403	0.444559	0	0	3	21
GO:0048167 regulation of synaptic plasticity	3	0.0840403	0.223	0.143	Biological Process	GO:0048167	regulation of synaptic plasticity	0.0840403	0.444559	0	0	3	21
GO:0048168 regulation of neuronal synaptic plasticity	3	0.0840403	0.223	0.143	Biological Process	GO:0048168	regulation of neuronal synaptic plasticity	0.0840403	0.444559	0	0	3	21
GO:0055071 manganese ion homeostasis	3	0.0840403	0.223	0.143	Biological Process	GO:0055071	manganese ion homeostasis	0.0840403	0.444559	0	0	3	21
GO:0099600 transmembrane receptor activity	29	0.0845248	2.318	0.065	Molecular Function	GO:0099600	transmembrane receptor activity	0.0845248	0.336546	0	0	29	447
GO:0004340 glucokinase activity	2	0.0846565	0.16	0.2	Molecular Function	GO:0004340	glucokinase activity	0.0846565	0.336546	0	0	2	10
GO:0005534 galactose binding	2	0.0846565	0.16	0.2	Molecular Function	GO:0005534	galactose binding	0.0846565	0.336546	0	0	2	10
GO:0017075 syntaxin-1 binding	2	0.0846565	0.16	0.2	Molecular Function	GO:0017075	syntaxin-1 binding	0.0846565	0.336546	0	0	2	10
GO:0019158 mannokinase activity	2	0.0846565	0.16	0.2	Molecular Function	GO:0019158	mannokinase activity	0.0846565	0.336546	0	0	2	10
GO:0001832 blastocyst growth	2	0.0855017	0.148	0.2	Biological Process	GO:0001832	blastocyst growth	0.0855017	0.444559	0	0	2	10
GO:0006171 cAMP biosynthetic process	2	0.0855017	0.148	0.2	Biological Process	GO:0006171	cAMP biosynthetic process	0.0855017	0.444559	0	0	2	10
GO:0010726 positive regulation of hydrogen peroxide metabolic process	2	0.0855017	0.148	0.2	Biological Process	GO:0010726	positive regulation of hydrogen peroxide metabolic process	0.0855017	0.444559	0	0	2	10
GO:0030799 regulation of cyclic nucleotide metabolic process	2	0.0855017	0.148	0.2	Biological Process	GO:0030799	regulation of cyclic nucleotide metabolic process	0.0855017	0.444559	0	0	2	10
GO:0030802 regulation of cyclic nucleotide biosynthetic process	2	0.0855017	0.148	0.2	Biological Process	GO:0030802	regulation of cyclic nucleotide biosynthetic process	0.0855017	0.444559	0	0	2	10
GO:0030814 regulation of cAMP metabolic process	2	0.0855017	0.148	0.2	Biological Process	GO:0030814	regulation of cAMP metabolic process	0.0855017	0.444559	0	0	2	10
GO:0030817 regulation of cAMP biosynthetic process	2	0.0855017	0.148	0.2	Biological Process	GO:0030817	regulation of cAMP biosynthetic process	0.0855017	0.444559	0	0	2	10
GO:0033194 response to hydroperoxide	2	0.0855017	0.148	0.2	Biological Process	GO:0033194	response to hydroperoxide	0.0855017	0.444559	0	0	2	10
GO:0043629 ncRNA polyadenylation	2	0.0855017	0.148	0.2	Biological Process	GO:0043629	ncRNA polyadenylation	0.0855017	0.444559	0	0	2	10
GO:0045761 regulation of adenylate cyclase activity	2	0.0855017	0.148	0.2	Biological Process	GO:0045761	regulation of adenylate cyclase activity	0.0855017	0.444559	0	0	2	10
GO:0046058 cAMP metabolic process	2	0.0855017	0.148	0.2	Biological Process	GO:0046058	cAMP metabolic process	0.0855017	0.444559	0	0	2	10
GO:0051339 regulation of lyase activity	2	0.0855017	0.148	0.2	Biological Process	GO:0051339	regulation of lyase activity	0.0855017	0.444559	0	0	2	10
GO:0097064 ncRNA export from nucleus	2	0.0855017	0.148	0.2	Biological Process	GO:0097064	ncRNA export from nucleus	0.0855017	0.444559	0	0	2	10
GO:1902005 regulation of proline biosynthetic process	2	0.0855017	0.148	0.2	Biological Process	GO:1902005	regulation of proline biosynthetic process	0.0855017	0.444559	0	0	2	10
GO:1902006 negative regulation of proline biosynthetic process	2	0.0855017	0.148	0.2	Biological Process	GO:1902006	negative regulation of proline biosynthetic process	0.0855017	0.444559	0	0	2	10
GO:2000215 negative regulation of proline metabolic process	2	0.0855017	0.148	0.2	Biological Process	GO:2000215	negative regulation of proline metabolic process	0.0855017	0.444559	0	0	2	10
GO:2000283 negative regulation of cellular amino acid biosynthetic process	2	0.0855017	0.148	0.2	Biological Process	GO:2000283	negative regulation of cellular amino acid biosynthetic process	0.0855017	0.444559	0	0	2	10
GO:2000369 regulation of clathrin-mediated endocytosis	2	0.0855017	0.148	0.2	Biological Process	GO:2000369	regulation of clathrin-mediated endocytosis	0.0855017	0.444559	0	0	2	10
GO:0008519 ammonium transmembrane transporter activity	4	0.0855897	0.32	0.118	Molecular Function	GO:0008519	ammonium transmembrane transporter activity	0.0855897	0.336546	0	0	4	34
GO:0015081 sodium ion transmembrane transporter activity	4	0.0855897	0.32	0.118	Molecular Function	GO:0015081	sodium ion transmembrane transporter activity	0.0855897	0.336546	0	0	4	34
GO:0015198 oligopeptide transporter activity	4	0.0855897	0.32	0.118	Molecular Function	GO:0015198	oligopeptide transporter activity	0.0855897	0.336546	0	0	4	34
GO:0035673 oligopeptide transmembrane transporter activity	4	0.0855897	0.32	0.118	Molecular Function	GO:0035673	oligopeptide transmembrane transporter activity	0.0855897	0.336546	0	0	4	34
GO:0009611 response to wounding	34	0.0860487	2.524	0.064	Biological Process	GO:0009611	response to wounding	0.0860487	0.446758	0	0	34	534
GO:0001667 ameboidal-type cell migration	4	0.0869954	0.297	0.118	Biological Process	GO:0001667	ameboidal-type cell migration	0.0869954	0.448438	0	0	4	34
GO:0051306 mitotic sister chromatid separation	4	0.0869954	0.297	0.118	Biological Process	GO:0051306	mitotic sister chromatid separation	0.0869954	0.448438	0	0	4	34
GO:0060491 regulation of cell projection assembly	4	0.0869954	0.297	0.118	Biological Process	GO:0060491	regulation of cell projection assembly	0.0869954	0.448438	0	0	4	34
GO:0071901 negative regulation of protein serine/threonine kinase activity	4	0.0869954	0.297	0.118	Biological Process	GO:0071901	negative regulation of protein serine/threonine kinase activity	0.0869954	0.448438	0	0	4	34
GO:0072488 ammonium transmembrane transport	4	0.0869954	0.297	0.118	Biological Process	GO:0072488	ammonium transmembrane transport	0.0869954	0.448438	0	0	4	34
GO:0004601 peroxidase activity	14	0.0871353	1.119	0.074	Molecular Function	GO:0004601	peroxidase activity	0.0871353	0.336546	0	0	14	189
GO:0031400 negative regulation of protein modification process	14	0.0873784	1.039	0.074	Biological Process	GO:0031400	negative regulation of protein modification process	0.0873784	0.449767	0	0	14	188
GO:0006468 protein phosphorylation	117	0.0875156	8.686	0.056	Biological Process	GO:0006468	protein phosphorylation	0.0875156	0.44983	0	0	117	2078
GO:0048878 chemical homeostasis	51	0.0879639	3.786	0.06	Biological Process	GO:0048878	chemical homeostasis	0.0879639	0.45149	0	0	51	843
GO:0008284 positive regulation of cell proliferation	7	0.0885373	0.52	0.091	Biological Process	GO:0008284	positive regulation of cell proliferation	0.0885373	0.45314	0	0	7	77
GO:0010584 pollen exine formation	7	0.0885373	0.52	0.091	Biological Process	GO:0010584	pollen exine formation	0.0885373	0.45314	0	0	7	77
GO:0031625 ubiquitin protein ligase binding	17	0.0886101	1.359	0.071	Molecular Function	GO:0031625	ubiquitin protein ligase binding	0.0886101	0.336546	0	0	17	240
GO:0000325 plant-type vacuole	22	0.0892293	1.694	0.066	Cellular Component	GO:0000325	plant-type vacuole	0.0892293	0.357775	0	0	22	331
GO:1990778 protein localization to cell periphery	5	0.0892936	0.371	0.104	Biological Process	GO:1990778	protein localization to cell periphery	0.0892936	0.454384	0	0	5	48
GO:0000324 fungal-type vacuole	3	0.0896005	0.231	0.136	Cellular Component	GO:0000324	fungal-type vacuole	0.0896005	0.357775	0	0	3	22
GO:0070063 RNA polymerase binding	6	0.0909339	0.48	0.095	Molecular Function	GO:0070063	RNA polymerase binding	0.0909339	0.336546	0	0	6	63
GO:0060560 developmental growth involved in morphogenesis	41	0.0925332	3.044	0.062	Biological Process	GO:0060560	developmental growth involved in morphogenesis	0.0925332	0.454384	0	0	41	664
GO:0009824 AMP dimethylallyltransferase activity	3	0.0926296	0.24	0.136	Molecular Function	GO:0009824	AMP dimethylallyltransferase activity	0.0926296	0.336546	0	0	3	22
GO:1901135 carbohydrate derivative metabolic process	95	0.0926609	7.053	0.057	Biological Process	GO:1901135	carbohydrate derivative metabolic process	0.0926609	0.454384	0	0	95	1667
GO:0046835 carbohydrate phosphorylation	6	0.0928641	0.445	0.095	Biological Process	GO:0046835	carbohydrate phosphorylation	0.0928641	0.454384	0	0	6	63
GO:0071555 cell wall organization	59	0.0929018	4.38	0.059	Biological Process	GO:0071555	cell wall organization	0.0929018	0.454384	0	0	59	994
GO:0036094 small molecule binding	307	0.0931705	24.54	0.053	Molecular Function	GO:0036094	small molecule binding	0.0931705	0.336546	0	0	307	5802
GO:0016773 phosphotransferase activity, alcohol group as acceptor	119	0.0935983	9.512	0.056	Molecular Function	GO:0016773	phosphotransferase activity, alcohol group as acceptor	0.0935983	0.336546	0	0	119	2136
GO:0050660 flavin adenine dinucleotide binding	16	0.0938333	1.279	0.071	Molecular Function	GO:0050660	flavin adenine dinucleotide binding	0.0938333	0.336546	0	0	16	225
GO:0010594 regulation of endothelial cell migration	3	0.093862	0.223	0.136	Biological Process	GO:0010594	regulation of endothelial cell migration	0.093862	0.454384	0	0	3	22
GO:0021953 central nervous system neuron differentiation	3	0.093862	0.223	0.136	Biological Process	GO:0021953	central nervous system neuron differentiation	0.093862	0.454384	0	0	3	22
GO:0070370 cellular heat acclimation	3	0.093862	0.223	0.136	Biological Process	GO:0070370	cellular heat acclimation	0.093862	0.454384	0	0	3	22
GO:0042803 protein homodimerization activity	35	0.0941595	2.798	0.062	Molecular Function	GO:0042803	protein homodimerization activity	0.0941595	0.336546	0	0	35	560
GO:1903509 liposaccharide metabolic process	10	0.0943176	0.742	0.08	Biological Process	GO:1903509	liposaccharide metabolic process	0.0943176	0.454384	0	0	10	125
GO:0051093 negative regulation of developmental process	28	0.0943779	2.079	0.065	Biological Process	GO:0051093	negative regulation of developmental process	0.0943779	0.454384	0	0	28	432
GO:0035672 oligopeptide transmembrane transport	4	0.094544	0.297	0.114	Biological Process	GO:0035672	oligopeptide transmembrane transport	0.094544	0.454384	0	0	4	35
GO:0008352 katanin complex	1	0.0952303	0.077	0.5	Cellular Component	GO:0008352	katanin complex	0.0952303	0.367409	0	0	1	2
GO:0009512 cytochrome b6f complex	1	0.0952303	0.077	0.5	Cellular Component	GO:0009512	cytochrome b6f complex	0.0952303	0.367409	0	0	1	2
GO:0031257 cell trailing edge membrane	1	0.0952303	0.077	0.5	Cellular Component	GO:0031257	cell trailing edge membrane	0.0952303	0.367409	0	0	1	2
GO:0031417 NatC complex	1	0.0952303	0.077	0.5	Cellular Component	GO:0031417	NatC complex	0.0952303	0.367409	0	0	1	2
GO:0035452 extrinsic component of plastid membrane	1	0.0952303	0.077	0.5	Cellular Component	GO:0035452	extrinsic component of plastid membrane	0.0952303	0.367409	0	0	1	2
GO:0043168 anion binding	307	0.095486	24.54	0.053	Molecular Function	GO:0043168	anion binding	0.095486	0.336546	0	0	307	5806
GO:0007017 microtubule-based process	33	0.0961782	2.45	0.063	Biological Process	GO:0007017	microtubule-based process	0.0961782	0.454384	0	0	33	522
GO:0004672 protein kinase activity	103	0.09623	8.233	0.056	Molecular Function	GO:0004672	protein kinase activity	0.09623	0.336546	0	0	103	1833
GO:0043269 regulation of ion transport	14	0.0962653	1.039	0.073	Biological Process	GO:0043269	regulation of ion transport	0.0962653	0.454384	0	0	14	191
GO:0001530 lipopolysaccharide binding	1	0.0965767	0.08	0.5	Molecular Function	GO:0001530	lipopolysaccharide binding	0.0965767	0.336546	0	0	1	2
GO:0001665 alpha-N-acetylgalactosaminide alpha-2,6-sialyltransferase activity	1	0.0965767	0.08	0.5	Molecular Function	GO:0001665	alpha-N-acetylgalactosaminide alpha-2,6-sialyltransferase activity	0.0965767	0.336546	0	0	1	2
GO:0003858 3-hydroxybutyrate dehydrogenase activity	1	0.0965767	0.08	0.5	Molecular Function	GO:0003858	3-hydroxybutyrate dehydrogenase activity	0.0965767	0.336546	0	0	1	2
GO:0003949 1-(5-phosphoribosyl)-5-[(5-phosphoribosylamino)methylideneamino]imidazole-4-carboxamide isomerase activity	1	0.0965767	0.08	0.5	Molecular Function	GO:0003949	1-(5-phosphoribosyl)-5-[(5-phosphoribosylamino)methylideneamino]imidazole-4-carboxamide isomerase activity	0.0965767	0.336546	0	0	1	2
GO:0004706 JUN kinase kinase kinase activity	1	0.0965767	0.08	0.5	Molecular Function	GO:0004706	JUN kinase kinase kinase activity	0.0965767	0.336546	0	0	1	2
GO:0004779 sulfate adenylyltransferase activity	1	0.0965767	0.08	0.5	Molecular Function	GO:0004779	sulfate adenylyltransferase activity	0.0965767	0.336546	0	0	1	2
GO:0004781 sulfate adenylyltransferase (ATP) activity	1	0.0965767	0.08	0.5	Molecular Function	GO:0004781	sulfate adenylyltransferase (ATP) activity	0.0965767	0.336546	0	0	1	2
GO:0005324 long-chain fatty acid transporter activity	1	0.0965767	0.08	0.5	Molecular Function	GO:0005324	long-chain fatty acid transporter activity	0.0965767	0.336546	0	0	1	2
GO:0005353 fructose transmembrane transporter activity	1	0.0965767	0.08	0.5	Molecular Function	GO:0005353	fructose transmembrane transporter activity	0.0965767	0.336546	0	0	1	2
GO:0008310 single-stranded DNA 3'-5' exodeoxyribonuclease activity	1	0.0965767	0.08	0.5	Molecular Function	GO:0008310	single-stranded DNA 3'-5' exodeoxyribonuclease activity	0.0965767	0.336546	0	0	1	2
GO:0008432 JUN kinase binding	1	0.0965767	0.08	0.5	Molecular Function	GO:0008432	JUN kinase binding	0.0965767	0.336546	0	0	1	2
GO:0008692 3-hydroxybutyryl-CoA epimerase activity	1	0.0965767	0.08	0.5	Molecular Function	GO:0008692	3-hydroxybutyryl-CoA epimerase activity	0.0965767	0.336546	0	0	1	2
GO:0008756 o-succinylbenzoate-CoA ligase activity	1	0.0965767	0.08	0.5	Molecular Function	GO:0008756	o-succinylbenzoate-CoA ligase activity	0.0965767	0.336546	0	0	1	2
GO:0008830 dTDP-4-dehydrorhamnose 3,5-epimerase activity	1	0.0965767	0.08	0.5	Molecular Function	GO:0008830	dTDP-4-dehydrorhamnose 3,5-epimerase activity	0.0965767	0.336546	0	0	1	2
GO:0008831 dTDP-4-dehydrorhamnose reductase activity	1	0.0965767	0.08	0.5	Molecular Function	GO:0008831	dTDP-4-dehydrorhamnose reductase activity	0.0965767	0.336546	0	0	1	2
GO:0008917 lipopolysaccharide N-acetylglucosaminyltransferase activity	1	0.0965767	0.08	0.5	Molecular Function	GO:0008917	lipopolysaccharide N-acetylglucosaminyltransferase activity	0.0965767	0.336546	0	0	1	2
GO:0008928 mannose-1-phosphate guanylyltransferase (GDP) activity	1	0.0965767	0.08	0.5	Molecular Function	GO:0008928	mannose-1-phosphate guanylyltransferase (GDP) activity	0.0965767	0.336546	0	0	1	2
GO:0008987 quinolinate synthetase A activity	1	0.0965767	0.08	0.5	Molecular Function	GO:0008987	quinolinate synthetase A activity	0.0965767	0.336546	0	0	1	2
GO:0009673 low-affinity phosphate transmembrane transporter activity	1	0.0965767	0.08	0.5	Molecular Function	GO:0009673	low-affinity phosphate transmembrane transporter activity	0.0965767	0.336546	0	0	1	2
GO:0010349 L-galactose dehydrogenase activity	1	0.0965767	0.08	0.5	Molecular Function	GO:0010349	L-galactose dehydrogenase activity	0.0965767	0.336546	0	0	1	2
GO:0010471 GDP-galactose:mannose-1-phosphate guanylyltransferase activity	1	0.0965767	0.08	0.5	Molecular Function	GO:0010471	GDP-galactose:mannose-1-phosphate guanylyltransferase activity	0.0965767	0.336546	0	0	1	2
GO:0010472 GDP-galactose:glucose-1-phosphate guanylyltransferase activity	1	0.0965767	0.08	0.5	Molecular Function	GO:0010472	GDP-galactose:glucose-1-phosphate guanylyltransferase activity	0.0965767	0.336546	0	0	1	2
GO:0010473 GDP-galactose:myoinositol-1-phosphate guanylyltransferase activity	1	0.0965767	0.08	0.5	Molecular Function	GO:0010473	GDP-galactose:myoinositol-1-phosphate guanylyltransferase activity	0.0965767	0.336546	0	0	1	2
GO:0010474 glucose-1-phosphate guanylyltransferase (GDP) activity	1	0.0965767	0.08	0.5	Molecular Function	GO:0010474	glucose-1-phosphate guanylyltransferase (GDP) activity	0.0965767	0.336546	0	0	1	2
GO:0010475 galactose-1-phosphate guanylyltransferase (GDP) activity	1	0.0965767	0.08	0.5	Molecular Function	GO:0010475	galactose-1-phosphate guanylyltransferase (GDP) activity	0.0965767	0.336546	0	0	1	2
GO:0015444 magnesium-importing ATPase activity	1	0.0965767	0.08	0.5	Molecular Function	GO:0015444	magnesium-importing ATPase activity	0.0965767	0.336546	0	0	1	2
GO:0016314 phosphatidylinositol-3,4,5-trisphosphate 3-phosphatase activity	1	0.0965767	0.08	0.5	Molecular Function	GO:0016314	phosphatidylinositol-3,4,5-trisphosphate 3-phosphatase activity	0.0965767	0.336546	0	0	1	2
GO:0016712 oxidoreductase activity, acting on paired donors, with incorporation or reduction of molecular oxygen, reduced flavin or flavoprotein as one donor, and incorporation of one atom of oxygen	1	0.0965767	0.08	0.5	Molecular Function	GO:0016712	oxidoreductase activity, acting on paired donors, with incorporation or reduction of molecular oxygen, reduced flavin or flavoprotein as one donor, and incorporation of one atom of oxygen	0.0965767	0.336546	0	0	1	2
GO:0016856 racemase and epimerase activity, acting on hydroxy acids and derivatives	1	0.0965767	0.08	0.5	Molecular Function	GO:0016856	racemase and epimerase activity, acting on hydroxy acids and derivatives	0.0965767	0.336546	0	0	1	2
GO:0030794 (S)-coclaurine-N-methyltransferase activity	1	0.0965767	0.08	0.5	Molecular Function	GO:0030794	(S)-coclaurine-N-methyltransferase activity	0.0965767	0.336546	0	0	1	2
GO:0031434 mitogen-activated protein kinase kinase binding	1	0.0965767	0.08	0.5	Molecular Function	GO:0031434	mitogen-activated protein kinase kinase binding	0.0965767	0.336546	0	0	1	2
GO:0033773 isoflavone 2'-hydroxylase activity	1	0.0965767	0.08	0.5	Molecular Function	GO:0033773	isoflavone 2'-hydroxylase activity	0.0965767	0.336546	0	0	1	2
GO:0036204 abieta-7,13-dien-18-ol hydroxylase activity	1	0.0965767	0.08	0.5	Molecular Function	GO:0036204	abieta-7,13-dien-18-ol hydroxylase activity	0.0965767	0.336546	0	0	1	2
GO:0045157 electron transporter, transferring electrons within the noncyclic electron transport pathway of photosynthesis activity	1	0.0965767	0.08	0.5	Molecular Function	GO:0045157	electron transporter, transferring electrons within the noncyclic electron transport pathway of photosynthesis activity	0.0965767	0.336546	0	0	1	2
GO:0045290 D-arabinose 1-dehydrogenase [NAD(P)+] activity	1	0.0965767	0.08	0.5	Molecular Function	GO:0045290	D-arabinose 1-dehydrogenase [NAD(P)+] activity	0.0965767	0.336546	0	0	1	2
GO:0046403 polynucleotide 3'-phosphatase activity	1	0.0965767	0.08	0.5	Molecular Function	GO:0046403	polynucleotide 3'-phosphatase activity	0.0965767	0.336546	0	0	1	2
GO:0046404 ATP-dependent polydeoxyribonucleotide 5'-hydroxyl-kinase activity	1	0.0965767	0.08	0.5	Molecular Function	GO:0046404	ATP-dependent polydeoxyribonucleotide 5'-hydroxyl-kinase activity	0.0965767	0.336546	0	0	1	2
GO:0047816 D-arabinose 1-dehydrogenase (NAD) activity	1	0.0965767	0.08	0.5	Molecular Function	GO:0047816	D-arabinose 1-dehydrogenase (NAD) activity	0.0965767	0.336546	0	0	1	2
GO:0047964 glyoxylate reductase activity	1	0.0965767	0.08	0.5	Molecular Function	GO:0047964	glyoxylate reductase activity	0.0965767	0.336546	0	0	1	2
GO:0048244 phytanoyl-CoA dioxygenase activity	1	0.0965767	0.08	0.5	Molecular Function	GO:0048244	phytanoyl-CoA dioxygenase activity	0.0965767	0.336546	0	0	1	2
GO:0051019 mitogen-activated protein kinase binding	1	0.0965767	0.08	0.5	Molecular Function	GO:0051019	mitogen-activated protein kinase binding	0.0965767	0.336546	0	0	1	2
GO:0051377 mannose-ethanolamine phosphotransferase activity	1	0.0965767	0.08	0.5	Molecular Function	GO:0051377	mannose-ethanolamine phosphotransferase activity	0.0965767	0.336546	0	0	1	2
GO:0051733 polydeoxyribonucleotide kinase activity	1	0.0965767	0.08	0.5	Molecular Function	GO:0051733	polydeoxyribonucleotide kinase activity	0.0965767	0.336546	0	0	1	2
GO:0051734 ATP-dependent polynucleotide kinase activity	1	0.0965767	0.08	0.5	Molecular Function	GO:0051734	ATP-dependent polynucleotide kinase activity	0.0965767	0.336546	0	0	1	2
GO:0051800 phosphatidylinositol-3,4-bisphosphate 3-phosphatase activity	1	0.0965767	0.08	0.5	Molecular Function	GO:0051800	phosphatidylinositol-3,4-bisphosphate 3-phosphatase activity	0.0965767	0.336546	0	0	1	2
GO:0052902 spermidine:oxygen oxidoreductase (3-aminopropanal-forming) activity	1	0.0965767	0.08	0.5	Molecular Function	GO:0052902	spermidine:oxygen oxidoreductase (3-aminopropanal-forming) activity	0.0965767	0.336546	0	0	1	2
GO:0052903 N1-acetylspermine:oxygen oxidoreductase (3-acetamidopropanal-forming) activity	1	0.0965767	0.08	0.5	Molecular Function	GO:0052903	N1-acetylspermine:oxygen oxidoreductase (3-acetamidopropanal-forming) activity	0.0965767	0.336546	0	0	1	2
GO:0052904 N1-acetylspermidine:oxygen oxidoreductase (3-acetamidopropanal-forming) activity	1	0.0965767	0.08	0.5	Molecular Function	GO:0052904	N1-acetylspermidine:oxygen oxidoreductase (3-acetamidopropanal-forming) activity	0.0965767	0.336546	0	0	1	2
GO:0052925 dol-P-Man:Man(5)GlcNAc(2)-PP-Dol alpha-1,3-mannosyltransferase activity	1	0.0965767	0.08	0.5	Molecular Function	GO:0052925	dol-P-Man:Man(5)GlcNAc(2)-PP-Dol alpha-1,3-mannosyltransferase activity	0.0965767	0.336546	0	0	1	2
GO:0070330 aromatase activity	1	0.0965767	0.08	0.5	Molecular Function	GO:0070330	aromatase activity	0.0965767	0.336546	0	0	1	2
GO:0070774 phytoceramidase activity	1	0.0965767	0.08	0.5	Molecular Function	GO:0070774	phytoceramidase activity	0.0965767	0.336546	0	0	1	2
GO:0080047 GDP-L-galactose phosphorylase activity	1	0.0965767	0.08	0.5	Molecular Function	GO:0080047	GDP-L-galactose phosphorylase activity	0.0965767	0.336546	0	0	1	2
GO:0080048 GDP-D-glucose phosphorylase activity	1	0.0965767	0.08	0.5	Molecular Function	GO:0080048	GDP-D-glucose phosphorylase activity	0.0965767	0.336546	0	0	1	2
GO:0045087 innate immune response	50	0.0966807	3.712	0.06	Biological Process	GO:0045087	innate immune response	0.0966807	0.454384	0	0	50	831
GO:0098542 defense response to other organism	84	0.0970384	6.236	0.057	Biological Process	GO:0098542	defense response to other organism	0.0970384	0.454384	0	0	84	1464
GO:0000183 chromatin silencing at rDNA	1	0.0971154	0.074	0.5	Biological Process	GO:0000183	chromatin silencing at rDNA	0.0971154	0.454384	0	0	1	2
GO:0006335 DNA replication-dependent nucleosome assembly	1	0.0971154	0.074	0.5	Biological Process	GO:0006335	DNA replication-dependent nucleosome assembly	0.0971154	0.454384	0	0	1	2
GO:0007256 activation of JNKK activity	1	0.0971154	0.074	0.5	Biological Process	GO:0007256	activation of JNKK activity	0.0971154	0.454384	0	0	1	2
GO:0007319 negative regulation of oskar mRNA translation	1	0.0971154	0.074	0.5	Biological Process	GO:0007319	negative regulation of oskar mRNA translation	0.0971154	0.454384	0	0	1	2
GO:0010270 photosystem II oxygen evolving complex assembly	1	0.0971154	0.074	0.5	Biological Process	GO:0010270	photosystem II oxygen evolving complex assembly	0.0971154	0.454384	0	0	1	2
GO:0010618 aerenchyma formation	1	0.0971154	0.074	0.5	Biological Process	GO:0010618	aerenchyma formation	0.0971154	0.454384	0	0	1	2
GO:0010777 meiotic mismatch repair involved in reciprocal meiotic recombination	1	0.0971154	0.074	0.5	Biological Process	GO:0010777	meiotic mismatch repair involved in reciprocal meiotic recombination	0.0971154	0.454384	0	0	1	2
GO:0014065 phosphatidylinositol 3-kinase signaling	1	0.0971154	0.074	0.5	Biological Process	GO:0014065	phosphatidylinositol 3-kinase signaling	0.0971154	0.454384	0	0	1	2
GO:0015755 fructose transport	1	0.0971154	0.074	0.5	Biological Process	GO:0015755	fructose transport	0.0971154	0.454384	0	0	1	2
GO:0019805 quinolinate biosynthetic process	1	0.0971154	0.074	0.5	Biological Process	GO:0019805	quinolinate biosynthetic process	0.0971154	0.454384	0	0	1	2
GO:0030493 bacteriochlorophyll metabolic process	1	0.0971154	0.074	0.5	Biological Process	GO:0030493	bacteriochlorophyll metabolic process	0.0971154	0.454384	0	0	1	2
GO:0030494 bacteriochlorophyll biosynthetic process	1	0.0971154	0.074	0.5	Biological Process	GO:0030494	bacteriochlorophyll biosynthetic process	0.0971154	0.454384	0	0	1	2
GO:0032069 regulation of nuclease activity	1	0.0971154	0.074	0.5	Biological Process	GO:0032069	regulation of nuclease activity	0.0971154	0.454384	0	0	1	2
GO:0032074 negative regulation of nuclease activity	1	0.0971154	0.074	0.5	Biological Process	GO:0032074	negative regulation of nuclease activity	0.0971154	0.454384	0	0	1	2
GO:0032231 regulation of actin filament bundle assembly	1	0.0971154	0.074	0.5	Biological Process	GO:0032231	regulation of actin filament bundle assembly	0.0971154	0.454384	0	0	1	2
GO:0032232 negative regulation of actin filament bundle assembly	1	0.0971154	0.074	0.5	Biological Process	GO:0032232	negative regulation of actin filament bundle assembly	0.0971154	0.454384	0	0	1	2
GO:0034264 isopentenyl adenine metabolic process	1	0.0971154	0.074	0.5	Biological Process	GO:0034264	isopentenyl adenine metabolic process	0.0971154	0.454384	0	0	1	2
GO:0034265 isopentenyl adenine biosynthetic process	1	0.0971154	0.074	0.5	Biological Process	GO:0034265	isopentenyl adenine biosynthetic process	0.0971154	0.454384	0	0	1	2
GO:0034723 DNA replication-dependent nucleosome organization	1	0.0971154	0.074	0.5	Biological Process	GO:0034723	DNA replication-dependent nucleosome organization	0.0971154	0.454384	0	0	1	2
GO:0036051 protein localization to trailing edge	1	0.0971154	0.074	0.5	Biological Process	GO:0036051	protein localization to trailing edge	0.0971154	0.454384	0	0	1	2
GO:0036052 protein localization to uropod	1	0.0971154	0.074	0.5	Biological Process	GO:0036052	protein localization to uropod	0.0971154	0.454384	0	0	1	2
GO:0036070 light-independent bacteriochlorophyll biosynthetic process	1	0.0971154	0.074	0.5	Biological Process	GO:0036070	light-independent bacteriochlorophyll biosynthetic process	0.0971154	0.454384	0	0	1	2
GO:0046011 regulation of oskar mRNA translation	1	0.0971154	0.074	0.5	Biological Process	GO:0046011	regulation of oskar mRNA translation	0.0971154	0.454384	0	0	1	2
GO:0048520 positive regulation of behavior	1	0.0971154	0.074	0.5	Biological Process	GO:0048520	positive regulation of behavior	0.0971154	0.454384	0	0	1	2
GO:0050919 negative chemotaxis	1	0.0971154	0.074	0.5	Biological Process	GO:0050919	negative chemotaxis	0.0971154	0.454384	0	0	1	2
GO:0050920 regulation of chemotaxis	1	0.0971154	0.074	0.5	Biological Process	GO:0050920	regulation of chemotaxis	0.0971154	0.454384	0	0	1	2
GO:0050921 positive regulation of chemotaxis	1	0.0971154	0.074	0.5	Biological Process	GO:0050921	positive regulation of chemotaxis	0.0971154	0.454384	0	0	1	2
GO:0060250 germ-line stem-cell niche homeostasis	1	0.0971154	0.074	0.5	Biological Process	GO:0060250	germ-line stem-cell niche homeostasis	0.0971154	0.454384	0	0	1	2
GO:0060700 regulation of ribonuclease activity	1	0.0971154	0.074	0.5	Biological Process	GO:0060700	regulation of ribonuclease activity	0.0971154	0.454384	0	0	1	2
GO:0060701 negative regulation of ribonuclease activity	1	0.0971154	0.074	0.5	Biological Process	GO:0060701	negative regulation of ribonuclease activity	0.0971154	0.454384	0	0	1	2
GO:0061388 regulation of rate of cell growth	1	0.0971154	0.074	0.5	Biological Process	GO:0061388	regulation of rate of cell growth	0.0971154	0.454384	0	0	1	2
GO:0070484 dehydro-D-arabinono-1,4-lactone metabolic process	1	0.0971154	0.074	0.5	Biological Process	GO:0070484	dehydro-D-arabinono-1,4-lactone metabolic process	0.0971154	0.454384	0	0	1	2
GO:0070485 dehydro-D-arabinono-1,4-lactone biosynthetic process	1	0.0971154	0.074	0.5	Biological Process	GO:0070485	dehydro-D-arabinono-1,4-lactone biosynthetic process	0.0971154	0.454384	0	0	1	2
GO:0071602 phytosphingosine biosynthetic process	1	0.0971154	0.074	0.5	Biological Process	GO:0071602	phytosphingosine biosynthetic process	0.0971154	0.454384	0	0	1	2
GO:0080065 4-alpha-methyl-delta7-sterol oxidation	1	0.0971154	0.074	0.5	Biological Process	GO:0080065	4-alpha-methyl-delta7-sterol oxidation	0.0971154	0.454384	0	0	1	2
GO:0090229 negative regulation of red or far-red light signaling pathway	1	0.0971154	0.074	0.5	Biological Process	GO:0090229	negative regulation of red or far-red light signaling pathway	0.0971154	0.454384	0	0	1	2
GO:0090549 response to carbon starvation	1	0.0971154	0.074	0.5	Biological Process	GO:0090549	response to carbon starvation	0.0971154	0.454384	0	0	1	2
GO:0098502 DNA dephosphorylation	1	0.0971154	0.074	0.5	Biological Process	GO:0098502	DNA dephosphorylation	0.0971154	0.454384	0	0	1	2
GO:0098503 DNA 3' dephosphorylation	1	0.0971154	0.074	0.5	Biological Process	GO:0098503	DNA 3' dephosphorylation	0.0971154	0.454384	0	0	1	2
GO:0098504 DNA 3' dephosphorylation involved in DNA repair	1	0.0971154	0.074	0.5	Biological Process	GO:0098504	DNA 3' dephosphorylation involved in DNA repair	0.0971154	0.454384	0	0	1	2
GO:0098506 polynucleotide 3' dephosphorylation	1	0.0971154	0.074	0.5	Biological Process	GO:0098506	polynucleotide 3' dephosphorylation	0.0971154	0.454384	0	0	1	2
GO:1901917 regulation of exoribonuclease activity	1	0.0971154	0.074	0.5	Biological Process	GO:1901917	regulation of exoribonuclease activity	0.0971154	0.454384	0	0	1	2
GO:1901918 negative regulation of exoribonuclease activity	1	0.0971154	0.074	0.5	Biological Process	GO:1901918	negative regulation of exoribonuclease activity	0.0971154	0.454384	0	0	1	2
GO:1902667 regulation of axon guidance	1	0.0971154	0.074	0.5	Biological Process	GO:1902667	regulation of axon guidance	0.0971154	0.454384	0	0	1	2
GO:1902669 positive regulation of axon guidance	1	0.0971154	0.074	0.5	Biological Process	GO:1902669	positive regulation of axon guidance	0.0971154	0.454384	0	0	1	2
GO:1904355 positive regulation of telomere capping	1	0.0971154	0.074	0.5	Biological Process	GO:1904355	positive regulation of telomere capping	0.0971154	0.454384	0	0	1	2
GO:2000539 regulation of protein geranylgeranylation	1	0.0971154	0.074	0.5	Biological Process	GO:2000539	regulation of protein geranylgeranylation	0.0971154	0.454384	0	0	1	2
GO:2000541 positive regulation of protein geranylgeranylation	1	0.0971154	0.074	0.5	Biological Process	GO:2000541	positive regulation of protein geranylgeranylation	0.0971154	0.454384	0	0	1	2
GO:2000641 regulation of early endosome to late endosome transport	1	0.0971154	0.074	0.5	Biological Process	GO:2000641	regulation of early endosome to late endosome transport	0.0971154	0.454384	0	0	1	2
GO:2000643 positive regulation of early endosome to late endosome transport	1	0.0971154	0.074	0.5	Biological Process	GO:2000643	positive regulation of early endosome to late endosome transport	0.0971154	0.454384	0	0	1	2
GO:2000786 positive regulation of autophagosome assembly	1	0.0971154	0.074	0.5	Biological Process	GO:2000786	positive regulation of autophagosome assembly	0.0971154	0.454384	0	0	1	2
GO:0017148 negative regulation of translation	17	0.0975277	1.262	0.07	Biological Process	GO:0017148	negative regulation of translation	0.0975277	0.45454	0	0	17	242
GO:0022604 regulation of cell morphogenesis	17	0.0975277	1.262	0.07	Biological Process	GO:0022604	regulation of cell morphogenesis	0.0975277	0.45454	0	0	17	242
GO:0034249 negative regulation of cellular amide metabolic process	17	0.0975277	1.262	0.07	Biological Process	GO:0034249	negative regulation of cellular amide metabolic process	0.0975277	0.45454	0	0	17	242
GO:0051054 positive regulation of DNA metabolic process	9	0.0978859	0.668	0.082	Biological Process	GO:0051054	positive regulation of DNA metabolic process	0.0978859	0.455619	0	0	9	110
GO:0030001 metal ion transport	37	0.0980127	2.747	0.062	Biological Process	GO:0030001	metal ion transport	0.0980127	0.45562	0	0	37	595
GO:0007067 mitotic nuclear division	13	0.0982174	0.965	0.074	Biological Process	GO:0007067	mitotic nuclear division	0.0982174	0.455982	0	0	13	175
GO:0048638 regulation of developmental growth	25	0.0983491	1.856	0.066	Biological Process	GO:0048638	regulation of developmental growth	0.0983491	0.456005	0	0	25	381
GO:0004683 calmodulin-dependent protein kinase activity	8	0.0985436	0.639	0.084	Molecular Function	GO:0004683	calmodulin-dependent protein kinase activity	0.0985436	0.342356	0	0	8	95
GO:0019941 modification-dependent protein catabolic process	57	0.0994391	4.232	0.059	Biological Process	GO:0019941	modification-dependent protein catabolic process	0.0994391	0.460466	0	0	57	962
GO:0035618 root hair	3	0.0994693	0.231	0.13	Cellular Component	GO:0035618	root hair	0.0994693	0.381188	0	0	3	23
GO:0012501 programmed cell death	38	0.099579	2.821	0.062	Biological Process	GO:0012501	programmed cell death	0.099579	0.460521	0	0	38	614
GO:0006869 lipid transport	18	0.0999994	1.336	0.069	Biological Process	GO:0006869	lipid transport	0.0999994	0.461077	0	0	18	260
GO:0004301 epoxide hydrolase activity	2	0.100177	0.16	0.182	Molecular Function	GO:0004301	epoxide hydrolase activity	0.100177	0.34405	0	0	2	11
GO:0016803 ether hydrolase activity	2	0.100177	0.16	0.182	Molecular Function	GO:0016803	ether hydrolase activity	0.100177	0.34405	0	0	2	11
GO:0045300 acyl-[acyl-carrier-protein] desaturase activity	2	0.100177	0.16	0.182	Molecular Function	GO:0045300	acyl-[acyl-carrier-protein] desaturase activity	0.100177	0.34405	0	0	2	11
GO:0005385 zinc ion transmembrane transporter activity	5	0.100235	0.4	0.1	Molecular Function	GO:0005385	zinc ion transmembrane transporter activity	0.100235	0.34405	0	0	5	50
GO:0010770 positive regulation of cell morphogenesis involved in differentiation	2	0.101158	0.148	0.182	Biological Process	GO:0010770	positive regulation of cell morphogenesis involved in differentiation	0.101158	0.461077	0	0	2	11
GO:0046622 positive regulation of organ growth	2	0.101158	0.148	0.182	Biological Process	GO:0046622	positive regulation of organ growth	0.101158	0.461077	0	0	2	11
GO:0050772 positive regulation of axonogenesis	2	0.101158	0.148	0.182	Biological Process	GO:0050772	positive regulation of axonogenesis	0.101158	0.461077	0	0	2	11
GO:0051754 meiotic sister chromatid cohesion, centromeric	2	0.101158	0.148	0.182	Biological Process	GO:0051754	meiotic sister chromatid cohesion, centromeric	0.101158	0.461077	0	0	2	11
GO:0060145 viral gene silencing in virus induced gene silencing	2	0.101158	0.148	0.182	Biological Process	GO:0060145	viral gene silencing in virus induced gene silencing	0.101158	0.461077	0	0	2	11
GO:0097191 extrinsic apoptotic signaling pathway	2	0.101158	0.148	0.182	Biological Process	GO:0097191	extrinsic apoptotic signaling pathway	0.101158	0.461077	0	0	2	11
GO:2001236 regulation of extrinsic apoptotic signaling pathway	2	0.101158	0.148	0.182	Biological Process	GO:2001236	regulation of extrinsic apoptotic signaling pathway	0.101158	0.461077	0	0	2	11
GO:2001237 negative regulation of extrinsic apoptotic signaling pathway	2	0.101158	0.148	0.182	Biological Process	GO:2001237	negative regulation of extrinsic apoptotic signaling pathway	0.101158	0.461077	0	0	2	11
GO:2001244 positive regulation of intrinsic apoptotic signaling pathway	2	0.101158	0.148	0.182	Biological Process	GO:2001244	positive regulation of intrinsic apoptotic signaling pathway	0.101158	0.461077	0	0	2	11
GO:0009057 macromolecule catabolic process	105	0.101227	7.795	0.056	Biological Process	GO:0009057	macromolecule catabolic process	0.101227	0.461077	0	0	105	1865
GO:0009744 response to sucrose	13	0.101493	0.965	0.074	Biological Process	GO:0009744	response to sucrose	0.101493	0.461077	0	0	13	176
GO:0034285 response to disaccharide	13	0.101493	0.965	0.074	Biological Process	GO:0034285	response to disaccharide	0.101493	0.461077	0	0	13	176
GO:2000242 negative regulation of reproductive process	13	0.101493	0.965	0.074	Biological Process	GO:2000242	negative regulation of reproductive process	0.101493	0.461077	0	0	13	176
GO:0030031 cell projection assembly	9	0.102093	0.668	0.081	Biological Process	GO:0030031	cell projection assembly	0.102093	0.461474	0	0	9	111
GO:0046856 phosphatidylinositol dephosphorylation	5	0.102094	0.371	0.1	Biological Process	GO:0046856	phosphatidylinositol dephosphorylation	0.102094	0.461474	0	0	5	50
GO:0048812 neuron projection morphogenesis	5	0.102094	0.371	0.1	Biological Process	GO:0048812	neuron projection morphogenesis	0.102094	0.461474	0	0	5	50
GO:0071577 zinc II ion transmembrane transport	5	0.102094	0.371	0.1	Biological Process	GO:0071577	zinc II ion transmembrane transport	0.102094	0.461474	0	0	5	50
GO:2001233 regulation of apoptotic signaling pathway	4	0.10239	0.297	0.111	Biological Process	GO:2001233	regulation of apoptotic signaling pathway	0.10239	0.461967	0	0	4	36
GO:0044297 cell body	6	0.102393	0.462	0.091	Cellular Component	GO:0044297	cell body	0.102393	0.389776	0	0	6	66
GO:2000113 negative regulation of cellular macromolecule biosynthetic process	56	0.102889	4.157	0.059	Biological Process	GO:2000113	negative regulation of cellular macromolecule biosynthetic process	0.102889	0.461967	0	0	56	946
GO:0005261 cation channel activity	9	0.10364	0.719	0.08	Molecular Function	GO:0005261	cation channel activity	0.10364	0.354673	0	0	9	112
GO:0009875 pollen-pistil interaction	6	0.104103	0.445	0.092	Biological Process	GO:0009875	pollen-pistil interaction	0.104103	0.461967	0	0	6	65
GO:1903409 reactive oxygen species biosynthetic process	6	0.104103	0.445	0.092	Biological Process	GO:1903409	reactive oxygen species biosynthetic process	0.104103	0.461967	0	0	6	65
GO:0007094 mitotic spindle assembly checkpoint	3	0.104129	0.223	0.13	Biological Process	GO:0007094	mitotic spindle assembly checkpoint	0.104129	0.461967	0	0	3	23
GO:0031577 spindle checkpoint	3	0.104129	0.223	0.13	Biological Process	GO:0031577	spindle checkpoint	0.104129	0.461967	0	0	3	23
GO:0045841 negative regulation of mitotic metaphase/anaphase transition	3	0.104129	0.223	0.13	Biological Process	GO:0045841	negative regulation of mitotic metaphase/anaphase transition	0.104129	0.461967	0	0	3	23
GO:0046417 chorismate metabolic process	3	0.104129	0.223	0.13	Biological Process	GO:0046417	chorismate metabolic process	0.104129	0.461967	0	0	3	23
GO:0046847 filopodium assembly	3	0.104129	0.223	0.13	Biological Process	GO:0046847	filopodium assembly	0.104129	0.461967	0	0	3	23
GO:0051436 negative regulation of ubiquitin-protein ligase activity involved in mitotic cell cycle	3	0.104129	0.223	0.13	Biological Process	GO:0051436	negative regulation of ubiquitin-protein ligase activity involved in mitotic cell cycle	0.104129	0.461967	0	0	3	23
GO:0051439 regulation of ubiquitin-protein ligase activity involved in mitotic cell cycle	3	0.104129	0.223	0.13	Biological Process	GO:0051439	regulation of ubiquitin-protein ligase activity involved in mitotic cell cycle	0.104129	0.461967	0	0	3	23
GO:0071173 spindle assembly checkpoint	3	0.104129	0.223	0.13	Biological Process	GO:0071173	spindle assembly checkpoint	0.104129	0.461967	0	0	3	23
GO:0071174 mitotic spindle checkpoint	3	0.104129	0.223	0.13	Biological Process	GO:0071174	mitotic spindle checkpoint	0.104129	0.461967	0	0	3	23
GO:1902100 negative regulation of metaphase/anaphase transition of cell cycle	3	0.104129	0.223	0.13	Biological Process	GO:1902100	negative regulation of metaphase/anaphase transition of cell cycle	0.104129	0.461967	0	0	3	23
GO:2000816 negative regulation of mitotic sister chromatid separation	3	0.104129	0.223	0.13	Biological Process	GO:2000816	negative regulation of mitotic sister chromatid separation	0.104129	0.461967	0	0	3	23
GO:1901564 organonitrogen compound metabolic process	499	0.105263	37.045	0.052	Biological Process	GO:1901564	organonitrogen compound metabolic process	0.105263	0.466425	0	0	499	9580
GO:1903313 positive regulation of mRNA metabolic process	8	0.105671	0.594	0.083	Biological Process	GO:1903313	positive regulation of mRNA metabolic process	0.105671	0.467654	0	0	8	96
GO:0004872 receptor activity	35	0.106636	2.798	0.062	Molecular Function	GO:0004872	receptor activity	0.106636	0.363513	0	0	35	567
GO:0005249 voltage-gated potassium channel activity	5	0.106859	0.4	0.098	Molecular Function	GO:0005249	voltage-gated potassium channel activity	0.106859	0.363513	0	0	5	51
GO:0031667 response to nutrient levels	33	0.107403	2.45	0.062	Biological Process	GO:0031667	response to nutrient levels	0.107403	0.474736	0	0	33	528
GO:0006635 fatty acid beta-oxidation	7	0.108514	0.52	0.086	Biological Process	GO:0006635	fatty acid beta-oxidation	0.108514	0.47747	0	0	7	81
GO:0008037 cell recognition	7	0.108514	0.52	0.086	Biological Process	GO:0008037	cell recognition	0.108514	0.47747	0	0	7	81
GO:0031327 negative regulation of cellular biosynthetic process	61	0.108703	4.529	0.058	Biological Process	GO:0031327	negative regulation of cellular biosynthetic process	0.108703	0.47747	0	0	61	1043
GO:0004709 MAP kinase kinase kinase activity	4	0.108806	0.32	0.108	Molecular Function	GO:0004709	MAP kinase kinase kinase activity	0.108806	0.369037	0	0	4	37
GO:0006874 cellular calcium ion homeostasis	5	0.108817	0.371	0.098	Biological Process	GO:0006874	cellular calcium ion homeostasis	0.108817	0.47747	0	0	5	51
GO:0009147 pyrimidine nucleoside triphosphate metabolic process	5	0.108817	0.371	0.098	Biological Process	GO:0009147	pyrimidine nucleoside triphosphate metabolic process	0.108817	0.47747	0	0	5	51
GO:0046688 response to copper ion	5	0.108817	0.371	0.098	Biological Process	GO:0046688	response to copper ion	0.108817	0.47747	0	0	5	51
GO:0048582 positive regulation of post-embryonic development	16	0.109139	1.188	0.07	Biological Process	GO:0048582	positive regulation of post-embryonic development	0.109139	0.478295	0	0	16	229
GO:0004871 signal transducer activity	42	0.110038	3.357	0.06	Molecular Function	GO:0004871	signal transducer activity	0.110038	0.37211	0	0	42	697
GO:0006511 ubiquitin-dependent protein catabolic process	56	0.110052	4.157	0.059	Biological Process	GO:0006511	ubiquitin-dependent protein catabolic process	0.110052	0.48171	0	0	56	951
GO:0000186 activation of MAPKK activity	4	0.110523	0.297	0.108	Biological Process	GO:0000186	activation of MAPKK activity	0.110523	0.482016	0	0	4	37
GO:0033119 negative regulation of RNA splicing	4	0.110523	0.297	0.108	Biological Process	GO:0033119	negative regulation of RNA splicing	0.110523	0.482016	0	0	4	37
GO:0048025 negative regulation of mRNA splicing, via spliceosome	4	0.110523	0.297	0.108	Biological Process	GO:0048025	negative regulation of mRNA splicing, via spliceosome	0.110523	0.482016	0	0	4	37
GO:0042277 peptide binding	10	0.111214	0.799	0.077	Molecular Function	GO:0042277	peptide binding	0.111214	0.374979	0	0	10	130
GO:0016684 oxidoreductase activity, acting on peroxide as acceptor	14	0.111836	1.119	0.071	Molecular Function	GO:0016684	oxidoreductase activity, acting on peroxide as acceptor	0.111836	0.375966	0	0	14	197
GO:0034045 pre-autophagosomal structure membrane	4	0.112644	0.308	0.105	Cellular Component	GO:0034045	pre-autophagosomal structure membrane	0.112644	0.425958	0	0	4	38
GO:0016844 strictosidine synthase activity	3	0.113351	0.24	0.125	Molecular Function	GO:0016844	strictosidine synthase activity	0.113351	0.376668	0	0	3	24
GO:0052381 tRNA dimethylallyltransferase activity	3	0.113351	0.24	0.125	Molecular Function	GO:0052381	tRNA dimethylallyltransferase activity	0.113351	0.376668	0	0	3	24
GO:0005515 protein binding	255	0.113553	20.384	0.053	Molecular Function	GO:0005515	protein binding	0.113553	0.376668	0	0	255	4809
GO:0042406 extrinsic component of endoplasmic reticulum membrane	2	0.113632	0.154	0.167	Cellular Component	GO:0042406	extrinsic component of endoplasmic reticulum membrane	0.113632	0.426866	0	0	2	12
GO:0034595 phosphatidylinositol phosphate 5-phosphatase activity	5	0.113692	0.4	0.096	Molecular Function	GO:0034595	phosphatidylinositol phosphate 5-phosphatase activity	0.113692	0.376668	0	0	5	52
GO:0046910 pectinesterase inhibitor activity	5	0.113692	0.4	0.096	Molecular Function	GO:0046910	pectinesterase inhibitor activity	0.113692	0.376668	0	0	5	52
GO:0006378 mRNA polyadenylation	7	0.113854	0.52	0.085	Biological Process	GO:0006378	mRNA polyadenylation	0.113854	0.494139	0	0	7	82
GO:0010632 regulation of epithelial cell migration	3	0.114814	0.223	0.125	Biological Process	GO:0010632	regulation of epithelial cell migration	0.114814	0.494139	0	0	3	24
GO:0030335 positive regulation of cell migration	3	0.114814	0.223	0.125	Biological Process	GO:0030335	positive regulation of cell migration	0.114814	0.494139	0	0	3	24
GO:0030336 negative regulation of cell migration	3	0.114814	0.223	0.125	Biological Process	GO:0030336	negative regulation of cell migration	0.114814	0.494139	0	0	3	24
GO:0040013 negative regulation of locomotion	3	0.114814	0.223	0.125	Biological Process	GO:0040013	negative regulation of locomotion	0.114814	0.494139	0	0	3	24
GO:0043280 positive regulation of cysteine-type endopeptidase activity involved in apoptotic process	3	0.114814	0.223	0.125	Biological Process	GO:0043280	positive regulation of cysteine-type endopeptidase activity involved in apoptotic process	0.114814	0.494139	0	0	3	24
GO:0048759 xylem vessel member cell differentiation	3	0.114814	0.223	0.125	Biological Process	GO:0048759	xylem vessel member cell differentiation	0.114814	0.494139	0	0	3	24
GO:0051271 negative regulation of cellular component movement	3	0.114814	0.223	0.125	Biological Process	GO:0051271	negative regulation of cellular component movement	0.114814	0.494139	0	0	3	24
GO:2000146 negative regulation of cell motility	3	0.114814	0.223	0.125	Biological Process	GO:2000146	negative regulation of cell motility	0.114814	0.494139	0	0	3	24
GO:2000147 positive regulation of cell motility	3	0.114814	0.223	0.125	Biological Process	GO:2000147	positive regulation of cell motility	0.114814	0.494139	0	0	3	24
GO:2001056 positive regulation of cysteine-type endopeptidase activity	3	0.114814	0.223	0.125	Biological Process	GO:2001056	positive regulation of cysteine-type endopeptidase activity	0.114814	0.494139	0	0	3	24
GO:0006664 glycolipid metabolic process	9	0.115319	0.668	0.079	Biological Process	GO:0006664	glycolipid metabolic process	0.115319	0.494539	0	0	9	114
GO:0090087 regulation of peptide transport	9	0.115319	0.668	0.079	Biological Process	GO:0090087	regulation of peptide transport	0.115319	0.494539	0	0	9	114
GO:0090329 regulation of DNA-dependent DNA replication	9	0.115319	0.668	0.079	Biological Process	GO:0090329	regulation of DNA-dependent DNA replication	0.115319	0.494539	0	0	9	114
GO:0006829 zinc II ion transport	5	0.115751	0.371	0.096	Biological Process	GO:0006829	zinc II ion transport	0.115751	0.4958	0	0	5	52
GO:0009707 chloroplast outer membrane	10	0.115909	0.77	0.075	Cellular Component	GO:0009707	chloroplast outer membrane	0.115909	0.430076	0	0	10	133
GO:0071345 cellular response to cytokine stimulus	6	0.116015	0.445	0.09	Biological Process	GO:0071345	cellular response to cytokine stimulus	0.116015	0.496338	0	0	6	67
GO:1901681 sulfur compound binding	7	0.116732	0.56	0.084	Molecular Function	GO:1901681	sulfur compound binding	0.116732	0.385621	0	0	7	83
GO:0005618 cell wall	61	0.116746	4.696	0.057	Cellular Component	GO:0005618	cell wall	0.116746	0.430076	0	0	61	1070
GO:0030312 external encapsulating structure	61	0.116746	4.696	0.057	Cellular Component	GO:0030312	external encapsulating structure	0.116746	0.430076	0	0	61	1070
GO:0006116 NADH oxidation	2	0.117524	0.148	0.167	Biological Process	GO:0006116	NADH oxidation	0.117524	0.498646	0	0	2	12
GO:0045730 respiratory burst	2	0.117524	0.148	0.167	Biological Process	GO:0045730	respiratory burst	0.117524	0.498646	0	0	2	12
GO:0048457 floral whorl morphogenesis	2	0.117524	0.148	0.167	Biological Process	GO:0048457	floral whorl morphogenesis	0.117524	0.498646	0	0	2	12
GO:0050770 regulation of axonogenesis	2	0.117524	0.148	0.167	Biological Process	GO:0050770	regulation of axonogenesis	0.117524	0.498646	0	0	2	12
GO:0060964 regulation of gene silencing by miRNA	2	0.117524	0.148	0.167	Biological Process	GO:0060964	regulation of gene silencing by miRNA	0.117524	0.498646	0	0	2	12
GO:0061687 detoxification of inorganic compound	2	0.117524	0.148	0.167	Biological Process	GO:0061687	detoxification of inorganic compound	0.117524	0.498646	0	0	2	12
GO:0090065 regulation of production of siRNA involved in RNA interference	2	0.117524	0.148	0.167	Biological Process	GO:0090065	regulation of production of siRNA involved in RNA interference	0.117524	0.498646	0	0	2	12
GO:0051247 positive regulation of protein metabolic process	29	0.117706	2.153	0.063	Biological Process	GO:0051247	positive regulation of protein metabolic process	0.117706	0.498828	0	0	29	461
GO:0004888 transmembrane signaling receptor activity	27	0.118563	2.158	0.063	Molecular Function	GO:0004888	transmembrane signaling receptor activity	0.118563	0.39054	0	0	27	428
GO:0006636 unsaturated fatty acid biosynthetic process	4	0.118935	0.297	0.105	Biological Process	GO:0006636	unsaturated fatty acid biosynthetic process	0.118935	0.502262	0	0	4	38
GO:0009641 shade avoidance	4	0.118935	0.297	0.105	Biological Process	GO:0009641	shade avoidance	0.118935	0.502262	0	0	4	38
GO:0019344 cysteine biosynthetic process	4	0.118935	0.297	0.105	Biological Process	GO:0019344	cysteine biosynthetic process	0.118935	0.502262	0	0	4	38
GO:0042592 homeostatic process	70	0.119201	5.197	0.057	Biological Process	GO:0042592	homeostatic process	0.119201	0.502794	0	0	70	1219
GO:0048767 root hair elongation	9	0.119928	0.668	0.078	Biological Process	GO:0048767	root hair elongation	0.119928	0.505271	0	0	9	115
GO:0005741 mitochondrial outer membrane	8	0.120387	0.616	0.079	Cellular Component	GO:0005741	mitochondrial outer membrane	0.120387	0.440647	0	0	8	101
GO:0070647 protein modification by small protein conjugation or removal	98	0.120662	7.275	0.056	Biological Process	GO:0070647	protein modification by small protein conjugation or removal	0.120662	0.50731	0	0	98	1750
GO:0046467 membrane lipid biosynthetic process	11	0.120694	0.817	0.074	Biological Process	GO:0046467	membrane lipid biosynthetic process	0.120694	0.50731	0	0	11	148
GO:0097305 response to alcohol	84	0.121648	6.236	0.057	Biological Process	GO:0097305	response to alcohol	0.121648	0.510722	0	0	84	1485
GO:0016671 oxidoreductase activity, acting on a sulfur group of donors, disulfide as acceptor	7	0.122246	0.56	0.083	Molecular Function	GO:0016671	oxidoreductase activity, acting on a sulfur group of donors, disulfide as acceptor	0.122246	0.401515	0	0	7	84
GO:0016308 1-phosphatidylinositol-4-phosphate 5-kinase activity	3	0.124312	0.24	0.12	Molecular Function	GO:0016308	1-phosphatidylinositol-4-phosphate 5-kinase activity	0.124312	0.405967	0	0	3	25
GO:0016717 oxidoreductase activity, acting on paired donors, with oxidation of a pair of donors resulting in the reduction of molecular oxygen to two molecules of water	3	0.124312	0.24	0.12	Molecular Function	GO:0016717	oxidoreductase activity, acting on paired donors, with oxidation of a pair of donors resulting in the reduction of molecular oxygen to two molecules of water	0.124312	0.405967	0	0	3	25
GO:0006073 cellular glucan metabolic process	27	0.124407	2.004	0.063	Biological Process	GO:0006073	cellular glucan metabolic process	0.124407	0.521697	0	0	27	428
GO:0051348 negative regulation of transferase activity	7	0.124939	0.52	0.083	Biological Process	GO:0051348	negative regulation of transferase activity	0.124939	0.523317	0	0	7	84
GO:0000820 regulation of glutamine family amino acid metabolic process	3	0.125891	0.223	0.12	Biological Process	GO:0000820	regulation of glutamine family amino acid metabolic process	0.125891	0.523648	0	0	3	25
GO:0006656 phosphatidylcholine biosynthetic process	3	0.125891	0.223	0.12	Biological Process	GO:0006656	phosphatidylcholine biosynthetic process	0.125891	0.523648	0	0	3	25
GO:0009089 lysine biosynthetic process via diaminopimelate	3	0.125891	0.223	0.12	Biological Process	GO:0009089	lysine biosynthetic process via diaminopimelate	0.125891	0.523648	0	0	3	25
GO:0043620 regulation of DNA-templated transcription in response to stress	3	0.125891	0.223	0.12	Biological Process	GO:0043620	regulation of DNA-templated transcription in response to stress	0.125891	0.523648	0	0	3	25
GO:0043627 response to estrogen	3	0.125891	0.223	0.12	Biological Process	GO:0043627	response to estrogen	0.125891	0.523648	0	0	3	25
GO:0046451 diaminopimelate metabolic process	3	0.125891	0.223	0.12	Biological Process	GO:0046451	diaminopimelate metabolic process	0.125891	0.523648	0	0	3	25
GO:0004180 carboxypeptidase activity	6	0.12607	0.48	0.087	Molecular Function	GO:0004180	carboxypeptidase activity	0.12607	0.410536	0	0	6	69
GO:0036477 somatodendritic compartment	6	0.126152	0.462	0.086	Cellular Component	GO:0036477	somatodendritic compartment	0.126152	0.458808	0	0	6	70
GO:0006275 regulation of DNA replication	13	0.12624	0.965	0.071	Biological Process	GO:0006275	regulation of DNA replication	0.12624	0.524494	0	0	13	183
GO:0038023 signaling receptor activity	33	0.12761	2.638	0.061	Molecular Function	GO:0038023	signaling receptor activity	0.12761	0.414369	0	0	33	541
GO:0007286 spermatid development	4	0.127613	0.297	0.103	Biological Process	GO:0007286	spermatid development	0.127613	0.526549	0	0	4	39
GO:0010216 maintenance of DNA methylation	4	0.127613	0.297	0.103	Biological Process	GO:0010216	maintenance of DNA methylation	0.127613	0.526549	0	0	4	39
GO:0015696 ammonium transport	4	0.127613	0.297	0.103	Biological Process	GO:0015696	ammonium transport	0.127613	0.526549	0	0	4	39
GO:0033047 regulation of mitotic sister chromatid segregation	4	0.127613	0.297	0.103	Biological Process	GO:0033047	regulation of mitotic sister chromatid segregation	0.127613	0.526549	0	0	4	39
GO:0035725 sodium ion transmembrane transport	4	0.127613	0.297	0.103	Biological Process	GO:0035725	sodium ion transmembrane transport	0.127613	0.526549	0	0	4	39
GO:0048515 spermatid differentiation	4	0.127613	0.297	0.103	Biological Process	GO:0048515	spermatid differentiation	0.127613	0.526549	0	0	4	39
GO:0048584 positive regulation of response to stimulus	48	0.128381	3.563	0.059	Biological Process	GO:0048584	positive regulation of response to stimulus	0.128381	0.52911	0	0	48	814
GO:0043632 modification-dependent macromolecule catabolic process	57	0.129081	4.232	0.058	Biological Process	GO:0043632	modification-dependent macromolecule catabolic process	0.129081	0.53139	0	0	57	982
GO:0008238 exopeptidase activity	11	0.129601	0.879	0.073	Molecular Function	GO:0008238	exopeptidase activity	0.129601	0.419643	0	0	11	151
GO:0032153 cell division site	5	0.129617	0.385	0.091	Cellular Component	GO:0032153	cell division site	0.129617	0.46819	0	0	5	55
GO:0006521 regulation of cellular amino acid metabolic process	5	0.130225	0.371	0.093	Biological Process	GO:0006521	regulation of cellular amino acid metabolic process	0.130225	0.53184	0	0	5	54
GO:0006625 protein targeting to peroxisome	5	0.130225	0.371	0.093	Biological Process	GO:0006625	protein targeting to peroxisome	0.130225	0.53184	0	0	5	54
GO:0007268 synaptic transmission	5	0.130225	0.371	0.093	Biological Process	GO:0007268	synaptic transmission	0.130225	0.53184	0	0	5	54
GO:0033238 regulation of cellular amine metabolic process	5	0.130225	0.371	0.093	Biological Process	GO:0033238	regulation of cellular amine metabolic process	0.130225	0.53184	0	0	5	54
GO:0055074 calcium ion homeostasis	5	0.130225	0.371	0.093	Biological Process	GO:0055074	calcium ion homeostasis	0.130225	0.53184	0	0	5	54
GO:0072662 protein localization to peroxisome	5	0.130225	0.371	0.093	Biological Process	GO:0072662	protein localization to peroxisome	0.130225	0.53184	0	0	5	54
GO:0072663 establishment of protein localization to peroxisome	5	0.130225	0.371	0.093	Biological Process	GO:0072663	establishment of protein localization to peroxisome	0.130225	0.53184	0	0	5	54
GO:0009062 fatty acid catabolic process	7	0.130679	0.52	0.082	Biological Process	GO:0009062	fatty acid catabolic process	0.130679	0.532503	0	0	7	85
GO:2000070 regulation of response to water deprivation	8	0.130696	0.594	0.079	Biological Process	GO:2000070	regulation of response to water deprivation	0.130696	0.532503	0	0	8	101
GO:0006970 response to osmotic stress	73	0.13106	5.419	0.057	Biological Process	GO:0006970	response to osmotic stress	0.13106	0.532503	0	0	73	1284
GO:0009932 cell tip growth	18	0.131981	1.336	0.066	Biological Process	GO:0009932	cell tip growth	0.131981	0.532503	0	0	18	271
GO:0005657 replication fork	7	0.132335	0.539	0.08	Cellular Component	GO:0005657	replication fork	0.132335	0.46819	0	0	7	87
GO:0048588 developmental cell growth	22	0.133068	1.633	0.064	Biological Process	GO:0048588	developmental cell growth	0.133068	0.532503	0	0	22	342
GO:0004356 glutamate-ammonia ligase activity	2	0.133233	0.16	0.154	Molecular Function	GO:0004356	glutamate-ammonia ligase activity	0.133233	0.422825	0	0	2	13
GO:0016211 ammonia ligase activity	2	0.133233	0.16	0.154	Molecular Function	GO:0016211	ammonia ligase activity	0.133233	0.422825	0	0	2	13
GO:0016880 acid-ammonia (or amide) ligase activity	2	0.133233	0.16	0.154	Molecular Function	GO:0016880	acid-ammonia (or amide) ligase activity	0.133233	0.422825	0	0	2	13
GO:0045131 pre-mRNA branch point binding	2	0.133233	0.16	0.154	Molecular Function	GO:0045131	pre-mRNA branch point binding	0.133233	0.422825	0	0	2	13
GO:0009527 plastid outer membrane	10	0.13325	0.77	0.073	Cellular Component	GO:0009527	plastid outer membrane	0.13325	0.46819	0	0	10	137
GO:0009890 negative regulation of biosynthetic process	61	0.134004	4.529	0.058	Biological Process	GO:0009890	negative regulation of biosynthetic process	0.134004	0.532503	0	0	61	1060
GO:0043487 regulation of RNA stability	9	0.134342	0.668	0.076	Biological Process	GO:0043487	regulation of RNA stability	0.134342	0.532503	0	0	9	118
GO:0006542 glutamine biosynthetic process	2	0.13449	0.148	0.154	Biological Process	GO:0006542	glutamine biosynthetic process	0.13449	0.532503	0	0	2	13
GO:0009595 detection of biotic stimulus	2	0.13449	0.148	0.154	Biological Process	GO:0009595	detection of biotic stimulus	0.13449	0.532503	0	0	2	13
GO:0016045 detection of bacterium	2	0.13449	0.148	0.154	Biological Process	GO:0016045	detection of bacterium	0.13449	0.532503	0	0	2	13
GO:0031279 regulation of cyclase activity	2	0.13449	0.148	0.154	Biological Process	GO:0031279	regulation of cyclase activity	0.13449	0.532503	0	0	2	13
GO:0046456 icosanoid biosynthetic process	2	0.13449	0.148	0.154	Biological Process	GO:0046456	icosanoid biosynthetic process	0.13449	0.532503	0	0	2	13
GO:0051512 positive regulation of unidimensional cell growth	2	0.13449	0.148	0.154	Biological Process	GO:0051512	positive regulation of unidimensional cell growth	0.13449	0.532503	0	0	2	13
GO:0098543 detection of other organism	2	0.13449	0.148	0.154	Biological Process	GO:0098543	detection of other organism	0.13449	0.532503	0	0	2	13
GO:0098581 detection of external biotic stimulus	2	0.13449	0.148	0.154	Biological Process	GO:0098581	detection of external biotic stimulus	0.13449	0.532503	0	0	2	13
GO:0005887 integral component of plasma membrane	24	0.134834	1.848	0.062	Cellular Component	GO:0005887	integral component of plasma membrane	0.134834	0.46819	0	0	24	386
GO:0016790 thiolester hydrolase activity	5	0.135391	0.4	0.091	Molecular Function	GO:0016790	thiolester hydrolase activity	0.135391	0.422825	0	0	5	55
GO:0022843 voltage-gated cation channel activity	5	0.135391	0.4	0.091	Molecular Function	GO:0022843	voltage-gated cation channel activity	0.135391	0.422825	0	0	5	55
GO:0015101 organic cation transmembrane transporter activity	3	0.135636	0.24	0.115	Molecular Function	GO:0015101	organic cation transmembrane transporter activity	0.135636	0.422825	0	0	3	26
GO:0043488 regulation of mRNA stability	8	0.136038	0.594	0.078	Biological Process	GO:0043488	regulation of mRNA stability	0.136038	0.532503	0	0	8	102
GO:0002791 regulation of peptide secretion	4	0.136547	0.297	0.1	Biological Process	GO:0002791	regulation of peptide secretion	0.136547	0.532503	0	0	4	40
GO:0034644 cellular response to UV	4	0.136547	0.297	0.1	Biological Process	GO:0034644	cellular response to UV	0.136547	0.532503	0	0	4	40
GO:0050708 regulation of protein secretion	4	0.136547	0.297	0.1	Biological Process	GO:0050708	regulation of protein secretion	0.136547	0.532503	0	0	4	40
GO:0090630 activation of GTPase activity	4	0.136547	0.297	0.1	Biological Process	GO:0090630	activation of GTPase activity	0.136547	0.532503	0	0	4	40
GO:0002274 myeloid leukocyte activation	3	0.137332	0.223	0.115	Biological Process	GO:0002274	myeloid leukocyte activation	0.137332	0.532503	0	0	3	26
GO:0010950 positive regulation of endopeptidase activity	3	0.137332	0.223	0.115	Biological Process	GO:0010950	positive regulation of endopeptidase activity	0.137332	0.532503	0	0	3	26
GO:0033048 negative regulation of mitotic sister chromatid segregation	3	0.137332	0.223	0.115	Biological Process	GO:0033048	negative regulation of mitotic sister chromatid segregation	0.137332	0.532503	0	0	3	26
GO:0043542 endothelial cell migration	3	0.137332	0.223	0.115	Biological Process	GO:0043542	endothelial cell migration	0.137332	0.532503	0	0	3	26
GO:0051352 negative regulation of ligase activity	3	0.137332	0.223	0.115	Biological Process	GO:0051352	negative regulation of ligase activity	0.137332	0.532503	0	0	3	26
GO:0051444 negative regulation of ubiquitin-protein transferase activity	3	0.137332	0.223	0.115	Biological Process	GO:0051444	negative regulation of ubiquitin-protein transferase activity	0.137332	0.532503	0	0	3	26
GO:1901348 positive regulation of secondary cell wall biogenesis	3	0.137332	0.223	0.115	Biological Process	GO:1901348	positive regulation of secondary cell wall biogenesis	0.137332	0.532503	0	0	3	26
GO:1903340 positive regulation of cell wall organization or biogenesis	3	0.137332	0.223	0.115	Biological Process	GO:1903340	positive regulation of cell wall organization or biogenesis	0.137332	0.532503	0	0	3	26
GO:1904667 negative regulation of ubiquitin protein ligase activity	3	0.137332	0.223	0.115	Biological Process	GO:1904667	negative regulation of ubiquitin protein ligase activity	0.137332	0.532503	0	0	3	26
GO:0016999 antibiotic metabolic process	20	0.137434	1.485	0.065	Biological Process	GO:0016999	antibiotic metabolic process	0.137434	0.532503	0	0	20	308
GO:0030307 positive regulation of cell growth	5	0.137755	0.371	0.091	Biological Process	GO:0030307	positive regulation of cell growth	0.137755	0.532503	0	0	5	55
GO:0030133 transport vesicle	10	0.13779	0.77	0.072	Cellular Component	GO:0030133	transport vesicle	0.13779	0.46819	0	0	10	138
GO:0065008 regulation of biological quality	151	0.137916	11.21	0.054	Biological Process	GO:0065008	regulation of biological quality	0.137916	0.532503	0	0	151	2784
GO:0044441 ciliary part	4	0.138308	0.308	0.098	Cellular Component	GO:0044441	ciliary part	0.138308	0.46819	0	0	4	41
GO:0009411 response to UV	16	0.138422	1.188	0.067	Biological Process	GO:0009411	response to UV	0.138422	0.532503	0	0	16	238
GO:0016830 carbon-carbon lyase activity	15	0.13881	1.199	0.068	Molecular Function	GO:0016830	carbon-carbon lyase activity	0.13881	0.422825	0	0	15	222
GO:0016776 phosphotransferase activity, phosphate group as acceptor	6	0.139059	0.48	0.085	Molecular Function	GO:0016776	phosphotransferase activity, phosphate group as acceptor	0.139059	0.422825	0	0	6	71
GO:0048586 regulation of long-day photoperiodism, flowering	9	0.139338	0.668	0.076	Biological Process	GO:0048586	regulation of long-day photoperiodism, flowering	0.139338	0.532503	0	0	9	119
GO:0031235 intrinsic component of the cytoplasmic side of the plasma membrane	1	0.139391	0.077	0.333	Cellular Component	GO:0031235	intrinsic component of the cytoplasmic side of the plasma membrane	0.139391	0.46819	0	0	1	3
GO:0033106 cis-Golgi network membrane	1	0.139391	0.077	0.333	Cellular Component	GO:0033106	cis-Golgi network membrane	0.139391	0.46819	0	0	1	3
GO:0033553 rDNA heterochromatin	1	0.139391	0.077	0.333	Cellular Component	GO:0033553	rDNA heterochromatin	0.139391	0.46819	0	0	1	3
GO:0043291 RAVE complex	1	0.139391	0.077	0.333	Cellular Component	GO:0043291	RAVE complex	0.139391	0.46819	0	0	1	3
GO:0043564 Ku70:Ku80 complex	1	0.139391	0.077	0.333	Cellular Component	GO:0043564	Ku70:Ku80 complex	0.139391	0.46819	0	0	1	3
GO:0044447 axoneme part	1	0.139391	0.077	0.333	Cellular Component	GO:0044447	axoneme part	0.139391	0.46819	0	0	1	3
GO:0045298 tubulin complex	1	0.139391	0.077	0.333	Cellular Component	GO:0045298	tubulin complex	0.139391	0.46819	0	0	1	3
GO:0044283 small molecule biosynthetic process	98	0.140168	7.275	0.055	Biological Process	GO:0044283	small molecule biosynthetic process	0.140168	0.532503	0	0	98	1766
GO:0031225 anchored component of membrane	23	0.140974	1.771	0.062	Cellular Component	GO:0031225	anchored component of membrane	0.140974	0.470737	0	0	23	370
GO:0000033 alpha-1,3-mannosyltransferase activity	1	0.141312	0.08	0.333	Molecular Function	GO:0000033	alpha-1,3-mannosyltransferase activity	0.141312	0.422825	0	0	1	3
GO:0000107 imidazoleglycerol-phosphate synthase activity	1	0.141312	0.08	0.333	Molecular Function	GO:0000107	imidazoleglycerol-phosphate synthase activity	0.141312	0.422825	0	0	1	3
GO:0000405 bubble DNA binding	1	0.141312	0.08	0.333	Molecular Function	GO:0000405	bubble DNA binding	0.141312	0.422825	0	0	1	3
GO:0003857 3-hydroxyacyl-CoA dehydrogenase activity	1	0.141312	0.08	0.333	Molecular Function	GO:0003857	3-hydroxyacyl-CoA dehydrogenase activity	0.141312	0.422825	0	0	1	3
GO:0003866 3-phosphoshikimate 1-carboxyvinyltransferase activity	1	0.141312	0.08	0.333	Molecular Function	GO:0003866	3-phosphoshikimate 1-carboxyvinyltransferase activity	0.141312	0.422825	0	0	1	3
GO:0004132 dCMP deaminase activity	1	0.141312	0.08	0.333	Molecular Function	GO:0004132	dCMP deaminase activity	0.141312	0.422825	0	0	1	3
GO:0004411 homogentisate 1,2-dioxygenase activity	1	0.141312	0.08	0.333	Molecular Function	GO:0004411	homogentisate 1,2-dioxygenase activity	0.141312	0.422825	0	0	1	3
GO:0004474 malate synthase activity	1	0.141312	0.08	0.333	Molecular Function	GO:0004474	malate synthase activity	0.141312	0.422825	0	0	1	3
GO:0004797 thymidine kinase activity	1	0.141312	0.08	0.333	Molecular Function	GO:0004797	thymidine kinase activity	0.141312	0.422825	0	0	1	3
GO:0004853 uroporphyrinogen decarboxylase activity	1	0.141312	0.08	0.333	Molecular Function	GO:0004853	uroporphyrinogen decarboxylase activity	0.141312	0.422825	0	0	1	3
GO:0005223 intracellular cGMP activated cation channel activity	1	0.141312	0.08	0.333	Molecular Function	GO:0005223	intracellular cGMP activated cation channel activity	0.141312	0.422825	0	0	1	3
GO:0008124 4-alpha-hydroxytetrahydrobiopterin dehydratase activity	1	0.141312	0.08	0.333	Molecular Function	GO:0008124	4-alpha-hydroxytetrahydrobiopterin dehydratase activity	0.141312	0.422825	0	0	1	3
GO:0010175 sphingosine transmembrane transporter activity	1	0.141312	0.08	0.333	Molecular Function	GO:0010175	sphingosine transmembrane transporter activity	0.141312	0.422825	0	0	1	3
GO:0015633 zinc transporting ATPase activity	1	0.141312	0.08	0.333	Molecular Function	GO:0015633	zinc transporting ATPase activity	0.141312	0.422825	0	0	1	3
GO:0017151 DEAD/H-box RNA helicase binding	1	0.141312	0.08	0.333	Molecular Function	GO:0017151	DEAD/H-box RNA helicase binding	0.141312	0.422825	0	0	1	3
GO:0030346 protein phosphatase 2B binding	1	0.141312	0.08	0.333	Molecular Function	GO:0030346	protein phosphatase 2B binding	0.141312	0.422825	0	0	1	3
GO:0046820 4-amino-4-deoxychorismate synthase activity	1	0.141312	0.08	0.333	Molecular Function	GO:0046820	4-amino-4-deoxychorismate synthase activity	0.141312	0.422825	0	0	1	3
GO:0047180 salutaridinol 7-O-acetyltransferase activity	1	0.141312	0.08	0.333	Molecular Function	GO:0047180	salutaridinol 7-O-acetyltransferase activity	0.141312	0.422825	0	0	1	3
GO:0050183 phosphatidylcholine 12-monooxygenase activity	1	0.141312	0.08	0.333	Molecular Function	GO:0050183	phosphatidylcholine 12-monooxygenase activity	0.141312	0.422825	0	0	1	3
GO:0051669 fructan beta-fructosidase activity	1	0.141312	0.08	0.333	Molecular Function	GO:0051669	fructan beta-fructosidase activity	0.141312	0.422825	0	0	1	3
GO:0000070 mitotic sister chromatid segregation	8	0.141489	0.594	0.078	Biological Process	GO:0000070	mitotic sister chromatid segregation	0.141489	0.532503	0	0	8	103
GO:0009690 cytokinin metabolic process	8	0.141489	0.594	0.078	Biological Process	GO:0009690	cytokinin metabolic process	0.141489	0.532503	0	0	8	103
GO:0048235 pollen sperm cell differentiation	6	0.141763	0.445	0.085	Biological Process	GO:0048235	pollen sperm cell differentiation	0.141763	0.532503	0	0	6	71
GO:0032880 regulation of protein localization	13	0.141784	0.965	0.07	Biological Process	GO:0032880	regulation of protein localization	0.141784	0.532503	0	0	13	187
GO:0007290 spermatid nucleus elongation	1	0.142079	0.074	0.333	Biological Process	GO:0007290	spermatid nucleus elongation	0.142079	0.532503	0	0	1	3
GO:0007297 ovarian follicle cell migration	1	0.142079	0.074	0.333	Biological Process	GO:0007297	ovarian follicle cell migration	0.142079	0.532503	0	0	1	3
GO:0007298 border follicle cell migration	1	0.142079	0.074	0.333	Biological Process	GO:0007298	border follicle cell migration	0.142079	0.532503	0	0	1	3
GO:0007316 pole plasm RNA localization	1	0.142079	0.074	0.333	Biological Process	GO:0007316	pole plasm RNA localization	0.142079	0.532503	0	0	1	3
GO:0008153 para-aminobenzoic acid biosynthetic process	1	0.142079	0.074	0.333	Biological Process	GO:0008153	para-aminobenzoic acid biosynthetic process	0.142079	0.532503	0	0	1	3
GO:0009120 deoxyribonucleoside metabolic process	1	0.142079	0.074	0.333	Biological Process	GO:0009120	deoxyribonucleoside metabolic process	0.142079	0.532503	0	0	1	3
GO:0009945 radial axis specification	1	0.142079	0.074	0.333	Biological Process	GO:0009945	radial axis specification	0.142079	0.532503	0	0	1	3
GO:0010835 regulation of protein ADP-ribosylation	1	0.142079	0.074	0.333	Biological Process	GO:0010835	regulation of protein ADP-ribosylation	0.142079	0.532503	0	0	1	3
GO:0010836 negative regulation of protein ADP-ribosylation	1	0.142079	0.074	0.333	Biological Process	GO:0010836	negative regulation of protein ADP-ribosylation	0.142079	0.532503	0	0	1	3
GO:0015847 putrescine transport	1	0.142079	0.074	0.333	Biological Process	GO:0015847	putrescine transport	0.142079	0.532503	0	0	1	3
GO:0019094 pole plasm mRNA localization	1	0.142079	0.074	0.333	Biological Process	GO:0019094	pole plasm mRNA localization	0.142079	0.532503	0	0	1	3
GO:0032607 interferon-alpha production	1	0.142079	0.074	0.333	Biological Process	GO:0032607	interferon-alpha production	0.142079	0.532503	0	0	1	3
GO:0032647 regulation of interferon-alpha production	1	0.142079	0.074	0.333	Biological Process	GO:0032647	regulation of interferon-alpha production	0.142079	0.532503	0	0	1	3
GO:0032727 positive regulation of interferon-alpha production	1	0.142079	0.074	0.333	Biological Process	GO:0032727	positive regulation of interferon-alpha production	0.142079	0.532503	0	0	1	3
GO:0035280 miRNA loading onto RISC involved in gene silencing by miRNA	1	0.142079	0.074	0.333	Biological Process	GO:0035280	miRNA loading onto RISC involved in gene silencing by miRNA	0.142079	0.532503	0	0	1	3
GO:0035518 histone H2A monoubiquitination	1	0.142079	0.074	0.333	Biological Process	GO:0035518	histone H2A monoubiquitination	0.142079	0.532503	0	0	1	3
GO:0043154 negative regulation of cysteine-type endopeptidase activity involved in apoptotic process	1	0.142079	0.074	0.333	Biological Process	GO:0043154	negative regulation of cysteine-type endopeptidase activity involved in apoptotic process	0.142079	0.532503	0	0	1	3
GO:0045004 DNA replication proofreading	1	0.142079	0.074	0.333	Biological Process	GO:0045004	DNA replication proofreading	0.142079	0.532503	0	0	1	3
GO:0045451 pole plasm oskar mRNA localization	1	0.142079	0.074	0.333	Biological Process	GO:0045451	pole plasm oskar mRNA localization	0.142079	0.532503	0	0	1	3
GO:0046104 thymidine metabolic process	1	0.142079	0.074	0.333	Biological Process	GO:0046104	thymidine metabolic process	0.142079	0.532503	0	0	1	3
GO:0046125 pyrimidine deoxyribonucleoside metabolic process	1	0.142079	0.074	0.333	Biological Process	GO:0046125	pyrimidine deoxyribonucleoside metabolic process	0.142079	0.532503	0	0	1	3
GO:0046293 formaldehyde biosynthetic process	1	0.142079	0.074	0.333	Biological Process	GO:0046293	formaldehyde biosynthetic process	0.142079	0.532503	0	0	1	3
GO:0046874 quinolinate metabolic process	1	0.142079	0.074	0.333	Biological Process	GO:0046874	quinolinate metabolic process	0.142079	0.532503	0	0	1	3
GO:0050715 positive regulation of cytokine secretion	1	0.142079	0.074	0.333	Biological Process	GO:0050715	positive regulation of cytokine secretion	0.142079	0.532503	0	0	1	3
GO:0051231 spindle elongation	1	0.142079	0.074	0.333	Biological Process	GO:0051231	spindle elongation	0.142079	0.532503	0	0	1	3
GO:0051573 negative regulation of histone H3-K9 methylation	1	0.142079	0.074	0.333	Biological Process	GO:0051573	negative regulation of histone H3-K9 methylation	0.142079	0.532503	0	0	1	3
GO:0055089 fatty acid homeostasis	1	0.142079	0.074	0.333	Biological Process	GO:0055089	fatty acid homeostasis	0.142079	0.532503	0	0	1	3
GO:0060051 negative regulation of protein glycosylation	1	0.142079	0.074	0.333	Biological Process	GO:0060051	negative regulation of protein glycosylation	0.142079	0.532503	0	0	1	3
GO:0060810 intracellular mRNA localization involved in pattern specification process	1	0.142079	0.074	0.333	Biological Process	GO:0060810	intracellular mRNA localization involved in pattern specification process	0.142079	0.532503	0	0	1	3
GO:0060811 intracellular mRNA localization involved in anterior/posterior axis specification	1	0.142079	0.074	0.333	Biological Process	GO:0060811	intracellular mRNA localization involved in anterior/posterior axis specification	0.142079	0.532503	0	0	1	3
GO:0070922 small RNA loading onto RISC	1	0.142079	0.074	0.333	Biological Process	GO:0070922	small RNA loading onto RISC	0.142079	0.532503	0	0	1	3
GO:0070966 nuclear-transcribed mRNA catabolic process, no-go decay	1	0.142079	0.074	0.333	Biological Process	GO:0070966	nuclear-transcribed mRNA catabolic process, no-go decay	0.142079	0.532503	0	0	1	3
GO:0072641 type I interferon secretion	1	0.142079	0.074	0.333	Biological Process	GO:0072641	type I interferon secretion	0.142079	0.532503	0	0	1	3
GO:0072642 interferon-alpha secretion	1	0.142079	0.074	0.333	Biological Process	GO:0072642	interferon-alpha secretion	0.142079	0.532503	0	0	1	3
GO:1902039 negative regulation of seed dormancy process	1	0.142079	0.074	0.333	Biological Process	GO:1902039	negative regulation of seed dormancy process	0.142079	0.532503	0	0	1	3
GO:1902739 regulation of interferon-alpha secretion	1	0.142079	0.074	0.333	Biological Process	GO:1902739	regulation of interferon-alpha secretion	0.142079	0.532503	0	0	1	3
GO:1902741 positive regulation of interferon-alpha secretion	1	0.142079	0.074	0.333	Biological Process	GO:1902741	positive regulation of interferon-alpha secretion	0.142079	0.532503	0	0	1	3
GO:1904353 regulation of telomere capping	1	0.142079	0.074	0.333	Biological Process	GO:1904353	regulation of telomere capping	0.142079	0.532503	0	0	1	3
GO:1990743 protein sialylation	1	0.142079	0.074	0.333	Biological Process	GO:1990743	protein sialylation	0.142079	0.532503	0	0	1	3
GO:0048699 generation of neurons	11	0.14208	0.817	0.072	Biological Process	GO:0048699	generation of neurons	0.14208	0.532503	0	0	11	153
GO:0003697 single-stranded DNA binding	10	0.14225	0.799	0.073	Molecular Function	GO:0003697	single-stranded DNA binding	0.14225	0.424522	0	0	10	137
GO:0006091 generation of precursor metabolites and energy	50	0.1424	3.712	0.058	Biological Process	GO:0006091	generation of precursor metabolites and energy	0.1424	0.533149	0	0	50	859
GO:0030016 myofibril	3	0.142823	0.231	0.111	Cellular Component	GO:0030016	myofibril	0.142823	0.4714	0	0	3	27
GO:0030017 sarcomere	3	0.142823	0.231	0.111	Cellular Component	GO:0030017	sarcomere	0.142823	0.4714	0	0	3	27
GO:0019684 photosynthesis, light reaction	15	0.143472	1.114	0.068	Biological Process	GO:0019684	photosynthesis, light reaction	0.143472	0.536604	0	0	15	222
GO:0010948 negative regulation of cell cycle process	9	0.144429	0.668	0.075	Biological Process	GO:0010948	negative regulation of cell cycle process	0.144429	0.538501	0	0	9	120
GO:0042752 regulation of circadian rhythm	9	0.144429	0.668	0.075	Biological Process	GO:0042752	regulation of circadian rhythm	0.144429	0.538501	0	0	9	120
GO:0051510 regulation of unidimensional cell growth	9	0.144429	0.668	0.075	Biological Process	GO:0051510	regulation of unidimensional cell growth	0.144429	0.538501	0	0	9	120
GO:1901700 response to oxygen-containing compound	187	0.144848	13.883	0.054	Biological Process	GO:1901700	response to oxygen-containing compound	0.144848	0.539506	0	0	187	3490
GO:0043574 peroxisomal transport	5	0.145472	0.371	0.089	Biological Process	GO:0043574	peroxisomal transport	0.145472	0.540972	0	0	5	56
GO:0006040 amino sugar metabolic process	4	0.145725	0.297	0.098	Biological Process	GO:0006040	amino sugar metabolic process	0.145725	0.540972	0	0	4	41
GO:2000116 regulation of cysteine-type endopeptidase activity	4	0.145725	0.297	0.098	Biological Process	GO:2000116	regulation of cysteine-type endopeptidase activity	0.145725	0.540972	0	0	4	41
GO:0000165 MAPK cascade	10	0.145993	0.742	0.073	Biological Process	GO:0000165	MAPK cascade	0.145993	0.540972	0	0	10	137
GO:0017001 antibiotic catabolic process	10	0.145993	0.742	0.073	Biological Process	GO:0017001	antibiotic catabolic process	0.145993	0.540972	0	0	10	137
GO:0006400 tRNA modification	11	0.146583	0.817	0.071	Biological Process	GO:0006400	tRNA modification	0.146583	0.541795	0	0	11	154
GO:0010208 pollen wall assembly	8	0.147046	0.594	0.077	Biological Process	GO:0010208	pollen wall assembly	0.147046	0.541795	0	0	8	104
GO:0034440 lipid oxidation	8	0.147046	0.594	0.077	Biological Process	GO:0034440	lipid oxidation	0.147046	0.541795	0	0	8	104
GO:0042538 hyperosmotic salinity response	8	0.147046	0.594	0.077	Biological Process	GO:0042538	hyperosmotic salinity response	0.147046	0.541795	0	0	8	104
GO:0085029 extracellular matrix assembly	8	0.147046	0.594	0.077	Biological Process	GO:0085029	extracellular matrix assembly	0.147046	0.541795	0	0	8	104
GO:0005652 nuclear lamina	2	0.147103	0.154	0.143	Cellular Component	GO:0005652	nuclear lamina	0.147103	0.482736	0	0	2	14
GO:0016051 carbohydrate biosynthetic process	41	0.147119	3.044	0.059	Biological Process	GO:0016051	carbohydrate biosynthetic process	0.147119	0.541795	0	0	41	694
GO:0043631 RNA polyadenylation	7	0.148664	0.52	0.08	Biological Process	GO:0043631	RNA polyadenylation	0.148664	0.546927	0	0	7	88
GO:0032507 maintenance of protein location in cell	3	0.149111	0.223	0.111	Biological Process	GO:0032507	maintenance of protein location in cell	0.149111	0.547191	0	0	3	27
GO:0045185 maintenance of protein location	3	0.149111	0.223	0.111	Biological Process	GO:0045185	maintenance of protein location	0.149111	0.547191	0	0	3	27
GO:0030162 regulation of proteolysis	19	0.149192	1.411	0.065	Biological Process	GO:0030162	regulation of proteolysis	0.149192	0.547191	0	0	19	294
GO:0051223 regulation of protein transport	9	0.149612	0.668	0.074	Biological Process	GO:0051223	regulation of protein transport	0.149612	0.547311	0	0	9	121
GO:0044042 glucan metabolic process	27	0.149708	2.004	0.062	Biological Process	GO:0044042	glucan metabolic process	0.149708	0.547311	0	0	27	438
GO:0044700 single organism signaling	210	0.149821	15.59	0.053	Biological Process	GO:0044700	single organism signaling	0.149821	0.547311	0	0	210	3944
GO:0071214 cellular response to abiotic stimulus	34	0.149834	2.524	0.06	Biological Process	GO:0071214	cellular response to abiotic stimulus	0.149834	0.547311	0	0	34	566
GO:1901565 organonitrogen compound catabolic process	79	0.150401	5.865	0.056	Biological Process	GO:1901565	organonitrogen compound catabolic process	0.150401	0.548826	0	0	79	1411
GO:0015245 fatty acid transporter activity	2	0.150561	0.16	0.143	Molecular Function	GO:0015245	fatty acid transporter activity	0.150561	0.442395	0	0	2	14
GO:0016161 beta-amylase activity	2	0.150561	0.16	0.143	Molecular Function	GO:0016161	beta-amylase activity	0.150561	0.442395	0	0	2	14
GO:0016801 hydrolase activity, acting on ether bonds	2	0.150561	0.16	0.143	Molecular Function	GO:0016801	hydrolase activity, acting on ether bonds	0.150561	0.442395	0	0	2	14
GO:0032947 protein complex scaffold	2	0.150561	0.16	0.143	Molecular Function	GO:0032947	protein complex scaffold	0.150561	0.442395	0	0	2	14
GO:0047720 indoleacetaldoxime dehydratase activity	2	0.150561	0.16	0.143	Molecular Function	GO:0047720	indoleacetaldoxime dehydratase activity	0.150561	0.442395	0	0	2	14
GO:0051731 polynucleotide 5'-hydroxyl-kinase activity	2	0.150561	0.16	0.143	Molecular Function	GO:0051731	polynucleotide 5'-hydroxyl-kinase activity	0.150561	0.442395	0	0	2	14
GO:0006336 DNA replication-independent nucleosome assembly	2	0.151954	0.148	0.143	Biological Process	GO:0006336	DNA replication-independent nucleosome assembly	0.151954	0.551141	0	0	2	14
GO:0007411 axon guidance	2	0.151954	0.148	0.143	Biological Process	GO:0007411	axon guidance	0.151954	0.551141	0	0	2	14
GO:0051775 response to redox state	2	0.151954	0.148	0.143	Biological Process	GO:0051775	response to redox state	0.151954	0.551141	0	0	2	14
GO:0097485 neuron projection guidance	2	0.151954	0.148	0.143	Biological Process	GO:0097485	neuron projection guidance	0.151954	0.551141	0	0	2	14
GO:1990138 neuron projection extension	2	0.151954	0.148	0.143	Biological Process	GO:1990138	neuron projection extension	0.151954	0.551141	0	0	2	14
GO:2001234 negative regulation of apoptotic signaling pathway	2	0.151954	0.148	0.143	Biological Process	GO:2001234	negative regulation of apoptotic signaling pathway	0.151954	0.551141	0	0	2	14
GO:0004713 protein tyrosine kinase activity	6	0.152642	0.48	0.082	Molecular Function	GO:0004713	protein tyrosine kinase activity	0.152642	0.446911	0	0	6	73
GO:0008235 metalloexopeptidase activity	4	0.15288	0.32	0.095	Molecular Function	GO:0008235	metalloexopeptidase activity	0.15288	0.446911	0	0	4	42
GO:0010558 negative regulation of macromolecule biosynthetic process	58	0.15318	4.306	0.057	Biological Process	GO:0010558	negative regulation of macromolecule biosynthetic process	0.15318	0.553481	0	0	58	1015
GO:0051301 cell division	58	0.15318	4.306	0.057	Biological Process	GO:0051301	cell division	0.15318	0.553481	0	0	58	1015
GO:0033554 cellular response to stress	120	0.153345	8.909	0.055	Biological Process	GO:0033554	cellular response to stress	0.153345	0.553481	0	0	120	2199
GO:0006022 aminoglycan metabolic process	5	0.153369	0.371	0.088	Biological Process	GO:0006022	aminoglycan metabolic process	0.153369	0.553481	0	0	5	57
GO:0010345 suberin biosynthetic process	5	0.153369	0.371	0.088	Biological Process	GO:0010345	suberin biosynthetic process	0.153369	0.553481	0	0	5	57
GO:0007165 signal transduction	207	0.154173	15.367	0.053	Biological Process	GO:0007165	signal transduction	0.154173	0.555825	0	0	207	3890
GO:0009574 preprophase band	3	0.154504	0.231	0.107	Cellular Component	GO:0009574	preprophase band	0.154504	0.50126	0	0	3	28
GO:0035327 transcriptionally active chromatin	3	0.154504	0.231	0.107	Cellular Component	GO:0035327	transcriptionally active chromatin	0.154504	0.50126	0	0	3	28
GO:0000272 polysaccharide catabolic process	18	0.155094	1.336	0.065	Biological Process	GO:0000272	polysaccharide catabolic process	0.155094	0.557417	0	0	18	278
GO:0017145 stem cell division	4	0.155135	0.297	0.095	Biological Process	GO:0017145	stem cell division	0.155135	0.557417	0	0	4	42
GO:0033045 regulation of sister chromatid segregation	4	0.155135	0.297	0.095	Biological Process	GO:0033045	regulation of sister chromatid segregation	0.155135	0.557417	0	0	4	42
GO:0010105 negative regulation of ethylene-activated signaling pathway	6	0.155544	0.445	0.082	Biological Process	GO:0010105	negative regulation of ethylene-activated signaling pathway	0.155544	0.557417	0	0	6	73
GO:0035265 organ growth	6	0.155544	0.445	0.082	Biological Process	GO:0035265	organ growth	0.155544	0.557417	0	0	6	73
GO:0070298 negative regulation of phosphorelay signal transduction system	6	0.155544	0.445	0.082	Biological Process	GO:0070298	negative regulation of phosphorelay signal transduction system	0.155544	0.557417	0	0	6	73
GO:0034754 cellular hormone metabolic process	10	0.155793	0.742	0.072	Biological Process	GO:0034754	cellular hormone metabolic process	0.155793	0.557756	0	0	10	139
GO:0008422 beta-glucosidase activity	10	0.156795	0.799	0.071	Molecular Function	GO:0008422	beta-glucosidase activity	0.156795	0.456159	0	0	10	140
GO:0004674 protein serine/threonine kinase activity	90	0.156842	7.194	0.055	Molecular Function	GO:0004674	protein serine/threonine kinase activity	0.156842	0.456159	0	0	90	1635
GO:0065004 protein-DNA complex assembly	13	0.158315	0.965	0.068	Biological Process	GO:0065004	protein-DNA complex assembly	0.158315	0.565698	0	0	13	191
GO:0023052 signaling	210	0.158326	15.59	0.053	Biological Process	GO:0023052	signaling	0.158326	0.565698	0	0	210	3953
GO:0016843 amine-lyase activity	3	0.159269	0.24	0.107	Molecular Function	GO:0016843	amine-lyase activity	0.159269	0.461937	0	0	3	28
GO:0017137 Rab GTPase binding	6	0.159646	0.48	0.081	Molecular Function	GO:0017137	Rab GTPase binding	0.159646	0.461937	0	0	6	74
GO:0031974 membrane-enclosed lumen	161	0.159817	12.394	0.053	Cellular Component	GO:0031974	membrane-enclosed lumen	0.159817	0.508006	0	0	161	3060
GO:0043233 organelle lumen	161	0.159817	12.394	0.053	Cellular Component	GO:0043233	organelle lumen	0.159817	0.508006	0	0	161	3060
GO:0070013 intracellular organelle lumen	161	0.159817	12.394	0.053	Cellular Component	GO:0070013	intracellular organelle lumen	0.159817	0.508006	0	0	161	3060
GO:0005976 polysaccharide metabolic process	47	0.159973	3.489	0.058	Biological Process	GO:0005976	polysaccharide metabolic process	0.159973	0.571014	0	0	47	812
GO:0016209 antioxidant activity	19	0.160134	1.519	0.064	Molecular Function	GO:0016209	antioxidant activity	0.160134	0.461937	0	0	19	299
GO:0005623 cell	1238	0.160142	95.304	0.049	Cellular Component	GO:0005623	cell	0.160142	0.508006	0	0	1238	25195
GO:0050662 coenzyme binding	47	0.160445	3.757	0.058	Molecular Function	GO:0050662	coenzyme binding	0.160445	0.461937	0	0	47	817
GO:0010077 maintenance of inflorescence meristem identity	3	0.161199	0.223	0.107	Biological Process	GO:0010077	maintenance of inflorescence meristem identity	0.161199	0.571097	0	0	3	28
GO:0010952 positive regulation of peptidase activity	3	0.161199	0.223	0.107	Biological Process	GO:0010952	positive regulation of peptidase activity	0.161199	0.571097	0	0	3	28
GO:0033046 negative regulation of sister chromatid segregation	3	0.161199	0.223	0.107	Biological Process	GO:0033046	negative regulation of sister chromatid segregation	0.161199	0.571097	0	0	3	28
GO:0034260 negative regulation of GTPase activity	3	0.161199	0.223	0.107	Biological Process	GO:0034260	negative regulation of GTPase activity	0.161199	0.571097	0	0	3	28
GO:0051147 regulation of muscle cell differentiation	3	0.161199	0.223	0.107	Biological Process	GO:0051147	regulation of muscle cell differentiation	0.161199	0.571097	0	0	3	28
GO:0051985 negative regulation of chromosome segregation	3	0.161199	0.223	0.107	Biological Process	GO:0051985	negative regulation of chromosome segregation	0.161199	0.571097	0	0	3	28
GO:2000114 regulation of establishment of cell polarity	3	0.161199	0.223	0.107	Biological Process	GO:2000114	regulation of establishment of cell polarity	0.161199	0.571097	0	0	3	28
GO:0019395 fatty acid oxidation	7	0.161266	0.52	0.078	Biological Process	GO:0019395	fatty acid oxidation	0.161266	0.571097	0	0	7	90
GO:0046839 phospholipid dephosphorylation	5	0.16144	0.371	0.086	Biological Process	GO:0046839	phospholipid dephosphorylation	0.16144	0.57115	0	0	5	58
GO:0009991 response to extracellular stimulus	37	0.162969	2.747	0.059	Biological Process	GO:0009991	response to extracellular stimulus	0.162969	0.574897	0	0	37	627
GO:0008219 cell death	42	0.162978	3.118	0.058	Biological Process	GO:0008219	cell death	0.162978	0.574897	0	0	42	720
GO:0016265 death	42	0.162978	3.118	0.058	Biological Process	GO:0016265	death	0.162978	0.574897	0	0	42	720
GO:0008134 transcription factor binding	18	0.163423	1.439	0.064	Molecular Function	GO:0008134	transcription factor binding	0.163423	0.469328	0	0	18	282
GO:0010604 positive regulation of macromolecule metabolic process	98	0.164389	7.275	0.055	Biological Process	GO:0010604	positive regulation of macromolecule metabolic process	0.164389	0.579307	0	0	98	1784
GO:0043628 ncRNA 3'-end processing	4	0.164765	0.297	0.093	Biological Process	GO:0043628	ncRNA 3'-end processing	0.164765	0.580063	0	0	4	43
GO:0019199 transmembrane receptor protein kinase activity	23	0.165249	1.839	0.062	Molecular Function	GO:0019199	transmembrane receptor protein kinase activity	0.165249	0.473383	0	0	23	373
GO:0019842 vitamin binding	20	0.166775	1.599	0.063	Molecular Function	GO:0019842	vitamin binding	0.166775	0.47498	0	0	20	319
GO:0043021 ribonucleoprotein complex binding	9	0.167284	0.719	0.072	Molecular Function	GO:0043021	ribonucleoprotein complex binding	0.167284	0.47498	0	0	9	125
GO:0019722 calcium-mediated signaling	7	0.167742	0.52	0.077	Biological Process	GO:0019722	calcium-mediated signaling	0.167742	0.588872	0	0	7	91
GO:1903829 positive regulation of cellular protein localization	7	0.167742	0.52	0.077	Biological Process	GO:1903829	positive regulation of cellular protein localization	0.167742	0.588872	0	0	7	91
GO:0007049 cell cycle	83	0.168214	6.162	0.055	Biological Process	GO:0007049	cell cycle	0.168214	0.588872	0	0	83	1499
GO:0007154 cell communication	233	0.168247	17.298	0.053	Biological Process	GO:0007154	cell communication	0.168247	0.588872	0	0	233	4414
GO:0004629 phospholipase C activity	2	0.1683	0.16	0.133	Molecular Function	GO:0004629	phospholipase C activity	0.1683	0.47498	0	0	2	15
GO:0004861 cyclin-dependent protein serine/threonine kinase inhibitor activity	2	0.1683	0.16	0.133	Molecular Function	GO:0004861	cyclin-dependent protein serine/threonine kinase inhibitor activity	0.1683	0.47498	0	0	2	15
GO:0043295 glutathione binding	2	0.1683	0.16	0.133	Molecular Function	GO:0043295	glutathione binding	0.1683	0.47498	0	0	2	15
GO:1900750 oligopeptide binding	2	0.1683	0.16	0.133	Molecular Function	GO:1900750	oligopeptide binding	0.1683	0.47498	0	0	2	15
GO:0033692 cellular polysaccharide biosynthetic process	24	0.168315	1.782	0.062	Biological Process	GO:0033692	cellular polysaccharide biosynthetic process	0.168315	0.588872	0	0	24	390
GO:0071804 cellular potassium ion transport	12	0.168749	0.891	0.068	Biological Process	GO:0071804	cellular potassium ion transport	0.168749	0.588872	0	0	12	176
GO:0071805 potassium ion transmembrane transport	12	0.168749	0.891	0.068	Biological Process	GO:0071805	potassium ion transmembrane transport	0.168749	0.588872	0	0	12	176
GO:0071900 regulation of protein serine/threonine kinase activity	12	0.168749	0.891	0.068	Biological Process	GO:0071900	regulation of protein serine/threonine kinase activity	0.168749	0.588872	0	0	12	176
GO:0005813 centrosome	7	0.168802	0.539	0.075	Cellular Component	GO:0005813	centrosome	0.168802	0.532519	0	0	7	93
GO:0008654 phospholipid biosynthetic process	19	0.16953	1.411	0.063	Biological Process	GO:0008654	phospholipid biosynthetic process	0.16953	0.588872	0	0	19	300
GO:0006379 mRNA cleavage	5	0.169677	0.371	0.085	Biological Process	GO:0006379	mRNA cleavage	0.169677	0.588872	0	0	5	59
GO:0015860 purine nucleoside transmembrane transport	2	0.169827	0.148	0.133	Biological Process	GO:0015860	purine nucleoside transmembrane transport	0.169827	0.588872	0	0	2	15
GO:0043618 regulation of transcription from RNA polymerase II promoter in response to stress	2	0.169827	0.148	0.133	Biological Process	GO:0043618	regulation of transcription from RNA polymerase II promoter in response to stress	0.169827	0.588872	0	0	2	15
GO:0070601 centromeric sister chromatid cohesion	2	0.169827	0.148	0.133	Biological Process	GO:0070601	centromeric sister chromatid cohesion	0.169827	0.588872	0	0	2	15
GO:0008156 negative regulation of DNA replication	6	0.169886	0.445	0.08	Biological Process	GO:0008156	negative regulation of DNA replication	0.169886	0.588872	0	0	6	75
GO:0018108 peptidyl-tyrosine phosphorylation	6	0.169886	0.445	0.08	Biological Process	GO:0018108	peptidyl-tyrosine phosphorylation	0.169886	0.588872	0	0	6	75
GO:0018212 peptidyl-tyrosine modification	6	0.169886	0.445	0.08	Biological Process	GO:0018212	peptidyl-tyrosine modification	0.169886	0.588872	0	0	6	75
GO:0035266 meristem growth	10	0.171087	0.742	0.07	Biological Process	GO:0035266	meristem growth	0.171087	0.591896	0	0	10	142
GO:0060627 regulation of vesicle-mediated transport	10	0.171087	0.742	0.07	Biological Process	GO:0060627	regulation of vesicle-mediated transport	0.171087	0.591896	0	0	10	142
GO:0004707 MAP kinase activity	3	0.171524	0.24	0.103	Molecular Function	GO:0004707	MAP kinase activity	0.171524	0.482887	0	0	3	29
GO:0032989 cellular component morphogenesis	65	0.17199	4.826	0.056	Biological Process	GO:0032989	cellular component morphogenesis	0.17199	0.594447	0	0	65	1158
GO:0000775 chromosome, centromeric region	11	0.173982	0.847	0.067	Cellular Component	GO:0000775	chromosome, centromeric region	0.173982	0.537999	0	0	11	163
GO:0000373 Group II intron splicing	4	0.174602	0.297	0.091	Biological Process	GO:0000373	Group II intron splicing	0.174602	0.600592	0	0	4	44
GO:0006469 negative regulation of protein kinase activity	4	0.174602	0.297	0.091	Biological Process	GO:0006469	negative regulation of protein kinase activity	0.174602	0.600592	0	0	4	44
GO:0007004 telomere maintenance via telomerase	4	0.174602	0.297	0.091	Biological Process	GO:0007004	telomere maintenance via telomerase	0.174602	0.600592	0	0	4	44
GO:0033673 negative regulation of kinase activity	4	0.174602	0.297	0.091	Biological Process	GO:0033673	negative regulation of kinase activity	0.174602	0.600592	0	0	4	44
GO:0035337 fatty-acyl-CoA metabolic process	4	0.174602	0.297	0.091	Biological Process	GO:0035337	fatty-acyl-CoA metabolic process	0.174602	0.600592	0	0	4	44
GO:0034593 phosphatidylinositol bisphosphate phosphatase activity	5	0.1752	0.4	0.083	Molecular Function	GO:0034593	phosphatidylinositol bisphosphate phosphatase activity	0.1752	0.490334	0	0	5	60
GO:0009056 catabolic process	173	0.175889	12.843	0.053	Biological Process	GO:0009056	catabolic process	0.175889	0.603386	0	0	173	3247
GO:0048511 rhythmic process	21	0.176184	1.559	0.062	Biological Process	GO:0048511	rhythmic process	0.176184	0.603386	0	0	21	338
GO:0000278 mitotic cell cycle	36	0.176468	2.673	0.059	Biological Process	GO:0000278	mitotic cell cycle	0.176468	0.603386	0	0	36	614
GO:0006955 immune response	53	0.176533	3.935	0.057	Biological Process	GO:0006955	immune response	0.176533	0.603386	0	0	53	933
GO:0019853 L-ascorbic acid biosynthetic process	5	0.178075	0.371	0.083	Biological Process	GO:0019853	L-ascorbic acid biosynthetic process	0.178075	0.603386	0	0	5	60
GO:0051537 2 iron, 2 sulfur cluster binding	9	0.178429	0.719	0.071	Molecular Function	GO:0051537	2 iron, 2 sulfur cluster binding	0.178429	0.490334	0	0	9	127
GO:0016860 intramolecular oxidoreductase activity	8	0.178654	0.639	0.073	Molecular Function	GO:0016860	intramolecular oxidoreductase activity	0.178654	0.490334	0	0	8	110
GO:0008194 UDP-glycosyltransferase activity	27	0.178921	2.158	0.06	Molecular Function	GO:0008194	UDP-glycosyltransferase activity	0.178921	0.490334	0	0	27	451
GO:0098662 inorganic cation transmembrane transport	41	0.18044	3.044	0.058	Biological Process	GO:0098662	inorganic cation transmembrane transport	0.18044	0.603386	0	0	41	709
GO:0045202 synapse	8	0.181184	0.616	0.071	Cellular Component	GO:0045202	synapse	0.181184	0.537999	0	0	8	112
GO:0000940 condensed chromosome outer kinetochore	1	0.181398	0.077	0.25	Cellular Component	GO:0000940	condensed chromosome outer kinetochore	0.181398	0.537999	0	0	1	4
GO:0000942 condensed nuclear chromosome outer kinetochore	1	0.181398	0.077	0.25	Cellular Component	GO:0000942	condensed nuclear chromosome outer kinetochore	0.181398	0.537999	0	0	1	4
GO:0005784 Sec61 translocon complex	1	0.181398	0.077	0.25	Cellular Component	GO:0005784	Sec61 translocon complex	0.181398	0.537999	0	0	1	4
GO:0031897 Tic complex	1	0.181398	0.077	0.25	Cellular Component	GO:0031897	Tic complex	0.181398	0.537999	0	0	1	4
GO:0034245 mitochondrial DNA-directed RNA polymerase complex	1	0.181398	0.077	0.25	Cellular Component	GO:0034245	mitochondrial DNA-directed RNA polymerase complex	0.181398	0.537999	0	0	1	4
GO:0051285 cell cortex of cell tip	1	0.181398	0.077	0.25	Cellular Component	GO:0051285	cell cortex of cell tip	0.181398	0.537999	0	0	1	4
GO:0071256 translocon complex	1	0.181398	0.077	0.25	Cellular Component	GO:0071256	translocon complex	0.181398	0.537999	0	0	1	4
GO:0097038 perinuclear endoplasmic reticulum	1	0.181398	0.077	0.25	Cellular Component	GO:0097038	perinuclear endoplasmic reticulum	0.181398	0.537999	0	0	1	4
GO:1990298 bub1-bub3 complex	1	0.181398	0.077	0.25	Cellular Component	GO:1990298	bub1-bub3 complex	0.181398	0.537999	0	0	1	4
GO:0044464 cell part	1236	0.181846	95.15	0.049	Cellular Component	GO:0044464	cell part	0.181846	0.537999	0	0	1236	25166
GO:0019239 deaminase activity	4	0.18206	0.32	0.089	Molecular Function	GO:0019239	deaminase activity	0.18206	0.490334	0	0	4	45
GO:1903827 regulation of cellular protein localization	9	0.18257	0.668	0.071	Biological Process	GO:1903827	regulation of cellular protein localization	0.18257	0.603386	0	0	9	127
GO:0045935 positive regulation of nucleobase-containing compound metabolic process	74	0.183278	5.494	0.055	Biological Process	GO:0045935	positive regulation of nucleobase-containing compound metabolic process	0.183278	0.603386	0	0	74	1336
GO:0007059 chromosome segregation	16	0.183619	1.188	0.064	Biological Process	GO:0007059	chromosome segregation	0.183619	0.603386	0	0	16	250
GO:0001968 fibronectin binding	1	0.183833	0.08	0.25	Molecular Function	GO:0001968	fibronectin binding	0.183833	0.490334	0	0	1	4
GO:0004107 chorismate synthase activity	1	0.183833	0.08	0.25	Molecular Function	GO:0004107	chorismate synthase activity	0.183833	0.490334	0	0	1	4
GO:0004303 estradiol 17-beta-dehydrogenase activity	1	0.183833	0.08	0.25	Molecular Function	GO:0004303	estradiol 17-beta-dehydrogenase activity	0.183833	0.490334	0	0	1	4
GO:0004473 malate dehydrogenase (decarboxylating) (NADP+) activity	1	0.183833	0.08	0.25	Molecular Function	GO:0004473	malate dehydrogenase (decarboxylating) (NADP+) activity	0.183833	0.490334	0	0	1	4
GO:0008442 3-hydroxyisobutyrate dehydrogenase activity	1	0.183833	0.08	0.25	Molecular Function	GO:0008442	3-hydroxyisobutyrate dehydrogenase activity	0.183833	0.490334	0	0	1	4
GO:0008948 oxaloacetate decarboxylase activity	1	0.183833	0.08	0.25	Molecular Function	GO:0008948	oxaloacetate decarboxylase activity	0.183833	0.490334	0	0	1	4
GO:0010307 acetylglutamate kinase regulator activity	1	0.183833	0.08	0.25	Molecular Function	GO:0010307	acetylglutamate kinase regulator activity	0.183833	0.490334	0	0	1	4
GO:0016906 sterol 3-beta-glucosyltransferase activity	1	0.183833	0.08	0.25	Molecular Function	GO:0016906	sterol 3-beta-glucosyltransferase activity	0.183833	0.490334	0	0	1	4
GO:0018454 acetoacetyl-CoA reductase activity	1	0.183833	0.08	0.25	Molecular Function	GO:0018454	acetoacetyl-CoA reductase activity	0.183833	0.490334	0	0	1	4
GO:0042288 MHC class I protein binding	1	0.183833	0.08	0.25	Molecular Function	GO:0042288	MHC class I protein binding	0.183833	0.490334	0	0	1	4
GO:0045703 ketoreductase activity	1	0.183833	0.08	0.25	Molecular Function	GO:0045703	ketoreductase activity	0.183833	0.490334	0	0	1	4
GO:0047012 sterol-4-alpha-carboxylate 3-dehydrogenase (decarboxylating) activity	1	0.183833	0.08	0.25	Molecular Function	GO:0047012	sterol-4-alpha-carboxylate 3-dehydrogenase (decarboxylating) activity	0.183833	0.490334	0	0	1	4
GO:0047501 (+)-neomenthol dehydrogenase activity	1	0.183833	0.08	0.25	Molecular Function	GO:0047501	(+)-neomenthol dehydrogenase activity	0.183833	0.490334	0	0	1	4
GO:0050404 zeatin O-beta-D-xylosyltransferase activity	1	0.183833	0.08	0.25	Molecular Function	GO:0050404	zeatin O-beta-D-xylosyltransferase activity	0.183833	0.490334	0	0	1	4
GO:0051507 beta-sitosterol UDP-glucosyltransferase activity	1	0.183833	0.08	0.25	Molecular Function	GO:0051507	beta-sitosterol UDP-glucosyltransferase activity	0.183833	0.490334	0	0	1	4
GO:0098518 polynucleotide phosphatase activity	1	0.183833	0.08	0.25	Molecular Function	GO:0098518	polynucleotide phosphatase activity	0.183833	0.490334	0	0	1	4
GO:0043161 proteasome-mediated ubiquitin-dependent protein catabolic process	39	0.183903	2.895	0.058	Biological Process	GO:0043161	proteasome-mediated ubiquitin-dependent protein catabolic process	0.183903	0.603386	0	0	39	673
GO:0019905 syntaxin binding	3	0.184036	0.24	0.1	Molecular Function	GO:0019905	syntaxin binding	0.184036	0.490334	0	0	3	30
GO:0048487 beta-tubulin binding	3	0.184036	0.24	0.1	Molecular Function	GO:0048487	beta-tubulin binding	0.184036	0.490334	0	0	3	30
GO:0048667 cell morphogenesis involved in neuron differentiation	4	0.184635	0.297	0.089	Biological Process	GO:0048667	cell morphogenesis involved in neuron differentiation	0.184635	0.603386	0	0	4	45
GO:1901371 regulation of leaf morphogenesis	4	0.184635	0.297	0.089	Biological Process	GO:1901371	regulation of leaf morphogenesis	0.184635	0.603386	0	0	4	45
GO:0000710 meiotic mismatch repair	1	0.184806	0.074	0.25	Biological Process	GO:0000710	meiotic mismatch repair	0.184806	0.603386	0	0	1	4
GO:0000821 regulation of arginine metabolic process	1	0.184806	0.074	0.25	Biological Process	GO:0000821	regulation of arginine metabolic process	0.184806	0.603386	0	0	1	4
GO:0006390 transcription from mitochondrial promoter	1	0.184806	0.074	0.25	Biological Process	GO:0006390	transcription from mitochondrial promoter	0.184806	0.603386	0	0	1	4
GO:0006671 phytosphingosine metabolic process	1	0.184806	0.074	0.25	Biological Process	GO:0006671	phytosphingosine metabolic process	0.184806	0.603386	0	0	1	4
GO:0006703 estrogen biosynthetic process	1	0.184806	0.074	0.25	Biological Process	GO:0006703	estrogen biosynthetic process	0.184806	0.603386	0	0	1	4
GO:0008210 estrogen metabolic process	1	0.184806	0.074	0.25	Biological Process	GO:0008210	estrogen metabolic process	0.184806	0.603386	0	0	1	4
GO:0009244 lipopolysaccharide core region biosynthetic process	1	0.184806	0.074	0.25	Biological Process	GO:0009244	lipopolysaccharide core region biosynthetic process	0.184806	0.603386	0	0	1	4
GO:0010083 regulation of vegetative meristem growth	1	0.184806	0.074	0.25	Biological Process	GO:0010083	regulation of vegetative meristem growth	0.184806	0.603386	0	0	1	4
GO:0010372 positive regulation of gibberellin biosynthetic process	1	0.184806	0.074	0.25	Biological Process	GO:0010372	positive regulation of gibberellin biosynthetic process	0.184806	0.603386	0	0	1	4
GO:0010441 guard cell development	1	0.184806	0.074	0.25	Biological Process	GO:0010441	guard cell development	0.184806	0.603386	0	0	1	4
GO:0010442 guard cell morphogenesis	1	0.184806	0.074	0.25	Biological Process	GO:0010442	guard cell morphogenesis	0.184806	0.603386	0	0	1	4
GO:0019083 viral transcription	1	0.184806	0.074	0.25	Biological Process	GO:0019083	viral transcription	0.184806	0.603386	0	0	1	4
GO:0031269 pseudopodium assembly	1	0.184806	0.074	0.25	Biological Process	GO:0031269	pseudopodium assembly	0.184806	0.603386	0	0	1	4
GO:0031272 regulation of pseudopodium assembly	1	0.184806	0.074	0.25	Biological Process	GO:0031272	regulation of pseudopodium assembly	0.184806	0.603386	0	0	1	4
GO:0032471 negative regulation of endoplasmic reticulum calcium ion concentration	1	0.184806	0.074	0.25	Biological Process	GO:0032471	negative regulation of endoplasmic reticulum calcium ion concentration	0.184806	0.603386	0	0	1	4
GO:0035584 calcium-mediated signaling using intracellular calcium source	1	0.184806	0.074	0.25	Biological Process	GO:0035584	calcium-mediated signaling using intracellular calcium source	0.184806	0.603386	0	0	1	4
GO:0036068 light-independent chlorophyll biosynthetic process	1	0.184806	0.074	0.25	Biological Process	GO:0036068	light-independent chlorophyll biosynthetic process	0.184806	0.603386	0	0	1	4
GO:0036292 DNA rewinding	1	0.184806	0.074	0.25	Biological Process	GO:0036292	DNA rewinding	0.184806	0.603386	0	0	1	4
GO:0042868 antisense RNA metabolic process	1	0.184806	0.074	0.25	Biological Process	GO:0042868	antisense RNA metabolic process	0.184806	0.603386	0	0	1	4
GO:0046208 spermine catabolic process	1	0.184806	0.074	0.25	Biological Process	GO:0046208	spermine catabolic process	0.184806	0.603386	0	0	1	4
GO:0046401 lipopolysaccharide core region metabolic process	1	0.184806	0.074	0.25	Biological Process	GO:0046401	lipopolysaccharide core region metabolic process	0.184806	0.603386	0	0	1	4
GO:0046580 negative regulation of Ras protein signal transduction	1	0.184806	0.074	0.25	Biological Process	GO:0046580	negative regulation of Ras protein signal transduction	0.184806	0.603386	0	0	1	4
GO:0046782 regulation of viral transcription	1	0.184806	0.074	0.25	Biological Process	GO:0046782	regulation of viral transcription	0.184806	0.603386	0	0	1	4
GO:0048838 release of seed from dormancy	1	0.184806	0.074	0.25	Biological Process	GO:0048838	release of seed from dormancy	0.184806	0.603386	0	0	1	4
GO:0050434 positive regulation of viral transcription	1	0.184806	0.074	0.25	Biological Process	GO:0050434	positive regulation of viral transcription	0.184806	0.603386	0	0	1	4
GO:0050663 cytokine secretion	1	0.184806	0.074	0.25	Biological Process	GO:0050663	cytokine secretion	0.184806	0.603386	0	0	1	4
GO:0050707 regulation of cytokine secretion	1	0.184806	0.074	0.25	Biological Process	GO:0050707	regulation of cytokine secretion	0.184806	0.603386	0	0	1	4
GO:0050795 regulation of behavior	1	0.184806	0.074	0.25	Biological Process	GO:0050795	regulation of behavior	0.184806	0.603386	0	0	1	4
GO:0051058 negative regulation of small GTPase mediated signal transduction	1	0.184806	0.074	0.25	Biological Process	GO:0051058	negative regulation of small GTPase mediated signal transduction	0.184806	0.603386	0	0	1	4
GO:0051561 positive regulation of mitochondrial calcium ion concentration	1	0.184806	0.074	0.25	Biological Process	GO:0051561	positive regulation of mitochondrial calcium ion concentration	0.184806	0.603386	0	0	1	4
GO:0051764 actin crosslink formation	1	0.184806	0.074	0.25	Biological Process	GO:0051764	actin crosslink formation	0.184806	0.603386	0	0	1	4
GO:0070481 nuclear-transcribed mRNA catabolic process, non-stop decay	1	0.184806	0.074	0.25	Biological Process	GO:0070481	nuclear-transcribed mRNA catabolic process, non-stop decay	0.184806	0.603386	0	0	1	4
GO:0070651 nonfunctional rRNA decay	1	0.184806	0.074	0.25	Biological Process	GO:0070651	nonfunctional rRNA decay	0.184806	0.603386	0	0	1	4
GO:0070973 protein localization to endoplasmic reticulum exit site	1	0.184806	0.074	0.25	Biological Process	GO:0070973	protein localization to endoplasmic reticulum exit site	0.184806	0.603386	0	0	1	4
GO:0090368 regulation of ornithine metabolic process	1	0.184806	0.074	0.25	Biological Process	GO:0090368	regulation of ornithine metabolic process	0.184806	0.603386	0	0	1	4
GO:0097438 exit from dormancy	1	0.184806	0.074	0.25	Biological Process	GO:0097438	exit from dormancy	0.184806	0.603386	0	0	1	4
GO:0098501 polynucleotide dephosphorylation	1	0.184806	0.074	0.25	Biological Process	GO:0098501	polynucleotide dephosphorylation	0.184806	0.603386	0	0	1	4
GO:1900079 regulation of arginine biosynthetic process	1	0.184806	0.074	0.25	Biological Process	GO:1900079	regulation of arginine biosynthetic process	0.184806	0.603386	0	0	1	4
GO:1901255 nucleotide-excision repair involved in interstrand cross-link repair	1	0.184806	0.074	0.25	Biological Process	GO:1901255	nucleotide-excision repair involved in interstrand cross-link repair	0.184806	0.603386	0	0	1	4
GO:1902001 fatty acid transmembrane transport	1	0.184806	0.074	0.25	Biological Process	GO:1902001	fatty acid transmembrane transport	0.184806	0.603386	0	0	1	4
GO:1904152 regulation of retrograde protein transport, ER to cytosol	1	0.184806	0.074	0.25	Biological Process	GO:1904152	regulation of retrograde protein transport, ER to cytosol	0.184806	0.603386	0	0	1	4
GO:1904154 positive regulation of retrograde protein transport, ER to cytosol	1	0.184806	0.074	0.25	Biological Process	GO:1904154	positive regulation of retrograde protein transport, ER to cytosol	0.184806	0.603386	0	0	1	4
GO:2000013 regulation of arginine biosynthetic process via ornithine	1	0.184806	0.074	0.25	Biological Process	GO:2000013	regulation of arginine biosynthetic process via ornithine	0.184806	0.603386	0	0	1	4
GO:2000692 negative regulation of seed maturation	1	0.184806	0.074	0.25	Biological Process	GO:2000692	negative regulation of seed maturation	0.184806	0.603386	0	0	1	4
GO:0001701 in utero embryonic development	3	0.186195	0.223	0.1	Biological Process	GO:0001701	in utero embryonic development	0.186195	0.605175	0	0	3	30
GO:0006012 galactose metabolic process	3	0.186195	0.223	0.1	Biological Process	GO:0006012	galactose metabolic process	0.186195	0.605175	0	0	3	30
GO:0045739 positive regulation of DNA repair	3	0.186195	0.223	0.1	Biological Process	GO:0045739	positive regulation of DNA repair	0.186195	0.605175	0	0	3	30
GO:0051761 sesquiterpene metabolic process	3	0.186195	0.223	0.1	Biological Process	GO:0051761	sesquiterpene metabolic process	0.186195	0.605175	0	0	3	30
GO:0051762 sesquiterpene biosynthetic process	3	0.186195	0.223	0.1	Biological Process	GO:0051762	sesquiterpene biosynthetic process	0.186195	0.605175	0	0	3	30
GO:0033764 steroid dehydrogenase activity, acting on the CH-OH group of donors, NAD or NADP as acceptor	2	0.186365	0.16	0.125	Molecular Function	GO:0033764	steroid dehydrogenase activity, acting on the CH-OH group of donors, NAD or NADP as acceptor	0.186365	0.495385	0	0	2	16
GO:0009414 response to water deprivation	46	0.18743	3.415	0.057	Biological Process	GO:0009414	response to water deprivation	0.18743	0.608322	0	0	46	806
GO:0000447 endonucleolytic cleavage in ITS1 to separate SSU-rRNA from 5.8S rRNA and LSU-rRNA from tricistronic rRNA transcript (SSU-rRNA, 5.8S rRNA, LSU-rRNA)	2	0.188024	0.148	0.125	Biological Process	GO:0000447	endonucleolytic cleavage in ITS1 to separate SSU-rRNA from 5.8S rRNA and LSU-rRNA from tricistronic rRNA transcript (SSU-rRNA, 5.8S rRNA, LSU-rRNA)	0.188024	0.608322	0	0	2	16
GO:0006446 regulation of translational initiation	2	0.188024	0.148	0.125	Biological Process	GO:0006446	regulation of translational initiation	0.188024	0.608322	0	0	2	16
GO:0009423 chorismate biosynthetic process	2	0.188024	0.148	0.125	Biological Process	GO:0009423	chorismate biosynthetic process	0.188024	0.608322	0	0	2	16
GO:2001235 positive regulation of apoptotic signaling pathway	2	0.188024	0.148	0.125	Biological Process	GO:2001235	positive regulation of apoptotic signaling pathway	0.188024	0.608322	0	0	2	16
GO:0000226 microtubule cytoskeleton organization	23	0.188178	1.707	0.061	Biological Process	GO:0000226	microtubule cytoskeleton organization	0.188178	0.608322	0	0	23	378
GO:0048666 neuron development	8	0.188768	0.594	0.072	Biological Process	GO:0048666	neuron development	0.188768	0.609683	0	0	8	111
GO:0009931 calcium-dependent protein serine/threonine kinase activity	6	0.188982	0.48	0.077	Molecular Function	GO:0009931	calcium-dependent protein serine/threonine kinase activity	0.188982	0.500014	0	0	6	78
GO:0010857 calcium-dependent protein kinase activity	6	0.188982	0.48	0.077	Molecular Function	GO:0010857	calcium-dependent protein kinase activity	0.188982	0.500014	0	0	6	78
GO:0009416 response to light stimulus	87	0.189352	6.459	0.055	Biological Process	GO:0009416	response to light stimulus	0.189352	0.611022	0	0	87	1589
GO:0015293 symporter activity	14	0.189618	1.119	0.065	Molecular Function	GO:0015293	symporter activity	0.189618	0.500539	0	0	14	217
GO:0009637 response to blue light	14	0.190699	1.039	0.065	Biological Process	GO:0009637	response to blue light	0.190699	0.614817	0	0	14	216
GO:0005778 peroxisomal membrane	9	0.190729	0.693	0.069	Cellular Component	GO:0005778	peroxisomal membrane	0.190729	0.554061	0	0	9	131
GO:0031903 microbody membrane	9	0.190729	0.693	0.069	Cellular Component	GO:0031903	microbody membrane	0.190729	0.554061	0	0	9	131
GO:0043292 contractile fiber	3	0.191156	0.231	0.097	Cellular Component	GO:0043292	contractile fiber	0.191156	0.554061	0	0	3	31
GO:0044449 contractile fiber part	3	0.191156	0.231	0.097	Cellular Component	GO:0044449	contractile fiber part	0.191156	0.554061	0	0	3	31
GO:0016881 acid-amino acid ligase activity	4	0.19217	0.32	0.087	Molecular Function	GO:0016881	acid-amino acid ligase activity	0.19217	0.502827	0	0	4	46
GO:0005048 signal sequence binding	5	0.192244	0.4	0.081	Molecular Function	GO:0005048	signal sequence binding	0.192244	0.502827	0	0	5	62
GO:0017022 myosin binding	5	0.192244	0.4	0.081	Molecular Function	GO:0017022	myosin binding	0.192244	0.502827	0	0	5	62
GO:0052866 phosphatidylinositol phosphate phosphatase activity	5	0.192244	0.4	0.081	Molecular Function	GO:0052866	phosphatidylinositol phosphate phosphatase activity	0.192244	0.502827	0	0	5	62
GO:0043410 positive regulation of MAPK cascade	6	0.192373	0.445	0.077	Biological Process	GO:0043410	positive regulation of MAPK cascade	0.192373	0.619659	0	0	6	78
GO:0051187 cofactor catabolic process	12	0.192599	0.891	0.066	Biological Process	GO:0051187	cofactor catabolic process	0.192599	0.619832	0	0	12	181
GO:0034399 nuclear periphery	8	0.193469	0.616	0.07	Cellular Component	GO:0034399	nuclear periphery	0.193469	0.557934	0	0	8	114
GO:0018958 phenol-containing compound metabolic process	9	0.194222	0.668	0.07	Biological Process	GO:0018958	phenol-containing compound metabolic process	0.194222	0.624497	0	0	9	129
GO:0043255 regulation of carbohydrate biosynthetic process	4	0.194849	0.297	0.087	Biological Process	GO:0043255	regulation of carbohydrate biosynthetic process	0.194849	0.625231	0	0	4	46
GO:0042623 ATPase activity, coupled	45	0.194867	3.597	0.057	Molecular Function	GO:0042623	ATPase activity, coupled	0.194867	0.508523	0	0	45	795
GO:0018298 protein-chromophore linkage	8	0.195104	0.594	0.071	Biological Process	GO:0018298	protein-chromophore linkage	0.195104	0.625231	0	0	8	112
GO:1902532 negative regulation of intracellular signal transduction	8	0.195104	0.594	0.071	Biological Process	GO:1902532	negative regulation of intracellular signal transduction	0.195104	0.625231	0	0	8	112
GO:0044456 synapse part	7	0.195298	0.539	0.072	Cellular Component	GO:0044456	synapse part	0.195298	0.558396	0	0	7	97
GO:0032875 regulation of DNA endoreduplication	5	0.195319	0.371	0.081	Biological Process	GO:0032875	regulation of DNA endoreduplication	0.195319	0.625231	0	0	5	62
GO:2000278 regulation of DNA biosynthetic process	5	0.195319	0.371	0.081	Biological Process	GO:2000278	regulation of DNA biosynthetic process	0.195319	0.625231	0	0	5	62
GO:0005849 mRNA cleavage factor complex	4	0.195585	0.308	0.085	Cellular Component	GO:0005849	mRNA cleavage factor complex	0.195585	0.558396	0	0	4	47
GO:0009415 response to water	46	0.196576	3.415	0.057	Biological Process	GO:0009415	response to water	0.196576	0.628692	0	0	46	810
GO:0016307 phosphatidylinositol phosphate kinase activity	3	0.196779	0.24	0.097	Molecular Function	GO:0016307	phosphatidylinositol phosphate kinase activity	0.196779	0.512342	0	0	3	31
GO:0060089 molecular transducer activity	36	0.198024	2.878	0.058	Molecular Function	GO:0060089	molecular transducer activity	0.198024	0.514412	0	0	36	626
GO:0016709 oxidoreductase activity, acting on paired donors, with incorporation or reduction of molecular oxygen, NAD(P)H as one donor, and incorporation of one atom of oxygen	15	0.198537	1.199	0.063	Molecular Function	GO:0016709	oxidoreductase activity, acting on paired donors, with incorporation or reduction of molecular oxygen, NAD(P)H as one donor, and incorporation of one atom of oxygen	0.198537	0.514575	0	0	15	237
GO:0001525 angiogenesis	3	0.19905	0.223	0.097	Biological Process	GO:0001525	angiogenesis	0.19905	0.630996	0	0	3	31
GO:0002097 tRNA wobble base modification	3	0.19905	0.223	0.097	Biological Process	GO:0002097	tRNA wobble base modification	0.19905	0.630996	0	0	3	31
GO:0006023 aminoglycan biosynthetic process	3	0.19905	0.223	0.097	Biological Process	GO:0006023	aminoglycan biosynthetic process	0.19905	0.630996	0	0	3	31
GO:0006024 glycosaminoglycan biosynthetic process	3	0.19905	0.223	0.097	Biological Process	GO:0006024	glycosaminoglycan biosynthetic process	0.19905	0.630996	0	0	3	31
GO:0009085 lysine biosynthetic process	3	0.19905	0.223	0.097	Biological Process	GO:0009085	lysine biosynthetic process	0.19905	0.630996	0	0	3	31
GO:0010030 positive regulation of seed germination	3	0.19905	0.223	0.097	Biological Process	GO:0010030	positive regulation of seed germination	0.19905	0.630996	0	0	3	31
GO:0052482 defense response by cell wall thickening	3	0.19905	0.223	0.097	Biological Process	GO:0052482	defense response by cell wall thickening	0.19905	0.630996	0	0	3	31
GO:0052544 defense response by callose deposition in cell wall	3	0.19905	0.223	0.097	Biological Process	GO:0052544	defense response by callose deposition in cell wall	0.19905	0.630996	0	0	3	31
GO:0060147 regulation of posttranscriptional gene silencing	3	0.19905	0.223	0.097	Biological Process	GO:0060147	regulation of posttranscriptional gene silencing	0.19905	0.630996	0	0	3	31
GO:0060966 regulation of gene silencing by RNA	3	0.19905	0.223	0.097	Biological Process	GO:0060966	regulation of gene silencing by RNA	0.19905	0.630996	0	0	3	31
GO:0051246 regulation of protein metabolic process	72	0.199954	5.345	0.055	Biological Process	GO:0051246	regulation of protein metabolic process	0.199954	0.633306	0	0	72	1307
GO:0016759 cellulose synthase activity	5	0.200978	0.4	0.079	Molecular Function	GO:0016759	cellulose synthase activity	0.200978	0.517592	0	0	5	63
GO:0016760 cellulose synthase (UDP-forming) activity	5	0.200978	0.4	0.079	Molecular Function	GO:0016760	cellulose synthase (UDP-forming) activity	0.200978	0.517592	0	0	5	63
GO:0051239 regulation of multicellular organismal process	91	0.202352	6.756	0.054	Biological Process	GO:0051239	regulation of multicellular organismal process	0.202352	0.640336	0	0	91	1674
GO:0008266 poly(U) RNA binding	4	0.20245	0.32	0.085	Molecular Function	GO:0008266	poly(U) RNA binding	0.20245	0.517592	0	0	4	47
GO:1901575 organic substance catabolic process	151	0.202937	11.21	0.053	Biological Process	GO:1901575	organic substance catabolic process	0.202937	0.641622	0	0	151	2840
GO:0051287 NAD binding	8	0.203798	0.639	0.07	Molecular Function	GO:0051287	NAD binding	0.203798	0.517592	0	0	8	114
GO:0019852 L-ascorbic acid metabolic process	5	0.204152	0.371	0.079	Biological Process	GO:0019852	L-ascorbic acid metabolic process	0.204152	0.644897	0	0	5	63
GO:0005351 sugar:proton symporter activity	6	0.204376	0.48	0.075	Molecular Function	GO:0005351	sugar:proton symporter activity	0.204376	0.517592	0	0	6	80
GO:0005355 glucose transmembrane transporter activity	6	0.204376	0.48	0.075	Molecular Function	GO:0005355	glucose transmembrane transporter activity	0.204376	0.517592	0	0	6	80
GO:0005402 cation:sugar symporter activity	6	0.204376	0.48	0.075	Molecular Function	GO:0005402	cation:sugar symporter activity	0.204376	0.517592	0	0	6	80
GO:0015149 hexose transmembrane transporter activity	6	0.204376	0.48	0.075	Molecular Function	GO:0015149	hexose transmembrane transporter activity	0.204376	0.517592	0	0	6	80
GO:0005536 glucose binding	2	0.204682	0.16	0.118	Molecular Function	GO:0005536	glucose binding	0.204682	0.517592	0	0	2	17
GO:0016812 hydrolase activity, acting on carbon-nitrogen (but not peptide) bonds, in cyclic amides	2	0.204682	0.16	0.118	Molecular Function	GO:0016812	hydrolase activity, acting on carbon-nitrogen (but not peptide) bonds, in cyclic amides	0.204682	0.517592	0	0	2	17
GO:0030291 protein serine/threonine kinase inhibitor activity	2	0.204682	0.16	0.118	Molecular Function	GO:0030291	protein serine/threonine kinase inhibitor activity	0.204682	0.517592	0	0	2	17
GO:0044444 cytoplasmic part	692	0.204933	53.272	0.05	Cellular Component	GO:0044444	cytoplasmic part	0.204933	0.582172	0	0	692	13872
GO:0045740 positive regulation of DNA replication	4	0.205233	0.297	0.085	Biological Process	GO:0045740	positive regulation of DNA replication	0.205233	0.645414	0	0	4	47
GO:0048826 cotyledon morphogenesis	4	0.205233	0.297	0.085	Biological Process	GO:0048826	cotyledon morphogenesis	0.205233	0.645414	0	0	4	47
GO:1900426 positive regulation of defense response to bacterium	4	0.205233	0.297	0.085	Biological Process	GO:1900426	positive regulation of defense response to bacterium	0.205233	0.645414	0	0	4	47
GO:0010089 xylem development	9	0.206183	0.668	0.069	Biological Process	GO:0010089	xylem development	0.206183	0.645414	0	0	9	131
GO:0006140 regulation of nucleotide metabolic process	2	0.206468	0.148	0.118	Biological Process	GO:0006140	regulation of nucleotide metabolic process	0.206468	0.645414	0	0	2	17
GO:0030808 regulation of nucleotide biosynthetic process	2	0.206468	0.148	0.118	Biological Process	GO:0030808	regulation of nucleotide biosynthetic process	0.206468	0.645414	0	0	2	17
GO:0048259 regulation of receptor-mediated endocytosis	2	0.206468	0.148	0.118	Biological Process	GO:0048259	regulation of receptor-mediated endocytosis	0.206468	0.645414	0	0	2	17
GO:0051095 regulation of helicase activity	2	0.206468	0.148	0.118	Biological Process	GO:0051095	regulation of helicase activity	0.206468	0.645414	0	0	2	17
GO:0051097 negative regulation of helicase activity	2	0.206468	0.148	0.118	Biological Process	GO:0051097	negative regulation of helicase activity	0.206468	0.645414	0	0	2	17
GO:1900371 regulation of purine nucleotide biosynthetic process	2	0.206468	0.148	0.118	Biological Process	GO:1900371	regulation of purine nucleotide biosynthetic process	0.206468	0.645414	0	0	2	17
GO:1900542 regulation of purine nucleotide metabolic process	2	0.206468	0.148	0.118	Biological Process	GO:1900542	regulation of purine nucleotide metabolic process	0.206468	0.645414	0	0	2	17
GO:1903426 regulation of reactive oxygen species biosynthetic process	2	0.206468	0.148	0.118	Biological Process	GO:1903426	regulation of reactive oxygen species biosynthetic process	0.206468	0.645414	0	0	2	17
GO:0035428 hexose transmembrane transport	6	0.207958	0.445	0.075	Biological Process	GO:0035428	hexose transmembrane transport	0.207958	0.648945	0	0	6	80
GO:1904659 glucose transmembrane transport	6	0.207958	0.445	0.075	Biological Process	GO:1904659	glucose transmembrane transport	0.207958	0.648945	0	0	6	80
GO:0005774 vacuolar membrane	58	0.209268	4.465	0.054	Cellular Component	GO:0005774	vacuolar membrane	0.209268	0.589542	0	0	58	1065
GO:0005856 cytoskeleton	51	0.209592	3.926	0.055	Cellular Component	GO:0005856	cytoskeleton	0.209592	0.589542	0	0	51	929
GO:0000993 RNA polymerase II core binding	3	0.209726	0.24	0.094	Molecular Function	GO:0000993	RNA polymerase II core binding	0.209726	0.525242	0	0	3	32
GO:0043175 RNA polymerase core enzyme binding	3	0.209726	0.24	0.094	Molecular Function	GO:0043175	RNA polymerase core enzyme binding	0.209726	0.525242	0	0	3	32
GO:0098869 cellular oxidant detoxification	19	0.210347	1.411	0.061	Biological Process	GO:0098869	cellular oxidant detoxification	0.210347	0.65583	0	0	19	311
GO:0098754 detoxification	21	0.211591	1.559	0.06	Biological Process	GO:0098754	detoxification	0.211591	0.656202	0	0	21	348
GO:0000212 meiotic spindle organization	3	0.212107	0.223	0.094	Biological Process	GO:0000212	meiotic spindle organization	0.212107	0.656202	0	0	3	32
GO:0007269 neurotransmitter secretion	3	0.212107	0.223	0.094	Biological Process	GO:0007269	neurotransmitter secretion	0.212107	0.656202	0	0	3	32
GO:0007409 axonogenesis	3	0.212107	0.223	0.094	Biological Process	GO:0007409	axonogenesis	0.212107	0.656202	0	0	3	32
GO:0010588 cotyledon vascular tissue pattern formation	3	0.212107	0.223	0.094	Biological Process	GO:0010588	cotyledon vascular tissue pattern formation	0.212107	0.656202	0	0	3	32
GO:0030261 chromosome condensation	3	0.212107	0.223	0.094	Biological Process	GO:0030261	chromosome condensation	0.212107	0.656202	0	0	3	32
GO:0032435 negative regulation of proteasomal ubiquitin-dependent protein catabolic process	3	0.212107	0.223	0.094	Biological Process	GO:0032435	negative regulation of proteasomal ubiquitin-dependent protein catabolic process	0.212107	0.656202	0	0	3	32
GO:0090354 regulation of auxin metabolic process	3	0.212107	0.223	0.094	Biological Process	GO:0090354	regulation of auxin metabolic process	0.212107	0.656202	0	0	3	32
GO:0099531 presynaptic process involved in synaptic transmission	3	0.212107	0.223	0.094	Biological Process	GO:0099531	presynaptic process involved in synaptic transmission	0.212107	0.656202	0	0	3	32
GO:0010927 cellular component assembly involved in morphogenesis	12	0.212724	0.891	0.065	Biological Process	GO:0010927	cellular component assembly involved in morphogenesis	0.212724	0.657543	0	0	12	185
GO:0009524 phragmoplast	13	0.212876	1.001	0.063	Cellular Component	GO:0009524	phragmoplast	0.212876	0.595845	0	0	13	207
GO:0001933 negative regulation of protein phosphorylation	5	0.213114	0.371	0.078	Biological Process	GO:0001933	negative regulation of protein phosphorylation	0.213114	0.657619	0	0	5	64
GO:0009937 regulation of gibberellic acid mediated signaling pathway	5	0.213114	0.371	0.078	Biological Process	GO:0009937	regulation of gibberellic acid mediated signaling pathway	0.213114	0.657619	0	0	5	64
GO:0006560 proline metabolic process	4	0.215773	0.297	0.083	Biological Process	GO:0006560	proline metabolic process	0.215773	0.659357	0	0	4	48
GO:0009638 phototropism	4	0.215773	0.297	0.083	Biological Process	GO:0009638	phototropism	0.215773	0.659357	0	0	4	48
GO:0006334 nucleosome assembly	6	0.215914	0.445	0.074	Biological Process	GO:0006334	nucleosome assembly	0.215914	0.659357	0	0	6	81
GO:0006935 chemotaxis	6	0.215914	0.445	0.074	Biological Process	GO:0006935	chemotaxis	0.215914	0.659357	0	0	6	81
GO:0034097 response to cytokine	6	0.215914	0.445	0.074	Biological Process	GO:0034097	response to cytokine	0.215914	0.659357	0	0	6	81
GO:0030173 integral component of Golgi membrane	3	0.216683	0.231	0.091	Cellular Component	GO:0030173	integral component of Golgi membrane	0.216683	0.599025	0	0	3	33
GO:0031228 intrinsic component of Golgi membrane	3	0.216683	0.231	0.091	Cellular Component	GO:0031228	intrinsic component of Golgi membrane	0.216683	0.599025	0	0	3	33
GO:0042325 regulation of phosphorylation	20	0.216809	1.485	0.06	Biological Process	GO:0042325	regulation of phosphorylation	0.216809	0.659357	0	0	20	331
GO:0022008 neurogenesis	11	0.216871	0.817	0.065	Biological Process	GO:0022008	neurogenesis	0.216871	0.659357	0	0	11	168
GO:0004004 ATP-dependent RNA helicase activity	11	0.217061	0.879	0.065	Molecular Function	GO:0004004	ATP-dependent RNA helicase activity	0.217061	0.525242	0	0	11	169
GO:0008186 RNA-dependent ATPase activity	11	0.217061	0.879	0.065	Molecular Function	GO:0008186	RNA-dependent ATPase activity	0.217061	0.525242	0	0	11	169
GO:0048589 developmental growth	57	0.218606	4.232	0.055	Biological Process	GO:0048589	developmental growth	0.218606	0.659357	0	0	57	1029
GO:0022627 cytosolic small ribosomal subunit	8	0.219023	0.616	0.068	Cellular Component	GO:0022627	cytosolic small ribosomal subunit	0.219023	0.599025	0	0	8	118
GO:0015077 monovalent inorganic cation transmembrane transporter activity	28	0.219893	2.238	0.058	Molecular Function	GO:0015077	monovalent inorganic cation transmembrane transporter activity	0.219893	0.525242	0	0	28	483
GO:2001057 reactive nitrogen species metabolic process	8	0.221285	0.594	0.069	Biological Process	GO:2001057	reactive nitrogen species metabolic process	0.221285	0.659357	0	0	8	116
GO:0005640 nuclear outer membrane	1	0.221356	0.077	0.2	Cellular Component	GO:0005640	nuclear outer membrane	0.221356	0.599025	0	0	1	5
GO:0010007 magnesium chelatase complex	1	0.221356	0.077	0.2	Cellular Component	GO:0010007	magnesium chelatase complex	0.221356	0.599025	0	0	1	5
GO:0031465 Cul4B-RING E3 ubiquitin ligase complex	1	0.221356	0.077	0.2	Cellular Component	GO:0031465	Cul4B-RING E3 ubiquitin ligase complex	0.221356	0.599025	0	0	1	5
GO:0070971 endoplasmic reticulum exit site	1	0.221356	0.077	0.2	Cellular Component	GO:0070971	endoplasmic reticulum exit site	0.221356	0.599025	0	0	1	5
GO:0003724 RNA helicase activity	11	0.222522	0.879	0.065	Molecular Function	GO:0003724	RNA helicase activity	0.222522	0.525242	0	0	11	170
GO:0030551 cyclic nucleotide binding	3	0.222854	0.24	0.091	Molecular Function	GO:0030551	cyclic nucleotide binding	0.222854	0.525242	0	0	3	33
GO:0030552 cAMP binding	3	0.222854	0.24	0.091	Molecular Function	GO:0030552	cAMP binding	0.222854	0.525242	0	0	3	33
GO:0030553 cGMP binding	3	0.222854	0.24	0.091	Molecular Function	GO:0030553	cGMP binding	0.222854	0.525242	0	0	3	33
GO:0004826 phenylalanine-tRNA ligase activity	2	0.223181	0.16	0.111	Molecular Function	GO:0004826	phenylalanine-tRNA ligase activity	0.223181	0.525242	0	0	2	18
GO:0050474 (S)-norcoclaurine synthase activity	2	0.223181	0.16	0.111	Molecular Function	GO:0050474	(S)-norcoclaurine synthase activity	0.223181	0.525242	0	0	2	18
GO:0051139 metal ion:proton antiporter activity	2	0.223181	0.16	0.111	Molecular Function	GO:0051139	metal ion:proton antiporter activity	0.223181	0.525242	0	0	2	18
GO:0060590 ATPase regulator activity	2	0.223181	0.16	0.111	Molecular Function	GO:0060590	ATPase regulator activity	0.223181	0.525242	0	0	2	18
GO:0004439 phosphatidylinositol-4,5-bisphosphate 5-phosphatase activity	4	0.223472	0.32	0.082	Molecular Function	GO:0004439	phosphatidylinositol-4,5-bisphosphate 5-phosphatase activity	0.223472	0.525242	0	0	4	49
GO:0008649 rRNA methyltransferase activity	4	0.223472	0.32	0.082	Molecular Function	GO:0008649	rRNA methyltransferase activity	0.223472	0.525242	0	0	4	49
GO:0004123 cystathionine gamma-lyase activity	1	0.22425	0.08	0.2	Molecular Function	GO:0004123	cystathionine gamma-lyase activity	0.22425	0.525242	0	0	1	5
GO:0004165 dodecenoyl-CoA delta-isomerase activity	1	0.22425	0.08	0.2	Molecular Function	GO:0004165	dodecenoyl-CoA delta-isomerase activity	0.22425	0.525242	0	0	1	5
GO:0004737 pyruvate decarboxylase activity	1	0.22425	0.08	0.2	Molecular Function	GO:0004737	pyruvate decarboxylase activity	0.22425	0.525242	0	0	1	5
GO:0005217 intracellular ligand-gated ion channel activity	1	0.22425	0.08	0.2	Molecular Function	GO:0005217	intracellular ligand-gated ion channel activity	0.22425	0.525242	0	0	1	5
GO:0005221 intracellular cyclic nucleotide activated cation channel activity	1	0.22425	0.08	0.2	Molecular Function	GO:0005221	intracellular cyclic nucleotide activated cation channel activity	0.22425	0.525242	0	0	1	5
GO:0008373 sialyltransferase activity	1	0.22425	0.08	0.2	Molecular Function	GO:0008373	sialyltransferase activity	0.22425	0.525242	0	0	1	5
GO:0009383 rRNA (cytosine-C5-)-methyltransferase activity	1	0.22425	0.08	0.2	Molecular Function	GO:0009383	rRNA (cytosine-C5-)-methyltransferase activity	0.22425	0.525242	0	0	1	5
GO:0016434 rRNA (cytosine) methyltransferase activity	1	0.22425	0.08	0.2	Molecular Function	GO:0016434	rRNA (cytosine) methyltransferase activity	0.22425	0.525242	0	0	1	5
GO:0016851 magnesium chelatase activity	1	0.22425	0.08	0.2	Molecular Function	GO:0016851	magnesium chelatase activity	0.22425	0.525242	0	0	1	5
GO:0019781 NEDD8 activating enzyme activity	1	0.22425	0.08	0.2	Molecular Function	GO:0019781	NEDD8 activating enzyme activity	0.22425	0.525242	0	0	1	5
GO:0035241 protein-arginine omega-N monomethyltransferase activity	1	0.22425	0.08	0.2	Molecular Function	GO:0035241	protein-arginine omega-N monomethyltransferase activity	0.22425	0.525242	0	0	1	5
GO:0036310 annealing helicase activity	1	0.22425	0.08	0.2	Molecular Function	GO:0036310	annealing helicase activity	0.22425	0.525242	0	0	1	5
GO:0043425 bHLH transcription factor binding	1	0.22425	0.08	0.2	Molecular Function	GO:0043425	bHLH transcription factor binding	0.22425	0.525242	0	0	1	5
GO:0043855 cyclic nucleotide-gated ion channel activity	1	0.22425	0.08	0.2	Molecular Function	GO:0043855	cyclic nucleotide-gated ion channel activity	0.22425	0.525242	0	0	1	5
GO:0051002 ligase activity, forming nitrogen-metal bonds	1	0.22425	0.08	0.2	Molecular Function	GO:0051002	ligase activity, forming nitrogen-metal bonds	0.22425	0.525242	0	0	1	5
GO:0051003 ligase activity, forming nitrogen-metal bonds, forming coordination complexes	1	0.22425	0.08	0.2	Molecular Function	GO:0051003	ligase activity, forming nitrogen-metal bonds, forming coordination complexes	0.22425	0.525242	0	0	1	5
GO:0051880 G-quadruplex DNA binding	1	0.22425	0.08	0.2	Molecular Function	GO:0051880	G-quadruplex DNA binding	0.22425	0.525242	0	0	1	5
GO:0052592 oxidoreductase activity, acting on CH or CH2 groups, with an iron-sulfur protein as acceptor	1	0.22425	0.08	0.2	Molecular Function	GO:0052592	oxidoreductase activity, acting on CH or CH2 groups, with an iron-sulfur protein as acceptor	0.22425	0.525242	0	0	1	5
GO:0070530 K63-linked polyubiquitin binding	1	0.22425	0.08	0.2	Molecular Function	GO:0070530	K63-linked polyubiquitin binding	0.22425	0.525242	0	0	1	5
GO:0080046 quercetin 4'-O-glucosyltransferase activity	1	0.22425	0.08	0.2	Molecular Function	GO:0080046	quercetin 4'-O-glucosyltransferase activity	0.22425	0.525242	0	0	1	5
GO:0097617 annealing activity	1	0.22425	0.08	0.2	Molecular Function	GO:0097617	annealing activity	0.22425	0.525242	0	0	1	5
GO:0010033 response to organic substance	226	0.224659	16.778	0.052	Biological Process	GO:0010033	response to organic substance	0.224659	0.659357	0	0	226	4330
GO:0002238 response to molecule of fungal origin	2	0.22509	0.148	0.111	Biological Process	GO:0002238	response to molecule of fungal origin	0.22509	0.659357	0	0	2	18
GO:0006432 phenylalanyl-tRNA aminoacylation	2	0.22509	0.148	0.111	Biological Process	GO:0006432	phenylalanyl-tRNA aminoacylation	0.22509	0.659357	0	0	2	18
GO:0006610 ribosomal protein import into nucleus	2	0.22509	0.148	0.111	Biological Process	GO:0006610	ribosomal protein import into nucleus	0.22509	0.659357	0	0	2	18
GO:0034311 diol metabolic process	2	0.22509	0.148	0.111	Biological Process	GO:0034311	diol metabolic process	0.22509	0.659357	0	0	2	18
GO:0034312 diol biosynthetic process	2	0.22509	0.148	0.111	Biological Process	GO:0034312	diol biosynthetic process	0.22509	0.659357	0	0	2	18
GO:0080110 sporopollenin biosynthetic process	2	0.22509	0.148	0.111	Biological Process	GO:0080110	sporopollenin biosynthetic process	0.22509	0.659357	0	0	2	18
GO:2000468 regulation of peroxidase activity	2	0.22509	0.148	0.111	Biological Process	GO:2000468	regulation of peroxidase activity	0.22509	0.659357	0	0	2	18
GO:0006553 lysine metabolic process	3	0.225343	0.223	0.091	Biological Process	GO:0006553	lysine metabolic process	0.225343	0.659357	0	0	3	33
GO:0010508 positive regulation of autophagy	3	0.225343	0.223	0.091	Biological Process	GO:0010508	positive regulation of autophagy	0.225343	0.659357	0	0	3	33
GO:0034341 response to interferon-gamma	3	0.225343	0.223	0.091	Biological Process	GO:0034341	response to interferon-gamma	0.225343	0.659357	0	0	3	33
GO:0071346 cellular response to interferon-gamma	3	0.225343	0.223	0.091	Biological Process	GO:0071346	cellular response to interferon-gamma	0.225343	0.659357	0	0	3	33
GO:1902883 negative regulation of response to oxidative stress	3	0.225343	0.223	0.091	Biological Process	GO:1902883	negative regulation of response to oxidative stress	0.225343	0.659357	0	0	3	33
GO:0000256 allantoin catabolic process	1	0.225406	0.074	0.2	Biological Process	GO:0000256	allantoin catabolic process	0.225406	0.659357	0	0	1	5
GO:0000733 DNA strand renaturation	1	0.225406	0.074	0.2	Biological Process	GO:0000733	DNA strand renaturation	0.225406	0.659357	0	0	1	5
GO:0006287 base-excision repair, gap-filling	1	0.225406	0.074	0.2	Biological Process	GO:0006287	base-excision repair, gap-filling	0.225406	0.659357	0	0	1	5
GO:0007028 cytoplasm organization	1	0.225406	0.074	0.2	Biological Process	GO:0007028	cytoplasm organization	0.225406	0.659357	0	0	1	5
GO:0007308 oocyte construction	1	0.225406	0.074	0.2	Biological Process	GO:0007308	oocyte construction	0.225406	0.659357	0	0	1	5
GO:0007309 oocyte axis specification	1	0.225406	0.074	0.2	Biological Process	GO:0007309	oocyte axis specification	0.225406	0.659357	0	0	1	5
GO:0007314 oocyte anterior/posterior axis specification	1	0.225406	0.074	0.2	Biological Process	GO:0007314	oocyte anterior/posterior axis specification	0.225406	0.659357	0	0	1	5
GO:0007315 pole plasm assembly	1	0.225406	0.074	0.2	Biological Process	GO:0007315	pole plasm assembly	0.225406	0.659357	0	0	1	5
GO:0007350 blastoderm segmentation	1	0.225406	0.074	0.2	Biological Process	GO:0007350	blastoderm segmentation	0.225406	0.659357	0	0	1	5
GO:0007351 tripartite regional subdivision	1	0.225406	0.074	0.2	Biological Process	GO:0007351	tripartite regional subdivision	0.225406	0.659357	0	0	1	5
GO:0008358 maternal determination of anterior/posterior axis, embryo	1	0.225406	0.074	0.2	Biological Process	GO:0008358	maternal determination of anterior/posterior axis, embryo	0.225406	0.659357	0	0	1	5
GO:0008595 anterior/posterior axis specification, embryo	1	0.225406	0.074	0.2	Biological Process	GO:0008595	anterior/posterior axis specification, embryo	0.225406	0.659357	0	0	1	5
GO:0009948 anterior/posterior axis specification	1	0.225406	0.074	0.2	Biological Process	GO:0009948	anterior/posterior axis specification	0.225406	0.659357	0	0	1	5
GO:0010032 meiotic chromosome condensation	1	0.225406	0.074	0.2	Biological Process	GO:0010032	meiotic chromosome condensation	0.225406	0.659357	0	0	1	5
GO:0010135 ureide metabolic process	1	0.225406	0.074	0.2	Biological Process	GO:0010135	ureide metabolic process	0.225406	0.659357	0	0	1	5
GO:0010136 ureide catabolic process	1	0.225406	0.074	0.2	Biological Process	GO:0010136	ureide catabolic process	0.225406	0.659357	0	0	1	5
GO:0010247 detection of phosphate ion	1	0.225406	0.074	0.2	Biological Process	GO:0010247	detection of phosphate ion	0.225406	0.659357	0	0	1	5
GO:0010395 rhamnogalacturonan I metabolic process	1	0.225406	0.074	0.2	Biological Process	GO:0010395	rhamnogalacturonan I metabolic process	0.225406	0.659357	0	0	1	5
GO:0010400 rhamnogalacturonan I side chain metabolic process	1	0.225406	0.074	0.2	Biological Process	GO:0010400	rhamnogalacturonan I side chain metabolic process	0.225406	0.659357	0	0	1	5
GO:0010448 vegetative meristem growth	1	0.225406	0.074	0.2	Biological Process	GO:0010448	vegetative meristem growth	0.225406	0.659357	0	0	1	5
GO:0014823 response to activity	1	0.225406	0.074	0.2	Biological Process	GO:0014823	response to activity	0.225406	0.659357	0	0	1	5
GO:0016254 preassembly of GPI anchor in ER membrane	1	0.225406	0.074	0.2	Biological Process	GO:0016254	preassembly of GPI anchor in ER membrane	0.225406	0.659357	0	0	1	5
GO:0019305 dTDP-rhamnose biosynthetic process	1	0.225406	0.074	0.2	Biological Process	GO:0019305	dTDP-rhamnose biosynthetic process	0.225406	0.659357	0	0	1	5
GO:0019918 peptidyl-arginine methylation, to symmetrical-dimethyl arginine	1	0.225406	0.074	0.2	Biological Process	GO:0019918	peptidyl-arginine methylation, to symmetrical-dimethyl arginine	0.225406	0.659357	0	0	1	5
GO:0033059 cellular pigmentation	1	0.225406	0.074	0.2	Biological Process	GO:0033059	cellular pigmentation	0.225406	0.659357	0	0	1	5
GO:0034058 endosomal vesicle fusion	1	0.225406	0.074	0.2	Biological Process	GO:0034058	endosomal vesicle fusion	0.225406	0.659357	0	0	1	5
GO:0043482 cellular pigment accumulation	1	0.225406	0.074	0.2	Biological Process	GO:0043482	cellular pigment accumulation	0.225406	0.659357	0	0	1	5
GO:0046383 dTDP-rhamnose metabolic process	1	0.225406	0.074	0.2	Biological Process	GO:0046383	dTDP-rhamnose metabolic process	0.225406	0.659357	0	0	1	5
GO:0048478 replication fork protection	1	0.225406	0.074	0.2	Biological Process	GO:0048478	replication fork protection	0.225406	0.659357	0	0	1	5
GO:0070141 response to UV-A	1	0.225406	0.074	0.2	Biological Process	GO:0070141	response to UV-A	0.225406	0.659357	0	0	1	5
GO:0070542 response to fatty acid	1	0.225406	0.074	0.2	Biological Process	GO:0070542	response to fatty acid	0.225406	0.659357	0	0	1	5
GO:0071398 cellular response to fatty acid	1	0.225406	0.074	0.2	Biological Process	GO:0071398	cellular response to fatty acid	0.225406	0.659357	0	0	1	5
GO:0071492 cellular response to UV-A	1	0.225406	0.074	0.2	Biological Process	GO:0071492	cellular response to UV-A	0.225406	0.659357	0	0	1	5
GO:0080163 regulation of protein serine/threonine phosphatase activity	1	0.225406	0.074	0.2	Biological Process	GO:0080163	regulation of protein serine/threonine phosphatase activity	0.225406	0.659357	0	0	1	5
GO:0090213 regulation of radial pattern formation	1	0.225406	0.074	0.2	Biological Process	GO:0090213	regulation of radial pattern formation	0.225406	0.659357	0	0	1	5
GO:0090352 regulation of nitrate assimilation	1	0.225406	0.074	0.2	Biological Process	GO:0090352	regulation of nitrate assimilation	0.225406	0.659357	0	0	1	5
GO:0090669 telomerase RNA stabilization	1	0.225406	0.074	0.2	Biological Process	GO:0090669	telomerase RNA stabilization	0.225406	0.659357	0	0	1	5
GO:0097484 dendrite extension	1	0.225406	0.074	0.2	Biological Process	GO:0097484	dendrite extension	0.225406	0.659357	0	0	1	5
GO:0097503 sialylation	1	0.225406	0.074	0.2	Biological Process	GO:0097503	sialylation	0.225406	0.659357	0	0	1	5
GO:1903314 regulation of nitrogen cycle metabolic process	1	0.225406	0.074	0.2	Biological Process	GO:1903314	regulation of nitrogen cycle metabolic process	0.225406	0.659357	0	0	1	5
GO:1903859 regulation of dendrite extension	1	0.225406	0.074	0.2	Biological Process	GO:1903859	regulation of dendrite extension	0.225406	0.659357	0	0	1	5
GO:1903861 positive regulation of dendrite extension	1	0.225406	0.074	0.2	Biological Process	GO:1903861	positive regulation of dendrite extension	0.225406	0.659357	0	0	1	5
GO:0010020 chloroplast fission	4	0.226456	0.297	0.082	Biological Process	GO:0010020	chloroplast fission	0.226456	0.661355	0	0	4	49
GO:0043572 plastid fission	4	0.226456	0.297	0.082	Biological Process	GO:0043572	plastid fission	0.226456	0.661355	0	0	4	49
GO:0000271 polysaccharide biosynthetic process	27	0.227977	2.004	0.058	Biological Process	GO:0000271	polysaccharide biosynthetic process	0.227977	0.664322	0	0	27	464
GO:0019222 regulation of metabolic process	372	0.227985	27.617	0.051	Biological Process	GO:0019222	regulation of metabolic process	0.227985	0.664322	0	0	372	7224
GO:0046983 protein dimerization activity	71	0.227988	5.675	0.054	Molecular Function	GO:0046983	protein dimerization activity	0.227988	0.532463	0	0	71	1310
GO:0009312 oligosaccharide biosynthetic process	8	0.228026	0.594	0.068	Biological Process	GO:0009312	oligosaccharide biosynthetic process	0.228026	0.664322	0	0	8	117
GO:0015145 monosaccharide transmembrane transporter activity	6	0.228265	0.48	0.072	Molecular Function	GO:0015145	monosaccharide transmembrane transporter activity	0.228265	0.532463	0	0	6	83
GO:0040029 regulation of gene expression, epigenetic	25	0.229175	1.856	0.059	Biological Process	GO:0040029	regulation of gene expression, epigenetic	0.229175	0.667128	0	0	25	427
GO:0009514 glyoxysome	3	0.229701	0.231	0.088	Cellular Component	GO:0009514	glyoxysome	0.229701	0.618676	0	0	3	34
GO:0000902 cell morphogenesis	56	0.230057	4.157	0.055	Biological Process	GO:0000902	cell morphogenesis	0.230057	0.669154	0	0	56	1015
GO:1990748 cellular detoxification	19	0.230291	1.411	0.06	Biological Process	GO:1990748	cellular detoxification	0.230291	0.669294	0	0	19	316
GO:0006213 pyrimidine nucleoside metabolic process	6	0.232125	0.445	0.072	Biological Process	GO:0006213	pyrimidine nucleoside metabolic process	0.232125	0.673537	0	0	6	83
GO:0042330 taxis	6	0.232125	0.445	0.072	Biological Process	GO:0042330	taxis	0.232125	0.673537	0	0	6	83
GO:0004675 transmembrane receptor protein serine/threonine kinase activity	20	0.232704	1.599	0.059	Molecular Function	GO:0004675	transmembrane receptor protein serine/threonine kinase activity	0.232704	0.541713	0	0	20	337
GO:0009639 response to red or far red light	29	0.232951	2.153	0.058	Biological Process	GO:0009639	response to red or far red light	0.232951	0.675389	0	0	29	503
GO:0006888 ER to Golgi vesicle-mediated transport	11	0.233506	0.817	0.064	Biological Process	GO:0006888	ER to Golgi vesicle-mediated transport	0.233506	0.676453	0	0	11	171
GO:0005783 endoplasmic reticulum	106	0.235046	8.16	0.052	Cellular Component	GO:0005783	endoplasmic reticulum	0.235046	0.6301	0	0	106	2025
GO:0004743 pyruvate kinase activity	3	0.236138	0.24	0.088	Molecular Function	GO:0004743	pyruvate kinase activity	0.236138	0.547476	0	0	3	34
GO:0030955 potassium ion binding	3	0.236138	0.24	0.088	Molecular Function	GO:0030955	potassium ion binding	0.236138	0.547476	0	0	3	34
GO:0007623 circadian rhythm	18	0.236242	1.336	0.06	Biological Process	GO:0007623	circadian rhythm	0.236242	0.683828	0	0	18	299
GO:0015979 photosynthesis	26	0.237192	1.93	0.058	Biological Process	GO:0015979	photosynthesis	0.237192	0.685702	0	0	26	448
GO:0050686 negative regulation of mRNA processing	4	0.23727	0.297	0.08	Biological Process	GO:0050686	negative regulation of mRNA processing	0.23727	0.685702	0	0	4	50
GO:0051129 negative regulation of cellular component organization	17	0.238023	1.262	0.06	Biological Process	GO:0051129	negative regulation of cellular component organization	0.238023	0.687326	0	0	17	281
GO:0016558 protein import into peroxisome matrix	3	0.238731	0.223	0.088	Biological Process	GO:0016558	protein import into peroxisome matrix	0.238731	0.688265	0	0	3	34
GO:0045815 positive regulation of gene expression, epigenetic	3	0.238731	0.223	0.088	Biological Process	GO:0045815	positive regulation of gene expression, epigenetic	0.238731	0.688265	0	0	3	34
GO:0046939 nucleotide phosphorylation	11	0.239157	0.817	0.064	Biological Process	GO:0046939	nucleotide phosphorylation	0.239157	0.688941	0	0	11	172
GO:1901617 organic hydroxy compound biosynthetic process	25	0.239727	1.856	0.058	Biological Process	GO:1901617	organic hydroxy compound biosynthetic process	0.239727	0.690031	0	0	25	430
GO:0007052 mitotic spindle organization	5	0.240702	0.371	0.075	Biological Process	GO:0007052	mitotic spindle organization	0.240702	0.691177	0	0	5	67
GO:0009220 pyrimidine ribonucleotide biosynthetic process	5	0.240702	0.371	0.075	Biological Process	GO:0009220	pyrimidine ribonucleotide biosynthetic process	0.240702	0.691177	0	0	5	67
GO:0046132 pyrimidine ribonucleoside biosynthetic process	5	0.240702	0.371	0.075	Biological Process	GO:0046132	pyrimidine ribonucleoside biosynthetic process	0.240702	0.691177	0	0	5	67
GO:0061013 regulation of mRNA catabolic process	8	0.241722	0.594	0.067	Biological Process	GO:0061013	regulation of mRNA catabolic process	0.241722	0.693554	0	0	8	119
GO:0004652 polynucleotide adenylyltransferase activity	2	0.241799	0.16	0.105	Molecular Function	GO:0004652	polynucleotide adenylyltransferase activity	0.241799	0.557209	0	0	2	19
GO:0005092 GDP-dissociation inhibitor activity	2	0.241799	0.16	0.105	Molecular Function	GO:0005092	GDP-dissociation inhibitor activity	0.241799	0.557209	0	0	2	19
GO:0070181 small ribosomal subunit rRNA binding	2	0.241799	0.16	0.105	Molecular Function	GO:0070181	small ribosomal subunit rRNA binding	0.241799	0.557209	0	0	2	19
GO:0032870 cellular response to hormone stimulus	116	0.242378	8.612	0.053	Biological Process	GO:0032870	cellular response to hormone stimulus	0.242378	0.694881	0	0	116	2184
GO:0072686 mitotic spindle	3	0.242859	0.231	0.086	Cellular Component	GO:0072686	mitotic spindle	0.242859	0.635612	0	0	3	35
GO:0009720 detection of hormone stimulus	2	0.243826	0.148	0.105	Biological Process	GO:0009720	detection of hormone stimulus	0.243826	0.695154	0	0	2	19
GO:0009726 detection of endogenous stimulus	2	0.243826	0.148	0.105	Biological Process	GO:0009726	detection of endogenous stimulus	0.243826	0.695154	0	0	2	19
GO:0010031 circumnutation	2	0.243826	0.148	0.105	Biological Process	GO:0010031	circumnutation	0.243826	0.695154	0	0	2	19
GO:0015691 cadmium ion transport	2	0.243826	0.148	0.105	Biological Process	GO:0015691	cadmium ion transport	0.243826	0.695154	0	0	2	19
GO:0034724 DNA replication-independent nucleosome organization	2	0.243826	0.148	0.105	Biological Process	GO:0034724	DNA replication-independent nucleosome organization	0.243826	0.695154	0	0	2	19
GO:0043171 peptide catabolic process	2	0.243826	0.148	0.105	Biological Process	GO:0043171	peptide catabolic process	0.243826	0.695154	0	0	2	19
GO:0097501 stress response to metal ion	2	0.243826	0.148	0.105	Biological Process	GO:0097501	stress response to metal ion	0.243826	0.695154	0	0	2	19
GO:0004721 phosphoprotein phosphatase activity	20	0.244682	1.599	0.059	Molecular Function	GO:0004721	phosphoprotein phosphatase activity	0.244682	0.562719	0	0	20	340
GO:0004553 hydrolase activity, hydrolyzing O-glycosyl compounds	30	0.246323	2.398	0.057	Molecular Function	GO:0004553	hydrolase activity, hydrolyzing O-glycosyl compounds	0.246323	0.563107	0	0	30	529
GO:0008023 transcription elongation factor complex	4	0.247866	0.308	0.077	Cellular Component	GO:0008023	transcription elongation factor complex	0.247866	0.635612	0	0	4	52
GO:0043622 cortical microtubule organization	6	0.248701	0.445	0.071	Biological Process	GO:0043622	cortical microtubule organization	0.248701	0.707398	0	0	6	85
GO:0010200 response to chitin	16	0.248894	1.188	0.06	Biological Process	GO:0010200	response to chitin	0.248894	0.707398	0	0	16	265
GO:0099536 synaptic signaling	5	0.250105	0.371	0.074	Biological Process	GO:0099536	synaptic signaling	0.250105	0.707398	0	0	5	68
GO:0099537 trans-synaptic signaling	5	0.250105	0.371	0.074	Biological Process	GO:0099537	trans-synaptic signaling	0.250105	0.707398	0	0	5	68
GO:1903338 regulation of cell wall organization or biogenesis	5	0.250105	0.371	0.074	Biological Process	GO:1903338	regulation of cell wall organization or biogenesis	0.250105	0.707398	0	0	5	68
GO:0000819 sister chromatid segregation	9	0.250223	0.668	0.065	Biological Process	GO:0000819	sister chromatid segregation	0.250223	0.707398	0	0	9	138
GO:0098660 inorganic ion transmembrane transport	46	0.250892	3.415	0.055	Biological Process	GO:0098660	inorganic ion transmembrane transport	0.250892	0.707398	0	0	46	832
GO:0010494 cytoplasmic stress granule	6	0.251007	0.462	0.069	Cellular Component	GO:0010494	cytoplasmic stress granule	0.251007	0.635612	0	0	6	87
GO:0051276 chromosome organization	72	0.251062	5.345	0.054	Biological Process	GO:0051276	chromosome organization	0.251062	0.707398	0	0	72	1333
GO:0022890 inorganic cation transmembrane transporter activity	41	0.251782	3.277	0.055	Molecular Function	GO:0022890	inorganic cation transmembrane transporter activity	0.251782	0.563107	0	0	41	741
GO:0001568 blood vessel development	3	0.252249	0.223	0.086	Biological Process	GO:0001568	blood vessel development	0.252249	0.707398	0	0	3	35
GO:0001944 vasculature development	3	0.252249	0.223	0.086	Biological Process	GO:0001944	vasculature development	0.252249	0.707398	0	0	3	35
GO:0009938 negative regulation of gibberellic acid mediated signaling pathway	3	0.252249	0.223	0.086	Biological Process	GO:0009938	negative regulation of gibberellic acid mediated signaling pathway	0.252249	0.707398	0	0	3	35
GO:0015695 organic cation transport	3	0.252249	0.223	0.086	Biological Process	GO:0015695	organic cation transport	0.252249	0.707398	0	0	3	35
GO:0030203 glycosaminoglycan metabolic process	3	0.252249	0.223	0.086	Biological Process	GO:0030203	glycosaminoglycan metabolic process	0.252249	0.707398	0	0	3	35
GO:0032878 regulation of establishment or maintenance of cell polarity	3	0.252249	0.223	0.086	Biological Process	GO:0032878	regulation of establishment or maintenance of cell polarity	0.252249	0.707398	0	0	3	35
GO:0035148 tube formation	3	0.252249	0.223	0.086	Biological Process	GO:0035148	tube formation	0.252249	0.707398	0	0	3	35
GO:0045839 negative regulation of mitotic nuclear division	3	0.252249	0.223	0.086	Biological Process	GO:0045839	negative regulation of mitotic nuclear division	0.252249	0.707398	0	0	3	35
GO:0048514 blood vessel morphogenesis	3	0.252249	0.223	0.086	Biological Process	GO:0048514	blood vessel morphogenesis	0.252249	0.707398	0	0	3	35
GO:0090114 COPII-coated vesicle budding	3	0.252249	0.223	0.086	Biological Process	GO:0090114	COPII-coated vesicle budding	0.252249	0.707398	0	0	3	35
GO:1901799 negative regulation of proteasomal protein catabolic process	3	0.252249	0.223	0.086	Biological Process	GO:1901799	negative regulation of proteasomal protein catabolic process	0.252249	0.707398	0	0	3	35
GO:1903051 negative regulation of proteolysis involved in cellular protein catabolic process	3	0.252249	0.223	0.086	Biological Process	GO:1903051	negative regulation of proteolysis involved in cellular protein catabolic process	0.252249	0.707398	0	0	3	35
GO:1903363 negative regulation of cellular protein catabolic process	3	0.252249	0.223	0.086	Biological Process	GO:1903363	negative regulation of cellular protein catabolic process	0.252249	0.707398	0	0	3	35
[truncated: 3,314 more rows]

## Sheet: Supplementary data 4
Supplementary data 4: PCG Prediction
#query	seed_ortholog	evalue	score	eggNOG_OGs	max_annot_lvl	COG_category	Description	Preferred_name	GOs	EC	KEGG_ko	KEGG_Pathway	KEGG_Module	KEGG_Reaction	KEGG_rclass	BRITE	KEGG_TC	CAZy	BiGG_Reaction	PFAMs
Crochr1G000003.m1	3694.POPTR_0008s21840.1	1.71e-15	73.2	2CYIR@1|root,2S4NT@2759|Eukaryota,37W8S@33090|Viridiplantae,3GMRH@35493|Streptophyta	35493|Streptophyta	-	-	-	-	-	-	-	-	-	-	-	-	-	-	-
Crochr1G000004.m1	3880.AES97342	4.03e-109	348	KOG4853@1|root,KOG4853@2759|Eukaryota,37UN2@33090|Viridiplantae,3GJA7@35493|Streptophyta	35493|Streptophyta	S	mitotic sister chromatid biorientation	-	-	-	-	-	-	-	-	-	-	-	-	-
Crochr1G000005.m1	3712.Bo00616s030.1	3.73e-145	417	2CUMQ@1|root,2RN4M@2759|Eukaryota,37U2D@33090|Viridiplantae,3GIK7@35493|Streptophyta	3712.Bo00616s030.1|-	-	-	-	-	-	-	-	-	-	-	-	-	-	-	-
Crochr1G000021.m1	4538.ORGLA03G0204800.1	2.09e-60	186	2B1MW@1|root,2S0AS@2759|Eukaryota,37V2H@33090|Viridiplantae,3GJ9Y@35493|Streptophyta,3M9XI@4447|Liliopsida,3IR5N@38820|Poales	35493|Streptophyta	-	-	-	-	-	-	-	-	-	-	-	-	-	-	-
Crochr1G000031.m1	981085.XP_010106598.1	6.15e-29	108	2E13Y@1|root,2S8GD@2759|Eukaryota,38843@33090|Viridiplantae,3GW79@35493|Streptophyta,4JVE3@91835|fabids	35493|Streptophyta	-	-	-	-	-	-	-	-	-	-	-	-	-	-	-
Crochr1G000035.m1	3880.AES97342	1.12e-107	344	KOG4853@1|root,KOG4853@2759|Eukaryota,37UN2@33090|Viridiplantae,3GJA7@35493|Streptophyta	35493|Streptophyta	S	mitotic sister chromatid biorientation	-	-	-	-	-	-	-	-	-	-	-	-	-
Crochr1G000036.m1	50452.A0A087HEV4	1.38e-83	253	2BG5J@1|root,2S18N@2759|Eukaryota	2759|Eukaryota	-	-	-	-	-	-	-	-	-	-	-	-	-	-	-
Crochr1G000047.m1	4538.ORGLA03G0204800.1	2.09e-60	186	2B1MW@1|root,2S0AS@2759|Eukaryota,37V2H@33090|Viridiplantae,3GJ9Y@35493|Streptophyta,3M9XI@4447|Liliopsida,3IR5N@38820|Poales	35493|Streptophyta	-	-	-	-	-	-	-	-	-	-	-	-	-	-	-
Crochr1G000054.m1	3712.Bo00616s030.1	3.73e-145	417	2CUMQ@1|root,2RN4M@2759|Eukaryota,37U2D@33090|Viridiplantae,3GIK7@35493|Streptophyta	3712.Bo00616s030.1|-	-	-	-	-	-	-	-	-	-	-	-	-	-	-	-
Crochr1G000058.m1	3880.AES97342	4.03e-109	348	KOG4853@1|root,KOG4853@2759|Eukaryota,37UN2@33090|Viridiplantae,3GJA7@35493|Streptophyta	35493|Streptophyta	S	mitotic sister chromatid biorientation	-	-	-	-	-	-	-	-	-	-	-	-	-
Crochr1G000059.m1	3712.Bo00616s030.1	3.73e-145	417	2CUMQ@1|root,2RN4M@2759|Eukaryota,37U2D@33090|Viridiplantae,3GIK7@35493|Streptophyta	3712.Bo00616s030.1|-	-	-	-	-	-	-	-	-	-	-	-	-	-	-	-
Crochr1G000066.m1	981085.XP_010106598.1	6.15e-29	108	2E13Y@1|root,2S8GD@2759|Eukaryota,38843@33090|Viridiplantae,3GW79@35493|Streptophyta,4JVE3@91835|fabids	35493|Streptophyta	-	-	-	-	-	-	-	-	-	-	-	-	-	-	-
Crochr1G000068.m1	3880.AES97342	4.03e-109	348	KOG4853@1|root,KOG4853@2759|Eukaryota,37UN2@33090|Viridiplantae,3GJA7@35493|Streptophyta	35493|Streptophyta	S	mitotic sister chromatid biorientation	-	-	-	-	-	-	-	-	-	-	-	-	-
Crochr1G000069.m1	3712.Bo00616s030.1	3.73e-145	417	2CUMQ@1|root,2RN4M@2759|Eukaryota,37U2D@33090|Viridiplantae,3GIK7@35493|Streptophyta	3712.Bo00616s030.1|-	-	-	-	-	-	-	-	-	-	-	-	-	-	-	-
Crochr1G000070.m1	4558.Sb01g024221.1	2.55e-20	84.3	2CZBW@1|root,2S9KI@2759|Eukaryota,37XCF@33090|Viridiplantae,3GMEH@35493|Streptophyta	35493|Streptophyta	-	-	-	-	-	-	-	-	-	-	-	-	-	-	-
Crochr1G000073.m1	981085.XP_010106598.1	6.15e-29	108	2E13Y@1|root,2S8GD@2759|Eukaryota,38843@33090|Viridiplantae,3GW79@35493|Streptophyta,4JVE3@91835|fabids	35493|Streptophyta	-	-	-	-	-	-	-	-	-	-	-	-	-	-	-
Crochr1G000075.m1	3880.AES97342	4.03e-109	348	KOG4853@1|root,KOG4853@2759|Eukaryota,37UN2@33090|Viridiplantae,3GJA7@35493|Streptophyta	35493|Streptophyta	S	mitotic sister chromatid biorientation	-	-	-	-	-	-	-	-	-	-	-	-	-
Crochr1G000076.m1	3712.Bo00616s030.1	3.73e-145	417	2CUMQ@1|root,2RN4M@2759|Eukaryota,37U2D@33090|Viridiplantae,3GIK7@35493|Streptophyta	3712.Bo00616s030.1|-	-	-	-	-	-	-	-	-	-	-	-	-	-	-	-
Crochr1G000077.m1	4558.Sb01g024221.1	2.55e-20	84.3	2CZBW@1|root,2S9KI@2759|Eukaryota,37XCF@33090|Viridiplantae,3GMEH@35493|Streptophyta	35493|Streptophyta	-	-	-	-	-	-	-	-	-	-	-	-	-	-	-
Crochr1G000080.m1	981085.XP_010106598.1	6.15e-29	108	2E13Y@1|root,2S8GD@2759|Eukaryota,38843@33090|Viridiplantae,3GW79@35493|Streptophyta,4JVE3@91835|fabids	35493|Streptophyta	-	-	-	-	-	-	-	-	-	-	-	-	-	-	-
Crochr1G000092.m1	90675.XP_010412539.1	7.32e-14	75.1	COG2801@1|root,KOG0017@2759|Eukaryota,37VN9@33090|Viridiplantae,3GJMM@35493|Streptophyta,3I1GT@3699|Brassicales	35493|Streptophyta	L	gag-polypeptide of LTR copia-type	-	-	-	-	-	-	-	-	-	-	-	-	Retrotran_gag_2,Retrotran_gag_3
Crochr1G000095.m1	29730.Gorai.006G008100.1	7.61e-56	188	2A2HB@1|root,2RY32@2759|Eukaryota,37TZZ@33090|Viridiplantae,3G96J@35493|Streptophyta	35493|Streptophyta	S	Methyl-CpG-binding domain protein	-	GO:0000700,GO:0000785,GO:0003674,GO:0003676,GO:0003677,GO:0003690,GO:0003696,GO:0003824,GO:0004518,GO:0004519,GO:0004520,GO:0004536,GO:0005488,GO:0005575,GO:0005622,GO:0005623,GO:0005634,GO:0005654,GO:0005694,GO:0006139,GO:0006220,GO:0006244,GO:0006259,GO:0006281,GO:0006284,GO:0006285,GO:0006304,GO:0006725,GO:0006753,GO:0006793,GO:0006796,GO:0006807,GO:0006950,GO:0006974,GO:0008150,GO:0008152,GO:…	-	ko:K10801	ko03410,map03410	-	-	-	ko00000,ko00001,ko01000,ko03036,ko03400	-	-	-	HhH-GPD
Crochr1G000095.m2	29730.Gorai.006G008100.1	7.61e-56	188	2A2HB@1|root,2RY32@2759|Eukaryota,37TZZ@33090|Viridiplantae,3G96J@35493|Streptophyta	35493|Streptophyta	S	Methyl-CpG-binding domain protein	-	GO:0000700,GO:0000785,GO:0003674,GO:0003676,GO:0003677,GO:0003690,GO:0003696,GO:0003824,GO:0004518,GO:0004519,GO:0004520,GO:0004536,GO:0005488,GO:0005575,GO:0005622,GO:0005623,GO:0005634,GO:0005654,GO:0005694,GO:0006139,GO:0006220,GO:0006244,GO:0006259,GO:0006281,GO:0006284,GO:0006285,GO:0006304,GO:0006725,GO:0006753,GO:0006793,GO:0006796,GO:0006807,GO:0006950,GO:0006974,GO:0008150,GO:0008152,GO:…	-	ko:K10801	ko03410,map03410	-	-	-	ko00000,ko00001,ko01000,ko03036,ko03400	-	-	-	HhH-GPD
Crochr1G000096.m1	4513.MLOC_41593.1	8.26e-38	145	KOG1075@1|root,KOG1075@2759|Eukaryota	2759|Eukaryota	E	Ribonuclease H protein	-	-	-	-	-	-	-	-	-	-	-	-	RVT_1
Crochr1G000097.m1	3641.EOY22955	1.39e-36	144	COG0545@1|root,KOG0552@2759|Eukaryota,37I1N@33090|Viridiplantae,3GBVQ@35493|Streptophyta	35493|Streptophyta	O	Peptidyl-prolyl cis-trans isomerase	-	GO:0003674,GO:0005488,GO:0005515,GO:0005575,GO:0005622,GO:0005623,GO:0005634,GO:0005730,GO:0005737,GO:0005829,GO:0006323,GO:0006325,GO:0006333,GO:0006334,GO:0006996,GO:0008150,GO:0009987,GO:0016043,GO:0022607,GO:0031497,GO:0031974,GO:0031981,GO:0034622,GO:0034728,GO:0042393,GO:0043226,GO:0043227,GO:0043228,GO:0043229,GO:0043231,GO:0043232,GO:0043233,GO:0043933,GO:0044085,GO:0044422,GO:0044424,GO:…	5.2.1.8	ko:K14826	-	-	-	-	ko00000,ko01000,ko03009	-	-	-	FKBP_C
Crochr1G000098.m1	4641.GSMUA_Achr3P12860_001	1.02e-58	189	2A2HB@1|root,2RY32@2759|Eukaryota,37TZZ@33090|Viridiplantae,3G96J@35493|Streptophyta,3KYMT@4447|Liliopsida	35493|Streptophyta	S	Methyl-CpG-binding domain protein	-	GO:0000700,GO:0000785,GO:0003674,GO:0003676,GO:0003677,GO:0003690,GO:0003696,GO:0003824,GO:0004518,GO:0004519,GO:0004520,GO:0004536,GO:0005488,GO:0005575,GO:0005622,GO:0005623,GO:0005634,GO:0005654,GO:0005694,GO:0006139,GO:0006220,GO:0006244,GO:0006259,GO:0006281,GO:0006284,GO:0006285,GO:0006304,GO:0006725,GO:0006753,GO:0006793,GO:0006796,GO:0006807,GO:0006950,GO:0006974,GO:0008150,GO:0008152,GO:…	-	ko:K10801	ko03410,map03410	-	-	-	ko00000,ko00001,ko01000,ko03036,ko03400	-	-	-	HhH-GPD
Crochr1G000099.m1	42345.XP_008805156.1	4.1e-67	238	28IWD@1|root,2QR82@2759|Eukaryota,37IT2@33090|Viridiplantae,3G9IF@35493|Streptophyta,3KR2G@4447|Liliopsida	35493|Streptophyta	S	NLI interacting factor-like phosphatase	-	-	-	-	-	-	-	-	-	-	-	-	NIF
Crochr1G000102.m1	4513.MLOC_74585.1	1.46e-132	388	28JQY@1|root,2QS4C@2759|Eukaryota,37PTE@33090|Viridiplantae,3G8NK@35493|Streptophyta,3M4AP@4447|Liliopsida,3IFNY@38820|Poales	35493|Streptophyta	S	Root cap	-	-	-	-	-	-	-	-	-	-	-	-	Root_cap
Crochr1G000103.m1	4555.Si002235m	8.06e-116	344	28JQY@1|root,2R3AT@2759|Eukaryota,384A8@33090|Viridiplantae,3GSA0@35493|Streptophyta,3KKVB@4447|Liliopsida,3IGQJ@38820|Poales	35493|Streptophyta	S	Root cap	-	-	-	-	-	-	-	-	-	-	-	-	Root_cap
Crochr1G000104.m1	4577.GRMZM2G097258_P01	4.66e-168	488	COG0324@1|root,KOG1384@2759|Eukaryota,37MKD@33090|Viridiplantae,3GHDH@35493|Streptophyta,3KRSG@4447|Liliopsida,3I4YB@38820|Poales	35493|Streptophyta	J	Catalyzes the transfer of a dimethylallyl group onto the adenine at position 37	-	GO:0003674,GO:0003824,GO:0005575,GO:0005622,GO:0005623,GO:0005737,GO:0005739,GO:0005829,GO:0006139,GO:0006396,GO:0006399,GO:0006400,GO:0006725,GO:0006807,GO:0008033,GO:0008150,GO:0008152,GO:0009058,GO:0009308,GO:0009451,GO:0009690,GO:0009691,GO:0009824,GO:0009987,GO:0010467,GO:0010817,GO:0016070,GO:0016740,GO:0016765,GO:0034470,GO:0034641,GO:0034660,GO:0034754,GO:0042445,GO:0042446,GO:0043170,GO:…	2.5.1.75	ko:K00791	ko00908,ko01100,ko01110,map00908,map01100,map01110	-	R01122	RC02820	ko00000,ko00001,ko01000,ko01006,ko03016	-	-	-	IPPT
Crochr1G000105.m1	15368.BRADI2G61930.1	1.99e-10	60.5	2C2R9@1|root,2S7JH@2759|Eukaryota,37X1H@33090|Viridiplantae,3GK6M@35493|Streptophyta,3M7RG@4447|Liliopsida,3IJ63@38820|Poales	35493|Streptophyta	-	-	-	-	-	-	-	-	-	-	-	-	-	-	-
Crochr1G000106.m1	42345.XP_008784125.1	6.25e-179	508	COG2940@1|root,KOG1083@2759|Eukaryota,37JTV@33090|Viridiplantae,3GAD5@35493|Streptophyta,3KTM5@4447|Liliopsida	35493|Streptophyta	K	Histone-lysine n-methyltransferase	ATXR5	GO:0003674,GO:0003824,GO:0005575,GO:0005622,GO:0005623,GO:0005634,GO:0005737,GO:0006275,GO:0006325,GO:0006464,GO:0006479,GO:0006807,GO:0006996,GO:0007275,GO:0008150,GO:0008152,GO:0008168,GO:0008170,GO:0008213,GO:0008276,GO:0008757,GO:0009292,GO:0009294,GO:0009507,GO:0009536,GO:0009555,GO:0009889,GO:0009987,GO:0010556,GO:0016043,GO:0016278,GO:0016279,GO:0016569,GO:0016570,GO:0016571,GO:0016740,GO:…	-	-	-	-	-	-	-	-	-	-	PHD,SET
Crochr1G000107.m1	42345.XP_008790296.1	4.8e-66	221	2CNI6@1|root,2QWH1@2759|Eukaryota,37KXR@33090|Viridiplantae,3G86U@35493|Streptophyta,3KUR8@4447|Liliopsida	35493|Streptophyta	S	Zinc-finger domain of monoamine-oxidase A repressor R1	-	-	-	-	-	-	-	-	-	-	-	-	zf-4CXXC_R1
Crochr1G000108.m1	4577.GRMZM2G176910_P01	2.09e-54	187	KOG4483@1|root,KOG4483@2759|Eukaryota,37M34@33090|Viridiplantae,3GBGD@35493|Streptophyta,3KY52@4447|Liliopsida,3I5MK@38820|Poales	35493|Streptophyta	S	Coiled-coil domain-containing protein	-	-	-	-	-	-	-	-	-	-	-	-	-
Crochr1G000110.m1	57918.XP_004297853.1	4.74e-40	142	COG2801@1|root,KOG0017@2759|Eukaryota,37YEC@33090|Viridiplantae,3GNT9@35493|Streptophyta,4JTHD@91835|fabids	35493|Streptophyta	L	Enzymatic polyprotein-like	-	-	-	-	-	-	-	-	-	-	-	-	Peptidase_A3,RVT_1
Crochr1G000112.m1	4558.Sb03g047000.1	4.19e-89	266	2A3DW@1|root,2RY52@2759|Eukaryota,37KGF@33090|Viridiplantae,3GI52@35493|Streptophyta,3KZIK@4447|Liliopsida,3I326@38820|Poales	35493|Streptophyta	S	Nuclear transport factor 2 (NTF2) family protein	-	-	-	-	-	-	-	-	-	-	-	-	-
Crochr1G000112.m2	4558.Sb03g047000.1	4.19e-89	266	2A3DW@1|root,2RY52@2759|Eukaryota,37KGF@33090|Viridiplantae,3GI52@35493|Streptophyta,3KZIK@4447|Liliopsida,3I326@38820|Poales	35493|Streptophyta	S	Nuclear transport factor 2 (NTF2) family protein	-	-	-	-	-	-	-	-	-	-	-	-	-
Crochr1G000113.m1	42345.XP_008799687.1	5.3e-103	352	28J0G@1|root,2QRCD@2759|Eukaryota,37RJ8@33090|Viridiplantae,3GHE9@35493|Streptophyta,3KPC8@4447|Liliopsida	35493|Streptophyta	S	TPL-binding domain in jasmonate signalling	-	-	-	-	-	-	-	-	-	-	-	-	Acetyltransf_1,Acetyltransf_10,Jas
Crochr1G000114.m1	4641.GSMUA_Achr8P30450_001	7.25e-205	584	COG0612@1|root,KOG2067@2759|Eukaryota,37TDB@33090|Viridiplantae,3GFGV@35493|Streptophyta,3KU15@4447|Liliopsida	35493|Streptophyta	O	Peptidase M16 inactive domain	-	-	3.4.24.64	ko:K01412	-	-	-	-	ko00000,ko01000,ko01002,ko03029	-	-	-	Peptidase_M16,Peptidase_M16_C
Crochr1G000115.m1	3641.EOY33368	1.81e-19	98.6	COG4886@1|root,KOG0531@2759|Eukaryota,37QAR@33090|Viridiplantae,3G8R7@35493|Streptophyta	35493|Streptophyta	T	Protein phosphatase 1 regulatory subunit	-	GO:0000003,GO:0000226,GO:0001578,GO:0001669,GO:0002177,GO:0005575,GO:0005622,GO:0005623,GO:0005737,GO:0005856,GO:0006996,GO:0007010,GO:0007017,GO:0007276,GO:0007283,GO:0008150,GO:0009987,GO:0012505,GO:0015630,GO:0016043,GO:0019953,GO:0022414,GO:0022607,GO:0030030,GO:0030031,GO:0030141,GO:0031410,GO:0031982,GO:0032501,GO:0032504,GO:0035082,GO:0043226,GO:0043227,GO:0043228,GO:0043229,GO:0043232,GO:…	-	ko:K17550	-	-	-	-	ko00000,ko01009	-	-	-	LRR_4,LRR_6,LRR_8
Crochr1G000116.m1	4577.GRMZM2G174221_P02	2.1e-67	205	KOG2174@1|root,KOG2174@2759|Eukaryota,37UTY@33090|Viridiplantae,3GIZS@35493|Streptophyta,3M00H@4447|Liliopsida,3IHPR@38820|Poales	35493|Streptophyta	T	Vacuolar protein sorting 55	-	-	-	-	-	-	-	-	-	-	-	-	Vps55
Crochr1G000117.m1	4555.Si006836m	1.94e-150	433	COG0528@1|root,2QVYQ@2759|Eukaryota,37JUM@33090|Viridiplantae,3GG9S@35493|Streptophyta,3KKXE@4447|Liliopsida,3I2PW@38820|Poales	35493|Streptophyta	F	Amino acid kinase family	-	-	2.7.4.22	ko:K09903	ko00240,ko01100,map00240,map01100	-	R00158	RC00002	ko00000,ko00001,ko01000	-	-	-	AA_kinase
Crochr1G000119.m1	42345.XP_008781476.1	5.77e-118	357	KOG2858@1|root,KOG2858@2759|Eukaryota,37RFU@33090|Viridiplantae,3GH4K@35493|Streptophyta,3KPZI@4447|Liliopsida	35493|Streptophyta	S	Box C D snoRNA protein	-	-	-	-	-	-	-	-	-	-	-	-	TIC20,zf-HIT
Crochr1G000120.m1	42345.XP_008784979.1	2.49e-100	308	28JU8@1|root,2QS85@2759|Eukaryota,37NMQ@33090|Viridiplantae,3G8AU@35493|Streptophyta,3KVZM@4447|Liliopsida	35493|Streptophyta	S	photosynthetic electron transport in photosystem I	-	GO:0005575,GO:0005622,GO:0005623,GO:0005737,GO:0006091,GO:0008150,GO:0008152,GO:0009507,GO:0009536,GO:0009767,GO:0009773,GO:0009893,GO:0009987,GO:0010468,GO:0010604,GO:0010628,GO:0015979,GO:0016020,GO:0019222,GO:0019684,GO:0022900,GO:0043226,GO:0043227,GO:0043229,GO:0043231,GO:0044237,GO:0044424,GO:0044444,GO:0044464,GO:0048518,GO:0050789,GO:0055114,GO:0060255,GO:0065007	-	-	-	-	-	-	-	-	-	-	-
Crochr1G000121.m1	4558.Sb03g046710.1	8.29e-160	453	2CAM1@1|root,2QPV3@2759|Eukaryota,37QXV@33090|Viridiplantae,3GCNG@35493|Streptophyta,3KQCS@4447|Liliopsida,3IE5G@38820|Poales	35493|Streptophyta	S	Ceramidase	-	-	-	-	-	-	-	-	-	-	-	-	Ceramidase
Crochr1G000122.m1	4530.OS10T0567400-01	0	898	COG4638@1|root,2QS20@2759|Eukaryota,37QNK@33090|Viridiplantae,3G9D1@35493|Streptophyta,3KVWB@4447|Liliopsida,3I5EI@38820|Poales	35493|Streptophyta	P	Chlorophyllide a oxygenase	-	GO:0003674,GO:0003824,GO:0004497,GO:0005575,GO:0005622,GO:0005623,GO:0005737,GO:0006725,GO:0006778,GO:0006779,GO:0006807,GO:0008150,GO:0008152,GO:0009058,GO:0009507,GO:0009526,GO:0009528,GO:0009534,GO:0009535,GO:0009536,GO:0009579,GO:0009706,GO:0009941,GO:0009987,GO:0010277,GO:0015994,GO:0015995,GO:0016020,GO:0016491,GO:0016701,GO:0016703,GO:0018130,GO:0019438,GO:0019866,GO:0031090,GO:0031967,GO:…	1.14.13.122	ko:K13600	ko00860,ko01100,ko01110,map00860,map01100,map01110	-	R08203,R08204,R10080	RC00116,RC00269,RC00769	ko00000,ko00001,ko01000	-	-	-	PaO,Rieske
Crochr1G000123.m1	42345.XP_008781501.1	8.06e-184	534	COG0517@1|root,2QVK2@2759|Eukaryota,37N4N@33090|Viridiplantae,3G8UD@35493|Streptophyta,3KR9H@4447|Liliopsida	35493|Streptophyta	S	CBS domain-containing protein	-	-	-	-	-	-	-	-	-	-	-	-	CBS,PB1
Crochr1G000124.m1	3641.EOY04889	3.17e-61	197	28MX8@1|root,2QUFQ@2759|Eukaryota,37SBT@33090|Viridiplantae,3GIFI@35493|Streptophyta	35493|Streptophyta	-	-	-	-	-	-	-	-	-	-	-	-	-	-	RRM_1
Crochr1G000125.m1	42345.XP_008784215.1	1.56e-52	167	KOG3442@1|root,KOG3442@2759|Eukaryota,37V6M@33090|Viridiplantae,3GJ1F@35493|Streptophyta,3M6ER@4447|Liliopsida	35493|Streptophyta	S	Mitochondrial import inner membrane translocase subunit	-	GO:0002237,GO:0002831,GO:0002832,GO:0005575,GO:0005622,GO:0005623,GO:0005737,GO:0005739,GO:0005740,GO:0005743,GO:0005744,GO:0006605,GO:0006626,GO:0006810,GO:0006839,GO:0006886,GO:0006996,GO:0007005,GO:0008104,GO:0008150,GO:0009605,GO:0009607,GO:0009617,GO:0009892,GO:0009987,GO:0010033,GO:0010817,GO:0015031,GO:0015833,GO:0016020,GO:0016043,GO:0017038,GO:0019222,GO:0019866,GO:0030150,GO:0031090,GO:…	-	ko:K17805	-	-	-	-	ko00000,ko03029	-	-	-	Pam16
Crochr1G000125.m2	42345.XP_008781512.1	2.78e-52	169	KOG3442@1|root,KOG3442@2759|Eukaryota,37V6M@33090|Viridiplantae,3GJ1F@35493|Streptophyta,3M6ER@4447|Liliopsida	35493|Streptophyta	S	Mitochondrial import inner membrane translocase subunit	-	GO:0002237,GO:0002831,GO:0002832,GO:0005575,GO:0005622,GO:0005623,GO:0005737,GO:0005739,GO:0005740,GO:0005743,GO:0005744,GO:0006605,GO:0006626,GO:0006810,GO:0006839,GO:0006886,GO:0006996,GO:0007005,GO:0008104,GO:0008150,GO:0009605,GO:0009607,GO:0009617,GO:0009892,GO:0009987,GO:0010033,GO:0010817,GO:0015031,GO:0015833,GO:0016020,GO:0016043,GO:0017038,GO:0019222,GO:0019866,GO:0030150,GO:0031090,GO:…	-	ko:K17805	-	-	-	-	ko00000,ko03029	-	-	-	Pam16
Crochr1G000126.m1	4530.OS01T0144100-01	2.42e-44	154	COG1357@1|root,2QQA1@2759|Eukaryota,37KZE@33090|Viridiplantae,3G8GB@35493|Streptophyta,3KTHS@4447|Liliopsida,3IFC0@38820|Poales	35493|Streptophyta	S	Pentapeptide repeats (9 copies)	-	GO:0005575,GO:0005622,GO:0005623,GO:0005737,GO:0009507,GO:0009534,GO:0009535,GO:0009536,GO:0009543,GO:0009579,GO:0016020,GO:0031976,GO:0031977,GO:0031978,GO:0031984,GO:0034357,GO:0042651,GO:0043226,GO:0043227,GO:0043229,GO:0043231,GO:0044422,GO:0044424,GO:0044434,GO:0044435,GO:0044436,GO:0044444,GO:0044446,GO:0044464,GO:0055035	-	-	-	-	-	-	-	-	-	-	Pentapeptide
Crochr1G000127.m1	29760.VIT_04s0044g01310.t01	2.39e-53	173	2ANJB@1|root,2RZEJ@2759|Eukaryota,37UPP@33090|Viridiplantae,3GIGS@35493|Streptophyta	35493|Streptophyta	S	subunit O	-	GO:0005575,GO:0005622,GO:0005623,GO:0005737,GO:0008150,GO:0009507,GO:0009534,GO:0009535,GO:0009536,GO:0009579,GO:0009987,GO:0010257,GO:0010258,GO:0010598,GO:0016020,GO:0016043,GO:0022607,GO:0031976,GO:0031984,GO:0032991,GO:0034357,GO:0034622,GO:0042651,GO:0043226,GO:0043227,GO:0043229,GO:0043231,GO:0043933,GO:0044085,GO:0044422,GO:0044424,GO:0044425,GO:0044434,GO:0044435,GO:0044436,GO:0044444,GO:…	-	-	-	-	-	-	-	-	-	-	NdhO
Crochr1G000127.m2	50452.A0A087HIH5	1.02e-25	102	2ANJB@1|root,2RZEJ@2759|Eukaryota,37UPP@33090|Viridiplantae,3GIGS@35493|Streptophyta,3HUEH@3699|Brassicales	35493|Streptophyta	S	Cyanobacterial and plant NDH-1 subunit O	-	GO:0005575,GO:0005622,GO:0005623,GO:0005737,GO:0008150,GO:0009507,GO:0009534,GO:0009535,GO:0009536,GO:0009579,GO:0009987,GO:0010257,GO:0010258,GO:0010598,GO:0016020,GO:0016043,GO:0022607,GO:0031976,GO:0031984,GO:0032991,GO:0034357,GO:0034622,GO:0042651,GO:0043226,GO:0043227,GO:0043229,GO:0043231,GO:0043933,GO:0044085,GO:0044422,GO:0044424,GO:0044425,GO:0044434,GO:0044435,GO:0044436,GO:0044444,GO:…	-	-	-	-	-	-	-	-	-	-	NdhO
Crochr1G000128.m1	42345.XP_008795229.1	1.03e-56	181	KOG3402@1|root,KOG3402@2759|Eukaryota,37VV7@33090|Viridiplantae,3GINV@35493|Streptophyta,3KZCU@4447|Liliopsida	35493|Streptophyta	S	Presenilin enhancer-2 subunit of gamma secretase	-	GO:0005575,GO:0005622,GO:0005623,GO:0005737,GO:0005798,GO:0005886,GO:0016020,GO:0031410,GO:0031982,GO:0032991,GO:0043226,GO:0043227,GO:0043229,GO:0044424,GO:0044425,GO:0044444,GO:0044459,GO:0044464,GO:0070765,GO:0071944,GO:0097708,GO:0098796,GO:0098797	-	ko:K06170	ko04330,ko05010,map04330,map05010	M00682	-	-	ko00000,ko00001,ko00002	-	-	-	PEN-2
Crochr1G000129.m1	42345.XP_008778490.1	1.97e-98	327	KOG4658@1|root,KOG4658@2759|Eukaryota,37SST@33090|Viridiplantae,3GEUD@35493|Streptophyta,3KU77@4447|Liliopsida	35493|Streptophyta	T	NB-ARC domain	-	-	-	-	-	-	-	-	-	-	-	-	NB-ARC
Crochr1G000130.m1	42345.XP_008807673.1	3.58e-61	209	KOG1721@1|root,KOG1721@2759|Eukaryota,37R73@33090|Viridiplantae,3G7I3@35493|Streptophyta,3KS6W@4447|Liliopsida	35493|Streptophyta	C	Zinc finger, C2H2 type	-	GO:0001101,GO:0002831,GO:0003674,GO:0003676,GO:0003677,GO:0005488,GO:0005575,GO:0005622,GO:0005623,GO:0005634,GO:0006355,GO:0006950,GO:0006970,GO:0008150,GO:0009314,GO:0009414,GO:0009415,GO:0009416,GO:0009628,GO:0009642,GO:0009646,GO:0009651,GO:0009719,GO:0009725,GO:0009737,GO:0009787,GO:0009788,GO:0009889,GO:0009890,GO:0009891,GO:0009892,GO:0009893,GO:0009966,GO:0009968,GO:0010033,GO:0010035,GO:…	-	ko:K09201,ko:K20828	-	-	-	-	ko00000,ko03000,ko03021,ko03029,ko03036	-	-	-	zf-C2H2
Crochr1G000131.m1	29760.VIT_17s0000g00230.t01	3.27e-141	424	KOG0265@1|root,KOG0265@2759|Eukaryota,37Q2G@33090|Viridiplantae,3GA0F@35493|Streptophyta	35493|Streptophyta	A	WD40 repeats	-	-	-	-	-	-	-	-	-	-	-	-	WD40
Crochr1G000132.m1	4558.Sb03g046580.1	2.28e-197	556	KOG1327@1|root,KOG1327@2759|Eukaryota,37MKE@33090|Viridiplantae,3GB2K@35493|Streptophyta,3KMWG@4447|Liliopsida,3I65T@38820|Poales	35493|Streptophyta	O	Copine	-	-	2.3.2.27	ko:K16280	-	-	-	-	ko00000,ko01000,ko04121	-	-	-	Copine,zf-C3HC4_3
Crochr1G000132.m2	4558.Sb03g046580.1	2.28e-197	556	KOG1327@1|root,KOG1327@2759|Eukaryota,37MKE@33090|Viridiplantae,3GB2K@35493|Streptophyta,3KMWG@4447|Liliopsida,3I65T@38820|Poales	35493|Streptophyta	O	Copine	-	-	2.3.2.27	ko:K16280	-	-	-	-	ko00000,ko01000,ko04121	-	-	-	Copine,zf-C3HC4_3
Crochr1G000132.m3	4558.Sb03g046580.1	2.28e-197	556	KOG1327@1|root,KOG1327@2759|Eukaryota,37MKE@33090|Viridiplantae,3GB2K@35493|Streptophyta,3KMWG@4447|Liliopsida,3I65T@38820|Poales	35493|Streptophyta	O	Copine	-	-	2.3.2.27	ko:K16280	-	-	-	-	ko00000,ko01000,ko04121	-	-	-	Copine,zf-C3HC4_3
Crochr1G000134.m1	4537.OPUNC01G10980.1	2.36e-229	635	COG0473@1|root,KOG0785@2759|Eukaryota,37KMU@33090|Viridiplantae,3G86Y@35493|Streptophyta,3KR9I@4447|Liliopsida,3I77B@38820|Poales	35493|Streptophyta	E	Isocitrate dehydrogenase NAD subunit, mitochondrial	-	-	1.1.1.41	ko:K00030	ko00020,ko01100,ko01110,ko01120,ko01130,ko01200,ko01210,ko01230,map00020,map01100,map01110,map01120,map01130,map01200,map01210,map01230	M00009,M00010	R00709	RC00114	br01601,ko00000,ko00001,ko00002,ko01000	-	-	-	Iso_dh
Crochr1G000134.m2	4537.OPUNC01G10980.1	2.36e-229	635	COG0473@1|root,KOG0785@2759|Eukaryota,37KMU@33090|Viridiplantae,3G86Y@35493|Streptophyta,3KR9I@4447|Liliopsida,3I77B@38820|Poales	35493|Streptophyta	E	Isocitrate dehydrogenase NAD subunit, mitochondrial	-	-	1.1.1.41	ko:K00030	ko00020,ko01100,ko01110,ko01120,ko01130,ko01200,ko01210,ko01230,map00020,map01100,map01110,map01120,map01130,map01200,map01210,map01230	M00009,M00010	R00709	RC00114	br01601,ko00000,ko00001,ko00002,ko01000	-	-	-	Iso_dh
Crochr1G000134.m3	4537.OPUNC01G10980.1	2.36e-229	635	COG0473@1|root,KOG0785@2759|Eukaryota,37KMU@33090|Viridiplantae,3G86Y@35493|Streptophyta,3KR9I@4447|Liliopsida,3I77B@38820|Poales	35493|Streptophyta	E	Isocitrate dehydrogenase NAD subunit, mitochondrial	-	-	1.1.1.41	ko:K00030	ko00020,ko01100,ko01110,ko01120,ko01130,ko01200,ko01210,ko01230,map00020,map01100,map01110,map01120,map01130,map01200,map01210,map01230	M00009,M00010	R00709	RC00114	br01601,ko00000,ko00001,ko00002,ko01000	-	-	-	Iso_dh
Crochr1G000135.m1	38727.Pavir.Ea04083.1.p	0	1127	COG0445@1|root,KOG2311@2759|Eukaryota,37MX7@33090|Viridiplantae,3GCHY@35493|Streptophyta,3KQMU@4447|Liliopsida,3IA67@38820|Poales	35493|Streptophyta	J	GidA associated domain 3	-	GO:0000166,GO:0001510,GO:0002097,GO:0002098,GO:0003674,GO:0005488,GO:0005575,GO:0005622,GO:0005623,GO:0005737,GO:0005829,GO:0006139,GO:0006396,GO:0006399,GO:0006400,GO:0006725,GO:0006807,GO:0008033,GO:0008150,GO:0008152,GO:0009451,GO:0009987,GO:0010467,GO:0016070,GO:0030488,GO:0032259,GO:0034470,GO:0034641,GO:0034660,GO:0036094,GO:0043167,GO:0043168,GO:0043170,GO:0043412,GO:0043414,GO:0044237,GO:…	-	ko:K03495	-	-	R08701	RC00053,RC00209,RC00870	ko00000,ko03016,ko03036	-	-	-	GIDA,GIDA_assoc
Crochr1G000136.m1	4641.GSMUA_Achr3P22040_001	9.28e-96	323	2CMGW@1|root,2QQB7@2759|Eukaryota,37PWC@33090|Viridiplantae,3GD4T@35493|Streptophyta,3KN1K@4447|Liliopsida	35493|Streptophyta	S	Protein of unknown function (DUF632)	-	-	-	-	-	-	-	-	-	-	-	-	DUF630,DUF632
Crochr1G000137.m1	4558.Sb09g023730.1	0	984	COG0475@1|root,KOG1650@2759|Eukaryota,37RFT@33090|Viridiplantae,3GF22@35493|Streptophyta,3KRES@4447|Liliopsida,3IC6Y@38820|Poales	35493|Streptophyta	P	Sodium/hydrogen exchanger family	-	GO:0005575,GO:0005623,GO:0006810,GO:0006811,GO:0006812,GO:0006885,GO:0008150,GO:0012505,GO:0015672,GO:0042592,GO:0044464,GO:0048878,GO:0050801,GO:0051179,GO:0051234,GO:0055067,GO:0055080,GO:0065007,GO:0065008,GO:0098771	-	-	-	-	-	-	-	-	-	-	Na_H_Exchanger
Crochr1G000138.m1	4641.GSMUA_Achr10P10810_001	0	956	COG0688@1|root,KOG2419@2759|Eukaryota,37JS4@33090|Viridiplantae,3GCZ0@35493|Streptophyta,3KW0E@4447|Liliopsida	35493|Streptophyta	I	Catalyzes the formation of phosphatidylethanolamine (PtdEtn) from phosphatidylserine (PtdSer). Plays a central role in phospholipid metabolism and in the interorganelle trafficking of phosphatidylserine	PSD2	GO:0000325,GO:0003674,GO:0003824,GO:0004609,GO:0005575,GO:0005622,GO:0005623,GO:0005737,GO:0005773,GO:0005774,GO:0005783,GO:0009705,GO:0012505,GO:0016020,GO:0016829,GO:0016830,GO:0016831,GO:0031090,GO:0043226,GO:0043227,GO:0043229,GO:0043231,GO:0044422,GO:0044424,GO:0044437,GO:0044444,GO:0044446,GO:0044464,GO:0098588,GO:0098805	4.1.1.65	ko:K01613	ko00564,ko01100,ko01110,map00564,map01100,map01110	M00093	R02055	RC00299	ko00000,ko00001,ko00002,ko01000	-	-	-	C2,EF-hand_5,EF-hand_8,PS_Dcarbxylase
Crochr1G000139.m1	65489.OBART01G44510.1	5.65e-48	172	KOG0118@1|root,KOG0118@2759|Eukaryota,37QK5@33090|Viridiplantae,3GGZU@35493|Streptophyta,3KRPQ@4447|Liliopsida,3I4QQ@38820|Poales	35493|Streptophyta	A	RNA recognition motif. (a.k.a. RRM, RBD, or RNP domain)	-	-	-	ko:K14325	ko03013,ko03015,map03013,map03015	M00430	-	-	ko00000,ko00001,ko00002,ko03019	-	-	-	RRM_1
Crochr1G000140.m1	4641.GSMUA_Achr8P29370_001	1.07e-46	152	2BW0D@1|root,2S3MJ@2759|Eukaryota,37W0A@33090|Viridiplantae,3GK9K@35493|Streptophyta,3M0WC@4447|Liliopsida	35493|Streptophyta	-	-	-	-	-	-	-	-	-	-	-	-	-	-	-
Crochr1G000141.m1	42345.XP_008784132.1	3.66e-21	91.7	KOG0800@1|root,KOG0800@2759|Eukaryota	2759|Eukaryota	O	ubiquitin-protein transferase activity	-	-	-	-	-	-	-	-	-	-	-	-	zf-RING_2
Crochr1G000142.m1	38727.Pavir.Eb03974.1.p	2.12e-117	348	28MV7@1|root,2QUDI@2759|Eukaryota,37S6W@33090|Viridiplantae,3GGYV@35493|Streptophyta,3KVCN@4447|Liliopsida,3IESW@38820|Poales	35493|Streptophyta	S	Lipid-droplet associated hydrolase	-	-	-	-	-	-	-	-	-	-	-	-	LIDHydrolase
Crochr1G000142.m2	38727.Pavir.Eb03974.1.p	1.22e-116	346	28MV7@1|root,2QUDI@2759|Eukaryota,37S6W@33090|Viridiplantae,3GGYV@35493|Streptophyta,3KVCN@4447|Liliopsida,3IESW@38820|Poales	35493|Streptophyta	S	Lipid-droplet associated hydrolase	-	-	-	-	-	-	-	-	-	-	-	-	LIDHydrolase
Crochr1G000144.m1	42345.XP_008786569.1	1.23e-191	540	COG3240@1|root,2QQWI@2759|Eukaryota,37R94@33090|Viridiplantae,3G9U1@35493|Streptophyta,3KS6B@4447|Liliopsida	35493|Streptophyta	I	GDSL-like Lipase/Acylhydrolase	-	-	-	-	-	-	-	-	-	-	-	-	Lipase_GDSL
Crochr1G000145.m1	4432.XP_010268178.1	9.09e-110	331	KOG1990@1|root,KOG1990@2759|Eukaryota,37ST4@33090|Viridiplantae,3GEBA@35493|Streptophyta	35493|Streptophyta	L	CRM domain-containing protein At3g25440	-	-	-	-	-	-	-	-	-	-	-	-	CRS1_YhbY
Crochr1G000145.m2	4533.OB01G53660.1	1.68e-123	369	KOG1990@1|root,KOG1990@2759|Eukaryota,37ST4@33090|Viridiplantae,3GEBA@35493|Streptophyta,3KNTY@4447|Liliopsida,3I4I5@38820|Poales	35493|Streptophyta	L	CRS1_YhbY	-	-	-	-	-	-	-	-	-	-	-	-	CRS1_YhbY
Crochr1G000145.m3	4432.XP_010268178.1	9.09e-110	331	KOG1990@1|root,KOG1990@2759|Eukaryota,37ST4@33090|Viridiplantae,3GEBA@35493|Streptophyta	35493|Streptophyta	L	CRM domain-containing protein At3g25440	-	-	-	-	-	-	-	-	-	-	-	-	CRS1_YhbY
Crochr1G000145.m4	4432.XP_010268178.1	9.09e-110	331	KOG1990@1|root,KOG1990@2759|Eukaryota,37ST4@33090|Viridiplantae,3GEBA@35493|Streptophyta	35493|Streptophyta	L	CRM domain-containing protein At3g25440	-	-	-	-	-	-	-	-	-	-	-	-	CRS1_YhbY
Crochr1G000146.m1	42345.XP_008786477.1	0	929	2CMCM@1|root,2QPZ4@2759|Eukaryota,37S4A@33090|Viridiplantae,3GDB2@35493|Streptophyta,3KU6R@4447|Liliopsida	35493|Streptophyta	S	MACPF domain-containing protein	-	GO:0005575,GO:0005623,GO:0005886,GO:0016020,GO:0044464,GO:0071944	-	-	-	-	-	-	-	-	-	-	MACPF
Crochr1G000147.m1	77586.LPERR02G03890.1	6.48e-85	260	28JD3@1|root,2QRRY@2759|Eukaryota,37MMD@33090|Viridiplantae,3GFNG@35493|Streptophyta,3KSWA@4447|Liliopsida,3ID4S@38820|Poales	35493|Streptophyta	S	Whirly transcription factor	-	GO:0003674,GO:0003676,GO:0003677,GO:0003723,GO:0003729,GO:0005488,GO:0005575,GO:0005622,GO:0005623,GO:0005737,GO:0005739,GO:0006139,GO:0006259,GO:0006281,GO:0006725,GO:0006807,GO:0006950,GO:0006952,GO:0006974,GO:0008150,GO:0008152,GO:0009987,GO:0033554,GO:0034641,GO:0043170,GO:0043226,GO:0043227,GO:0043229,GO:0043231,GO:0044237,GO:0044238,GO:0044260,GO:0044424,GO:0044444,GO:0044464,GO:0046483,GO:…	-	-	-	-	-	-	-	-	-	-	Whirly
Crochr1G000148.m1	29760.VIT_18s0089g00610.t01	2.07e-79	241	2AAJE@1|root,2RYM9@2759|Eukaryota,37TQ4@33090|Viridiplantae,3GHYM@35493|Streptophyta	35493|Streptophyta	S	Uncharacterized protein conserved in bacteria (DUF2062)	-	-	-	-	-	-	-	-	-	-	-	-	DUF2062
Crochr1G000148.m2	29760.VIT_18s0089g00610.t01	2.38e-77	236	2AAJE@1|root,2RYM9@2759|Eukaryota,37TQ4@33090|Viridiplantae,3GHYM@35493|Streptophyta	35493|Streptophyta	S	Uncharacterized protein conserved in bacteria (DUF2062)	-	-	-	-	-	-	-	-	-	-	-	-	DUF2062
Crochr1G000148.m3	29760.VIT_18s0089g00610.t01	2.07e-79	241	2AAJE@1|root,2RYM9@2759|Eukaryota,37TQ4@33090|Viridiplantae,3GHYM@35493|Streptophyta	35493|Streptophyta	S	Uncharacterized protein conserved in bacteria (DUF2062)	-	-	-	-	-	-	-	-	-	-	-	-	DUF2062
Crochr1G000149.m1	42345.XP_008795298.1	2.81e-219	617	2D28D@1|root,2SKVC@2759|Eukaryota,37Z6P@33090|Viridiplantae,3GNA0@35493|Streptophyta,3M273@4447|Liliopsida	35493|Streptophyta	G	Glycosyl hydrolase family 9	-	-	-	-	-	-	-	-	-	-	-	-	Glyco_hydro_9
Crochr1G000150.m1	4577.GRMZM2G060857_P01	1.79e-238	672	KOG2982@1|root,KOG2982@2759|Eukaryota,37JI2@33090|Viridiplantae,3GBIZ@35493|Streptophyta,3KRS6@4447|Liliopsida,3I7C5@38820|Poales	35493|Streptophyta	S	pfi,tfc e	-	GO:0000003,GO:0003006,GO:0005575,GO:0005622,GO:0005623,GO:0005737,GO:0006457,GO:0007023,GO:0007275,GO:0008150,GO:0009507,GO:0009536,GO:0009790,GO:0009791,GO:0009793,GO:0009987,GO:0010154,GO:0022414,GO:0032501,GO:0032502,GO:0043226,GO:0043227,GO:0043229,GO:0043231,GO:0044424,GO:0044444,GO:0044464,GO:0048316,GO:0048608,GO:0048731,GO:0048856,GO:0061458	-	ko:K21768	-	-	-	-	ko00000,ko04812	-	-	-	CAP_GLY,LRR_9
Crochr1G000151.m1	42345.XP_008782870.1	4.48e-206	604	COG5641@1|root,KOG1601@2759|Eukaryota,389BF@33090|Viridiplantae,3GYCT@35493|Streptophyta,3MAY4@4447|Liliopsida	35493|Streptophyta	K	plant mutator transposase zinc finger	-	-	-	ko:K17604	-	-	-	-	ko00000,ko01009	-	-	-	FAR1,GATA,MULE,SWIM
Crochr1G000153.m2	4081.Solyc11g042620.1.1	2.13e-77	239	2CXH7@1|root,2RXGM@2759|Eukaryota,37TQR@33090|Viridiplantae,3GI14@35493|Streptophyta,44J85@71274|asterids	35493|Streptophyta	S	SnoaL-like polyketide cyclase	-	-	-	-	-	-	-	-	-	-	-	-	NTF2,SnoaL_2
Crochr1G000153.m3	4081.Solyc11g042620.1.1	2.13e-77	239	2CXH7@1|root,2RXGM@2759|Eukaryota,37TQR@33090|Viridiplantae,3GI14@35493|Streptophyta,44J85@71274|asterids	35493|Streptophyta	S	SnoaL-like polyketide cyclase	-	-	-	-	-	-	-	-	-	-	-	-	NTF2,SnoaL_2
Crochr1G000153.m1	4081.Solyc11g042620.1.1	2.13e-77	239	2CXH7@1|root,2RXGM@2759|Eukaryota,37TQR@33090|Viridiplantae,3GI14@35493|Streptophyta,44J85@71274|asterids	35493|Streptophyta	S	SnoaL-like polyketide cyclase	-	-	-	-	-	-	-	-	-	-	-	-	NTF2,SnoaL_2
Crochr1G000154.m1	42345.XP_008776174.1	7.25e-77	246	COG0666@1|root,KOG0504@2759|Eukaryota,37K32@33090|Viridiplantae,3GC6W@35493|Streptophyta,3KX72@4447|Liliopsida	35493|Streptophyta	S	Ankyrin repeat domain-containing protein	-	GO:0003674,GO:0005048,GO:0005488,GO:0005575,GO:0005622,GO:0005623,GO:0005634,GO:0005737,GO:0005886,GO:0006355,GO:0006605,GO:0006810,GO:0006886,GO:0008104,GO:0008150,GO:0008289,GO:0009507,GO:0009526,GO:0009527,GO:0009536,GO:0009707,GO:0009889,GO:0009941,GO:0010468,GO:0010556,GO:0015031,GO:0015833,GO:0016020,GO:0016021,GO:0019219,GO:0019222,GO:0019867,GO:0030941,GO:0031090,GO:0031224,GO:0031300,GO:…	-	-	-	-	-	-	-	-	-	-	Ank_2,Ank_3,Ank_4
Crochr1G000155.m1	42345.XP_008781985.1	1.75e-199	563	COG0343@1|root,KOG3909@2759|Eukaryota,37Q2J@33090|Viridiplantae,3GBMK@35493|Streptophyta,3KUAP@4447|Liliopsida	35493|Streptophyta	A	Non-catalytic subunit of the queuine tRNA- ribosyltransferase (TGT) that catalyzes the base-exchange of a guanine (G) residue with queuine (Q) at position 34 (anticodon wobble position) in tRNAs with GU(N) anticodons (tRNA-Asp, -Asn, - His and -Tyr), resulting in the hypermodified nucleoside queuosine (7-(((4,5-cis-dihydroxy-2-cyclopenten-1-yl)amino)methyl)-7- deazaguanosine)	-	-	2.4.2.29	ko:K15407	-	-	R03789,R10209	RC00063	ko00000,ko01000,ko03016	-	-	-	TGT
Crochr1G000156.m1	77586.LPERR09G01650.1	6.68e-286	842	KOG4658@1|root,KOG4658@2759|Eukaryota,37JN7@33090|Viridiplantae,3GAV6@35493|Streptophyta,3KXEB@4447|Liliopsida,3IB1A@38820|Poales	35493|Streptophyta	T	disease resistance protein	-	-	-	-	-	-	-	-	-	-	-	-	LRR_8,NB-ARC
Crochr1G000157.m1	4558.Sb09g000550.1	5.56e-125	358	KOG0084@1|root,KOG0084@2759|Eukaryota,37PGN@33090|Viridiplantae,3GD0A@35493|Streptophyta,3KNJI@4447|Liliopsida,3I5AZ@38820|Poales	35493|Streptophyta	U	Ras family	-	GO:0000139,GO:0003674,GO:0005488,GO:0005515,GO:0005575,GO:0005622,GO:0005623,GO:0005737,GO:0005794,GO:0005802,GO:0005886,GO:0006810,GO:0006888,GO:0008092,GO:0008150,GO:0012505,GO:0016020,GO:0016192,GO:0017022,GO:0030742,GO:0031090,GO:0031984,GO:0032029,GO:0032036,GO:0032588,GO:0043226,GO:0043227,GO:0043229,GO:0043231,GO:0044422,GO:0044424,GO:0044431,GO:0044444,GO:0044446,GO:0044464,GO:0046907,GO:…	-	ko:K07874	ko05134,map05134	-	-	-	ko00000,ko00001,ko04031,ko04131,ko04147	-	-	-	Ras
Crochr1G000158.m1	77586.LPERR05G00370.1	1.01e-126	363	COG1100@1|root,KOG0087@2759|Eukaryota,37J9I@33090|Viridiplantae,3G78Y@35493|Streptophyta,3KN2U@4447|Liliopsida,3I922@38820|Poales	35493|Streptophyta	U	Ras family	-	GO:0000278,GO:0000281,GO:0000910,GO:0000911,GO:0005575,GO:0005622,GO:0005623,GO:0005737,GO:0005768,GO:0005829,GO:0005886,GO:0007049,GO:0008150,GO:0009504,GO:0009987,GO:0012505,GO:0016020,GO:0022402,GO:0031410,GO:0031982,GO:0032506,GO:0043226,GO:0043227,GO:0043229,GO:0044424,GO:0044444,GO:0044464,GO:0051301,GO:0061640,GO:0071944,GO:0097708,GO:1902410,GO:1903047	-	ko:K07904	ko04144,ko04961,ko04962,ko04972,map04144,map04961,map04962,map04972	-	-	-	ko00000,ko00001,ko04031,ko04131,ko04147	-	-	-	Ras
Crochr1G000159.m1	4641.GSMUA_Achr6P28900_001	3.12e-190	537	2CMGR@1|root,2QQAP@2759|Eukaryota,37QXA@33090|Viridiplantae,3GCDY@35493|Streptophyta,3KTF0@4447|Liliopsida	35493|Streptophyta	S	GDSL-like Lipase/Acylhydrolase	-	-	-	-	-	-	-	-	-	-	-	-	Lipase_GDSL
Crochr1G000160.m1	42345.XP_008808958.1	0	1503	2CMVN@1|root,2QS81@2759|Eukaryota,37QCI@33090|Viridiplantae,3G9HZ@35493|Streptophyta,3KX9S@4447|Liliopsida	35493|Streptophyta	H	Methionine S-methyltransferase	MMT	GO:0001887,GO:0003674,GO:0003824,GO:0005575,GO:0005622,GO:0005623,GO:0005737,GO:0005829,GO:0006732,GO:0006790,GO:0008150,GO:0008152,GO:0008168,GO:0008757,GO:0009987,GO:0016740,GO:0016741,GO:0017144,GO:0032259,GO:0044237,GO:0044424,GO:0044444,GO:0044464,GO:0046500,GO:0051186,GO:0071704	2.1.1.12	ko:K08247	ko00450,map00450	-	R04772	RC00003,RC01212	ko00000,ko00001,ko01000	-	-	-	Aminotran_1_2,MTS,Methyltransf_31
Crochr1G000161.m1	42345.XP_008792869.1	0	1013	COG1404@1|root,2QZDA@2759|Eukaryota,37QS2@33090|Viridiplantae,3GD1X@35493|Streptophyta,3KNAP@4447|Liliopsida	35493|Streptophyta	G	PA domain	-	GO:0001763,GO:0003674,GO:0003824,GO:0004175,GO:0004252,GO:0005575,GO:0005576,GO:0005618,GO:0005622,GO:0005623,GO:0005737,GO:0005773,GO:0005774,GO:0006508,GO:0006807,GO:0007275,GO:0007568,GO:0008150,GO:0008152,GO:0008233,GO:0008236,GO:0009505,GO:0009653,GO:0010016,GO:0010150,GO:0010223,GO:0010346,GO:0016020,GO:0016787,GO:0017171,GO:0019538,GO:0030312,GO:0031090,GO:0032501,GO:0032502,GO:0043170,GO:…	-	-	-	-	-	-	-	-	-	-	Inhibitor_I9,PA,Peptidase_S8
Crochr1G000162.m1	42345.XP_008801554.1	6.66e-116	342	KOG4642@1|root,KOG4642@2759|Eukaryota,37PZI@33090|Viridiplantae,3GCAS@35493|Streptophyta,3KSDA@4447|Liliopsida	35493|Streptophyta	O	Modified RING finger domain	-	-	2.3.2.27	ko:K09561	ko04120,ko04141,map04120,map04141	-	-	-	ko00000,ko00001,ko01000,ko03110,ko04121,ko04131	-	-	-	TPR_8,U-box
Crochr1G000163.m1	4641.GSMUA_Achr2P20800_001	3.01e-223	620	COG1902@1|root,KOG0134@2759|Eukaryota,37NVQ@33090|Viridiplantae,3GAWK@35493|Streptophyta,3KNRA@4447|Liliopsida	35493|Streptophyta	C	12-oxophytodienoate reductase 1	-	GO:0003674,GO:0003824,GO:0005575,GO:0005622,GO:0005623,GO:0006082,GO:0006629,GO:0006631,GO:0006633,GO:0006950,GO:0006952,GO:0008150,GO:0008152,GO:0008610,GO:0009058,GO:0009694,GO:0009695,GO:0009987,GO:0010817,GO:0016053,GO:0016491,GO:0016627,GO:0016628,GO:0016629,GO:0019752,GO:0031407,GO:0031408,GO:0032787,GO:0042445,GO:0042446,GO:0043436,GO:0044237,GO:0044238,GO:0044249,GO:0044255,GO:0044281,GO:…	1.3.1.42	ko:K05894	ko00592,ko01100,ko01110,map00592,map01100,map01110	M00113	R03401	RC00921	ko00000,ko00001,ko00002,ko01000	-	-	-	Oxidored_FMN
Crochr1G000163.m2	4641.GSMUA_Achr2P20800_001	7.07e-222	616	COG1902@1|root,KOG0134@2759|Eukaryota,37NVQ@33090|Viridiplantae,3GAWK@35493|Streptophyta,3KNRA@4447|Liliopsida	35493|Streptophyta	C	12-oxophytodienoate reductase 1	-	GO:0003674,GO:0003824,GO:0005575,GO:0005622,GO:0005623,GO:0006082,GO:0006629,GO:0006631,GO:0006633,GO:0006950,GO:0006952,GO:0008150,GO:0008152,GO:0008610,GO:0009058,GO:0009694,GO:0009695,GO:0009987,GO:0010817,GO:0016053,GO:0016491,GO:0016627,GO:0016628,GO:0016629,GO:0019752,GO:0031407,GO:0031408,GO:0032787,GO:0042445,GO:0042446,GO:0043436,GO:0044237,GO:0044238,GO:0044249,GO:0044255,GO:0044281,GO:…	1.3.1.42	ko:K05894	ko00592,ko01100,ko01110,map00592,map01100,map01110	M00113	R03401	RC00921	ko00000,ko00001,ko00002,ko01000	-	-	-	Oxidored_FMN
Crochr1G000163.m3	42345.XP_008781981.1	1.74e-222	618	COG1902@1|root,KOG0134@2759|Eukaryota,37NVQ@33090|Viridiplantae,3GAWK@35493|Streptophyta,3KNRA@4447|Liliopsida	35493|Streptophyta	C	12-oxophytodienoate reductase 1	-	GO:0003674,GO:0003824,GO:0005575,GO:0005622,GO:0005623,GO:0006082,GO:0006629,GO:0006631,GO:0006633,GO:0006950,GO:0006952,GO:0008150,GO:0008152,GO:0008610,GO:0009058,GO:0009694,GO:0009695,GO:0009987,GO:0010817,GO:0016053,GO:0016491,GO:0016627,GO:0016628,GO:0016629,GO:0019752,GO:0031407,GO:0031408,GO:0032787,GO:0042445,GO:0042446,GO:0043436,GO:0044237,GO:0044238,GO:0044249,GO:0044255,GO:0044281,GO:…	1.3.1.42	ko:K05894	ko00592,ko01100,ko01110,map00592,map01100,map01110	M00113	R03401	RC00921	ko00000,ko00001,ko00002,ko01000	-	-	-	Oxidored_FMN
Crochr1G000163.m4	42345.XP_008781981.1	7.07e-222	616	COG1902@1|root,KOG0134@2759|Eukaryota,37NVQ@33090|Viridiplantae,3GAWK@35493|Streptophyta,3KNRA@4447|Liliopsida	35493|Streptophyta	C	12-oxophytodienoate reductase 1	-	GO:0003674,GO:0003824,GO:0005575,GO:0005622,GO:0005623,GO:0006082,GO:0006629,GO:0006631,GO:0006633,GO:0006950,GO:0006952,GO:0008150,GO:0008152,GO:0008610,GO:0009058,GO:0009694,GO:0009695,GO:0009987,GO:0010817,GO:0016053,GO:0016491,GO:0016627,GO:0016628,GO:0016629,GO:0019752,GO:0031407,GO:0031408,GO:0032787,GO:0042445,GO:0042446,GO:0043436,GO:0044237,GO:0044238,GO:0044249,GO:0044255,GO:0044281,GO:…	1.3.1.42	ko:K05894	ko00592,ko01100,ko01110,map00592,map01100,map01110	M00113	R03401	RC00921	ko00000,ko00001,ko00002,ko01000	-	-	-	Oxidored_FMN
Crochr1G000164.m1	42345.XP_008781981.1	3.86e-104	312	COG1902@1|root,KOG0134@2759|Eukaryota,37NVQ@33090|Viridiplantae,3GAWK@35493|Streptophyta,3KNRA@4447|Liliopsida	35493|Streptophyta	C	12-oxophytodienoate reductase 1	-	GO:0003674,GO:0003824,GO:0005575,GO:0005622,GO:0005623,GO:0006082,GO:0006629,GO:0006631,GO:0006633,GO:0006950,GO:0006952,GO:0008150,GO:0008152,GO:0008610,GO:0009058,GO:0009694,GO:0009695,GO:0009987,GO:0010817,GO:0016053,GO:0016491,GO:0016627,GO:0016628,GO:0016629,GO:0019752,GO:0031407,GO:0031408,GO:0032787,GO:0042445,GO:0042446,GO:0043436,GO:0044237,GO:0044238,GO:0044249,GO:0044255,GO:0044281,GO:…	1.3.1.42	ko:K05894	ko00592,ko01100,ko01110,map00592,map01100,map01110	M00113	R03401	RC00921	ko00000,ko00001,ko00002,ko01000	-	-	-	Oxidored_FMN
Crochr1G000165.m1	42345.XP_008801554.1	1.67e-79	246	KOG4642@1|root,KOG4642@2759|Eukaryota,37PZI@33090|Viridiplantae,3GCAS@35493|Streptophyta,3KSDA@4447|Liliopsida	35493|Streptophyta	O	Modified RING finger domain	-	-	2.3.2.27	ko:K09561	ko04120,ko04141,map04120,map04141	-	-	-	ko00000,ko00001,ko01000,ko03110,ko04121,ko04131	-	-	-	TPR_8,U-box
Crochr1G000163.m5	4641.GSMUA_Achr2P20800_001	1.22e-222	618	COG1902@1|root,KOG0134@2759|Eukaryota,37NVQ@33090|Viridiplantae,3GAWK@35493|Streptophyta,3KNRA@4447|Liliopsida	35493|Streptophyta	C	12-oxophytodienoate reductase 1	-	GO:0003674,GO:0003824,GO:0005575,GO:0005622,GO:0005623,GO:0006082,GO:0006629,GO:0006631,GO:0006633,GO:0006950,GO:0006952,GO:0008150,GO:0008152,GO:0008610,GO:0009058,GO:0009694,GO:0009695,GO:0009987,GO:0010817,GO:0016053,GO:0016491,GO:0016627,GO:0016628,GO:0016629,GO:0019752,GO:0031407,GO:0031408,GO:0032787,GO:0042445,GO:0042446,GO:0043436,GO:0044237,GO:0044238,GO:0044249,GO:0044255,GO:0044281,GO:…	1.3.1.42	ko:K05894	ko00592,ko01100,ko01110,map00592,map01100,map01110	M00113	R03401	RC00921	ko00000,ko00001,ko00002,ko01000	-	-	-	Oxidored_FMN
Crochr1G000166.m1	42345.XP_008781981.1	4.34e-216	602	COG1902@1|root,KOG0134@2759|Eukaryota,37NVQ@33090|Viridiplantae,3GAWK@35493|Streptophyta,3KNRA@4447|Liliopsida	35493|Streptophyta	C	12-oxophytodienoate reductase 1	-	GO:0003674,GO:0003824,GO:0005575,GO:0005622,GO:0005623,GO:0006082,GO:0006629,GO:0006631,GO:0006633,GO:0006950,GO:0006952,GO:0008150,GO:0008152,GO:0008610,GO:0009058,GO:0009694,GO:0009695,GO:0009987,GO:0010817,GO:0016053,GO:0016491,GO:0016627,GO:0016628,GO:0016629,GO:0019752,GO:0031407,GO:0031408,GO:0032787,GO:0042445,GO:0042446,GO:0043436,GO:0044237,GO:0044238,GO:0044249,GO:0044255,GO:0044281,GO:…	1.3.1.42	ko:K05894	ko00592,ko01100,ko01110,map00592,map01100,map01110	M00113	R03401	RC00921	ko00000,ko00001,ko00002,ko01000	-	-	-	Oxidored_FMN
Crochr1G000166.m2	42345.XP_008781981.1	4.34e-216	602	COG1902@1|root,KOG0134@2759|Eukaryota,37NVQ@33090|Viridiplantae,3GAWK@35493|Streptophyta,3KNRA@4447|Liliopsida	35493|Streptophyta	C	12-oxophytodienoate reductase 1	-	GO:0003674,GO:0003824,GO:0005575,GO:0005622,GO:0005623,GO:0006082,GO:0006629,GO:0006631,GO:0006633,GO:0006950,GO:0006952,GO:0008150,GO:0008152,GO:0008610,GO:0009058,GO:0009694,GO:0009695,GO:0009987,GO:0010817,GO:0016053,GO:0016491,GO:0016627,GO:0016628,GO:0016629,GO:0019752,GO:0031407,GO:0031408,GO:0032787,GO:0042445,GO:0042446,GO:0043436,GO:0044237,GO:0044238,GO:0044249,GO:0044255,GO:0044281,GO:…	1.3.1.42	ko:K05894	ko00592,ko01100,ko01110,map00592,map01100,map01110	M00113	R03401	RC00921	ko00000,ko00001,ko00002,ko01000	-	-	-	Oxidored_FMN
Crochr1G000166.m3	42345.XP_008781981.1	4.34e-216	602	COG1902@1|root,KOG0134@2759|Eukaryota,37NVQ@33090|Viridiplantae,3GAWK@35493|Streptophyta,3KNRA@4447|Liliopsida	35493|Streptophyta	C	12-oxophytodienoate reductase 1	-	GO:0003674,GO:0003824,GO:0005575,GO:0005622,GO:0005623,GO:0006082,GO:0006629,GO:0006631,GO:0006633,GO:0006950,GO:0006952,GO:0008150,GO:0008152,GO:0008610,GO:0009058,GO:0009694,GO:0009695,GO:0009987,GO:0010817,GO:0016053,GO:0016491,GO:0016627,GO:0016628,GO:0016629,GO:0019752,GO:0031407,GO:0031408,GO:0032787,GO:0042445,GO:0042446,GO:0043436,GO:0044237,GO:0044238,GO:0044249,GO:0044255,GO:0044281,GO:…	1.3.1.42	ko:K05894	ko00592,ko01100,ko01110,map00592,map01100,map01110	M00113	R03401	RC00921	ko00000,ko00001,ko00002,ko01000	-	-	-	Oxidored_FMN
Crochr1G000166.m4	42345.XP_008781981.1	4.34e-216	602	COG1902@1|root,KOG0134@2759|Eukaryota,37NVQ@33090|Viridiplantae,3GAWK@35493|Streptophyta,3KNRA@4447|Liliopsida	35493|Streptophyta	C	12-oxophytodienoate reductase 1	-	GO:0003674,GO:0003824,GO:0005575,GO:0005622,GO:0005623,GO:0006082,GO:0006629,GO:0006631,GO:0006633,GO:0006950,GO:0006952,GO:0008150,GO:0008152,GO:0008610,GO:0009058,GO:0009694,GO:0009695,GO:0009987,GO:0010817,GO:0016053,GO:0016491,GO:0016627,GO:0016628,GO:0016629,GO:0019752,GO:0031407,GO:0031408,GO:0032787,GO:0042445,GO:0042446,GO:0043436,GO:0044237,GO:0044238,GO:0044249,GO:0044255,GO:0044281,GO:…	1.3.1.42	ko:K05894	ko00592,ko01100,ko01110,map00592,map01100,map01110	M00113	R03401	RC00921	ko00000,ko00001,ko00002,ko01000	-	-	-	Oxidored_FMN
Crochr1G000167.m1	72658.Bostr.0556s0608.1.p	1.01e-23	110	28IWD@1|root,2QR82@2759|Eukaryota,37IT2@33090|Viridiplantae,3G9IF@35493|Streptophyta,3HY4K@3699|Brassicales	35493|Streptophyta	S	NLI interacting factor-like phosphatase	-	-	-	-	-	-	-	-	-	-	-	-	NIF
Crochr1G000167.m2	4081.Solyc02g065790.2.1	1.98e-21	105	28IWD@1|root,2QR82@2759|Eukaryota,37IT2@33090|Viridiplantae,3G9IF@35493|Streptophyta,44E5F@71274|asterids	35493|Streptophyta	S	catalytic domain of ctd-like phosphatases	-	-	-	-	-	-	-	-	-	-	-	-	NIF
Crochr1G000167.m3	4081.Solyc02g065790.2.1	1.71e-21	105	28IWD@1|root,2QR82@2759|Eukaryota,37IT2@33090|Viridiplantae,3G9IF@35493|Streptophyta,44E5F@71274|asterids	35493|Streptophyta	S	catalytic domain of ctd-like phosphatases	-	-	-	-	-	-	-	-	-	-	-	-	NIF
Crochr1G000167.m4	72658.Bostr.0556s0608.1.p	1.03e-23	110	28IWD@1|root,2QR82@2759|Eukaryota,37IT2@33090|Viridiplantae,3G9IF@35493|Streptophyta,3HY4K@3699|Brassicales	35493|Streptophyta	S	NLI interacting factor-like phosphatase	-	-	-	-	-	-	-	-	-	-	-	-	NIF
Crochr1G000167.m5	72658.Bostr.0556s0608.1.p	6.81e-24	110	28IWD@1|root,2QR82@2759|Eukaryota,37IT2@33090|Viridiplantae,3G9IF@35493|Streptophyta,3HY4K@3699|Brassicales	35493|Streptophyta	S	NLI interacting factor-like phosphatase	-	-	-	-	-	-	-	-	-	-	-	-	NIF
Crochr1G000167.m6	72658.Bostr.0556s0608.1.p	6.81e-24	110	28IWD@1|root,2QR82@2759|Eukaryota,37IT2@33090|Viridiplantae,3G9IF@35493|Streptophyta,3HY4K@3699|Brassicales	35493|Streptophyta	S	NLI interacting factor-like phosphatase	-	-	-	-	-	-	-	-	-	-	-	-	NIF
Crochr1G000168.m1	4641.GSMUA_Achr10P16380_001	6.76e-141	404	COG1957@1|root,KOG2938@2759|Eukaryota,37HXM@33090|Viridiplantae,3GC13@35493|Streptophyta,3KNC3@4447|Liliopsida	35493|Streptophyta	F	Inosine-uridine preferring nucleoside hydrolase	-	GO:0003674,GO:0003824,GO:0005575,GO:0005622,GO:0005623,GO:0005737,GO:0005829,GO:0006139,GO:0006148,GO:0006152,GO:0006725,GO:0006807,GO:0007275,GO:0007568,GO:0008150,GO:0008152,GO:0008194,GO:0008477,GO:0009056,GO:0009116,GO:0009119,GO:0009164,GO:0009987,GO:0010150,GO:0016740,GO:0016757,GO:0016758,GO:0016787,GO:0016798,GO:0016799,GO:0019439,GO:0032501,GO:0032502,GO:0034641,GO:0034655,GO:0034656,GO:…	3.2.2.3	ko:K01240	ko00240,ko00760,map00240,map00760	-	R01080,R01273,R10046	RC00033,RC00063,RC00318,RC00485	ko00000,ko00001,ko01000	-	-	-	IU_nuc_hydro
Crochr1G000168.m2	4641.GSMUA_Achr10P16380_001	1.85e-186	523	COG1957@1|root,KOG2938@2759|Eukaryota,37HXM@33090|Viridiplantae,3GC13@35493|Streptophyta,3KNC3@4447|Liliopsida	35493|Streptophyta	F	Inosine-uridine preferring nucleoside hydrolase	-	GO:0003674,GO:0003824,GO:0005575,GO:0005622,GO:0005623,GO:0005737,GO:0005829,GO:0006139,GO:0006148,GO:0006152,GO:0006725,GO:0006807,GO:0007275,GO:0007568,GO:0008150,GO:0008152,GO:0008194,GO:0008477,GO:0009056,GO:0009116,GO:0009119,GO:0009164,GO:0009987,GO:0010150,GO:0016740,GO:0016757,GO:0016758,GO:0016787,GO:0016798,GO:0016799,GO:0019439,GO:0032501,GO:0032502,GO:0034641,GO:0034655,GO:0034656,GO:…	3.2.2.3	ko:K01240	ko00240,ko00760,map00240,map00760	-	R01080,R01273,R10046	RC00033,RC00063,RC00318,RC00485	ko00000,ko00001,ko01000	-	-	-	IU_nuc_hydro
Crochr1G000169.m1	42345.XP_008801094.1	0	1065	KOG2063@1|root,KOG2063@2759|Eukaryota,37NGX@33090|Viridiplantae,3GBWV@35493|Streptophyta,3KTXM@4447|Liliopsida	35493|Streptophyta	U	Vacuolar sorting protein 39 domain 2	-	GO:0003674,GO:0005488,GO:0005515,GO:0007154,GO:0007165,GO:0008150,GO:0009987,GO:0023052,GO:0046332,GO:0050789,GO:0050794,GO:0050896,GO:0051716,GO:0065007	-	ko:K20177	ko04138,map04138	-	-	-	ko00000,ko00001,ko04131	-	-	-	CNH,Clathrin,Vps39_1,Vps39_2
Crochr1G000170.m1	42345.XP_008801014.1	7.57e-233	664	COG0515@1|root,2QSSB@2759|Eukaryota,37QYJ@33090|Viridiplantae,3G9HM@35493|Streptophyta,3KVI5@4447|Liliopsida	35493|Streptophyta	T	belongs to the protein kinase superfamily	-	GO:0003674,GO:0003824,GO:0004672,GO:0005102,GO:0005488,GO:0005515,GO:0005575,GO:0005623,GO:0005886,GO:0005911,GO:0006464,GO:0006468,GO:0006793,GO:0006796,GO:0006807,GO:0006950,GO:0006952,GO:0008150,GO:0008152,GO:0009506,GO:0009605,GO:0009607,GO:0009617,GO:0009987,GO:0010941,GO:0016020,GO:0016301,GO:0016310,GO:0016740,GO:0016772,GO:0016773,GO:0019538,GO:0030054,GO:0031347,GO:0031348,GO:0033612,GO:…	-	-	-	-	-	-	-	-	-	-	LRRNT_2,LRR_6,LRR_8,Pkinase,Pkinase_Tyr
Crochr1G000170.m2	42345.XP_008801014.1	7.57e-233	664	COG0515@1|root,2QSSB@2759|Eukaryota,37QYJ@33090|Viridiplantae,3G9HM@35493|Streptophyta,3KVI5@4447|Liliopsida	35493|Streptophyta	T	belongs to the protein kinase superfamily	-	GO:0003674,GO:0003824,GO:0004672,GO:0005102,GO:0005488,GO:0005515,GO:0005575,GO:0005623,GO:0005886,GO:0005911,GO:0006464,GO:0006468,GO:0006793,GO:0006796,GO:0006807,GO:0006950,GO:0006952,GO:0008150,GO:0008152,GO:0009506,GO:0009605,GO:0009607,GO:0009617,GO:0009987,GO:0010941,GO:0016020,GO:0016301,GO:0016310,GO:0016740,GO:0016772,GO:0016773,GO:0019538,GO:0030054,GO:0031347,GO:0031348,GO:0033612,GO:…	-	-	-	-	-	-	-	-	-	-	LRRNT_2,LRR_6,LRR_8,Pkinase,Pkinase_Tyr
Crochr1G000171.m1	42345.XP_008791806.1	3.71e-240	686	COG5210@1|root,KOG2197@2759|Eukaryota,37MQV@33090|Viridiplantae,3G9SW@35493|Streptophyta,3KSPX@4447|Liliopsida	35493|Streptophyta	T	Domain in Tre-2, BUB2p, and Cdc16p. Probable Rab-GAPs.	-	GO:0003674,GO:0005096,GO:0005488,GO:0005515,GO:0005575,GO:0005622,GO:0005623,GO:0005737,GO:0005829,GO:0006810,GO:0006886,GO:0008047,GO:0008104,GO:0008150,GO:0012505,GO:0012506,GO:0015031,GO:0015833,GO:0016020,GO:0017016,GO:0017137,GO:0019899,GO:0030234,GO:0030659,GO:0030695,GO:0031090,GO:0031267,GO:0031338,GO:0031410,GO:0031982,GO:0032879,GO:0033036,GO:0033043,GO:0034613,GO:0042886,GO:0043085,GO:…	-	ko:K21847	-	-	-	-	ko00000,ko04131	-	-	-	RabGAP-TBC
Crochr1G000172.m1	42345.XP_008793763.1	2.12e-189	545	COG2124@1|root,KOG0156@2759|Eukaryota,37PSS@33090|Viridiplantae,3GD4J@35493|Streptophyta,3KPZZ@4447|Liliopsida	35493|Streptophyta	Q	Belongs to the cytochrome P450 family	-	-	-	ko:K20617	-	-	-	-	ko00000,ko00199	-	-	-	p450
Crochr1G000173.m1	4513.MLOC_31360.1	1.95e-101	310	KOG3178@1|root,KOG3178@2759|Eukaryota,37PX0@33090|Viridiplantae,3GFUM@35493|Streptophyta,3M5N0@4447|Liliopsida,3IDZS@38820|Poales	35493|Streptophyta	S	Belongs to the class I-like SAM-binding methyltransferase superfamily. Cation-independent O- methyltransferase family	-	GO:0003674,GO:0003824,GO:0005488,GO:0005515,GO:0005575,GO:0005622,GO:0005623,GO:0005737,GO:0006725,GO:0006807,GO:0008150,GO:0008152,GO:0008168,GO:0008171,GO:0008757,GO:0009058,GO:0009812,GO:0009820,GO:0009821,GO:0009987,GO:0016740,GO:0016741,GO:0019438,GO:0030761,GO:0030766,GO:0032259,GO:0033799,GO:0034641,GO:0042802,GO:0042803,GO:0044237,GO:0044249,GO:0044271,GO:0044424,GO:0044464,GO:0046983,GO:…	2.1.1.150,2.1.1.212,2.1.1.240,2.1.1.46	ko:K13259,ko:K13262,ko:K16040	ko00943,ko00945,ko01110,map00943,map00945,map01110	-	R02931,R06564,R06794,R07722,R07724,R09872	RC00003,RC00392,RC01558	ko00000,ko00001,ko01000	-	-	-	Dimerisation,Methyltransf_2
Crochr1G000174.m1	42345.XP_008791435.1	1.49e-283	811	COG0515@1|root,2QUNW@2759|Eukaryota,37QDN@33090|Viridiplantae,3GFYS@35493|Streptophyta,3KTDX@4447|Liliopsida	35493|Streptophyta	T	Serine threonine-protein kinase	-	-	2.7.11.1	ko:K04733	ko04010,ko04064,ko04620,ko04621,ko04624,ko04722,ko05133,ko05140,ko05142,ko05145,ko05152,ko05162,ko05164,map04010,map04064,map04620,map04621,map04624,map04722,map05133,map05140,map05142,map05145,map05152,map05162,map05164	M00686	-	-	ko00000,ko00001,ko00002,ko01000,ko01001	-	-	-	B_lectin,PAN_2,Pkinase,S_locus_glycop
Crochr1G000175.m1	4432.XP_010265347.1	6.64e-110	325	COG1896@1|root,KOG3197@2759|Eukaryota,37I88@33090|Viridiplantae,3GBAA@35493|Streptophyta	35493|Streptophyta	S	HD domain-containing protein	-	-	-	ko:K07023	-	-	-	-	ko00000	-	-	-	HD_3
Crochr1G000176.m1	42345.XP_008791435.1	6.22e-250	719	COG0515@1|root,2QUNW@2759|Eukaryota,37QDN@33090|Viridiplantae,3GFYS@35493|Streptophyta,3KTDX@4447|Liliopsida	35493|Streptophyta	T	Serine threonine-protein kinase	-	-	2.7.11.1	ko:K04733	ko04010,ko04064,ko04620,ko04621,ko04624,ko04722,ko05133,ko05140,ko05142,ko05145,ko05152,ko05162,ko05164,map04010,map04064,map04620,map04621,map04624,map04722,map05133,map05140,map05142,map05145,map05152,map05162,map05164	M00686	-	-	ko00000,ko00001,ko00002,ko01000,ko01001	-	-	-	B_lectin,PAN_2,Pkinase,S_locus_glycop
Crochr1G000177.m1	42345.XP_008800391.1	3.48e-204	580	28NCH@1|root,2QUY0@2759|Eukaryota,37PZ5@33090|Viridiplantae,3GC73@35493|Streptophyta,3KUIC@4447|Liliopsida	35493|Streptophyta	S	gpi-anchored protein	-	-	-	-	-	-	-	-	-	-	-	-	-
Crochr1G000177.m2	42345.XP_008800391.1	3.48e-204	580	28NCH@1|root,2QUY0@2759|Eukaryota,37PZ5@33090|Viridiplantae,3GC73@35493|Streptophyta,3KUIC@4447|Liliopsida	35493|Streptophyta	S	gpi-anchored protein	-	-	-	-	-	-	-	-	-	-	-	-	-
Crochr1G000178.m1	4098.XP_009604515.1	1.56e-37	148	28JZP@1|root,2QSE3@2759|Eukaryota,37QZD@33090|Viridiplantae,3GGZ7@35493|Streptophyta,44TEZ@71274|asterids	35493|Streptophyta	S	MULE transposase domain	-	-	-	-	-	-	-	-	-	-	-	-	DBD_Tnp_Mut,MULE,SWIM
Crochr1G000179.m1	42345.XP_008791769.1	0	1115	28IFU@1|root,2QU8Q@2759|Eukaryota,37RBA@33090|Viridiplantae,3GDGE@35493|Streptophyta,3KNG0@4447|Liliopsida	35493|Streptophyta	E	Plant lipoxygenase may be involved in a number of diverse aspects of plant physiology including growth and development, pest resistance, and senescence or responses to wounding	-	-	1.13.11.12	ko:K00454	ko00591,ko00592,ko01100,ko01110,map00591,map00592,map01100,map01110	M00113	R03626,R07864,R07869	RC00561	ko00000,ko00001,ko00002,ko01000	-	-	-	Lipoxygenase,PLAT
Crochr1G000179.m2	42345.XP_008791769.1	0	1113	28IFU@1|root,2QU8Q@2759|Eukaryota,37RBA@33090|Viridiplantae,3GDGE@35493|Streptophyta,3KNG0@4447|Liliopsida	35493|Streptophyta	E	Plant lipoxygenase may be involved in a number of diverse aspects of plant physiology including growth and development, pest resistance, and senescence or responses to wounding	-	-	1.13.11.12	ko:K00454	ko00591,ko00592,ko01100,ko01110,map00591,map00592,map01100,map01110	M00113	R03626,R07864,R07869	RC00561	ko00000,ko00001,ko00002,ko01000	-	-	-	Lipoxygenase,PLAT
Crochr1G000180.m1	4533.OB05G19560.1	1.19e-160	461	COG0697@1|root,KOG2766@2759|Eukaryota,37SNK@33090|Viridiplantae,3G7J9@35493|Streptophyta,3KVP6@4447|Liliopsida,3I6UP@38820|Poales	35493|Streptophyta	EG	Solute carrier family 35	-	-	-	ko:K15287	-	-	-	-	ko00000,ko02000	-	-	-	SLC35F
Crochr1G000180.m2	4533.OB05G19560.1	1.19e-160	461	COG0697@1|root,KOG2766@2759|Eukaryota,37SNK@33090|Viridiplantae,3G7J9@35493|Streptophyta,3KVP6@4447|Liliopsida,3I6UP@38820|Poales	35493|Streptophyta	EG	Solute carrier family 35	-	-	-	ko:K15287	-	-	-	-	ko00000,ko02000	-	-	-	SLC35F
Crochr1G000181.m1	42345.XP_008795755.1	1.51e-66	218	2CMSG@1|root,2QRQP@2759|Eukaryota,37PT7@33090|Viridiplantae,3G8T4@35493|Streptophyta,3KXRT@4447|Liliopsida	35493|Streptophyta	S	Polygalacturonase inhibitor	-	-	-	-	-	-	-	-	-	-	-	-	LRRNT_2,LRR_1,LRR_6,LRR_8
Crochr1G000182.m1	42345.XP_008795755.1	4.13e-75	241	2CMSG@1|root,2QRQP@2759|Eukaryota,37PT7@33090|Viridiplantae,3G8T4@35493|Streptophyta,3KXRT@4447|Liliopsida	35493|Streptophyta	S	Polygalacturonase inhibitor	-	-	-	-	-	-	-	-	-	-	-	-	LRRNT_2,LRR_1,LRR_6,LRR_8
Crochr1G000183.m1	42345.XP_008795755.1	6.82e-64	213	2CMSG@1|root,2QRQP@2759|Eukaryota,37PT7@33090|Viridiplantae,3G8T4@35493|Streptophyta,3KXRT@4447|Liliopsida	35493|Streptophyta	S	Polygalacturonase inhibitor	-	-	-	-	-	-	-	-	-	-	-	-	LRRNT_2,LRR_1,LRR_6,LRR_8
Crochr1G000184.m1	15368.BRADI2G30460.1	8.41e-32	125	2C3B6@1|root,2RZJY@2759|Eukaryota,37UEV@33090|Viridiplantae,3GJ2K@35493|Streptophyta,3KZCP@4447|Liliopsida,3IGT8@38820|Poales	35493|Streptophyta	-	-	-	-	-	-	-	-	-	-	-	-	-	-	-
Crochr1G000185.m2	38727.Pavir.Ib04315.1.p	6.46e-116	332	KOG1876@1|root,KOG1876@2759|Eukaryota,37IU4@33090|Viridiplantae,3GD76@35493|Streptophyta,3KX3J@4447|Liliopsida,3IF66@38820|Poales	35493|Streptophyta	Z	Functions as actin-binding component of the Arp2 3 complex which is involved in regulation of actin polymerization and together with an activating nucleation-promoting factor (NPF) mediates the formation of branched actin networks. Seems to contact the mother actin filament	ARPC4	GO:0005575,GO:0005622,GO:0005623,GO:0005737,GO:0005829,GO:0005856,GO:0005885,GO:0005938,GO:0006810,GO:0006887,GO:0006897,GO:0006909,GO:0006996,GO:0007010,GO:0007015,GO:0008064,GO:0008150,GO:0008154,GO:0009987,GO:0010638,GO:0012506,GO:0015629,GO:0016020,GO:0016043,GO:0016192,GO:0022607,GO:0030029,GO:0030036,GO:0030041,GO:0030139,GO:0030175,GO:0030659,GO:0030666,GO:0030670,GO:0030832,GO:0030833,GO:…	-	ko:K05755	ko04144,ko04666,ko04810,ko05100,ko05130,ko05131,ko05132,map04144,map04666,map04810,map05100,map05130,map05131,map05132	-	-	-	ko00000,ko00001,ko04131,ko04812	-	-	-	ARPC4
Crochr1G000185.m1	38727.Pavir.Ib04315.1.p	1.07e-114	329	KOG1876@1|root,KOG1876@2759|Eukaryota,37IU4@33090|Viridiplantae,3GD76@35493|Streptophyta,3KX3J@4447|Liliopsida,3IF66@38820|Poales	35493|Streptophyta	Z	Functions as actin-binding component of the Arp2 3 complex which is involved in regulation of actin polymerization and together with an activating nucleation-promoting factor (NPF) mediates the formation of branched actin networks. Seems to contact the mother actin filament	ARPC4	GO:0005575,GO:0005622,GO:0005623,GO:0005737,GO:0005829,GO:0005856,GO:0005885,GO:0005938,GO:0006810,GO:0006887,GO:0006897,GO:0006909,GO:0006996,GO:0007010,GO:0007015,GO:0008064,GO:0008150,GO:0008154,GO:0009987,GO:0010638,GO:0012506,GO:0015629,GO:0016020,GO:0016043,GO:0016192,GO:0022607,GO:0030029,GO:0030036,GO:0030041,GO:0030139,GO:0030175,GO:0030659,GO:0030666,GO:0030670,GO:0030832,GO:0030833,GO:…	-	ko:K05755	ko04144,ko04666,ko04810,ko05100,ko05130,ko05131,ko05132,map04144,map04666,map04810,map05100,map05130,map05131,map05132	-	-	-	ko00000,ko00001,ko04131,ko04812	-	-	-	ARPC4
Crochr1G000186.m1	4155.Migut.N00681.1.p	4.21e-42	160	COG0515@1|root,2QSSB@2759|Eukaryota,37QYJ@33090|Viridiplantae,3G9HM@35493|Streptophyta,44DC8@71274|asterids	35493|Streptophyta	T	Probably inactive leucine-rich repeat receptor-like protein kinase At5g48380	-	GO:0003674,GO:0003824,GO:0004672,GO:0005102,GO:0005488,GO:0005515,GO:0005575,GO:0005623,GO:0005886,GO:0005911,GO:0006464,GO:0006468,GO:0006793,GO:0006796,GO:0006807,GO:0006950,GO:0006952,GO:0008150,GO:0008152,GO:0009506,GO:0009605,GO:0009607,GO:0009617,GO:0009987,GO:0010941,GO:0016020,GO:0016301,GO:0016310,GO:0016740,GO:0016772,GO:0016773,GO:0019538,GO:0030054,GO:0031347,GO:0031348,GO:0033612,GO:…	-	-	-	-	-	-	-	-	-	-	LRRNT_2,LRR_6,LRR_8,Pkinase,Pkinase_Tyr
Crochr1G000187.m1	4558.Sb01g014430.1	1.16e-11	73.9	2CMZZ@1|root,2QT0X@2759|Eukaryota,37SBS@33090|Viridiplantae,3GEC6@35493|Streptophyta,3M2MR@4447|Liliopsida,3IDGZ@38820|Poales	35493|Streptophyta	K	B3 DNA binding domain	-	-	-	-	-	-	-	-	-	-	-	-	B3
Crochr1G000188.m1	4558.Sb03g005840.1	1.15e-93	296	28M37@1|root,2QTJX@2759|Eukaryota,37RNR@33090|Viridiplantae,3GHQR@35493|Streptophyta,3M4NZ@4447|Liliopsida,3I9YA@38820|Poales	35493|Streptophyta	S	Anthranilate N-benzoyltransferase protein	-	-	2.3.1.133	ko:K13065	ko00940,ko00941,ko00945,ko01100,ko01110,map00940,map00941,map00945,map01100,map01110	M00039	R01945,R02416,R07432,R07433	RC00004,RC00055,RC02864	ko00000,ko00001,ko00002,ko01000	-	-	-	Transferase
Crochr1G000189.m1	4641.GSMUA_Achr7P16160_001	7.57e-81	261	28M37@1|root,2QTJX@2759|Eukaryota,37RNR@33090|Viridiplantae,3GHQR@35493|Streptophyta,3KTXN@4447|Liliopsida	35493|Streptophyta	S	Anthranilate N-benzoyltransferase protein	-	-	2.3.1.133	ko:K13065	ko00940,ko00941,ko00945,ko01100,ko01110,map00940,map00941,map00945,map01100,map01110	M00039	R01945,R02416,R07432,R07433	RC00004,RC00055,RC02864	ko00000,ko00001,ko00002,ko01000	-	-	-	Transferase
Crochr1G000189.m2	4641.GSMUA_Achr7P16160_001	7.57e-81	261	28M37@1|root,2QTJX@2759|Eukaryota,37RNR@33090|Viridiplantae,3GHQR@35493|Streptophyta,3KTXN@4447|Liliopsida	35493|Streptophyta	S	Anthranilate N-benzoyltransferase protein	-	-	2.3.1.133	ko:K13065	ko00940,ko00941,ko00945,ko01100,ko01110,map00940,map00941,map00945,map01100,map01110	M00039	R01945,R02416,R07432,R07433	RC00004,RC00055,RC02864	ko00000,ko00001,ko00002,ko01000	-	-	-	Transferase
Crochr1G000190.m1	42345.XP_008777439.1	7.53e-98	306	28M37@1|root,2QTJX@2759|Eukaryota,37RNR@33090|Viridiplantae,3GHQR@35493|Streptophyta,3KTXN@4447|Liliopsida	35493|Streptophyta	S	Anthranilate N-benzoyltransferase protein	-	GO:0003674,GO:0003824,GO:0016740,GO:0016746,GO:0016747,GO:0050734	2.3.1.133	ko:K13065	ko00940,ko00941,ko00945,ko01100,ko01110,map00940,map00941,map00945,map01100,map01110	M00039	R01945,R02416,R07432,R07433	RC00004,RC00055,RC02864	ko00000,ko00001,ko00002,ko01000	-	-	-	Transferase
Crochr1G000191.m1	4565.Traes_7AL_5E754746A.2	4.48e-88	271	COG1266@1|root,2QTQU@2759|Eukaryota,37QP4@33090|Viridiplantae,3GF5D@35493|Streptophyta,3KW7R@4447|Liliopsida,3IB19@38820|Poales	35493|Streptophyta	S	CAAX protease self-immunity	-	-	-	ko:K07052	-	-	-	-	ko00000	-	-	-	Abi
Crochr1G000191.m2	4565.Traes_7AL_5E754746A.2	4.48e-88	271	COG1266@1|root,2QTQU@2759|Eukaryota,37QP4@33090|Viridiplantae,3GF5D@35493|Streptophyta,3KW7R@4447|Liliopsida,3IB19@38820|Poales	35493|Streptophyta	S	CAAX protease self-immunity	-	-	-	ko:K07052	-	-	-	-	ko00000	-	-	-	Abi
Crochr1G000192.m1	42345.XP_008808077.1	6.29e-55	176	COG0633@1|root,2RZ87@2759|Eukaryota,37V1W@33090|Viridiplantae,3GIWE@35493|Streptophyta,3KZ72@4447|Liliopsida	35493|Streptophyta	C	Ferredoxins are iron-sulfur proteins that transfer electrons in a wide variety of metabolic reactions	-	-	-	ko:K02639	ko00195,map00195	-	-	-	ko00000,ko00001,ko00194	-	-	-	Fer2
Crochr1G000192.m2	42345.XP_008808077.1	6.29e-55	176	COG0633@1|root,2RZ87@2759|Eukaryota,37V1W@33090|Viridiplantae,3GIWE@35493|Streptophyta,3KZ72@4447|Liliopsida	35493|Streptophyta	C	Ferredoxins are iron-sulfur proteins that transfer electrons in a wide variety of metabolic reactions	-	-	-	ko:K02639	ko00195,map00195	-	-	-	ko00000,ko00001,ko00194	-	-	-	Fer2
[truncated: 27,729 more rows]

## Sheet: Supplementary data 5
Supplementary data 5:The number of genes contained in the orthologous gene groups of 15 species.
Orthogroup	Afri	Amb	Camel	Caps	Cinna	Coffea	Lich	NJ	Nelu	Oryza	Papav	Pbelong	Per	Pipe	Vitis
OG0000000	0	0	0	0	0	0	1325	0	0	0	0	0	0	0	0
OG0000001	0	0	0	0	0	0	850	0	0	0	0	0	0	0	0
OG0000002	0	0	5	0	0	0	789	0	0	0	0	0	0	0	0
OG0000003	0	0	0	0	0	0	580	0	0	0	0	0	0	0	0
OG0000004	4	2	50	19	85	82	72	2	21	9	56	20	27	25	40
OG0000005	18	23	45	33	33	32	29	41	53	21	31	37	22	48	31
OG0000006	21	2	95	53	40	40	32	39	33	33	34	19	5	24	25
[truncated: 38,478 more rows]

## Sheet: Supplementary data 6
Supplementary data 6：GO and KEGG Functional Enrichment Analysis of Shared Genes Within the Piper genus
[truncated: 4,330 more rows]

[truncated: 9 more sheets: Supplementary data 7, Supplementary data 8, Supplementary data 9, Supplementary data 10, Supplementary data 11, Supplementary data 12, Supplementary data 13, Supplementary data 14, Supplementary data 15]
