# Supplementary material for: A chromosome-level genome assembly and multi-omics analyses provide insights into the biosynthesis of piperlongumine in Piper sarmentosum
Source: Research Square preprint supplement (doi:10.21203/rs.3.rs-6556353/v1), 2025-11-10
Supplement: Supplementary file 3 [file b1aa680c45c9d498a2d3a280.docx]

**Description of Additional Supplementary Files**

**Supplementary Data 1:** BUSCO analysis results of the genome and coding proteins.

**Supplementary Data 2:** Repeat Sequence Prediction Score .

**Supplementary Data 3:** GO Functional Enrichment Analysis of LTR Gene Family.

**Supplementary Data 4:** PCG Prediction .

**Supplementary Data 5:** The number of genes contained in the orthologous gene groups of 15 species.

**Supplementary Data 6:** GO and KEGG Functional Enrichment Analysis of Shared Genes Within the Piper genus.

**Supplementary Data 7:** GO Functional Enrichment Analysis of Unique Gene Families.

**Supplementary Data 8:** Constructing a phylogenetic tree source file based on single-copy orthologous genes.

**Supplementary Data 9:** GO Functional Enrichment Analysis of Expansion Gene Family.

**Supplementary Data 10:** LC-MS Untargeted Metabolomics Raw Data.

**Supplementary Data 11:** KEGG functional enrichment analysis of the core modules in the metabolome.

**Supplementary Data 12:** Raw expression Data of transcriptomics and gene expression analysis of alkaloid biosynthesis pathways.

**Supplementary Data 13:** GO and KEGG Functional Enrichment Analysis of Darkgreen module.

**Supplementary Data 14:** Hub gene network and transcription factor analysis of the Darkgreen module in WGCNA analysis.

**Supplementary Data 15:** Phylogenetic analysis of PsOMT gene families in A. thaliana and P. sarmentosum.
